# Supplementary material for: Engineered EVs for Oxidative Stress Protection
Source: MDPI journal article supplement (doi:10.3390/ph14080703), 2021-07-21
Supplement: s1 [file s1]

**A**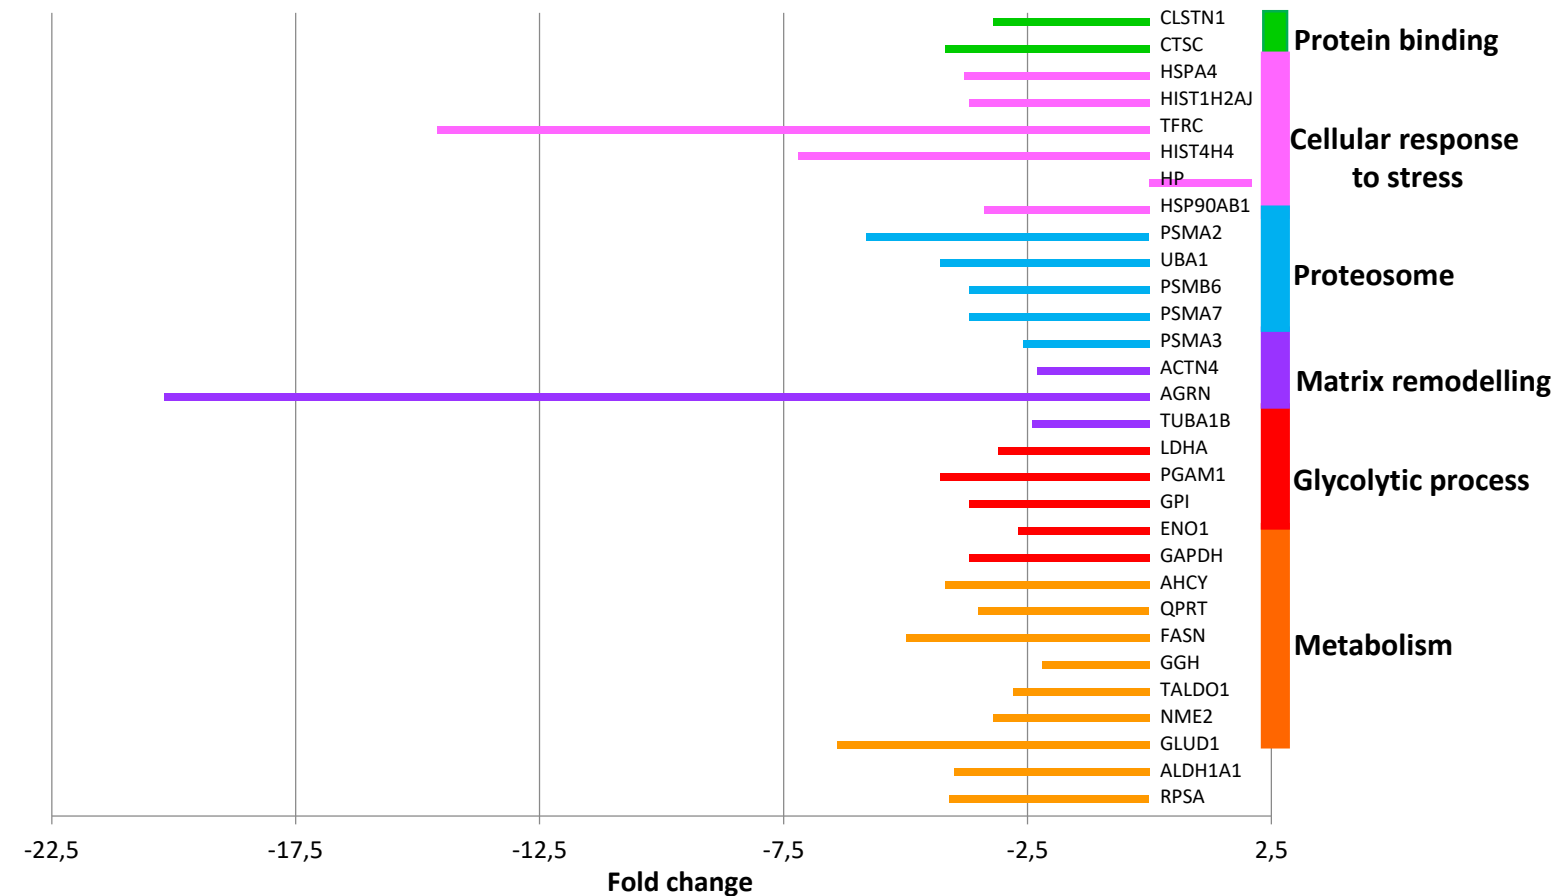**B**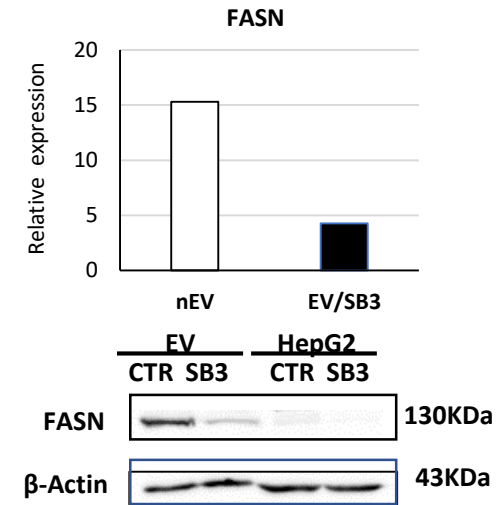**C**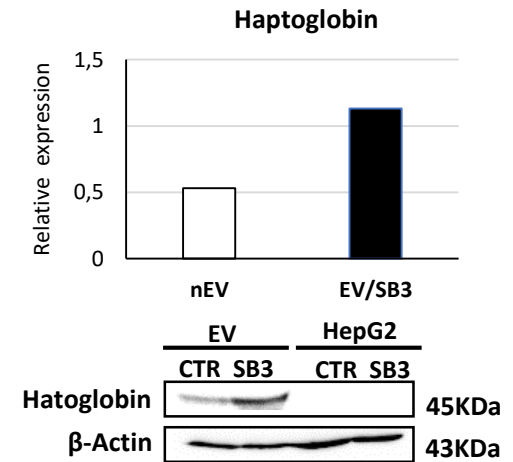

**Supplemental Figure 1: Protein modulation in Evs-SB3 compared to nEVs. A)** Graphical representation of protein modulation in EVs-SB3, in relation to biological function. The results are expressed as fold change compared to the expression of each protein in control EVs. **Right Panels:** Western blot analysis of two proteins differently expressed in EVs-SB3, compared to control EVs, FASN was chosen as underexpressed protein (**B**) and haptoglobin was chosen as over-expressed protein (**C**). Bars represent the densitometric values of Western blot results, normalized by  $\beta$ -actin expression.
