# Supplementary material for: Engineered EVs for Oxidative Stress Protection
Source: Pharmaceuticals (Basel). 2021 Jul 21;14(8):703. doi: 10.3390/ph14080703 (PMC8399368; doi:10.3390/ph14080703)
Supplement: Supplementary file 1 [file pharmaceuticals-14-00703-s001.zip › Supplementary Table S1.xlsx]

## Sheet: MaxQuant Output Data
																																				Supplemental Table 1: Lists of the proteins identified by proteomic approach.
Protein IDs	Majority protein IDs	Peptide counts (all)	Peptide counts (razor+unique)	Peptide counts (unique)	Fasta headers	Number of proteins	Peptides	Razor + unique peptides	Unique peptides	Peptides 01_CTRL	Peptides 01_SB3	Peptides 02_CTRL	Peptides 02_SB3	Peptides 03_CTRL	Peptides 03_SB3	Razor + unique peptides 01_CTRL	Razor + unique peptides 01_SB3	Razor + unique peptides 02_CTRL	Razor + unique peptides 02_SB3	Razor + unique peptides 03_CTRL	Razor + unique peptides 03_SB3	Unique peptides 01_CTRL	Unique peptides 01_SB3	Unique peptides 02_CTRL	Unique peptides 02_SB3	Unique peptides 03_CTRL	Unique peptides 03_SB3	Sequence coverage [%]	Unique + razor sequence coverage [%]	Unique sequence coverage [%]	Mol. weight [kDa]	Sequence length	Sequence lengths	Q-value	Identification type 01_CTRL	Identification type 01_SB3	Identification type 02_CTRL	Identification type 02_SB3	Identification type 03_CTRL	Identification type 03_SB3	Sequence coverage 01_CTRL [%]	Sequence coverage 01_SB3 [%]	Sequence coverage 02_CTRL [%]	Sequence coverage 02_SB3 [%]	Sequence coverage 03_CTRL [%]	Sequence coverage 03_SB3 [%]	Intensity	Intensity 01_CTRL	Intensity 01_SB3
CON__Q9TTE1;CON__A2I7N0;CON__A2I7N1	CON__Q9TTE1;CON__A2I7N0;CON__A2I7N1	5;5;4	5;5;4	5;5;4	>Q9TTE1 SWISS-PROT:Q9TTE1 (Bos taurus) Endopin-1 precursor;>A2I7N0 TREMBL:A2I7N0;Q28922;Q3ZEJ6 (Bos taurus) SERPINA3-4;>A2I7N1 TREMBL:A2I7N1 (Bos taurus) SERPINA3-5	3	5	5	5	3	4	3	2	3	2	3	4	3	2	3	2	3	4	3	2	3	2	15.6	15.6	15.6	46.203	411	411;411;411	0	By MS/MS	By MS/MS	By MS/MS	By MS/MS	By MS/MS	By MS/MS	9	13.1	9	4.1	6.6	4.1	71522000	8639600	7327700
CON__A2I7N3	CON__A2I7N3	3	1	1	>A2I7N3 TREMBL:A2I7N3;Q27984 (Bos taurus) SERPINA3-7	1	3	1	1	2	3	2	1	0	0	1	1	1	1	0	0	1	1	1	1	0	0	8.4	2.4	2.4	46.941	417	417	0.0034014	By matching	By MS/MS	By MS/MS	By matching	By matching	By matching	4.6	8.4	4.6	2.4	0	0	2175400	577480	850940
CON__ENSEMBL:ENSBTAP00000018229	CON__ENSEMBL:ENSBTAP00000018229	9	2	2	>ENSEMBL:ENSBTAP00000018229 (Bos taurus) 54 kDa protein	1	9	2	2	7	5	9	8	9	7	2	2	2	2	2	1	2	2	2	2	2	1	25.7	4.2	4.2	53.661	475	475	0	By MS/MS	By MS/MS	By MS/MS	By MS/MS	By MS/MS	By MS/MS	17.9	13.5	25.7	23.4	25.7	21.9	0	0	0
CON__ENSEMBL:ENSBTAP00000024146;tr|F5GXY0|F5GXY0_HUMAN	CON__ENSEMBL:ENSBTAP00000024146	45;1	39;1	38;0	>ENSEMBL:ENSBTAP00000024146 (Bos taurus) similar to alpha-2-macroglobulin isoform 1	2	45	39	38	36	39	44	41	41	33	30	33	38	35	35	27	30	32	37	34	34	27	43.8	40.6	40.6	164.34	1477	1477;144	0	By MS/MS	By MS/MS	By MS/MS	By MS/MS	By MS/MS	By MS/MS	36.4	39.3	42	37.9	37.4	33.4	562490000	74202000	73779000
CON__P00761	CON__P00761	4	4	4	>P00761 SWISS-PROT:P00761|TRYP_PIG Trypsin - Sus scrofa (Pig).	1	4	4	4	4	4	3	3	4	4	4	4	3	3	4	4	4	4	3	3	4	4	25.1	25.1	25.1	24.409	231	231	0	By MS/MS	By MS/MS	By MS/MS	By MS/MS	By MS/MS	By MS/MS	25.1	25.1	20.8	20.8	25.1	25.1	738200000	118500000	127460000
CON__P00978	CON__P00978	1	1	1	>P00978 SWISS-PROT:P00978 (Bos taurus) AMBP protein precursor	1	1	1	1	0	0	1	1	1	1	0	0	1	1	1	1	0	0	1	1	1	1	4.3	4.3	4.3	39.234	352	352	0	By matching	By matching	By MS/MS	By MS/MS	By MS/MS	By MS/MS	0	0	4.3	4.3	4.3	4.3	8321900	0	0
CON__P01045-1;CON__Q2KJ62;CON__P01044-1;sp|P01042-3|KNG1_HUMAN;sp|P01042-2|KNG1_HUMAN;sp|P01042|KNG1_HUMAN	CON__P01045-1;CON__Q2KJ62;CON__P01044-1	3;3;3;1;1;1	3;3;3;1;1;1	3;3;3;1;1;1	>P01045-1 SWISS-PROT:P01045-1 (Bos taurus) Isoform HMW of Kininogen-2 precursor;>Q2KJ62 TREMBL:Q2KJ62 (Bos taurus) KNG protein;>P01044-1 SWISS-PROT:P01044-1 (Bos taurus) Isoform HMW of Kininogen-1 precursor	6	3	3	3	2	2	3	3	3	2	2	2	3	3	3	2	2	2	3	3	3	2	4.7	4.7	4.7	68.709	619	619;621;621;391;427;644	0	By MS/MS	By matching	By MS/MS	By MS/MS	By MS/MS	By MS/MS	3.2	3.2	4.7	4.7	4.7	3.2	13587000	1447600	657290
CON__P01966	CON__P01966	5	5	3	>P01966 SWISS-PROT:P01966 (Bos taurus) Hemoglobin subunit alpha	1	5	5	3	4	4	4	4	4	5	4	4	4	4	4	5	2	2	3	2	2	3	51.4	51.4	33.8	15.184	142	142	0	By MS/MS	By matching	By MS/MS	By MS/MS	By MS/MS	By MS/MS	35.9	43.7	40.1	35.9	35.9	51.4	60043000	4136700	1732300
sp|P02768|ALBU_HUMAN;CON__P02768-1;tr|A0A0C4DGB6|A0A0C4DGB6_HUMAN;tr|H0YA55|H0YA55_HUMAN;tr|B7WNR0|B7WNR0_HUMAN;tr|D6RHD5|D6RHD5_HUMAN;tr|C9JKR2|C9JKR2_HUMAN;sp|P02768-2|ALBU_HUMAN;tr|A0A087WWT3|A0A087WWT3_HUMAN;sp|P02768-3|ALBU_HUMAN;tr|H7C013|H7C013_HUMAN	sp|P02768|ALBU_HUMAN;CON__P02768-1;tr|A0A0C4DGB6|A0A0C4DGB6_HUMAN;tr|H0YA55|H0YA55_HUMAN;tr|B7WNR0|B7WNR0_HUMAN;tr|D6RHD5|D6RHD5_HUMAN;tr|C9JKR2|C9JKR2_HUMAN;sp|P02768-2|ALBU_HUMAN;tr|A0A087WWT3|A0A087WWT3_HUMAN;sp|P02768-3|ALBU_HUMAN	90;90;85;69;69;67;56;56;50;50;26	90;90;85;69;69;67;56;56;50;50;26	85;85;80;64;66;64;53;53;47;47;24	>sp|P02768|ALBU_HUMAN Serum albumin OS=Homo sapiens OX=9606 GN=ALB PE=1 SV=2;>P02768-1 SWISS-PROT:P02768-1 Tax_Id=9606 Gene_Symbol=ALB Isoform 1 of Serum albumin precursor;>tr|A0A0C4DGB6|A0A0C4DGB6_HUMAN Serum albumin OS=Homo sapiens OX=9606 GN=ALB PE=1 SV	11	90	90	85	52	60	85	90	84	88	52	60	85	90	84	88	47	56	80	85	79	83	89.8	89.8	89.8	69.366	609	609;609;604;454;494;459;417;417;396;396;197	0	By MS/MS	By MS/MS	By MS/MS	By MS/MS	By MS/MS	By MS/MS	77.2	84.6	87.4	89.8	87.2	89.8	47623000000	1607100000	3569000000
CON__P02769	CON__P02769	72	67	67	>P02769 SWISS-PROT:P02769 (Bos taurus) Bovine serum albumin precursor	1	72	67	67	59	42	69	71	65	68	54	38	64	66	60	63	54	38	64	66	60	63	83.9	80.2	80.2	69.293	607	607	0	By MS/MS	By MS/MS	By MS/MS	By MS/MS	By MS/MS	By MS/MS	73.8	65.4	80.4	83.9	78.3	81.9	20958000000	2096700000	1380100000
sp|P05787|K2C8_HUMAN;CON__P05787;sp|P05787-2|K2C8_HUMAN;tr|F8VUG2|F8VUG2_HUMAN;CON__H-INV:HIT000292931;CON__Q9H552;tr|F8VP67|F8VP67_HUMAN;CON__REFSEQ:XP_092267;tr|F8W1U3|F8W1U3_HUMAN	sp|P05787|K2C8_HUMAN;CON__P05787;sp|P05787-2|K2C8_HUMAN;tr|F8VUG2|F8VUG2_HUMAN;CON__H-INV:HIT000292931	7;7;7;4;4;3;1;1;1	7;7;7;4;4;3;1;1;1	6;6;6;3;4;3;1;1;1	>sp|P05787|K2C8_HUMAN Keratin, type II cytoskeletal 8 OS=Homo sapiens OX=9606 GN=KRT8 PE=1 SV=7;>P05787 SWISS-PROT:P05787 Tax_Id=9606 Gene_Symbol=KRT8 Keratin, type II cytoskeletal 8;>sp|P05787-2|K2C8_HUMAN Isoform 2 of Keratin, type II cytoskeletal 8 OS=H	9	7	7	6	6	0	6	0	6	2	6	0	6	0	6	2	5	0	5	0	5	2	12.2	12.2	12.2	53.704	483	483;483;511;273;443;499;113;213;289	0	By MS/MS	By matching	By MS/MS	By matching	By MS/MS	By matching	10.1	0	10.1	0	12.2	3.7	29833000	9554500	0
sp|P08727|K1C19_HUMAN;CON__P08727;tr|C9JM50|C9JM50_HUMAN;CON__P19001	sp|P08727|K1C19_HUMAN;CON__P08727;tr|C9JM50|C9JM50_HUMAN;CON__P19001	6;6;4;4	4;4;2;2	2;2;1;0	>sp|P08727|K1C19_HUMAN Keratin, type I cytoskeletal 19 OS=Homo sapiens OX=9606 GN=KRT19 PE=1 SV=4;>P08727 SWISS-PROT:P08727 Tax_Id=9606 Gene_Symbol=KRT19 Keratin, type I cytoskeletal 19;>tr|C9JM50|C9JM50_HUMAN Keratin, type I cytoskeletal 19 (Fragment) OS=	4	6	4	2	6	3	6	2	4	3	4	1	4	1	2	1	2	0	2	0	1	0	15.5	11.5	5.2	44.105	400	400;400;196;403	0	By MS/MS	By MS/MS	By MS/MS	By matching	By MS/MS	By matching	15.5	6.2	15.5	4	8.5	6.2	10357000	3015900	534470
CON__P12763	CON__P12763	17	13	13	>P12763 SWISS-PROT:P12763 (Bos taurus) Alpha-2-HS-glycoprotein precursor	1	17	13	13	15	14	15	16	16	16	12	11	11	12	12	12	12	11	11	12	12	12	48.5	43.2	43.2	38.418	359	359	0	By MS/MS	By MS/MS	By MS/MS	By MS/MS	By MS/MS	By MS/MS	45.7	45.7	34	40.7	40.7	40.7	6561700000	831070000	508840000
sp|P13645|K1C10_HUMAN;CON__P13645;CON__P02535-1	sp|P13645|K1C10_HUMAN;CON__P13645	10;10;4	10;10;4	8;8;2	>sp|P13645|K1C10_HUMAN Keratin, type I cytoskeletal 10 OS=Homo sapiens OX=9606 GN=KRT10 PE=1 SV=6;>P13645 SWISS-PROT:P13645 Tax_Id=9606 Gene_Symbol=KRT10 Keratin, type I cytoskeletal 10	3	10	10	8	6	9	7	9	8	5	6	9	7	9	8	5	4	7	5	8	6	3	20.9	20.9	18.2	58.826	584	584;593;570	0	By MS/MS	By MS/MS	By MS/MS	By MS/MS	By MS/MS	By MS/MS	11.6	20.9	16.3	19.3	18.7	9.2	54793000	7623500	14256000
CON__P15497	CON__P15497	13	12	12	>P15497 SWISS-PROT:P15497 (Bos taurus) Apolipoprotein A-I precursor	1	13	12	12	11	11	13	13	13	11	10	10	12	12	12	10	10	10	12	12	12	10	57.4	51.3	51.3	30.276	265	265	0	By MS/MS	By MS/MS	By MS/MS	By MS/MS	By MS/MS	By MS/MS	46	46	57.4	57.4	57.4	46	275720000	18672000	19072000
CON__P28800	CON__P28800	4	3	3	>P28800 SWISS-PROT:P28800 (Bos taurus) Alpha-2-antiplasmin precursor	1	4	3	3	3	3	4	3	4	2	2	2	3	2	3	1	2	2	3	2	3	1	13.4	11.2	11.2	54.71	492	492	0	By MS/MS	By MS/MS	By MS/MS	By MS/MS	By MS/MS	By MS/MS	11.2	11.2	13.4	11.2	13.4	4.9	14147000	2925900	2009800
CON__P34955	CON__P34955	21	21	21	>P34955 SWISS-PROT:P34955 (Bos taurus) Alpha-1-antiproteinase precursor	1	21	21	21	17	16	19	18	20	18	17	16	19	18	20	18	17	16	19	18	20	18	42.3	42.3	42.3	46.103	416	416	0	By MS/MS	By MS/MS	By MS/MS	By MS/MS	By MS/MS	By MS/MS	37	35.8	38	38	40.6	38.2	1386800000	245560000	193200000
sp|P35527|K1C9_HUMAN;CON__P35527;tr|K7EQQ3|K7EQQ3_HUMAN	sp|P35527|K1C9_HUMAN;CON__P35527;tr|K7EQQ3|K7EQQ3_HUMAN	8;8;5	8;8;5	8;8;5	>sp|P35527|K1C9_HUMAN Keratin, type I cytoskeletal 9 OS=Homo sapiens OX=9606 GN=KRT9 PE=1 SV=3;>P35527 SWISS-PROT:P35527 Tax_Id=9606 Gene_Symbol=KRT9 Keratin, type I cytoskeletal 9;>tr|K7EQQ3|K7EQQ3_HUMAN Keratin, type I cytoskeletal 9 OS=Homo sapiens OX=9	3	8	8	8	6	7	6	6	3	5	6	7	6	6	3	5	6	7	6	6	3	5	21.7	21.7	21.7	62.064	623	623;623;390	0	By MS/MS	By MS/MS	By matching	By MS/MS	By MS/MS	By MS/MS	13.3	19.1	15.4	13.3	5.5	12.8	26985000	5758300	9352900
sp|P35908|K22E_HUMAN;CON__P35908;CON__Q3TTY5	sp|P35908|K22E_HUMAN;CON__P35908	5;5;1	4;4;1	3;3;1	>sp|P35908|K22E_HUMAN Keratin, type II cytoskeletal 2 epidermal OS=Homo sapiens OX=9606 GN=KRT2 PE=1 SV=2;>P35908 SWISS-PROT:P35908 Tax_Id=9606 Gene_Symbol=KRT2 Keratin, type II cytoskeletal 2 epidermal	3	5	4	3	5	5	4	4	5	4	4	4	3	3	4	3	3	3	2	2	3	3	10.5	8.6	6.7	65.432	639	639;645;707	0	By MS/MS	By MS/MS	By MS/MS	By MS/MS	By MS/MS	By matching	10.5	10.5	9.1	9.1	10.5	8.6	19766000	4057600	4822400
CON__P81644	CON__P81644	3	3	3	>P81644 SWISS-PROT:P81644 (Bos taurus) Apolipoprotein A-II precursor	1	3	3	3	2	2	2	3	3	3	2	2	2	3	3	3	2	2	2	3	3	3	27	27	27	11.202	100	100	0	By MS/MS	By MS/MS	By MS/MS	By MS/MS	By MS/MS	By MS/MS	11	11	11	27	27	27	70951000	2945900	3065600
CON__Q0IIK2;CON__Q29443;CON__Q2HJF0;sp|P02788-2|TRFL_HUMAN;tr|E7EQB2|E7EQB2_HUMAN;tr|E7ER44|E7ER44_HUMAN;sp|P02788|TRFL_HUMAN	CON__Q0IIK2;CON__Q29443	48;47;3;2;2;2;2	46;45;1;2;2;2;2	46;45;1;2;2;2;2	>Q0IIK2 TREMBL:Q0IIK2 (Bos taurus) Transferrin;>Q29443 SWISS-PROT:Q29443 Serotransferrin - Bos taurus (Bovine).	7	48	46	46	38	35	45	41	41	41	36	33	44	39	39	39	36	33	44	39	39	39	73.2	73.2	73.2	77.738	704	704;685;622;666;696;708;710	0	By MS/MS	By MS/MS	By MS/MS	By MS/MS	By MS/MS	By MS/MS	58	55.8	70.5	67.9	59.9	60.4	1388000000	238350000	143120000
CON__Q0V8M9	CON__Q0V8M9	4	1	1	>Q0V8M9 TREMBL:Q0V8M9;Q9TRI0 (Bos taurus) similar to inter-alpha (globulin) inhibitor H3 isoform 2	1	4	1	1	4	3	3	4	4	3	1	0	0	1	1	0	1	0	0	1	1	0	3.6	0.9	0.9	99.536	891	891	1	By matching	By matching	By matching	By matching	By MS/MS	By matching	3.6	2.7	2.7	3.6	3.6	2.7	0	0	0
CON__Q2KJF1	CON__Q2KJF1	7	6	6	>Q2KJF1 TREMBL:Q2KJF1 (Bos taurus) Alpha-1-B glycoprotein	1	7	6	6	7	6	6	5	6	7	6	5	5	4	5	6	6	5	5	4	5	6	19.1	17.7	17.7	53.553	503	503	0	By MS/MS	By MS/MS	By MS/MS	By MS/MS	By MS/MS	By MS/MS	19.1	16.1	16.9	11.9	16.9	19.1	53780000	9960100	4852000
CON__Q2UVX4	CON__Q2UVX4	15	6	6	>Q2UVX4 SWISS-PROT:Q2UVX4 (Bos taurus) Complement C3 precursor	1	15	6	6	14	12	13	11	13	10	5	5	5	4	4	4	5	5	5	4	4	4	10.2	5.9	5.9	187.37	1662	1662	0	By MS/MS	By matching	By MS/MS	By matching	By MS/MS	By MS/MS	9.5	9	8.8	7.3	8.6	7.2	23978000	4651300	2722900
CON__Q3MHN5;sp|P02774-2|VTDB_HUMAN;sp|P02774|VTDB_HUMAN;tr|D6RF35|D6RF35_HUMAN;sp|P02774-3|VTDB_HUMAN	CON__Q3MHN5	9;1;1;1;1	9;1;1;1;1	2;0;0;0;0	>Q3MHN5 SWISS-PROT:Q3MHN5 (Bos taurus) Vitamin D-binding protein precursor	5	9	9	2	7	5	9	8	8	8	7	5	9	8	8	8	2	2	2	2	1	2	25.5	25.5	4	53.341	474	474;352;474;476;493	0	By MS/MS	By MS/MS	By MS/MS	By MS/MS	By MS/MS	By MS/MS	17.7	13.3	25.5	23.2	23.8	23.2	153920000	22796000	13014000
CON__Q3SX09;tr|A8MUF7|A8MUF7_HUMAN;tr|F8W6P5|F8W6P5_HUMAN;tr|E9PEW8|E9PEW8_HUMAN;tr|A0A2R8Y7R2|A0A2R8Y7R2_HUMAN;tr|E9PFT6|E9PFT6_HUMAN;CON__P02070;sp|P69892|HBG2_HUMAN;sp|P69891|HBG1_HUMAN;sp|P68871|HBB_HUMAN;sp|P02100|HBE_HUMAN;sp|P02042|HBD_HUMAN;tr|A0A2R8Y7X9|A0A2R8Y7X9_HUMAN	CON__Q3SX09	6;1;1;1;1;1;1;1;1;1;1;1;1	6;1;1;1;1;1;1;1;1;1;1;1;1	6;1;1;1;1;1;1;1;1;1;1;1;1	>Q3SX09 TREMBL:Q3SX09 (Bos taurus) similar to HBG protein	13	6	6	6	5	5	6	5	4	4	5	5	6	5	4	4	5	5	6	5	4	4	33.3	33.3	33.3	22.06	201	201;87;90;104;111;141;145;147;147;147;147;147;168	0	By MS/MS	By MS/MS	By MS/MS	By MS/MS	By MS/MS	By MS/MS	28.4	28.4	33.3	33.3	25.4	28.4	70743000	6276400	4734600
sp|P07951-3|TPM2_HUMAN;tr|Q5TCU3|Q5TCU3_HUMAN;tr|A7XZE4|A7XZE4_HUMAN;sp|P07951-2|TPM2_HUMAN;sp|P07951|TPM2_HUMAN;CON__Q3SX28;tr|Q5TCU8|Q5TCU8_HUMAN	sp|P07951-3|TPM2_HUMAN;tr|Q5TCU3|Q5TCU3_HUMAN;tr|A7XZE4|A7XZE4_HUMAN;sp|P07951-2|TPM2_HUMAN;sp|P07951|TPM2_HUMAN;CON__Q3SX28;tr|Q5TCU8|Q5TCU8_HUMAN	4;4;4;4;4;4;4	1;1;1;1;1;1;1	1;1;1;1;1;1;1	>sp|P07951-3|TPM2_HUMAN Isoform 3 of Tropomyosin beta chain OS=Homo sapiens OX=9606 GN=TPM2;>tr|Q5TCU3|Q5TCU3_HUMAN Tropomyosin beta chain OS=Homo sapiens OX=9606 GN=TPM2 PE=1 SV=1;>tr|A7XZE4|A7XZE4_HUMAN Beta tropomyosin isoform OS=Homo sapiens OX=9606 GN	7	4	1	1	2	3	4	4	3	4	0	1	1	1	1	1	0	1	1	1	1	1	17.3	6.5	6.5	28.684	248	248;284;284;284;284;284;322	1	By matching	By matching	By matching	By matching	By MS/MS	By MS/MS	10.9	17.3	17.3	17.3	17.3	17.3	0	0	0
CON__Q3SZ57	CON__Q3SZ57	16	9	9	>Q3SZ57 SWISS-PROT:Q3SZ57 (Bos taurus) Alpha-fetoprotein precursor	1	16	9	9	15	12	14	15	15	14	8	8	8	9	8	8	8	8	8	9	8	8	28.4	21	21	68.587	610	610	0	By MS/MS	By MS/MS	By MS/MS	By MS/MS	By MS/MS	By MS/MS	25.2	23.6	24.1	28.2	26.2	26.2	92796000	15274000	10152000
CON__Q3SZR3	CON__Q3SZR3	4	4	4	>Q3SZR3 SWISS-PROT:Q3SZR3 (Bos taurus) Alpha-1-acid glycoprotein precursor	1	4	4	4	3	2	3	3	4	4	3	2	3	3	4	4	3	2	3	3	4	4	27.2	27.2	27.2	23.182	202	202	0	By MS/MS	By MS/MS	By MS/MS	By MS/MS	By MS/MS	By MS/MS	22.8	16.8	22.8	22.8	27.2	27.2	95291000	23485000	8546700
CON__Q3SZV7	CON__Q3SZV7	3	3	3	>Q3SZV7 TREMBL:Q3SZV7 (Bos taurus) Similar to hemopexin	1	3	3	3	3	1	3	3	3	3	3	1	3	3	3	3	3	1	3	3	3	3	6.3	6.3	6.3	52.295	460	460	0	By MS/MS	By matching	By MS/MS	By MS/MS	By MS/MS	By MS/MS	6.3	1.5	6.3	6.3	6.3	6.3	7974900	1901700	979640
CON__Q3T052	CON__Q3T052	6	6	6	>Q3T052 TREMBL:Q3T052;Q5EA67 (Bos taurus) Inter-alpha (Globulin) inhibitor H4	1	6	6	6	5	2	6	3	6	2	5	2	6	3	6	2	5	2	6	3	6	2	9.7	9.7	9.7	101.51	916	916	0	By MS/MS	By MS/MS	By MS/MS	By MS/MS	By MS/MS	By matching	8.6	2.2	9.7	5.8	9.7	2.2	18522000	3803700	1257100
CON__Q3Y5Z3	CON__Q3Y5Z3	3	3	3	>Q3Y5Z3 SWISS-PROT:Q3Y5Z3 (Bos taurus) Adiponectin precursor	1	3	3	3	3	3	3	3	3	2	3	3	3	3	3	2	3	3	3	3	3	2	14.2	14.2	14.2	26.133	240	240	0	By matching	By MS/MS	By MS/MS	By matching	By MS/MS	By matching	14.2	14.2	14.2	14.2	14.2	7.9	18026000	3616800	3031700
CON__Q58D62	CON__Q58D62	10	10	10	>Q58D62 SWISS-PROT:Q58D62 (Bos taurus) Fetuin-B precursor	1	10	10	10	9	7	8	9	9	8	9	7	8	9	9	8	9	7	8	9	9	8	33.1	33.1	33.1	42.663	387	387	0	By MS/MS	By MS/MS	By MS/MS	By MS/MS	By MS/MS	By MS/MS	24.8	21.2	26.6	30.2	28.7	29.5	120460000	23062000	12336000
CON__Q9TRI1	CON__Q9TRI1	19	9	9	>Q9TRI1 TREMBL:Q9TRI1 (Bos taurus) similar to inter-alpha-trypsin inhibitor heavy chain2	1	19	9	9	18	16	19	17	18	17	8	7	9	8	8	7	8	7	9	8	8	7	25.1	15.3	15.3	106.19	946	946	0	By MS/MS	By MS/MS	By MS/MS	By MS/MS	By MS/MS	By MS/MS	22.7	19	25.1	22.6	25.1	22.1	163120000	20668000	13215000
CON__REFSEQ:XP_001252647;CON__ENSEMBL:ENSBTAP00000038329	CON__REFSEQ:XP_001252647	4;1	4;1	2;1	>REFSEQ:XP_001252647 (Bos taurus) similar to endopin 2B	2	4	4	2	3	3	3	1	2	2	3	3	3	1	2	2	2	1	2	1	2	2	10.8	10.8	4.8	46.897	417	417;80	0	By MS/MS	By MS/MS	By MS/MS	By matching	By MS/MS	By matching	7	8.4	7	2.4	4.8	4.8	14671000	2286400	1861600
REV__tr|C9JZQ8|C9JZQ8_HUMAN;REV__sp|O94759-3|TRPM2_HUMAN;REV__sp|O94759-2|TRPM2_HUMAN;REV__sp|O94759|TRPM2_HUMAN;REV__tr|E9PGK7|E9PGK7_HUMAN	REV__tr|C9JZQ8|C9JZQ8_HUMAN;REV__sp|O94759-3|TRPM2_HUMAN;REV__sp|O94759-2|TRPM2_HUMAN;REV__sp|O94759|TRPM2_HUMAN;REV__tr|E9PGK7|E9PGK7_HUMAN	1;1;1;1;1	1;1;1;1;1	1;1;1;1;1	>tr|C9JZQ8|C9JZQ8_HUMAN Transient receptor potential cation channel subfamily M member 2 (Fragment) OS=Homo sapiens OX=9606 GN=TRPM2 PE=1 SV=8;>sp|O94759-3|TRPM2_HUMAN Isoform 3 of Transient receptor potential cation channel subfamily M member 2 OS=Homo sa	5	1	1	1	1	1	1	1	1	1	1	1	1	1	1	1	1	1	1	1	1	1	0	0	0	16.27	143	143;846;1449;1503;1553	0.009901	By matching	By MS/MS	By MS/MS	By MS/MS	By MS/MS	By MS/MS	0	0	0	0	0	0	0	0	0
REV__tr|C9JTC6|C9JTC6_HUMAN;REV__sp|Q32MZ4-3|LRRF1_HUMAN;REV__sp|Q32MZ4-2|LRRF1_HUMAN;REV__sp|Q32MZ4|LRRF1_HUMAN	REV__tr|C9JTC6|C9JTC6_HUMAN;REV__sp|Q32MZ4-3|LRRF1_HUMAN;REV__sp|Q32MZ4-2|LRRF1_HUMAN;REV__sp|Q32MZ4|LRRF1_HUMAN	1;1;1;1	1;1;1;1	1;1;1;1	>tr|C9JTC6|C9JTC6_HUMAN Leucine-rich repeat flightless-interacting protein 1 (Fragment) OS=Homo sapiens OX=9606 GN=LRRFIP1 PE=1 SV=1;>sp|Q32MZ4-3|LRRF1_HUMAN Isoform 3 of Leucine-rich repeat flightless-interacting protein 1 OS=Homo sapiens OX=9606 GN=LRRFI	4	1	1	1	1	1	1	1	1	1	1	1	1	1	1	1	1	1	1	1	1	1	0	0	0	16.418	149	149;752;784;808	1	By matching	By matching	By matching	By matching	By MS/MS	By matching	0	0	0	0	0	0	0	0	0
REV__sp|Q3T906|GNPTA_HUMAN	REV__sp|Q3T906|GNPTA_HUMAN	1	1	1	>sp|Q3T906|GNPTA_HUMAN N-acetylglucosamine-1-phosphotransferase subunits alpha/beta OS=Homo sapiens OX=9606 GN=GNPTAB PE=1 SV=1	1	1	1	1	0	0	0	1	1	1	0	0	0	1	1	1	0	0	0	1	1	1	0	0	0	143.62	1256	1256	1	By matching	By matching	By matching	By matching	By MS/MS	By matching	0	0	0	0	0	0	0	0	0
REV__tr|C9J8D0|C9J8D0_HUMAN;REV__tr|C9JA69|C9JA69_HUMAN;REV__sp|Q8WY36-2|BBX_HUMAN;REV__sp|Q8WY36|BBX_HUMAN	REV__tr|C9J8D0|C9J8D0_HUMAN;REV__tr|C9JA69|C9JA69_HUMAN;REV__sp|Q8WY36-2|BBX_HUMAN;REV__sp|Q8WY36|BBX_HUMAN	1;1;1;1	1;1;1;1	1;1;1;1	>tr|C9J8D0|C9J8D0_HUMAN HMG box transcription factor BBX (Fragment) OS=Homo sapiens OX=9606 GN=BBX PE=1 SV=1;>tr|C9JA69|C9JA69_HUMAN HMG box transcription factor BBX OS=Homo sapiens OX=9606 GN=BBX PE=1 SV=1;>sp|Q8WY36-2|BBX_HUMAN Isoform 2 of HMG box trans	4	1	1	1	1	1	1	1	1	1	1	1	1	1	1	1	1	1	1	1	1	1	0	0	0	50.656	448	448;891;911;941	1	By matching	By matching	By matching	By matching	By MS/MS	By matching	0	0	0	0	0	0	0	0	0
REV__sp|Q8WZ42-3|TITIN_HUMAN;REV__sp|Q8WZ42-10|TITIN_HUMAN;REV__tr|A0A0A0MRA3|A0A0A0MRA3_HUMAN;REV__sp|Q8WZ42-9|TITIN_HUMAN;REV__sp|Q8WZ42-5|TITIN_HUMAN;REV__sp|Q8WZ42-11|TITIN_HUMAN;REV__sp|Q8WZ42-4|TITIN_HUMAN;REV__sp|Q8WZ42-7|TITIN_HUMAN;REV__sp|Q8WZ42-2|TITIN_HUMAN;REV__sp|Q8WZ42|TITIN_HUMAN;REV__sp|Q8WZ42-8|TITIN_HUMAN;REV__sp|Q8WZ42-13|TITIN_HUMAN;REV__tr|A0A0A0MTS7|A0A0A0MTS7_HUMAN;REV__sp…	REV__sp|Q8WZ42-3|TITIN_HUMAN;REV__sp|Q8WZ42-10|TITIN_HUMAN;REV__tr|A0A0A0MRA3|A0A0A0MRA3_HUMAN;REV__sp|Q8WZ42-9|TITIN_HUMAN;REV__sp|Q8WZ42-5|TITIN_HUMAN;REV__sp|Q8WZ42-11|TITIN_HUMAN;REV__sp|Q8WZ42-4|TITIN_HUMAN;REV__sp|Q8WZ42-7|TITIN_HUMAN;REV__sp|Q8WZ42-2|TITIN_HUMAN;REV__sp|Q8WZ42|TITIN_HUMAN;REV__sp|Q8WZ42-8|TITIN_HUMAN;REV__sp|Q8WZ42-13|TITIN_HUMAN;REV__tr|A0A0A0MTS7|A0A0A0MTS7_HUMAN;REV__sp…	2;2;2;2;2;2;2;2;2;2;2;2;2;2;1	2;2;2;2;2;2;2;2;2;2;2;2;2;2;1	2;2;2;2;2;2;2;2;2;2;2;2;2;2;1	>sp|Q8WZ42-3|TITIN_HUMAN Isoform 3 of Titin OS=Homo sapiens OX=9606 GN=TTN;>sp|Q8WZ42-10|TITIN_HUMAN Isoform 10 of Titin OS=Homo sapiens OX=9606 GN=TTN;>tr|A0A0A0MRA3|A0A0A0MRA3_HUMAN Titin OS=Homo sapiens OX=9606 GN=TTN PE=1 SV=1;>sp|Q8WZ42-9|TITIN_HUMAN	15	2	2	2	2	1	1	1	0	0	2	1	1	1	0	0	2	1	1	1	0	0	0	0	0	2992.9	26926	26926;27051;27118;27118;32900;33423;33445;33615;34258;34350;34475;34484;35991;35991;5604	0.0038314	By MS/MS	By matching	By matching	By MS/MS	By matching	By matching	0	0	0	0	0	0	8190300	4084700	841660
REV__tr|D6RIB5|D6RIB5_HUMAN;REV__tr|H0Y9Q2|H0Y9Q2_HUMAN;REV__sp|Q9HBG6-11|IF122_HUMAN;REV__sp|Q9HBG6-7|IF122_HUMAN;REV__sp|Q9HBG6-10|IF122_HUMAN;REV__sp|Q9HBG6-8|IF122_HUMAN;REV__sp|Q9HBG6-9|IF122_HUMAN;REV__sp|Q9HBG6-4|IF122_HUMAN;REV__sp|Q9HBG6-3|IF122_HUMAN;REV__sp|Q9HBG6-6|IF122_HUMAN;REV__sp|Q9HBG6|IF122_HUMAN;REV__sp|Q9HBG6-5|IF122_HUMAN	REV__tr|D6RIB5|D6RIB5_HUMAN;REV__tr|H0Y9Q2|H0Y9Q2_HUMAN;REV__sp|Q9HBG6-11|IF122_HUMAN;REV__sp|Q9HBG6-7|IF122_HUMAN;REV__sp|Q9HBG6-10|IF122_HUMAN;REV__sp|Q9HBG6-8|IF122_HUMAN;REV__sp|Q9HBG6-9|IF122_HUMAN;REV__sp|Q9HBG6-4|IF122_HUMAN;REV__sp|Q9HBG6-3|IF122_HUMAN;REV__sp|Q9HBG6-6|IF122_HUMAN;REV__sp|Q9HBG6|IF122_HUMAN;REV__sp|Q9HBG6-5|IF122_HUMAN	1;1;1;1;1;1;1;1;1;1;1;1	1;1;1;1;1;1;1;1;1;1;1;1	1;1;1;1;1;1;1;1;1;1;1;1	>tr|D6RIB5|D6RIB5_HUMAN Intraflagellar transport protein 122 homolog (Fragment) OS=Homo sapiens OX=9606 GN=IFT122 PE=1 SV=8;>tr|H0Y9Q2|H0Y9Q2_HUMAN Intraflagellar transport protein 122 homolog (Fragment) OS=Homo sapiens OX=9606 GN=IFT122 PE=1 SV=1;>sp|Q9HB	12	1	1	1	0	0	1	0	1	1	0	0	1	0	1	1	0	0	1	0	1	1	0	0	0	19.784	171	171;380;993;1032;1082;1091;1118;1131;1182;1234;1241;1292	0.0068027	By matching	By matching	By MS/MS	By matching	By matching	By matching	0	0	0	0	0	0	6538400	0	0
REV__tr|B4DJ23|B4DJ23_HUMAN	REV__tr|B4DJ23|B4DJ23_HUMAN	1	1	1	>tr|B4DJ23|B4DJ23_HUMAN Myotubularin-related protein 14 OS=Homo sapiens OX=9606 GN=MTMR14 PE=1 SV=1	1	1	1	1	1	1	1	1	1	1	1	1	1	1	1	1	1	1	1	1	1	1	0	0	0	20.865	188	188	1	By matching	By MS/MS	By matching	By MS/MS	By matching	By matching	0	0	0	0	0	0	0	0	0
tr|Q49AN9|Q49AN9_HUMAN;tr|F5H013|F5H013_HUMAN;sp|P62308|RUXG_HUMAN;sp|A8MWD9|RUXGL_HUMAN	tr|Q49AN9|Q49AN9_HUMAN;tr|F5H013|F5H013_HUMAN;sp|P62308|RUXG_HUMAN;sp|A8MWD9|RUXGL_HUMAN	1;1;1;1	1;1;1;1	1;1;1;1	>tr|Q49AN9|Q49AN9_HUMAN SNRPG protein OS=Homo sapiens OX=9606 GN=SNRPG PE=1 SV=1;>tr|F5H013|F5H013_HUMAN Small nuclear ribonucleoprotein G OS=Homo sapiens OX=9606 GN=SNRPG PE=1 SV=1;>sp|P62308|RUXG_HUMAN Small nuclear ribonucleoprotein G OS=Homo sapiens OX	4	1	1	1	0	0	0	0	0	1	0	0	0	0	0	1	0	0	0	0	0	1	20.3	20.3	20.3	7.1013	64	64;68;76;76	1	By matching	By matching	By matching	By matching	By matching	By MS/MS	0	0	0	0	0	20.3	0	0	0
sp|B3EWG6|FM25G_HUMAN;sp|B3EWG5|FM25C_HUMAN;sp|B3EWG3|FM25A_HUMAN	sp|B3EWG6|FM25G_HUMAN;sp|B3EWG5|FM25C_HUMAN;sp|B3EWG3|FM25A_HUMAN	1;1;1	1;1;1	1;1;1	>sp|B3EWG6|FM25G_HUMAN Protein FAM25G OS=Homo sapiens OX=9606 GN=FAM25G PE=3 SV=1;>sp|B3EWG5|FM25C_HUMAN Protein FAM25C OS=Homo sapiens OX=9606 GN=FAM25C PE=3 SV=1;>sp|B3EWG3|FM25A_HUMAN Protein FAM25A OS=Homo sapiens OX=9606 GN=FAM25A PE=3 SV=1	3	1	1	1	0	0	1	0	0	0	0	0	1	0	0	0	0	0	1	0	0	0	7.9	7.9	7.9	9.3195	89	89;89;89	1	By matching	By matching	By MS/MS	By matching	By matching	By matching	0	0	7.9	0	0	0	0	0	0
sp|O00299|CLIC1_HUMAN	sp|O00299|CLIC1_HUMAN	2	2	2	>sp|O00299|CLIC1_HUMAN Chloride intracellular channel protein 1 OS=Homo sapiens OX=9606 GN=CLIC1 PE=1 SV=4	1	2	2	2	1	1	1	1	1	2	1	1	1	1	1	2	1	1	1	1	1	2	12.4	12.4	12.4	26.922	241	241	0	By MS/MS	By matching	By MS/MS	By MS/MS	By MS/MS	By MS/MS	7.5	7.5	7.5	7.5	7.5	12.4	13344000	2657900	251560
sp|O00468-6|AGRIN_HUMAN;sp|O00468-7|AGRIN_HUMAN;tr|A0A087X208|A0A087X208_HUMAN;sp|O00468-2|AGRIN_HUMAN;sp|O00468-3|AGRIN_HUMAN;sp|O00468-5|AGRIN_HUMAN;sp|O00468-4|AGRIN_HUMAN;sp|O00468|AGRIN_HUMAN;tr|H0Y5U1|H0Y5U1_HUMAN	sp|O00468-6|AGRIN_HUMAN;sp|O00468-7|AGRIN_HUMAN;tr|A0A087X208|A0A087X208_HUMAN;sp|O00468-2|AGRIN_HUMAN;sp|O00468-3|AGRIN_HUMAN;sp|O00468-5|AGRIN_HUMAN;sp|O00468-4|AGRIN_HUMAN;sp|O00468|AGRIN_HUMAN	10;10;9;9;9;9;9;9;3	10;10;9;9;9;9;9;9;3	10;10;9;9;9;9;9;9;3	>sp|O00468-6|AGRIN_HUMAN Isoform 6 of Agrin OS=Homo sapiens OX=9606 GN=AGRN;>sp|O00468-7|AGRIN_HUMAN Isoform 7 of Agrin OS=Homo sapiens OX=9606 GN=AGRN;>tr|A0A087X208|A0A087X208_HUMAN Agrin OS=Homo sapiens OX=9606 GN=AGRN PE=1 SV=1;>sp|O00468-2|AGRIN_HUMAN	9	10	10	10	4	2	10	2	10	1	4	2	10	2	10	1	4	2	10	2	10	1	7.4	7.4	7.4	214.84	2045	2045;2063;1930;1963;2049;2057;2059;2067;287	0	By MS/MS	By matching	By MS/MS	By matching	By MS/MS	By matching	3.2	1.2	7.4	1.2	7.4	0.6	37732000	2378200	451990
tr|D6REQ6|D6REQ6_HUMAN;tr|D6RHI9|D6RHI9_HUMAN;sp|O00584|RNT2_HUMAN;tr|A0A087WZM2|A0A087WZM2_HUMAN;tr|H0YAE9|H0YAE9_HUMAN	tr|D6REQ6|D6REQ6_HUMAN;tr|D6RHI9|D6RHI9_HUMAN;sp|O00584|RNT2_HUMAN;tr|A0A087WZM2|A0A087WZM2_HUMAN;tr|H0YAE9|H0YAE9_HUMAN	2;2;2;2;1	2;2;2;2;1	2;2;2;2;1	>tr|D6REQ6|D6REQ6_HUMAN Ribonuclease T2, isoform CRA_c OS=Homo sapiens OX=9606 GN=RNASET2 PE=1 SV=1;>tr|D6RHI9|D6RHI9_HUMAN Ribonuclease T2 (Fragment) OS=Homo sapiens OX=9606 GN=RNASET2 PE=1 SV=8;>sp|O00584|RNT2_HUMAN Ribonuclease T2 OS=Homo sapiens OX=960	5	2	2	2	1	1	2	2	1	1	1	1	2	2	1	1	1	1	2	2	1	1	14.7	14.7	14.7	25.308	218	218;253;256;306;185	0	By matching	By MS/MS	By MS/MS	By matching	By matching	By matching	7.3	7.3	14.7	14.7	7.3	7.3	6311800	483880	450400
sp|O14818|PSA7_HUMAN;sp|O14818-2|PSA7_HUMAN;sp|Q8TAA3-2|PSMA8_HUMAN;sp|Q8TAA3-5|PSMA8_HUMAN;sp|Q8TAA3|PSMA8_HUMAN;sp|O14818-4|PSA7_HUMAN;tr|H0Y586|H0Y586_HUMAN;tr|A0A087WYS6|A0A087WYS6_HUMAN;tr|F5GY34|F5GY34_HUMAN	sp|O14818|PSA7_HUMAN;sp|O14818-2|PSA7_HUMAN;sp|Q8TAA3-2|PSMA8_HUMAN;sp|Q8TAA3-5|PSMA8_HUMAN;sp|Q8TAA3|PSMA8_HUMAN;sp|O14818-4|PSA7_HUMAN;tr|H0Y586|H0Y586_HUMAN;tr|A0A087WYS6|A0A087WYS6_HUMAN	4;3;3;3;3;2;2;2;1	4;3;3;3;3;2;2;2;1	4;3;3;3;3;2;2;2;1	>sp|O14818|PSA7_HUMAN Proteasome subunit alpha type-7 OS=Homo sapiens OX=9606 GN=PSMA7 PE=1 SV=1;>sp|O14818-2|PSA7_HUMAN Isoform 2 of Proteasome subunit alpha type-7 OS=Homo sapiens OX=9606 GN=PSMA7;>sp|Q8TAA3-2|PSMA8_HUMAN Isoform 2 of Proteasome subunit	9	4	4	4	3	2	4	2	4	4	3	2	4	2	4	4	3	2	4	2	4	4	22.2	22.2	22.2	27.887	248	248;178;212;250;256;149;187;224;63	0	By MS/MS	By matching	By MS/MS	By matching	By MS/MS	By MS/MS	19	8.9	22.2	8.9	22.2	22.2	22617000	4218200	730930
tr|F8VR50|F8VR50_HUMAN;tr|C9JZD1|C9JZD1_HUMAN;sp|O15145|ARPC3_HUMAN	tr|F8VR50|F8VR50_HUMAN;tr|C9JZD1|C9JZD1_HUMAN;sp|O15145|ARPC3_HUMAN	1;1;1	1;1;1	1;1;1	>tr|F8VR50|F8VR50_HUMAN Actin-related protein 2/3 complex subunit 3 (Fragment) OS=Homo sapiens OX=9606 GN=ARPC3 PE=1 SV=1;>tr|C9JZD1|C9JZD1_HUMAN Actin-related protein 2/3 complex subunit 3 (Fragment) OS=Homo sapiens OX=9606 GN=ARPC3 PE=1 SV=1;>sp|O15145|A	3	1	1	1	1	0	1	1	1	1	1	0	1	1	1	1	1	0	1	1	1	1	13.1	13.1	13.1	9.7261	84	84;99;178	1	By MS/MS	By matching	By matching	By matching	By matching	By matching	13.1	0	13.1	13.1	13.1	13.1	0	0	0
sp|O15232-2|MATN3_HUMAN;sp|O15232|MATN3_HUMAN	sp|O15232-2|MATN3_HUMAN;sp|O15232|MATN3_HUMAN	3;3	3;3	3;3	>sp|O15232-2|MATN3_HUMAN Isoform 2 of Matrilin-3 OS=Homo sapiens OX=9606 GN=MATN3;>sp|O15232|MATN3_HUMAN Matrilin-3 OS=Homo sapiens OX=9606 GN=MATN3 PE=1 SV=2	2	3	3	3	3	3	3	3	1	1	3	3	3	3	1	1	3	3	3	3	1	1	12.8	12.8	12.8	48.316	444	444;486	0	By MS/MS	By MS/MS	By MS/MS	By MS/MS	By matching	By matching	12.8	12.8	12.8	12.8	4.5	4.5	23434000	9885500	2082000
sp|O43505|B4GA1_HUMAN	sp|O43505|B4GA1_HUMAN	1	1	1	>sp|O43505|B4GA1_HUMAN Beta-1,4-glucuronyltransferase 1 OS=Homo sapiens OX=9606 GN=B4GAT1 PE=1 SV=1	1	1	1	1	0	0	1	0	0	0	0	0	1	0	0	0	0	0	1	0	0	0	3.9	3.9	3.9	47.119	415	415	0.003663	By matching	By matching	By MS/MS	By matching	By matching	By matching	0	0	3.9	0	0	0	0	0	0
sp|O43707|ACTN4_HUMAN;sp|O43707-2|ACTN4_HUMAN;tr|F5GXS2|F5GXS2_HUMAN;sp|O43707-3|ACTN4_HUMAN;tr|H7C144|H7C144_HUMAN;tr|K7EJH8|K7EJH8_HUMAN;tr|H0YJW3|H0YJW3_HUMAN;sp|Q08043|ACTN3_HUMAN;tr|H0YJ11|H0YJ11_HUMAN;tr|H7C5W8|H7C5W8_HUMAN;sp|P35609-2|ACTN2_HUMAN;sp|P35609|ACTN2_HUMAN;tr|A0A087WSZ2|A0A087WSZ2_HUMAN;tr|G3V2E8|G3V2E8_HUMAN;tr|K7EP19|K7EP19_HUMAN;tr|G3V5M4|G3V5M4_HUMAN;tr|F6THM6|F6THM6_HUMAN;…	sp|O43707|ACTN4_HUMAN;sp|O43707-2|ACTN4_HUMAN;tr|F5GXS2|F5GXS2_HUMAN;sp|O43707-3|ACTN4_HUMAN	25;16;13;13;11;6;3;3;2;2;2;2;2;1;1;1;1;1;1;1;1;1	25;16;13;13;11;6;3;3;2;2;2;2;2;1;1;1;1;1;1;1;1;1	17;11;9;9;8;4;0;0;0;0;0;0;0;0;0;0;0;1;1;1;1;1	>sp|O43707|ACTN4_HUMAN Alpha-actinin-4 OS=Homo sapiens OX=9606 GN=ACTN4 PE=1 SV=2;>sp|O43707-2|ACTN4_HUMAN Isoform ACTN4ISO of Alpha-actinin-4 OS=Homo sapiens OX=9606 GN=ACTN4;>tr|F5GXS2|F5GXS2_HUMAN Alpha-actinin-4 OS=Homo sapiens OX=9606 GN=ACTN4 PE=1 SV	22	25	25	17	24	17	21	18	24	20	24	17	21	18	24	20	16	12	14	12	16	14	34.5	34.5	23.7	104.85	911	911;692;521;521;342;182;251;901;207;297;894;894;944;85;105;126;686;1309;2002;2154;2564;2564	0	By MS/MS	By MS/MS	By MS/MS	By MS/MS	By MS/MS	By MS/MS	33.6	24	29.4	24.4	32.6	27.4	249840000	46460000	13995000
sp|O60566-2|BUB1B_HUMAN;sp|O60566|BUB1B_HUMAN;sp|O60566-3|BUB1B_HUMAN	sp|O60566-2|BUB1B_HUMAN;sp|O60566|BUB1B_HUMAN;sp|O60566-3|BUB1B_HUMAN	1;1;1	1;1;1	1;1;1	>sp|O60566-2|BUB1B_HUMAN Isoform 2 of Mitotic checkpoint serine/threonine-protein kinase BUB1 beta OS=Homo sapiens OX=9606 GN=BUB1B;>sp|O60566|BUB1B_HUMAN Mitotic checkpoint serine/threonine-protein kinase BUB1 beta OS=Homo sapiens OX=9606 GN=BUB1B PE=1 SV	3	1	1	1	1	1	0	1	0	0	1	1	0	1	0	0	1	1	0	1	0	0	1	1	1	105.89	933	933;1050;1064	1	By matching	By MS/MS	By matching	By matching	By matching	By matching	1	1	0	1	0	0	0	0	0
sp|O60701-2|UGDH_HUMAN;sp|O60701|UGDH_HUMAN;tr|E7ER95|E7ER95_HUMAN;tr|E7ER83|E7ER83_HUMAN;tr|E7ETF4|E7ETF4_HUMAN;tr|E7EV97|E7EV97_HUMAN;sp|O60701-3|UGDH_HUMAN;tr|D6RHF4|D6RHF4_HUMAN;tr|E9PBD2|E9PBD2_HUMAN	sp|O60701-2|UGDH_HUMAN;sp|O60701|UGDH_HUMAN;tr|E7ER95|E7ER95_HUMAN;tr|E7ER83|E7ER83_HUMAN;tr|E7ETF4|E7ETF4_HUMAN;tr|E7EV97|E7EV97_HUMAN;sp|O60701-3|UGDH_HUMAN	4;4;2;2;2;2;2;1;1	4;4;2;2;2;2;2;1;1	4;4;2;2;2;2;2;1;1	>sp|O60701-2|UGDH_HUMAN Isoform 2 of UDP-glucose 6-dehydrogenase OS=Homo sapiens OX=9606 GN=UGDH;>sp|O60701|UGDH_HUMAN UDP-glucose 6-dehydrogenase OS=Homo sapiens OX=9606 GN=UGDH PE=1 SV=1;>tr|E7ER95|E7ER95_HUMAN UDP-glucose 6-dehydrogenase (Fragment) OS=H	9	4	4	4	2	0	2	1	3	3	2	0	2	1	3	3	2	0	2	1	3	3	14.1	14.1	14.1	47.602	427	427;494;84;130;153;181;397;53;55	0	By MS/MS	By matching	By MS/MS	By matching	By MS/MS	By MS/MS	7	0	7.7	4	11	11.7	17149000	3601200	0
sp|Q99880|H2B1L_HUMAN;sp|Q99879|H2B1M_HUMAN;sp|Q99877|H2B1N_HUMAN;sp|Q93079|H2B1H_HUMAN;sp|Q8N257|H2B3B_HUMAN;sp|Q5QNW6|H2B2F_HUMAN;sp|Q16778|H2B2E_HUMAN;sp|P62807|H2B1C_HUMAN;sp|P58876|H2B1D_HUMAN;sp|P57053|H2BFS_HUMAN;sp|P33778|H2B1B_HUMAN;sp|P23527|H2B1O_HUMAN;sp|P06899|H2B1J_HUMAN;sp|O60814|H2B1K_HUMAN;sp|Q5QNW6-2|H2B2F_HUMAN;tr|U3KQK0|U3KQK0_HUMAN;sp|Q96A08|H2B1A_HUMAN;tr|A0A2R8Y619|A0A2R8Y6…	sp|Q99880|H2B1L_HUMAN;sp|Q99879|H2B1M_HUMAN;sp|Q99877|H2B1N_HUMAN;sp|Q93079|H2B1H_HUMAN;sp|Q8N257|H2B3B_HUMAN;sp|Q5QNW6|H2B2F_HUMAN;sp|Q16778|H2B2E_HUMAN;sp|P62807|H2B1C_HUMAN;sp|P58876|H2B1D_HUMAN;sp|P57053|H2BFS_HUMAN;sp|P33778|H2B1B_HUMAN;sp|P23527|H2B1O_HUMAN;sp|P06899|H2B1J_HUMAN;sp|O60814|H2B1K_HUMAN;sp|Q5QNW6-2|H2B2F_HUMAN;tr|U3KQK0|U3KQK0_HUMAN;sp|Q96A08|H2B1A_HUMAN	3;3;3;3;3;3;3;3;3;3;3;3;3;3;3;3;2;1	3;3;3;3;3;3;3;3;3;3;3;3;3;3;3;3;2;1	3;3;3;3;3;3;3;3;3;3;3;3;3;3;3;3;2;1	>sp|Q99880|H2B1L_HUMAN Histone H2B type 1-L OS=Homo sapiens OX=9606 GN=HIST1H2BL PE=1 SV=3;>sp|Q99879|H2B1M_HUMAN Histone H2B type 1-M OS=Homo sapiens OX=9606 GN=HIST1H2BM PE=1 SV=3;>sp|Q99877|H2B1N_HUMAN Histone H2B type 1-N OS=Homo sapiens OX=9606 GN=HIS	18	3	3	3	2	1	3	1	3	2	2	1	3	1	3	2	2	1	3	1	3	2	27.8	27.8	27.8	13.952	126	126;126;126;126;126;126;126;126;126;126;126;126;126;126;134;166;127;122	0	By MS/MS	By MS/MS	By MS/MS	By MS/MS	By MS/MS	By MS/MS	20.6	11.9	27.8	11.9	27.8	19	73934000	117860	0
sp|O60888-3|CUTA_HUMAN;sp|O60888|CUTA_HUMAN;sp|O60888-2|CUTA_HUMAN;tr|C9IZG4|C9IZG4_HUMAN;tr|C9IZQ5|C9IZQ5_HUMAN	sp|O60888-3|CUTA_HUMAN;sp|O60888|CUTA_HUMAN;sp|O60888-2|CUTA_HUMAN;tr|C9IZG4|C9IZG4_HUMAN;tr|C9IZQ5|C9IZQ5_HUMAN	2;2;2;1;1	2;2;2;1;1	2;2;2;1;1	>sp|O60888-3|CUTA_HUMAN Isoform C of Protein CutA OS=Homo sapiens OX=9606 GN=CUTA;>sp|O60888|CUTA_HUMAN Protein CutA OS=Homo sapiens OX=9606 GN=CUTA PE=1 SV=2;>sp|O60888-2|CUTA_HUMAN Isoform A of Protein CutA OS=Homo sapiens OX=9606 GN=CUTA;>tr|C9IZG4|C9IZ	5	2	2	2	0	0	2	1	1	1	0	0	2	1	1	1	0	0	2	1	1	1	28.8	28.8	28.8	16.832	156	156;179;198;135;155	0	By matching	By matching	By MS/MS	By MS/MS	By MS/MS	By MS/MS	0	0	28.8	17.3	11.5	17.3	2166800	0	0
sp|O75369-5|FLNB_HUMAN;sp|O75369-4|FLNB_HUMAN;tr|E7EN95|E7EN95_HUMAN;sp|O75369-7|FLNB_HUMAN;sp|O75369-6|FLNB_HUMAN;sp|O75369-3|FLNB_HUMAN;sp|O75369-2|FLNB_HUMAN;sp|O75369-9|FLNB_HUMAN;sp|O75369|FLNB_HUMAN;sp|O75369-8|FLNB_HUMAN	sp|O75369-5|FLNB_HUMAN;sp|O75369-4|FLNB_HUMAN;tr|E7EN95|E7EN95_HUMAN;sp|O75369-7|FLNB_HUMAN;sp|O75369-6|FLNB_HUMAN;sp|O75369-3|FLNB_HUMAN;sp|O75369-2|FLNB_HUMAN;sp|O75369-9|FLNB_HUMAN;sp|O75369|FLNB_HUMAN;sp|O75369-8|FLNB_HUMAN	2;2;2;2;2;2;2;2;2;2	2;2;2;2;2;2;2;2;2;2	2;2;2;2;2;2;2;2;2;2	>sp|O75369-5|FLNB_HUMAN Isoform 5 of Filamin-B OS=Homo sapiens OX=9606 GN=FLNB;>sp|O75369-4|FLNB_HUMAN Isoform 4 of Filamin-B OS=Homo sapiens OX=9606 GN=FLNB;>tr|E7EN95|E7EN95_HUMAN Filamin-B OS=Homo sapiens OX=9606 GN=FLNB PE=1 SV=1;>sp|O75369-7|FLNB_HUMA	10	2	2	2	2	1	2	2	2	2	2	1	2	2	2	2	2	1	2	2	2	2	1.2	1.2	1.2	230.29	2146	2146;2150;2409;2422;2537;2561;2578;2591;2602;2633	0	By MS/MS	By matching	By matching	By matching	By matching	By MS/MS	1.2	0.7	1.2	1.2	1.2	1.2	6754900	922020	266580
tr|M0QZL6|M0QZL6_HUMAN;sp|O75462|CRLF1_HUMAN	tr|M0QZL6|M0QZL6_HUMAN;sp|O75462|CRLF1_HUMAN	2;2	2;2	2;2	>tr|M0QZL6|M0QZL6_HUMAN Cytokine receptor-like factor 1 (Fragment) OS=Homo sapiens OX=9606 GN=CRLF1 PE=1 SV=1;>sp|O75462|CRLF1_HUMAN Cytokine receptor-like factor 1 OS=Homo sapiens OX=9606 GN=CRLF1 PE=1 SV=1	2	2	2	2	2	1	2	1	1	0	2	1	2	1	1	0	2	1	2	1	1	0	16.2	16.2	16.2	19.009	173	173;422	0	By MS/MS	By MS/MS	By MS/MS	By MS/MS	By matching	By matching	16.2	6.4	16.2	6.4	6.4	0	13044000	3990600	2263500
sp|O75874|IDHC_HUMAN;tr|C9J4N6|C9J4N6_HUMAN;tr|C9JJE5|C9JJE5_HUMAN;tr|C9JLU6|C9JLU6_HUMAN;sp|P48735-2|IDHP_HUMAN;sp|P48735|IDHP_HUMAN	sp|O75874|IDHC_HUMAN	13;5;3;3;1;1	13;5;3;3;1;1	13;5;3;3;1;1	>sp|O75874|IDHC_HUMAN Isocitrate dehydrogenase [NADP] cytoplasmic OS=Homo sapiens OX=9606 GN=IDH1 PE=1 SV=2	6	13	13	13	13	8	13	10	10	10	13	8	13	10	10	10	13	8	13	10	10	10	41.5	41.5	41.5	46.659	414	414;157;62;73;400;452	0	By MS/MS	By MS/MS	By MS/MS	By MS/MS	By MS/MS	By MS/MS	41.5	23.9	41.5	32.9	31.4	30.9	81321000	24944000	2173800
sp|O75882-3|ATRN_HUMAN;sp|O75882-2|ATRN_HUMAN;sp|O75882|ATRN_HUMAN	sp|O75882-3|ATRN_HUMAN;sp|O75882-2|ATRN_HUMAN;sp|O75882|ATRN_HUMAN	3;3;3	3;3;3	3;3;3	>sp|O75882-3|ATRN_HUMAN Isoform 3 of Attractin OS=Homo sapiens OX=9606 GN=ATRN;>sp|O75882-2|ATRN_HUMAN Isoform 2 of Attractin OS=Homo sapiens OX=9606 GN=ATRN;>sp|O75882|ATRN_HUMAN Attractin OS=Homo sapiens OX=9606 GN=ATRN PE=1 SV=2	3	3	3	3	3	3	3	2	3	1	3	3	3	2	3	1	3	3	3	2	3	1	3.3	3.3	3.3	133.7	1198	1198;1272;1429	0	By matching	By matching	By MS/MS	By matching	By MS/MS	By matching	3.3	3.3	3.3	2.2	3.3	0.8	13268000	1318700	2057500
sp|O94907|DKK1_HUMAN;tr|D6RGF1|D6RGF1_HUMAN;tr|D6RCC2|D6RCC2_HUMAN;sp|Q9UBU2|DKK2_HUMAN	sp|O94907|DKK1_HUMAN	3;1;1;1	3;1;1;1	3;1;1;1	>sp|O94907|DKK1_HUMAN Dickkopf-related protein 1 OS=Homo sapiens OX=9606 GN=DKK1 PE=1 SV=1	4	3	3	3	0	0	2	0	3	0	0	0	2	0	3	0	0	0	2	0	3	0	10.9	10.9	10.9	28.671	266	266;159;213;259	0	By matching	By matching	By matching	By matching	By MS/MS	By matching	0	0	7.5	0	10.9	0	11799000	0	0
sp|O94985-2|CSTN1_HUMAN;sp|O94985|CSTN1_HUMAN;tr|Q5SR54|Q5SR54_HUMAN	sp|O94985-2|CSTN1_HUMAN;sp|O94985|CSTN1_HUMAN;tr|Q5SR54|Q5SR54_HUMAN	13;12;10	13;12;10	13;12;10	>sp|O94985-2|CSTN1_HUMAN Isoform 2 of Calsyntenin-1 OS=Homo sapiens OX=9606 GN=CLSTN1;>sp|O94985|CSTN1_HUMAN Calsyntenin-1 OS=Homo sapiens OX=9606 GN=CLSTN1 PE=1 SV=1;>tr|Q5SR54|Q5SR54_HUMAN Calsyntenin-1 (Fragment) OS=Homo sapiens OX=9606 GN=CLSTN1 PE=1 S	3	13	13	13	8	3	12	6	10	6	8	3	12	6	10	6	8	3	12	6	10	6	20.2	20.2	20.2	108.64	971	971;981;782	0	By MS/MS	By MS/MS	By MS/MS	By matching	By MS/MS	By MS/MS	9.2	3.4	18	8.2	12.5	7.8	81383000	6157200	1449600
tr|A0A1W2PQW2|A0A1W2PQW2_HUMAN;tr|A0A1W2PR14|A0A1W2PR14_HUMAN;sp|O95180-2|CAC1H_HUMAN;sp|O95180|CAC1H_HUMAN	tr|A0A1W2PQW2|A0A1W2PQW2_HUMAN;tr|A0A1W2PR14|A0A1W2PR14_HUMAN;sp|O95180-2|CAC1H_HUMAN;sp|O95180|CAC1H_HUMAN	1;1;1;1	1;1;1;1	1;1;1;1	>tr|A0A1W2PQW2|A0A1W2PQW2_HUMAN Voltage-dependent T-type calcium channel subunit alpha-1H OS=Homo sapiens OX=9606 GN=CACNA1H PE=4 SV=1;>tr|A0A1W2PR14|A0A1W2PR14_HUMAN Voltage-dependent T-type calcium channel subunit alpha-1H OS=Homo sapiens OX=9606 GN=CACN	4	1	1	1	1	1	1	1	1	1	1	1	1	1	1	1	1	1	1	1	1	1	0.9	0.9	0.9	178.54	1618	1618;2340;2347;2353	1	By matching	By MS/MS	By MS/MS	By MS/MS	By matching	By MS/MS	0.9	0.9	0.9	0.9	0.9	0.9	0	0	0
sp|O95445-2|APOM_HUMAN;sp|O95445|APOM_HUMAN;tr|Q5SRP5|Q5SRP5_HUMAN	sp|O95445-2|APOM_HUMAN;sp|O95445|APOM_HUMAN;tr|Q5SRP5|Q5SRP5_HUMAN	5;5;4	5;5;4	5;5;4	>sp|O95445-2|APOM_HUMAN Isoform 2 of Apolipoprotein M OS=Homo sapiens OX=9606 GN=APOM;>sp|O95445|APOM_HUMAN Apolipoprotein M OS=Homo sapiens OX=9606 GN=APOM PE=1 SV=2;>tr|Q5SRP5|Q5SRP5_HUMAN Apolipoprotein M OS=Homo sapiens OX=9606 GN=APOM PE=1 SV=1	3	5	5	5	2	2	4	4	4	5	2	2	4	4	4	5	2	2	4	4	4	5	34.5	34.5	34.5	13.051	116	116;188;129	0	By MS/MS	By matching	By MS/MS	By MS/MS	By MS/MS	By MS/MS	17.2	17.2	33.6	33.6	33.6	34.5	105460000	7041100	1813700
sp|O95461-2|LARG1_HUMAN;sp|O95461|LARG1_HUMAN;tr|B0QY08|B0QY08_HUMAN	sp|O95461-2|LARG1_HUMAN;sp|O95461|LARG1_HUMAN;tr|B0QY08|B0QY08_HUMAN	2;2;1	2;2;1	2;2;1	>sp|O95461-2|LARG1_HUMAN Isoform 2 of LARGE xylosyl- and glucuronyltransferase 1 OS=Homo sapiens OX=9606 GN=LARGE1;>sp|O95461|LARG1_HUMAN LARGE xylosyl- and glucuronyltransferase 1 OS=Homo sapiens OX=9606 GN=LARGE1 PE=1 SV=1;>tr|B0QY08|B0QY08_HUMAN LARGE x	3	2	2	2	1	1	0	1	0	1	1	1	0	1	0	1	1	1	0	1	0	1	2.4	2.4	2.4	81.845	704	704;756;187	0.0037313	By matching	By MS/MS	By matching	By MS/MS	By matching	By matching	1.1	1.1	0	1.3	0	1.1	1829300	0	0
sp|P00338|LDHA_HUMAN;sp|P00338-3|LDHA_HUMAN;sp|P00338-5|LDHA_HUMAN;sp|P00338-2|LDHA_HUMAN;sp|P00338-4|LDHA_HUMAN;tr|F5GXY2|F5GXY2_HUMAN;tr|F5GYU2|F5GYU2_HUMAN;tr|F5GXH2|F5GXH2_HUMAN;tr|F5H5J4|F5H5J4_HUMAN;tr|F5H6W8|F5H6W8_HUMAN;tr|A8MW50|A8MW50_HUMAN;tr|A0A087WUM2|A0A087WUM2_HUMAN;sp|Q6ZMR3|LDH6A_HUMAN;sp|P07195|LDHB_HUMAN	sp|P00338|LDHA_HUMAN;sp|P00338-3|LDHA_HUMAN;sp|P00338-5|LDHA_HUMAN;sp|P00338-2|LDHA_HUMAN;sp|P00338-4|LDHA_HUMAN	9;9;6;6;6;4;3;2;1;1;1;1;1;1	9;9;6;6;6;4;3;2;1;1;1;1;1;1	8;8;5;5;5;4;3;2;1;1;0;0;0;0	>sp|P00338|LDHA_HUMAN L-lactate dehydrogenase A chain OS=Homo sapiens OX=9606 GN=LDHA PE=1 SV=2;>sp|P00338-3|LDHA_HUMAN Isoform 3 of L-lactate dehydrogenase A chain OS=Homo sapiens OX=9606 GN=LDHA;>sp|P00338-5|LDHA_HUMAN Isoform 5 of L-lactate dehydrogenas	14	9	9	8	9	7	7	8	8	5	9	7	7	8	8	5	8	7	6	7	7	4	32.8	32.8	29.2	36.688	332	332;361;241;274;274;156;144;114;89;94;232;233;332;334	0	By MS/MS	By MS/MS	By MS/MS	By MS/MS	By MS/MS	By MS/MS	32.8	26.2	24.7	28	28	17.2	198320000	70559000	8923000
sp|P00352|AL1A1_HUMAN;tr|Q5SYQ7|Q5SYQ7_HUMAN;tr|Q5SYQ9|Q5SYQ9_HUMAN;tr|Q5SYQ8|Q5SYQ8_HUMAN	sp|P00352|AL1A1_HUMAN	11;3;3;3	11;3;3;3	11;3;3;3	>sp|P00352|AL1A1_HUMAN Retinal dehydrogenase 1 OS=Homo sapiens OX=9606 GN=ALDH1A1 PE=1 SV=2	4	11	11	11	9	8	10	9	11	10	9	8	10	9	11	10	9	8	10	9	11	10	26.3	26.3	26.3	54.861	501	501;203;230;238	0	By MS/MS	By MS/MS	By MS/MS	By MS/MS	By MS/MS	By MS/MS	21.2	19.2	23.8	21.4	26.3	23.4	78906000	12204000	3236300
sp|P00367|DHE3_HUMAN;sp|P00367-3|DHE3_HUMAN;sp|P49448|DHE4_HUMAN;sp|P00367-2|DHE3_HUMAN	sp|P00367|DHE3_HUMAN;sp|P00367-3|DHE3_HUMAN;sp|P49448|DHE4_HUMAN;sp|P00367-2|DHE3_HUMAN	15;10;9;8	15;10;9;8	15;10;9;8	>sp|P00367|DHE3_HUMAN Glutamate dehydrogenase 1, mitochondrial OS=Homo sapiens OX=9606 GN=GLUD1 PE=1 SV=2;>sp|P00367-3|DHE3_HUMAN Isoform 3 of Glutamate dehydrogenase 1, mitochondrial OS=Homo sapiens OX=9606 GN=GLUD1;>sp|P49448|DHE4_HUMAN Glutamate dehydro	4	15	15	15	13	3	13	5	15	14	13	3	13	5	15	14	13	3	13	5	15	14	35.1	35.1	35.1	61.397	558	558;425;558;391	0	By MS/MS	By matching	By MS/MS	By matching	By MS/MS	By MS/MS	28.1	8.6	33.9	11.8	35.1	33.2	154890000	18230000	1449200
sp|P00390-5|GSHR_HUMAN;sp|P00390-4|GSHR_HUMAN;sp|P00390-2|GSHR_HUMAN;sp|P00390-3|GSHR_HUMAN;sp|P00390|GSHR_HUMAN	sp|P00390-5|GSHR_HUMAN;sp|P00390-4|GSHR_HUMAN;sp|P00390-2|GSHR_HUMAN;sp|P00390-3|GSHR_HUMAN;sp|P00390|GSHR_HUMAN	2;2;2;2;2	2;2;2;2;2	2;2;2;2;2	>sp|P00390-5|GSHR_HUMAN Isoform 4 of Glutathione reductase, mitochondrial OS=Homo sapiens OX=9606 GN=GSR;>sp|P00390-4|GSHR_HUMAN Isoform 3 of Glutathione reductase, mitochondrial OS=Homo sapiens OX=9606 GN=GSR;>sp|P00390-2|GSHR_HUMAN Isoform Cytoplasmic of	5	2	2	2	2	1	1	2	2	2	2	1	1	2	2	2	2	1	1	2	2	2	7.5	7.5	7.5	47.267	440	440;469;479;493;522	0	By MS/MS	By matching	By MS/MS	By matching	By MS/MS	By MS/MS	7.5	2.7	4.8	7.5	7.5	7.5	12408000	2509100	253180
sp|P00441|SODC_HUMAN;tr|H7BYH4|H7BYH4_HUMAN	sp|P00441|SODC_HUMAN;tr|H7BYH4|H7BYH4_HUMAN	3;2	3;2	3;2	>sp|P00441|SODC_HUMAN Superoxide dismutase [Cu-Zn] OS=Homo sapiens OX=9606 GN=SOD1 PE=1 SV=2;>tr|H7BYH4|H7BYH4_HUMAN Superoxide dismutase [Cu-Zn] OS=Homo sapiens OX=9606 GN=SOD1 PE=1 SV=1	2	3	3	3	2	0	2	2	0	1	2	0	2	2	0	1	2	0	2	2	0	1	46.1	46.1	46.1	15.936	154	154;135	0	By MS/MS	By matching	By MS/MS	By matching	By matching	By MS/MS	22.7	0	32.5	32.5	0	13.6	6983500	2590500	0
sp|P00450|CERU_HUMAN;tr|E9PFZ2|E9PFZ2_HUMAN;tr|H7C5R1|H7C5R1_HUMAN;tr|D6RE86|D6RE86_HUMAN;CON__ENSEMBL:ENSBTAP00000031900	sp|P00450|CERU_HUMAN;tr|E9PFZ2|E9PFZ2_HUMAN	12;11;5;3;1	12;11;5;3;1	12;11;5;3;1	>sp|P00450|CERU_HUMAN Ceruloplasmin OS=Homo sapiens OX=9606 GN=CP PE=1 SV=1;>tr|E9PFZ2|E9PFZ2_HUMAN Ceruloplasmin OS=Homo sapiens OX=9606 GN=CP PE=1 SV=1	5	12	12	12	3	8	11	12	10	12	3	8	11	12	10	12	3	8	11	12	10	12	16.6	16.6	16.6	122.2	1065	1065;946;852;178;1064	0	By matching	By MS/MS	By MS/MS	By MS/MS	By MS/MS	By MS/MS	4.3	11.5	14.5	16.6	14.5	16.6	122220000	897500	4528100
sp|P00558|PGK1_HUMAN;sp|P00558-2|PGK1_HUMAN;sp|P07205|PGK2_HUMAN	sp|P00558|PGK1_HUMAN;sp|P00558-2|PGK1_HUMAN	7;6;1	7;6;1	7;6;1	>sp|P00558|PGK1_HUMAN Phosphoglycerate kinase 1 OS=Homo sapiens OX=9606 GN=PGK1 PE=1 SV=3;>sp|P00558-2|PGK1_HUMAN Isoform 2 of Phosphoglycerate kinase 1 OS=Homo sapiens OX=9606 GN=PGK1	3	7	7	7	6	3	5	4	4	4	6	3	5	4	4	4	6	3	5	4	4	4	24	24	24	44.614	417	417;389;417	0	By MS/MS	By matching	By MS/MS	By matching	By MS/MS	By MS/MS	19.9	8.9	15.6	14.9	11.5	13.4	25619000	10148000	913280
sp|P00734|THRB_HUMAN;tr|E9PIT3|E9PIT3_HUMAN;tr|C9JV37|C9JV37_HUMAN;CON__P00735	sp|P00734|THRB_HUMAN;tr|E9PIT3|E9PIT3_HUMAN	21;16;7;3	21;16;7;3	21;16;7;3	>sp|P00734|THRB_HUMAN Prothrombin OS=Homo sapiens OX=9606 GN=F2 PE=1 SV=2;>tr|E9PIT3|E9PIT3_HUMAN Prothrombin OS=Homo sapiens OX=9606 GN=F2 PE=1 SV=1	4	21	21	21	14	12	21	20	21	21	14	12	21	20	21	21	14	12	21	20	21	21	46	46	46	70.036	622	622;583;324;625	0	By MS/MS	By MS/MS	By MS/MS	By MS/MS	By MS/MS	By MS/MS	32	28	46	46	46	46	502620000	32731000	18743000
tr|A0A0C4DGL8|A0A0C4DGL8_HUMAN;tr|J3QR68|J3QR68_HUMAN;sp|P00738|HPT_HUMAN;tr|H0Y300|H0Y300_HUMAN;sp|P00738-2|HPT_HUMAN;tr|J3QLC9|J3QLC9_HUMAN;tr|A0A087WU08|A0A087WU08_HUMAN;sp|P00739|HPTR_HUMAN;sp|P00739-2|HPTR_HUMAN;tr|H3BS21|H3BS21_HUMAN;tr|A0A0A0MRD9|A0A0A0MRD9_HUMAN;tr|J3KTC3|J3KTC3_HUMAN;tr|J3KRH2|J3KRH2_HUMAN	tr|A0A0C4DGL8|A0A0C4DGL8_HUMAN;tr|J3QR68|J3QR68_HUMAN;sp|P00738|HPT_HUMAN;tr|H0Y300|H0Y300_HUMAN;sp|P00738-2|HPT_HUMAN;tr|J3QLC9|J3QLC9_HUMAN;tr|A0A087WU08|A0A087WU08_HUMAN;sp|P00739|HPTR_HUMAN;sp|P00739-2|HPTR_HUMAN	17;17;17;17;14;14;13;9;9;7;5;4;3	17;17;17;17;14;14;13;9;9;7;5;4;3	17;17;17;17;14;14;13;9;9;7;5;4;3	>tr|A0A0C4DGL8|A0A0C4DGL8_HUMAN Haptoglobin OS=Homo sapiens OX=9606 GN=HP PE=1 SV=1;>tr|J3QR68|J3QR68_HUMAN Haptoglobin (Fragment) OS=Homo sapiens OX=9606 GN=HP PE=1 SV=1;>sp|P00738|HPT_HUMAN Haptoglobin OS=Homo sapiens OX=9606 GN=HP PE=1 SV=1;>tr|H0Y300|H	13	17	17	17	12	12	13	13	15	14	12	12	13	13	15	14	12	12	13	13	15	14	50.7	50.7	50.7	38.451	347	347;404;406;442;347;365;281;348;385;222;281;117;149	0	By MS/MS	By MS/MS	By MS/MS	By MS/MS	By MS/MS	By MS/MS	34	34	44.7	41.2	47.3	43.5	230280000	7123900	13056000
sp|P00742|FA10_HUMAN;tr|Q5JVE8|Q5JVE8_HUMAN;tr|B7ZBK1|B7ZBK1_HUMAN	sp|P00742|FA10_HUMAN	5;1;1	5;1;1	5;1;1	>sp|P00742|FA10_HUMAN Coagulation factor X OS=Homo sapiens OX=9606 GN=F10 PE=1 SV=2	3	5	5	5	2	2	4	4	5	4	2	2	4	4	5	4	2	2	4	4	5	4	13.9	13.9	13.9	54.731	488	488;332;334	0	By matching	By matching	By MS/MS	By MS/MS	By MS/MS	By MS/MS	3.7	3.7	10.7	10.7	13.9	10.7	25800000	1100700	619330
sp|P01008|ANT3_HUMAN;tr|Q8TCE1|Q8TCE1_HUMAN;CON__P41361	sp|P01008|ANT3_HUMAN;tr|Q8TCE1|Q8TCE1_HUMAN	11;7;1	11;7;1	10;7;1	>sp|P01008|ANT3_HUMAN Antithrombin-III OS=Homo sapiens OX=9606 GN=SERPINC1 PE=1 SV=1;>tr|Q8TCE1|Q8TCE1_HUMAN Antithrombin-III OS=Homo sapiens OX=9606 GN=SERPINC1 PE=1 SV=1	3	11	11	10	6	9	10	10	10	10	6	9	10	10	10	10	6	9	10	10	10	10	26.3	26.3	25.2	52.602	464	464;259;465	0	By matching	By MS/MS	By MS/MS	By MS/MS	By MS/MS	By MS/MS	15.7	22.8	25.2	25.2	25.2	25.2	125400000	5245800	10223000
sp|P01009|A1AT_HUMAN;tr|A0A024R6I7|A0A024R6I7_HUMAN;sp|P01009-2|A1AT_HUMAN;tr|A0A0G2JRN3|A0A0G2JRN3_HUMAN;sp|P01009-3|A1AT_HUMAN;tr|G3V2B9|G3V2B9_HUMAN;tr|G3V544|G3V544_HUMAN;tr|G3V5R8|G3V5R8_HUMAN;tr|G3V387|G3V387_HUMAN;tr|A0A0B4J278|A0A0B4J278_HUMAN	sp|P01009|A1AT_HUMAN;tr|A0A024R6I7|A0A024R6I7_HUMAN;sp|P01009-2|A1AT_HUMAN;tr|A0A0G2JRN3|A0A0G2JRN3_HUMAN;sp|P01009-3|A1AT_HUMAN	39;35;34;30;27;10;4;3;3;3	39;35;34;30;27;10;4;3;3;3	39;35;34;30;27;10;4;3;3;3	>sp|P01009|A1AT_HUMAN Alpha-1-antitrypsin OS=Homo sapiens OX=9606 GN=SERPINA1 PE=1 SV=3;>tr|A0A024R6I7|A0A024R6I7_HUMAN Alpha-1-antitrypsin OS=Homo sapiens OX=9606 GN=SERPINA1 PE=1 SV=1;>sp|P01009-2|A1AT_HUMAN Isoform 2 of Alpha-1-antitrypsin OS=Homo sapie	10	39	39	39	29	29	34	33	32	32	29	29	34	33	32	32	29	29	34	33	32	32	69.1	69.1	69.1	46.736	418	418;418;359;359;306;105;156;92;117;144	0	By MS/MS	By MS/MS	By MS/MS	By MS/MS	By MS/MS	By MS/MS	62.2	65.8	65.8	62.9	66	67.9	5364800000	812780000	1213600000
sp|P01011|AACT_HUMAN;tr|G3V595|G3V595_HUMAN;tr|G3V3A0|G3V3A0_HUMAN;sp|P01011-2|AACT_HUMAN;tr|A0A087WY93|A0A087WY93_HUMAN	sp|P01011|AACT_HUMAN;tr|G3V595|G3V595_HUMAN	23;14;11;10;2	23;14;11;10;2	23;14;11;10;2	>sp|P01011|AACT_HUMAN Alpha-1-antichymotrypsin OS=Homo sapiens OX=9606 GN=SERPINA3 PE=1 SV=2;>tr|G3V595|G3V595_HUMAN Alpha-1-antichymotrypsin (Fragment) OS=Homo sapiens OX=9606 GN=SERPINA3 PE=1 SV=3	5	23	23	23	21	20	21	18	20	16	21	20	21	18	20	16	21	20	21	18	20	16	49.6	49.6	49.6	47.65	423	423;305;205;216;46	0	By MS/MS	By MS/MS	By MS/MS	By MS/MS	By MS/MS	By MS/MS	48	42.3	49.6	38.1	42.1	34	1046400000	284570000	294980000
sp|P01019|ANGT_HUMAN	sp|P01019|ANGT_HUMAN	13	13	13	>sp|P01019|ANGT_HUMAN Angiotensinogen OS=Homo sapiens OX=9606 GN=AGT PE=1 SV=1	1	13	13	13	11	12	9	10	10	9	11	12	9	10	10	9	11	12	9	10	10	9	30.3	30.3	30.3	53.154	485	485	0	By MS/MS	By MS/MS	By MS/MS	By MS/MS	By MS/MS	By MS/MS	25.2	30.3	18.6	21.6	25.2	18.6	769820000	108550000	195450000
sp|P01023|A2MG_HUMAN;tr|F8W7L3|F8W7L3_HUMAN;sp|P20742-2|PZP_HUMAN;tr|H0YFH1|H0YFH1_HUMAN	sp|P01023|A2MG_HUMAN	85;7;7;6	85;7;7;6	74;7;0;6	>sp|P01023|A2MG_HUMAN Alpha-2-macroglobulin OS=Homo sapiens OX=9606 GN=A2M PE=1 SV=3	4	85	85	74	72	67	79	79	74	77	72	67	79	79	74	77	61	56	68	68	63	66	64.2	64.2	57.1	163.29	1474	1474;168;1268;73	0	By MS/MS	By MS/MS	By MS/MS	By MS/MS	By MS/MS	By MS/MS	57.4	60	62.3	59.7	56.6	58.5	11431000000	1570800000	1694100000
sp|P01024|CO3_HUMAN;tr|M0QYC8|M0QYC8_HUMAN;tr|M0QXZ3|M0QXZ3_HUMAN;tr|M0R0Q9|M0R0Q9_HUMAN;tr|M0R1Q1|M0R1Q1_HUMAN	sp|P01024|CO3_HUMAN	118;14;9;3;2	118;14;9;3;2	109;13;7;3;2	>sp|P01024|CO3_HUMAN Complement C3 OS=Homo sapiens OX=9606 GN=C3 PE=1 SV=2	5	118	118	109	90	99	104	108	104	90	90	99	104	108	104	90	81	92	96	101	95	84	77.4	77.4	75	187.15	1663	1663;192;100;101;103	0	By MS/MS	By MS/MS	By MS/MS	By MS/MS	By MS/MS	By MS/MS	59.4	70.1	69.9	71.5	66.5	55.1	7044600000	495800000	939700000
sp|P01031|CO5_HUMAN;CON__Q1A7A4	sp|P01031|CO5_HUMAN	13;1	13;1	13;1	>sp|P01031|CO5_HUMAN Complement C5 OS=Homo sapiens OX=9606 GN=C5 PE=1 SV=4	2	13	13	13	10	10	12	6	11	9	10	10	12	6	11	9	10	10	12	6	11	9	10.6	10.6	10.6	188.3	1676	1676;1677	0	By MS/MS	By MS/MS	By MS/MS	By matching	By MS/MS	By MS/MS	7.8	7.8	9.7	5	9	7	106970000	10682000	8480100
sp|P01344|IGF2_HUMAN;sp|P01344-2|IGF2_HUMAN;sp|P01344-3|IGF2_HUMAN	sp|P01344|IGF2_HUMAN;sp|P01344-2|IGF2_HUMAN;sp|P01344-3|IGF2_HUMAN	2;2;2	2;2;2	2;2;2	>sp|P01344|IGF2_HUMAN Insulin-like growth factor II OS=Homo sapiens OX=9606 GN=IGF2 PE=1 SV=1;>sp|P01344-2|IGF2_HUMAN Isoform 2 of Insulin-like growth factor II OS=Homo sapiens OX=9606 GN=IGF2;>sp|P01344-3|IGF2_HUMAN Isoform 3 of Insulin-like growth factor	3	2	2	2	1	0	2	1	2	2	1	0	2	1	2	2	1	0	2	1	2	2	9.4	9.4	9.4	20.14	180	180;183;236	0	By matching	By matching	By MS/MS	By matching	By MS/MS	By MS/MS	5	0	9.4	5	9.4	9.4	13241000	387590	0
tr|Q3BDU5|Q3BDU5_HUMAN;sp|P02545-2|LMNA_HUMAN;sp|P02545-6|LMNA_HUMAN;sp|P02545|LMNA_HUMAN;tr|Q5TCI8|Q5TCI8_HUMAN;sp|P02545-5|LMNA_HUMAN;sp|P02545-4|LMNA_HUMAN;sp|P02545-3|LMNA_HUMAN	tr|Q3BDU5|Q3BDU5_HUMAN;sp|P02545-2|LMNA_HUMAN;sp|P02545-6|LMNA_HUMAN;sp|P02545|LMNA_HUMAN;tr|Q5TCI8|Q5TCI8_HUMAN;sp|P02545-5|LMNA_HUMAN;sp|P02545-4|LMNA_HUMAN;sp|P02545-3|LMNA_HUMAN	2;2;2;2;1;1;1;1	2;2;2;2;1;1;1;1	2;2;2;2;1;1;1;1	>tr|Q3BDU5|Q3BDU5_HUMAN Prelamin-A/C OS=Homo sapiens OX=9606 GN=LMNA PE=1 SV=1;>sp|P02545-2|LMNA_HUMAN Isoform C of Prelamin-A/C OS=Homo sapiens OX=9606 GN=LMNA;>sp|P02545-6|LMNA_HUMAN Isoform 6 of Prelamin-A/C OS=Homo sapiens OX=9606 GN=LMNA;>sp|P02545|LM	8	2	2	2	2	0	0	0	0	1	2	0	0	0	0	1	2	0	0	0	0	1	5.7	5.7	5.7	55.637	487	487;572;614;664;491;565;574;634	0	By MS/MS	By matching	By matching	By matching	By matching	By matching	5.7	0	0	0	0	2.9	1262600	1262600	0
sp|P02647|APOA1_HUMAN;tr|F8W696|F8W696_HUMAN	sp|P02647|APOA1_HUMAN;tr|F8W696|F8W696_HUMAN	39;31	39;31	38;30	>sp|P02647|APOA1_HUMAN Apolipoprotein A-I OS=Homo sapiens OX=9606 GN=APOA1 PE=1 SV=1;>tr|F8W696|F8W696_HUMAN Apolipoprotein A-I OS=Homo sapiens OX=9606 GN=APOA1 PE=1 SV=1	2	39	39	38	35	35	38	35	35	38	35	35	38	35	35	38	34	34	37	34	34	37	85.4	85.4	85.4	30.777	267	267;245	0	By MS/MS	By MS/MS	By MS/MS	By MS/MS	By MS/MS	By MS/MS	85.4	84.6	85.4	82	83.9	85.4	13122000000	1083900000	1055500000
sp|P02649|APOE_HUMAN;tr|H0Y7L5|H0Y7L5_HUMAN;tr|E9PEV4|E9PEV4_HUMAN;tr|E7ERP7|E7ERP7_HUMAN;CON__Q03247	sp|P02649|APOE_HUMAN;tr|H0Y7L5|H0Y7L5_HUMAN;tr|E9PEV4|E9PEV4_HUMAN;tr|E7ERP7|E7ERP7_HUMAN	27;18;17;17;4	27;18;17;17;4	27;18;17;17;4	>sp|P02649|APOE_HUMAN Apolipoprotein E OS=Homo sapiens OX=9606 GN=APOE PE=1 SV=1;>tr|H0Y7L5|H0Y7L5_HUMAN Apolipoprotein E (Fragment) OS=Homo sapiens OX=9606 GN=APOE PE=1 SV=2;>tr|E9PEV4|E9PEV4_HUMAN Apolipoprotein E (Fragment) OS=Homo sapiens OX=9606 GN=AP	5	27	27	27	24	24	25	24	25	26	24	24	25	24	25	26	24	24	25	24	25	26	75.1	75.1	75.1	36.154	317	317;269;216;219;316	0	By MS/MS	By MS/MS	By MS/MS	By MS/MS	By MS/MS	By MS/MS	67.5	71.3	71.9	67.2	71.9	75.1	3420300000	251320000	191710000
sp|P02652|APOA2_HUMAN;tr|V9GYM3|V9GYM3_HUMAN;tr|V9GYG9|V9GYG9_HUMAN;tr|V9GYE3|V9GYE3_HUMAN;tr|V9GYC1|V9GYC1_HUMAN;tr|V9GYS1|V9GYS1_HUMAN	sp|P02652|APOA2_HUMAN;tr|V9GYM3|V9GYM3_HUMAN;tr|V9GYG9|V9GYG9_HUMAN;tr|V9GYE3|V9GYE3_HUMAN;tr|V9GYC1|V9GYC1_HUMAN;tr|V9GYS1|V9GYS1_HUMAN	10;10;8;7;5;5	10;10;8;7;5;5	10;10;8;7;5;5	>sp|P02652|APOA2_HUMAN Apolipoprotein A-II OS=Homo sapiens OX=9606 GN=APOA2 PE=1 SV=1;>tr|V9GYM3|V9GYM3_HUMAN Apolipoprotein A-II OS=Homo sapiens OX=9606 GN=APOA2 PE=1 SV=1;>tr|V9GYG9|V9GYG9_HUMAN Apolipoprotein A-II (Fragment) OS=Homo sapiens OX=9606 GN=A	6	10	10	10	7	8	5	10	10	10	7	8	5	10	10	10	7	8	5	10	10	10	72	72	72	11.175	100	100;133;95;52;66;82	0	By MS/MS	By MS/MS	By MS/MS	By MS/MS	By MS/MS	By MS/MS	64	69	40	72	72	72	1568400000	56345000	20882000
tr|A0A024R0T9|A0A024R0T9_HUMAN;sp|P02655|APOC2_HUMAN;tr|K7ER74|K7ER74_HUMAN;tr|Q6P163|Q6P163_HUMAN;tr|V9GYJ8|V9GYJ8_HUMAN	tr|A0A024R0T9|A0A024R0T9_HUMAN;sp|P02655|APOC2_HUMAN;tr|K7ER74|K7ER74_HUMAN;tr|Q6P163|Q6P163_HUMAN;tr|V9GYJ8|V9GYJ8_HUMAN	3;3;3;2;2	3;3;3;2;2	3;3;3;2;2	>tr|A0A024R0T9|A0A024R0T9_HUMAN Apolipoprotein C-II isoform 1 OS=Homo sapiens OX=9606 GN=APOC4-APOC2 PE=1 SV=1;>sp|P02655|APOC2_HUMAN Apolipoprotein C-II OS=Homo sapiens OX=9606 GN=APOC2 PE=1 SV=1;>tr|K7ER74|K7ER74_HUMAN APOC4-APOC2 readthrough (NMD candid	5	3	3	3	3	3	3	3	3	3	3	3	3	3	3	3	3	3	3	3	3	3	43.6	43.6	43.6	11.284	101	101;101;178;72;87	0	By MS/MS	By matching	By MS/MS	By MS/MS	By MS/MS	By MS/MS	43.6	43.6	43.6	43.6	43.6	43.6	79350000	2806400	2214500
sp|P02656|APOC3_HUMAN;tr|B0YIW2|B0YIW2_HUMAN	sp|P02656|APOC3_HUMAN;tr|B0YIW2|B0YIW2_HUMAN	3;3	3;3	3;3	>sp|P02656|APOC3_HUMAN Apolipoprotein C-III OS=Homo sapiens OX=9606 GN=APOC3 PE=1 SV=1;>tr|B0YIW2|B0YIW2_HUMAN Apolipoprotein C-III variant 1 OS=Homo sapiens OX=9606 GN=APOC3 PE=1 SV=1	2	3	3	3	1	1	2	2	3	3	1	1	2	2	3	3	1	1	2	2	3	3	34.3	34.3	34.3	10.852	99	99;117	0	By matching	By matching	By MS/MS	By MS/MS	By MS/MS	By MS/MS	16.2	16.2	27.3	27.3	34.3	34.3	75982000	1320300	2035800
sp|P02671-2|FIBA_HUMAN;sp|P02671|FIBA_HUMAN;tr|A0A087WUA0|A0A087WUA0_HUMAN	sp|P02671-2|FIBA_HUMAN;sp|P02671|FIBA_HUMAN	16;16;5	16;16;5	16;16;5	>sp|P02671-2|FIBA_HUMAN Isoform 2 of Fibrinogen alpha chain OS=Homo sapiens OX=9606 GN=FGA;>sp|P02671|FIBA_HUMAN Fibrinogen alpha chain OS=Homo sapiens OX=9606 GN=FGA PE=1 SV=2	3	16	16	16	15	6	16	14	13	15	15	6	16	14	13	15	15	6	16	14	13	15	34.2	34.2	34.2	69.756	644	644;866;289	0	By MS/MS	By matching	By MS/MS	By MS/MS	By MS/MS	By MS/MS	30.9	12.3	34.2	28.9	25.6	32.8	254770000	30517000	741300
sp|P02675|FIBB_HUMAN;tr|D6REL8|D6REL8_HUMAN;CON__P02676	sp|P02675|FIBB_HUMAN;tr|D6REL8|D6REL8_HUMAN	12;11;1	12;11;1	12;11;1	>sp|P02675|FIBB_HUMAN Fibrinogen beta chain OS=Homo sapiens OX=9606 GN=FGB PE=1 SV=2;>tr|D6REL8|D6REL8_HUMAN Fibrinogen beta chain OS=Homo sapiens OX=9606 GN=FGB PE=1 SV=1	3	12	12	12	10	1	12	8	0	12	10	1	12	8	0	12	10	1	12	8	0	12	34.8	34.8	34.8	55.928	491	491;272;495	0	By MS/MS	By matching	By MS/MS	By MS/MS	By matching	By MS/MS	26.7	3.7	34.8	23.6	0	34.8	61477000	15919000	0
sp|P02679-2|FIBG_HUMAN;tr|C9JEU5|C9JEU5_HUMAN;sp|P02679|FIBG_HUMAN;tr|C9JC84|C9JC84_HUMAN;tr|C9JPQ9|C9JPQ9_HUMAN;tr|C9JU00|C9JU00_HUMAN	sp|P02679-2|FIBG_HUMAN;tr|C9JEU5|C9JEU5_HUMAN;sp|P02679|FIBG_HUMAN;tr|C9JC84|C9JC84_HUMAN	15;15;15;15;5;5	15;15;15;15;5;5	15;15;15;15;5;5	>sp|P02679-2|FIBG_HUMAN Isoform Gamma-A of Fibrinogen gamma chain OS=Homo sapiens OX=9606 GN=FGG;>tr|C9JEU5|C9JEU5_HUMAN Fibrinogen gamma chain OS=Homo sapiens OX=9606 GN=FGG PE=1 SV=1;>sp|P02679|FIBG_HUMAN Fibrinogen gamma chain OS=Homo sapiens OX=9606 GN	6	15	15	15	13	8	12	13	10	12	13	8	12	13	10	12	13	8	12	13	10	12	46	46	46	49.496	437	437;445;453;461;119;123	0	By MS/MS	By MS/MS	By MS/MS	By MS/MS	By MS/MS	By MS/MS	37.1	25.9	34.6	38.4	28.4	35.9	168470000	47702000	6687400
sp|P02749|APOH_HUMAN;tr|J3QRN2|J3QRN2_HUMAN;tr|J3QLI0|J3QLI0_HUMAN;tr|J3KS17|J3KS17_HUMAN;CON__P17690	sp|P02749|APOH_HUMAN	21;9;9;5;3	21;9;9;5;3	21;9;9;5;3	>sp|P02749|APOH_HUMAN Beta-2-glycoprotein 1 OS=Homo sapiens OX=9606 GN=APOH PE=1 SV=3	5	21	21	21	12	11	19	19	20	21	12	11	19	19	20	21	12	11	19	19	20	21	68.1	68.1	68.1	38.298	345	345;181;200;104;345	0	By MS/MS	By MS/MS	By MS/MS	By MS/MS	By MS/MS	By MS/MS	49	44.6	65.5	65.5	68.1	68.1	2752500000	53450000	58550000
sp|P02750|A2GL_HUMAN	sp|P02750|A2GL_HUMAN	4	4	4	>sp|P02750|A2GL_HUMAN Leucine-rich alpha-2-glycoprotein OS=Homo sapiens OX=9606 GN=LRG1 PE=1 SV=2	1	4	4	4	1	3	4	3	4	3	1	3	4	3	4	3	1	3	4	3	4	3	15.9	15.9	15.9	38.177	347	347	0	By matching	By MS/MS	By MS/MS	By MS/MS	By MS/MS	By MS/MS	2.9	13	15.9	13	15.9	13	22395000	1053300	2116300
sp|P02751-6|FINC_HUMAN;sp|P02751-17|FINC_HUMAN;sp|P02751-3|FINC_HUMAN;sp|P02751|FINC_HUMAN;sp|P02751-7|FINC_HUMAN;sp|P02751-15|FINC_HUMAN;sp|P02751-5|FINC_HUMAN;sp|P02751-10|FINC_HUMAN;sp|P02751-9|FINC_HUMAN;sp|P02751-14|FINC_HUMAN;sp|P02751-13|FINC_HUMAN;sp|P02751-8|FINC_HUMAN;sp|P02751-11|FINC_HUMAN;sp|P02751-12|FINC_HUMAN;sp|P02751-4|FINC_HUMAN;tr|H0Y7Z1|H0Y7Z1_HUMAN;sp|P02751-16|FINC_HUMAN;sp…	sp|P02751-6|FINC_HUMAN;sp|P02751-17|FINC_HUMAN;sp|P02751-3|FINC_HUMAN;sp|P02751|FINC_HUMAN;sp|P02751-7|FINC_HUMAN;sp|P02751-15|FINC_HUMAN;sp|P02751-5|FINC_HUMAN;sp|P02751-10|FINC_HUMAN;sp|P02751-9|FINC_HUMAN;sp|P02751-14|FINC_HUMAN;sp|P02751-13|FINC_HUMAN;sp|P02751-8|FINC_HUMAN;sp|P02751-11|FINC_HUMAN;sp|P02751-12|FINC_HUMAN;sp|P02751-4|FINC_HUMAN	60;60;60;60;60;60;59;57;57;57;57;57;57;52;52;24;21;18;2	60;60;60;60;60;60;59;57;57;57;57;57;57;52;52;24;21;18;2	60;60;60;60;60;60;59;57;57;57;57;57;57;52;52;24;21;18;2	>sp|P02751-6|FINC_HUMAN Isoform 6 of Fibronectin OS=Homo sapiens OX=9606 GN=FN1;>sp|P02751-17|FINC_HUMAN Isoform 17 of Fibronectin OS=Homo sapiens OX=9606 GN=FN1;>sp|P02751-3|FINC_HUMAN Isoform 3 of Fibronectin OS=Homo sapiens OX=9606 GN=FN1;>sp|P02751|FIN	19	60	60	60	44	42	56	46	34	29	44	42	56	46	34	29	44	42	56	46	34	29	42.6	42.6	42.6	240.51	2184	2184;2330;2355;2386;2446;2477;2211;2176;2240;2265;2267;2296;2386;2008;2031;1103;657;642;241	0	By MS/MS	By MS/MS	By MS/MS	By MS/MS	By MS/MS	By MS/MS	30.1	29.4	38	32.3	23.3	20.5	1269600000	286680000	274250000
tr|Q5VY30|Q5VY30_HUMAN;sp|P02753|RET4_HUMAN	tr|Q5VY30|Q5VY30_HUMAN;sp|P02753|RET4_HUMAN	7;7	7;7	7;7	>tr|Q5VY30|Q5VY30_HUMAN Retinol-binding protein OS=Homo sapiens OX=9606 GN=RBP4 PE=1 SV=2;>sp|P02753|RET4_HUMAN Retinol-binding protein 4 OS=Homo sapiens OX=9606 GN=RBP4 PE=1 SV=3	2	7	7	7	5	4	6	6	5	4	5	4	6	6	5	4	5	4	6	6	5	4	53.3	53.3	53.3	22.974	199	199;201	0	By MS/MS	By MS/MS	By MS/MS	By MS/MS	By MS/MS	By MS/MS	36.7	24.1	47.7	48.2	38.7	33.7	56086000	7298400	2156100
sp|P02760|AMBP_HUMAN;tr|S4R3Y4|S4R3Y4_HUMAN;tr|S4R471|S4R471_HUMAN	sp|P02760|AMBP_HUMAN	19;9;7	19;9;7	19;9;7	>sp|P02760|AMBP_HUMAN Protein AMBP OS=Homo sapiens OX=9606 GN=AMBP PE=1 SV=1	3	19	19	19	12	13	17	18	16	17	12	13	17	18	16	17	12	13	17	18	16	17	54	54	54	38.999	352	352;238;193	0	By MS/MS	By MS/MS	By MS/MS	By MS/MS	By MS/MS	By MS/MS	49.1	42.3	51.7	51.7	52.6	49.1	2150400000	97480000	71923000
sp|P02763|A1AG1_HUMAN	sp|P02763|A1AG1_HUMAN	7	7	5	>sp|P02763|A1AG1_HUMAN Alpha-1-acid glycoprotein 1 OS=Homo sapiens OX=9606 GN=ORM1 PE=1 SV=1	1	7	7	5	4	7	4	5	4	4	4	7	4	5	4	4	3	5	3	4	3	3	33.8	33.8	25.4	23.511	201	201	0	By MS/MS	By MS/MS	By MS/MS	By MS/MS	By MS/MS	By MS/MS	16.9	33.8	16.9	23.9	16.9	16.9	856840000	45602000	131620000
sp|P02765|FETUA_HUMAN;tr|C9JV77|C9JV77_HUMAN	sp|P02765|FETUA_HUMAN;tr|C9JV77|C9JV77_HUMAN	20;18	20;18	16;16	>sp|P02765|FETUA_HUMAN Alpha-2-HS-glycoprotein OS=Homo sapiens OX=9606 GN=AHSG PE=1 SV=1;>tr|C9JV77|C9JV77_HUMAN Alpha-2-HS-glycoprotein OS=Homo sapiens OX=9606 GN=AHSG PE=1 SV=1	2	20	20	16	16	11	19	18	18	19	16	11	19	18	18	19	13	8	15	14	14	15	54	54	50.4	39.324	367	367;368	0	By MS/MS	By MS/MS	By MS/MS	By MS/MS	By MS/MS	By MS/MS	43.6	33.5	54	45.2	45.2	45.2	4280200000	271140000	184760000
sp|P02766|TTHY_HUMAN;tr|A0A087WT59|A0A087WT59_HUMAN;tr|A0A087WV45|A0A087WV45_HUMAN	sp|P02766|TTHY_HUMAN;tr|A0A087WT59|A0A087WT59_HUMAN;tr|A0A087WV45|A0A087WV45_HUMAN	2;2;1	2;2;1	2;2;1	>sp|P02766|TTHY_HUMAN Transthyretin OS=Homo sapiens OX=9606 GN=TTR PE=1 SV=1;>tr|A0A087WT59|A0A087WT59_HUMAN Transthyretin OS=Homo sapiens OX=9606 GN=TTR PE=1 SV=1;>tr|A0A087WV45|A0A087WV45_HUMAN Transthyretin OS=Homo sapiens OX=9606 GN=TTR PE=1 SV=1	3	2	2	2	2	1	2	2	2	2	2	1	2	2	2	2	2	1	2	2	2	2	24.5	24.5	24.5	15.887	147	147;185;139	0	By MS/MS	By matching	By matching	By MS/MS	By matching	By MS/MS	24.5	15.6	24.5	24.5	24.5	24.5	9414800	2729000	477700
sp|P02771|FETA_HUMAN;tr|J3KMX3|J3KMX3_HUMAN	sp|P02771|FETA_HUMAN;tr|J3KMX3|J3KMX3_HUMAN	56;54	56;54	49;47	>sp|P02771|FETA_HUMAN Alpha-fetoprotein OS=Homo sapiens OX=9606 GN=AFP PE=1 SV=1;>tr|J3KMX3|J3KMX3_HUMAN Alpha-fetoprotein OS=Homo sapiens OX=9606 GN=AFP PE=1 SV=1	2	56	56	49	42	34	50	53	51	52	42	34	50	53	51	52	35	30	44	47	44	46	81.9	81.9	76.2	68.677	609	609;622	0	By MS/MS	By MS/MS	By MS/MS	By MS/MS	By MS/MS	By MS/MS	73.2	72.2	81.4	80.3	81.9	81.9	10797000000	1260500000	838830000
tr|G3V0E5|G3V0E5_HUMAN;sp|P02786|TFR1_HUMAN	tr|G3V0E5|G3V0E5_HUMAN;sp|P02786|TFR1_HUMAN	5;5	5;5	5;5	>tr|G3V0E5|G3V0E5_HUMAN Transferrin receptor (P90, CD71), isoform CRA_c OS=Homo sapiens OX=9606 GN=TFRC PE=1 SV=1;>sp|P02786|TFR1_HUMAN Transferrin receptor protein 1 OS=Homo sapiens OX=9606 GN=TFRC PE=1 SV=2	2	5	5	5	2	1	5	1	4	1	2	1	5	1	4	1	2	1	5	1	4	1	10.6	10.6	10.6	75.963	679	679;760	0	By matching	By matching	By MS/MS	By matching	By matching	By matching	3.8	2.4	10.6	1.5	8.5	1.5	17910000	1203300	215440
sp|P02787|TRFE_HUMAN;tr|H7C5E8|H7C5E8_HUMAN;tr|C9JVG0|C9JVG0_HUMAN;tr|F8WCI6|F8WCI6_HUMAN;tr|C9JB55|C9JB55_HUMAN;tr|F8WEK9|F8WEK9_HUMAN;tr|F8WC57|F8WC57_HUMAN	sp|P02787|TRFE_HUMAN	68;13;9;6;5;5;1	68;13;9;6;5;5;1	66;11;9;6;5;5;1	>sp|P02787|TRFE_HUMAN Serotransferrin OS=Homo sapiens OX=9606 GN=TF PE=1 SV=3	7	68	68	66	46	50	63	67	63	65	46	50	63	67	63	65	44	48	62	65	61	63	75.8	75.8	74.1	77.063	698	698;143;134;120;75;115;102	0	By MS/MS	By MS/MS	By MS/MS	By MS/MS	By MS/MS	By MS/MS	65.9	66.2	68.3	75.8	70.8	75.1	13150000000	427530000	909150000
sp|P04003|C4BPA_HUMAN	sp|P04003|C4BPA_HUMAN	4	4	4	>sp|P04003|C4BPA_HUMAN C4b-binding protein alpha chain OS=Homo sapiens OX=9606 GN=C4BPA PE=1 SV=2	1	4	4	4	1	2	4	4	4	3	1	2	4	4	4	3	1	2	4	4	4	3	9.5	9.5	9.5	67.033	597	597	0	By matching	By matching	By MS/MS	By MS/MS	By MS/MS	By MS/MS	2	4.4	9.5	9.5	9.5	7.2	20856000	1007600	2117400
sp|P04004|VTNC_HUMAN;CON__Q3ZBS7;tr|F5GX75|F5GX75_HUMAN;tr|H0YJW9|H0YJW9_HUMAN	sp|P04004|VTNC_HUMAN	8;3;1;1	8;3;1;1	8;3;1;1	>sp|P04004|VTNC_HUMAN Vitronectin OS=Homo sapiens OX=9606 GN=VTN PE=1 SV=1	4	8	8	8	6	4	6	7	8	6	6	4	6	7	8	6	6	4	6	7	8	6	19	19	19	54.305	478	478;484;118;148	0	By MS/MS	By MS/MS	By MS/MS	By MS/MS	By MS/MS	By MS/MS	14	11.7	14.4	18.4	19	17.4	168740000	5681100	2476100
sp|P04070|PROC_HUMAN;tr|E7END6|E7END6_HUMAN;sp|P04070-2|PROC_HUMAN;tr|E7ENR9|E7ENR9_HUMAN;tr|H7BYX9|H7BYX9_HUMAN	sp|P04070|PROC_HUMAN;tr|E7END6|E7END6_HUMAN;sp|P04070-2|PROC_HUMAN	4;4;4;1;1	4;4;4;1;1	4;4;4;1;1	>sp|P04070|PROC_HUMAN Vitamin K-dependent protein C OS=Homo sapiens OX=9606 GN=PROC PE=1 SV=1;>tr|E7END6|E7END6_HUMAN Vitamin K-dependent protein C OS=Homo sapiens OX=9606 GN=PROC PE=1 SV=1;>sp|P04070-2|PROC_HUMAN Isoform 2 of Vitamin K-dependent protein C	5	4	4	4	2	2	3	3	4	2	2	2	3	3	4	2	2	2	3	3	4	2	12.8	12.8	12.8	52.071	461	461;495;516;175;236	0	By matching	By MS/MS	By MS/MS	By MS/MS	By MS/MS	By MS/MS	6.9	6.9	8.5	9.8	12.8	5.4	28795000	1443000	1567400
sp|P04075|ALDOA_HUMAN;tr|J3KPS3|J3KPS3_HUMAN;sp|P04075-2|ALDOA_HUMAN;tr|H3BQN4|H3BQN4_HUMAN;tr|H3BPS8|H3BPS8_HUMAN;tr|H3BUH7|H3BUH7_HUMAN;tr|H3BR04|H3BR04_HUMAN;tr|H3BMQ8|H3BMQ8_HUMAN;tr|H3BU78|H3BU78_HUMAN;tr|H3BR68|H3BR68_HUMAN;sp|P09972|ALDOC_HUMAN;tr|A0A087WXX2|A0A087WXX2_HUMAN;sp|P05062|ALDOB_HUMAN	sp|P04075|ALDOA_HUMAN;tr|J3KPS3|J3KPS3_HUMAN;sp|P04075-2|ALDOA_HUMAN;tr|H3BQN4|H3BQN4_HUMAN;tr|H3BPS8|H3BPS8_HUMAN;tr|H3BUH7|H3BUH7_HUMAN	19;18;18;17;12;10;9;8;8;5;2;1;1	19;18;18;17;12;10;9;8;8;5;2;1;1	18;17;17;16;12;10;9;8;7;4;2;1;1	>sp|P04075|ALDOA_HUMAN Fructose-bisphosphate aldolase A OS=Homo sapiens OX=9606 GN=ALDOA PE=1 SV=2;>tr|J3KPS3|J3KPS3_HUMAN Fructose-bisphosphate aldolase OS=Homo sapiens OX=9606 GN=ALDOA PE=1 SV=1;>sp|P04075-2|ALDOA_HUMAN Isoform 2 of Fructose-bisphosphate	13	19	19	18	17	11	16	13	17	16	17	11	16	13	17	16	17	11	16	13	17	16	71.7	71.7	71.7	39.42	364	364;368;418;361;278;155;162;140;204;130;364;316;364	0	By MS/MS	By MS/MS	By MS/MS	By MS/MS	By MS/MS	By MS/MS	64	45.1	66.2	55.8	67.6	59.9	547330000	95441000	12006000
sp|P04114|APOB_HUMAN;tr|A8MUN2|A8MUN2_HUMAN	sp|P04114|APOB_HUMAN	76;30	76;30	76;30	>sp|P04114|APOB_HUMAN Apolipoprotein B-100 OS=Homo sapiens OX=9606 GN=APOB PE=1 SV=2	2	76	76	76	51	50	60	53	71	68	51	50	60	53	71	68	51	50	60	53	71	68	22.8	22.8	22.8	515.6	4563	4563;828	0	By MS/MS	By MS/MS	By MS/MS	By MS/MS	By MS/MS	By MS/MS	15.8	14.6	18.1	16.2	21.3	20.4	1082800000	82957000	55640000
sp|P04217|A1BG_HUMAN;sp|P04217-2|A1BG_HUMAN;tr|M0R009|M0R009_HUMAN	sp|P04217|A1BG_HUMAN;sp|P04217-2|A1BG_HUMAN;tr|M0R009|M0R009_HUMAN	15;11;8	15;11;8	14;10;7	>sp|P04217|A1BG_HUMAN Alpha-1B-glycoprotein OS=Homo sapiens OX=9606 GN=A1BG PE=1 SV=4;>sp|P04217-2|A1BG_HUMAN Isoform 2 of Alpha-1B-glycoprotein OS=Homo sapiens OX=9606 GN=A1BG;>tr|M0R009|M0R009_HUMAN Alpha-1B-glycoprotein (Fragment) OS=Homo sapiens OX=960	3	15	15	14	4	8	13	14	13	13	4	8	13	14	13	13	3	7	12	13	12	12	44	44	42.6	54.253	495	495;373;305	0	By matching	By MS/MS	By MS/MS	By MS/MS	By MS/MS	By MS/MS	8.5	22	41	42.2	36.6	39.6	282680000	2963900	3948600
sp|P04264|K2C1_HUMAN;CON__P04264;CON__ENSEMBL:ENSBTAP00000038253;CON__Q9R0H5;CON__Q6NXH9;CON__P50446;CON__Q6IFZ6;sp|Q7Z794|K2C1B_HUMAN;CON__Q7Z794	sp|P04264|K2C1_HUMAN;CON__P04264	14;12;2;1;1;1;1;1;1	14;12;2;1;1;1;1;1;1	11;9;1;0;0;0;0;0;0	>sp|P04264|K2C1_HUMAN Keratin, type II cytoskeletal 1 OS=Homo sapiens OX=9606 GN=KRT1 PE=1 SV=6;>P04264 SWISS-PROT:P04264 Tax_Id=9606 Gene_Symbol=KRT1 Keratin, type II cytoskeletal 1	9	14	14	11	13	13	13	13	11	10	13	13	13	13	11	10	10	10	10	10	8	8	30.3	30.3	26.9	66.038	644	644;644;606;524;539;553;572;578;578	0	By MS/MS	By MS/MS	By MS/MS	By MS/MS	By MS/MS	By MS/MS	28	30.3	28	24.2	21.9	19.4	183540000	29292000	53894000
sp|P04406|G3P_HUMAN;sp|P04406-2|G3P_HUMAN;tr|E7EUT5|E7EUT5_HUMAN	sp|P04406|G3P_HUMAN;sp|P04406-2|G3P_HUMAN;tr|E7EUT5|E7EUT5_HUMAN	14;13;11	14;13;11	14;13;11	>sp|P04406|G3P_HUMAN Glyceraldehyde-3-phosphate dehydrogenase OS=Homo sapiens OX=9606 GN=GAPDH PE=1 SV=3;>sp|P04406-2|G3P_HUMAN Isoform 2 of Glyceraldehyde-3-phosphate dehydrogenase OS=Homo sapiens OX=9606 GN=GAPDH;>tr|E7EUT5|E7EUT5_HUMAN Glyceraldehyde-3-	3	14	14	14	12	9	13	12	11	13	12	9	13	12	11	13	12	9	13	12	11	13	64.5	64.5	64.5	36.053	335	335;293;260	0	By MS/MS	By MS/MS	By MS/MS	By MS/MS	By MS/MS	By MS/MS	46.9	40.9	62.1	50.7	44.5	60.3	201820000	34791000	3159300
sp|P05067-10|A4_HUMAN;tr|A0A0A0MRG2|A0A0A0MRG2_HUMAN;sp|P05067-3|A4_HUMAN;sp|P05067-4|A4_HUMAN;sp|P05067-5|A4_HUMAN;tr|E9PG40|E9PG40_HUMAN;sp|P05067-6|A4_HUMAN;sp|P05067-7|A4_HUMAN;sp|P05067-11|A4_HUMAN;sp|P05067-8|A4_HUMAN;sp|P05067-9|A4_HUMAN;sp|P05067|A4_HUMAN;tr|H7C0V9|H7C0V9_HUMAN;sp|P05067-2|A4_HUMAN	sp|P05067-10|A4_HUMAN;tr|A0A0A0MRG2|A0A0A0MRG2_HUMAN;sp|P05067-3|A4_HUMAN;sp|P05067-4|A4_HUMAN;sp|P05067-5|A4_HUMAN;tr|E9PG40|E9PG40_HUMAN;sp|P05067-6|A4_HUMAN;sp|P05067-7|A4_HUMAN;sp|P05067-11|A4_HUMAN;sp|P05067-8|A4_HUMAN;sp|P05067-9|A4_HUMAN;sp|P05067|A4_HUMAN;tr|H7C0V9|H7C0V9_HUMAN;sp|P05067-2|A4_HUMAN	5;5;5;5;5;5;5;5;5;5;5;5;4;3	5;5;5;5;5;5;5;5;5;5;5;5;4;3	5;5;5;5;5;5;5;5;5;5;5;5;4;3	>sp|P05067-10|A4_HUMAN Isoform APP639 of Amyloid-beta A4 protein OS=Homo sapiens OX=9606 GN=APP;>tr|A0A0A0MRG2|A0A0A0MRG2_HUMAN Amyloid-beta A4 protein OS=Homo sapiens OX=9606 GN=APP PE=1 SV=1;>sp|P05067-3|A4_HUMAN Isoform L-APP677 of Amyloid-beta A4 prote	14	5	5	5	3	2	5	4	4	5	3	2	5	4	4	5	3	2	5	4	4	5	13.1	13.1	13.1	72.552	639	639;660;677;695;696;714;714;733;746;751;752;770;485;305	0	By MS/MS	By MS/MS	By MS/MS	By MS/MS	By MS/MS	By MS/MS	7.4	4.9	13.1	9.9	9.9	13.1	33541000	2658900	1141500
sp|P05121-2|PAI1_HUMAN;sp|P05121|PAI1_HUMAN	sp|P05121-2|PAI1_HUMAN;sp|P05121|PAI1_HUMAN	1;1	1;1	1;1	>sp|P05121-2|PAI1_HUMAN Isoform 2 of Plasminogen activator inhibitor 1 OS=Homo sapiens OX=9606 GN=SERPINE1;>sp|P05121|PAI1_HUMAN Plasminogen activator inhibitor 1 OS=Homo sapiens OX=9606 GN=SERPINE1 PE=1 SV=1	2	1	1	1	0	1	1	1	1	1	0	1	1	1	1	1	0	1	1	1	1	1	5.9	5.9	5.9	43.404	387	387;402	0.0036496	By matching	By MS/MS	By MS/MS	By MS/MS	By MS/MS	By MS/MS	0	5.9	5.9	5.9	5.9	5.9	10252000	0	456440
sp|P05154|IPSP_HUMAN;tr|G3V5Q9|G3V5Q9_HUMAN;tr|G3V264|G3V264_HUMAN;tr|G3V2M1|G3V2M1_HUMAN;tr|G3V482|G3V482_HUMAN;tr|G3V265|G3V265_HUMAN;tr|G3V5I3|G3V5I3_HUMAN;tr|G3V4B4|G3V4B4_HUMAN;tr|G3V3F5|G3V3F5_HUMAN	sp|P05154|IPSP_HUMAN;tr|G3V5Q9|G3V5Q9_HUMAN	11;7;4;4;3;3;2;1;1	11;7;4;4;3;3;2;1;1	11;7;4;4;3;3;2;1;1	>sp|P05154|IPSP_HUMAN Plasma serine protease inhibitor OS=Homo sapiens OX=9606 GN=SERPINA5 PE=1 SV=3;>tr|G3V5Q9|G3V5Q9_HUMAN Plasma serine protease inhibitor (Fragment) OS=Homo sapiens OX=9606 GN=SERPINA5 PE=1 SV=1	9	11	11	11	10	10	10	9	9	10	10	10	10	9	9	10	10	10	10	9	9	10	31	31	31	45.674	406	406;301;172;231;144;157;45;86;90	0	By MS/MS	By MS/MS	By MS/MS	By MS/MS	By MS/MS	By MS/MS	28.6	28.1	27.1	23.9	24.6	27.1	122110000	17153000	24669000
tr|G3XAM2|G3XAM2_HUMAN;sp|P05156|CFAI_HUMAN;tr|E7ETH0|E7ETH0_HUMAN;tr|A0A2R8Y3M9|A0A2R8Y3M9_HUMAN;tr|A0A087X0I2|A0A087X0I2_HUMAN;tr|D6R9Z8|D6R9Z8_HUMAN;CON__Q32PI4	tr|G3XAM2|G3XAM2_HUMAN;sp|P05156|CFAI_HUMAN;tr|E7ETH0|E7ETH0_HUMAN;tr|A0A2R8Y3M9|A0A2R8Y3M9_HUMAN;tr|A0A087X0I2|A0A087X0I2_HUMAN	11;11;11;10;6;4;1	11;11;11;10;6;4;1	11;11;11;10;6;4;1	>tr|G3XAM2|G3XAM2_HUMAN Complement factor I, isoform CRA_b OS=Homo sapiens OX=9606 GN=CFI PE=1 SV=1;>sp|P05156|CFAI_HUMAN Complement factor I OS=Homo sapiens OX=9606 GN=CFI PE=1 SV=2;>tr|E7ETH0|E7ETH0_HUMAN Complement factor I OS=Homo sapiens OX=9606 GN=CF	7	11	11	11	7	6	10	6	10	7	7	6	10	6	10	7	7	6	10	6	10	7	25	25	25	65.059	576	576;583;591;631;378;161;618	0	By MS/MS	By MS/MS	By MS/MS	By MS/MS	By MS/MS	By MS/MS	14.1	14.8	23.3	13	23.3	13.7	120400000	10733000	9081800
sp|P05362|ICAM1_HUMAN;tr|K7EKL8|K7EKL8_HUMAN	sp|P05362|ICAM1_HUMAN;tr|K7EKL8|K7EKL8_HUMAN	2;1	2;1	2;1	>sp|P05362|ICAM1_HUMAN Intercellular adhesion molecule 1 OS=Homo sapiens OX=9606 GN=ICAM1 PE=1 SV=2;>tr|K7EKL8|K7EKL8_HUMAN Intercellular adhesion molecule 1 (Fragment) OS=Homo sapiens OX=9606 GN=ICAM1 PE=1 SV=1	2	2	2	2	1	0	1	1	1	2	1	0	1	1	1	2	1	0	1	1	1	2	4.5	4.5	4.5	57.825	532	532;180	0.0037594	By MS/MS	By matching	By matching	By matching	By matching	By MS/MS	2.6	0	1.9	1.9	1.9	4.5	4664100	526960	0
sp|P05386|RLA1_HUMAN	sp|P05386|RLA1_HUMAN	1	1	1	>sp|P05386|RLA1_HUMAN 60S acidic ribosomal protein P1 OS=Homo sapiens OX=9606 GN=RPLP1 PE=1 SV=1	1	1	1	1	1	0	1	1	1	0	1	0	1	1	1	0	1	0	1	1	1	0	14	14	14	11.514	114	114	0	By matching	By matching	By MS/MS	By MS/MS	By MS/MS	By matching	14	0	14	14	14	0	14865000	854870	0
sp|P05387|RLA2_HUMAN;tr|H0YDD8|H0YDD8_HUMAN	sp|P05387|RLA2_HUMAN;tr|H0YDD8|H0YDD8_HUMAN	2;1	2;1	2;1	>sp|P05387|RLA2_HUMAN 60S acidic ribosomal protein P2 OS=Homo sapiens OX=9606 GN=RPLP2 PE=1 SV=1;>tr|H0YDD8|H0YDD8_HUMAN 60S acidic ribosomal protein P2 (Fragment) OS=Homo sapiens OX=9606 GN=RPLP2 PE=1 SV=1	2	2	2	2	2	1	2	2	2	2	2	1	2	2	2	2	2	1	2	2	2	2	27	27	27	11.665	115	115;92	0	By MS/MS	By matching	By matching	By matching	By MS/MS	By matching	27	10.4	27	27	27	27	37764000	5238300	300830
tr|G3V210|G3V210_HUMAN;tr|F8VU65|F8VU65_HUMAN;sp|P05388-2|RLA0_HUMAN;tr|F8VWS0|F8VWS0_HUMAN;sp|Q8NHW5|RLA0L_HUMAN;sp|P05388|RLA0_HUMAN;tr|F8VS58|F8VS58_HUMAN;tr|F8VQY6|F8VQY6_HUMAN;tr|F8VPE8|F8VPE8_HUMAN;tr|F8VRK7|F8VRK7_HUMAN;tr|F8VW21|F8VW21_HUMAN;tr|F8VZS0|F8VZS0_HUMAN;tr|F8VWV4|F8VWV4_HUMAN	tr|G3V210|G3V210_HUMAN;tr|F8VU65|F8VU65_HUMAN;sp|P05388-2|RLA0_HUMAN;tr|F8VWS0|F8VWS0_HUMAN;sp|Q8NHW5|RLA0L_HUMAN;sp|P05388|RLA0_HUMAN;tr|F8VS58|F8VS58_HUMAN;tr|F8VQY6|F8VQY6_HUMAN;tr|F8VPE8|F8VPE8_HUMAN;tr|F8VRK7|F8VRK7_HUMAN;tr|F8VW21|F8VW21_HUMAN;tr|F8VZS0|F8VZS0_HUMAN	3;3;3;3;3;3;2;2;2;2;2;2;1	3;3;3;3;3;3;2;2;2;2;2;2;1	3;3;3;3;3;3;2;2;2;2;2;2;1	>tr|G3V210|G3V210_HUMAN 60S acidic ribosomal protein P0 OS=Homo sapiens OX=9606 GN=RPLP0 PE=1 SV=1;>tr|F8VU65|F8VU65_HUMAN 60S acidic ribosomal protein P0 (Fragment) OS=Homo sapiens OX=9606 GN=RPLP0 PE=1 SV=1;>sp|P05388-2|RLA0_HUMAN Isoform 2 of 60S acidic	13	3	3	3	2	0	2	2	3	3	2	0	2	2	3	3	2	0	2	2	3	3	19.9	19.9	19.9	18.27	166	166;247;255;281;317;317;121;142;153;156;244;246;111	0	By matching	By matching	By matching	By matching	By MS/MS	By MS/MS	13.3	0	13.3	13.3	19.9	19.9	10660000	1139300	0
tr|E9PFL9|E9PFL9_HUMAN;tr|E7ERC4|E7ERC4_HUMAN;sp|P05455|LA_HUMAN;tr|E9PGX9|E9PGX9_HUMAN	tr|E9PFL9|E9PFL9_HUMAN;tr|E7ERC4|E7ERC4_HUMAN;sp|P05455|LA_HUMAN;tr|E9PGX9|E9PGX9_HUMAN	2;2;2;1	2;2;2;1	2;2;2;1	>tr|E9PFL9|E9PFL9_HUMAN Lupus La protein OS=Homo sapiens OX=9606 GN=SSB PE=1 SV=1;>tr|E7ERC4|E7ERC4_HUMAN Lupus La protein (Fragment) OS=Homo sapiens OX=9606 GN=SSB PE=1 SV=1;>sp|P05455|LA_HUMAN Lupus La protein OS=Homo sapiens OX=9606 GN=SSB PE=1 SV=2;>tr	4	2	2	2	1	0	2	1	2	2	1	0	2	1	2	2	1	0	2	1	2	2	22.4	22.4	22.4	15.521	134	134;184;408;120	0	By MS/MS	By matching	By matching	By matching	By MS/MS	By matching	10.4	0	22.4	10.4	22.4	22.4	4328200	651300	0
sp|P05543|THBG_HUMAN;CON__Q9TT36	sp|P05543|THBG_HUMAN	7;1	7;1	7;1	>sp|P05543|THBG_HUMAN Thyroxine-binding globulin OS=Homo sapiens OX=9606 GN=SERPINA7 PE=1 SV=2	2	7	7	7	5	7	6	6	4	2	5	7	6	6	4	2	5	7	6	6	4	2	23.9	23.9	23.9	46.324	415	415;411	0	By MS/MS	By MS/MS	By MS/MS	By MS/MS	By MS/MS	By matching	16.9	23.9	23.9	23.9	13.3	5.8	23363000	2642400	4722700
sp|P05546|HEP2_HUMAN;CON__ENSEMBL:ENSBTAP00000018574	sp|P05546|HEP2_HUMAN	9;1	9;1	9;1	>sp|P05546|HEP2_HUMAN Heparin cofactor 2 OS=Homo sapiens OX=9606 GN=SERPIND1 PE=1 SV=3	2	9	9	9	6	8	5	3	5	3	6	8	5	3	5	3	6	8	5	3	5	3	23.6	23.6	23.6	57.07	499	499;496	0	By MS/MS	By MS/MS	By MS/MS	By MS/MS	By MS/MS	By MS/MS	12	22	8.4	5	8.4	5	67109000	8807900	25095000
tr|F8VZY9|F8VZY9_HUMAN;sp|P05783|K1C18_HUMAN;CON__P05784;CON__H-INV:HIT000015463	tr|F8VZY9|F8VZY9_HUMAN;sp|P05783|K1C18_HUMAN;CON__P05784	7;7;4;1	6;6;3;1	5;5;2;1	>tr|F8VZY9|F8VZY9_HUMAN Keratin, type I cytoskeletal 18 OS=Homo sapiens OX=9606 GN=KRT18 PE=1 SV=1;>sp|P05783|K1C18_HUMAN Keratin, type I cytoskeletal 18 OS=Homo sapiens OX=9606 GN=KRT18 PE=1 SV=2;>P05784 SWISS-PROT:P05784 Tax_Id=10090 Gene_Symbol=Krt18 Ke	4	7	6	5	7	3	6	1	3	3	6	2	5	0	2	2	5	1	4	0	1	1	22.3	20.5	18.2	43.774	391	391;430;423;295	0	By MS/MS	By matching	By MS/MS	By matching	By MS/MS	By matching	22.3	7.2	18.9	1.8	7.2	7.2	18893000	5750400	658790
sp|P06396-2|GELS_HUMAN;sp|P06396-4|GELS_HUMAN;sp|P06396-3|GELS_HUMAN;tr|A0A0A0MS51|A0A0A0MS51_HUMAN;tr|A0A0A0MT01|A0A0A0MT01_HUMAN;sp|P06396|GELS_HUMAN;CON__Q3SX14;tr|A0A0U1RQL8|A0A0U1RQL8_HUMAN;tr|Q5T0I0|Q5T0I0_HUMAN	sp|P06396-2|GELS_HUMAN;sp|P06396-4|GELS_HUMAN;sp|P06396-3|GELS_HUMAN;tr|A0A0A0MS51|A0A0A0MS51_HUMAN;tr|A0A0A0MT01|A0A0A0MT01_HUMAN;sp|P06396|GELS_HUMAN	7;7;7;7;7;7;3;1;1	7;7;7;7;7;7;3;1;1	7;7;7;7;7;7;3;1;1	>sp|P06396-2|GELS_HUMAN Isoform 2 of Gelsolin OS=Homo sapiens OX=9606 GN=GSN;>sp|P06396-4|GELS_HUMAN Isoform 4 of Gelsolin OS=Homo sapiens OX=9606 GN=GSN;>sp|P06396-3|GELS_HUMAN Isoform 3 of Gelsolin OS=Homo sapiens OX=9606 GN=GSN;>tr|A0A0A0MS51|A0A0A0MS51	9	7	7	7	6	5	7	6	6	6	6	5	7	6	6	6	6	5	7	6	6	6	20.2	20.2	20.2	80.64	731	731;739;742;748;767;782;781;232;260	0	By MS/MS	By MS/MS	By MS/MS	By MS/MS	By MS/MS	By MS/MS	16.1	12.6	20.2	16.1	16.8	16.1	82462000	13562000	5130400
tr|F8W079|F8W079_HUMAN;tr|H0YH81|H0YH81_HUMAN;sp|P06576|ATPB_HUMAN	tr|F8W079|F8W079_HUMAN;tr|H0YH81|H0YH81_HUMAN;sp|P06576|ATPB_HUMAN	1;1;1	1;1;1	1;1;1	>tr|F8W079|F8W079_HUMAN ATP synthase subunit beta, mitochondrial (Fragment) OS=Homo sapiens OX=9606 GN=ATP5F1B PE=1 SV=1;>tr|H0YH81|H0YH81_HUMAN ATP synthase subunit beta (Fragment) OS=Homo sapiens OX=9606 GN=ATP5F1B PE=1 SV=1;>sp|P06576|ATPB_HUMAN ATP syn	3	1	1	1	0	0	0	0	1	1	0	0	0	0	1	1	0	0	0	0	1	1	4.2	4.2	4.2	30.17	284	284;362;529	1	By matching	By matching	By matching	By matching	By matching	By MS/MS	0	0	0	0	4.2	4.2	0	0	0
sp|P06681|CO2_HUMAN;sp|P06681-3|CO2_HUMAN;tr|A0A0G2JL69|A0A0G2JL69_HUMAN;tr|A0A0G2JIE7|A0A0G2JIE7_HUMAN;tr|H0Y3H6|H0Y3H6_HUMAN;sp|P06681-2|CO2_HUMAN;tr|B4DQI1|B4DQI1_HUMAN;tr|E9PDZ0|E9PDZ0_HUMAN;tr|A0A0G2JK28|A0A0G2JK28_HUMAN;tr|H0Y868|H0Y868_HUMAN	sp|P06681|CO2_HUMAN;sp|P06681-3|CO2_HUMAN;tr|A0A0G2JL69|A0A0G2JL69_HUMAN;tr|A0A0G2JIE7|A0A0G2JIE7_HUMAN;tr|H0Y3H6|H0Y3H6_HUMAN;sp|P06681-2|CO2_HUMAN;tr|B4DQI1|B4DQI1_HUMAN;tr|E9PDZ0|E9PDZ0_HUMAN;tr|A0A0G2JK28|A0A0G2JK28_HUMAN	19;18;18;17;17;17;16;14;10;4	3;3;3;2;2;2;3;1;1;1	3;3;3;2;2;2;3;1;1;1	>sp|P06681|CO2_HUMAN Complement C2 OS=Homo sapiens OX=9606 GN=C2 PE=1 SV=2;>sp|P06681-3|CO2_HUMAN Isoform 3 of Complement C2 OS=Homo sapiens OX=9606 GN=C2;>tr|A0A0G2JL69|A0A0G2JL69_HUMAN Complement C2 OS=Homo sapiens OX=9606 GN=C2 PE=1 SV=1;>tr|A0A0G2JIE7|	10	19	3	3	11	15	16	14	17	15	2	3	3	3	2	3	2	3	3	3	2	3	28.3	4.1	4.1	83.267	752	752;620;723;525;526;538;506;463;353;160	0	By MS/MS	By MS/MS	By MS/MS	By MS/MS	By MS/MS	By MS/MS	15.3	21.3	24.6	21	25.4	22.9	64366000	4073400	6280800
tr|A0A2R8Y6G6|A0A2R8Y6G6_HUMAN;sp|P06733|ENOA_HUMAN;sp|P06733-2|ENOA_HUMAN;tr|K7EM90|K7EM90_HUMAN;tr|A0A2R8YEM5|A0A2R8YEM5_HUMAN;tr|A0A2R8Y879|A0A2R8Y879_HUMAN;tr|A0A2R8Y798|A0A2R8Y798_HUMAN;tr|K7ERS8|K7ERS8_HUMAN;tr|A0A2R8YEG5|A0A2R8YEG5_HUMAN;tr|F5H0C8|F5H0C8_HUMAN;sp|P09104-2|ENOG_HUMAN;sp|P09104|ENOG_HUMAN;tr|F5H1C3|F5H1C3_HUMAN;tr|E5RI09|E5RI09_HUMAN;tr|E5RG95|E5RG95_HUMAN;tr|K7EPM1|K7EPM1_H…	tr|A0A2R8Y6G6|A0A2R8Y6G6_HUMAN;sp|P06733|ENOA_HUMAN;sp|P06733-2|ENOA_HUMAN	19;19;15;7;5;4;2;2;2;2;2;2;1;1;1;1;1;1	19;19;15;7;5;4;2;2;2;2;2;2;1;1;1;1;1;1	17;17;14;6;4;3;1;1;1;0;0;0;0;0;0;0;0;0	>tr|A0A2R8Y6G6|A0A2R8Y6G6_HUMAN Alpha-enolase OS=Homo sapiens OX=9606 GN=ENO1 PE=4 SV=1;>sp|P06733|ENOA_HUMAN Alpha-enolase OS=Homo sapiens OX=9606 GN=ENO1 PE=1 SV=2;>sp|P06733-2|ENOA_HUMAN Isoform MBP-1 of Alpha-enolase OS=Homo sapiens OX=9606 GN=ENO1	18	19	19	17	15	14	19	17	19	16	15	14	19	17	19	16	14	13	17	16	17	15	62.2	62.2	53	47.327	434	434;434;341;195;171;125;70;83;101;315;391;434;103;148;154;196;212;283	0	By MS/MS	By MS/MS	By MS/MS	By MS/MS	By MS/MS	By MS/MS	52.3	50.7	62.2	57.1	62.2	53.2	276450000	44647000	9821400
sp|P06744|G6PI_HUMAN;sp|P06744-2|G6PI_HUMAN;tr|A0A0A0MTS2|A0A0A0MTS2_HUMAN;tr|K7EQ48|K7EQ48_HUMAN;tr|A0A0J9YXP8|A0A0J9YXP8_HUMAN;tr|A0A0J9YX90|A0A0J9YX90_HUMAN;tr|A0A0J9YYH3|A0A0J9YYH3_HUMAN;tr|A0A2R8Y6C7|A0A2R8Y6C7_HUMAN;tr|K7ENA0|K7ENA0_HUMAN;tr|K7EPY4|K7EPY4_HUMAN;tr|A0A0J9YYI8|A0A0J9YYI8_HUMAN;tr|K7EIL4|K7EIL4_HUMAN;tr|A0A0J9YXH9|A0A0J9YXH9_HUMAN;tr|K7ERK8|K7ERK8_HUMAN;tr|A0A2R8YF08|A0A2R8YF0…	sp|P06744|G6PI_HUMAN;sp|P06744-2|G6PI_HUMAN;tr|A0A0A0MTS2|A0A0A0MTS2_HUMAN;tr|K7EQ48|K7EQ48_HUMAN;tr|A0A0J9YXP8|A0A0J9YXP8_HUMAN;tr|A0A0J9YX90|A0A0J9YX90_HUMAN;tr|A0A0J9YYH3|A0A0J9YYH3_HUMAN;tr|A0A2R8Y6C7|A0A2R8Y6C7_HUMAN	5;5;5;4;3;3;3;3;2;2;1;1;1;1;1;1;1;1;1;1	5;5;5;4;3;3;3;3;2;2;1;1;1;1;1;1;1;1;1;1	5;5;5;4;3;3;3;3;2;2;1;1;1;1;1;1;1;1;1;1	>sp|P06744|G6PI_HUMAN Glucose-6-phosphate isomerase OS=Homo sapiens OX=9606 GN=GPI PE=1 SV=4;>sp|P06744-2|G6PI_HUMAN Isoform 2 of Glucose-6-phosphate isomerase OS=Homo sapiens OX=9606 GN=GPI;>tr|A0A0A0MTS2|A0A0A0MTS2_HUMAN Glucose-6-phosphate isomerase (Fr	20	5	5	5	5	3	4	3	4	4	5	3	4	3	4	4	5	3	4	3	4	4	14.7	14.7	14.7	63.146	558	558;569;573;447;268;279;283;316;162;166;110;116;133;139;145;146;159;161;170;557	0	By MS/MS	By MS/MS	By MS/MS	By MS/MS	By MS/MS	By MS/MS	14.7	8.2	9.9	7.3	9.9	9.9	12214000	3665800	1102500
sp|P06748-2|NPM_HUMAN;sp|P06748|NPM_HUMAN;sp|P06748-3|NPM_HUMAN;tr|E5RI98|E5RI98_HUMAN	sp|P06748-2|NPM_HUMAN;sp|P06748|NPM_HUMAN;sp|P06748-3|NPM_HUMAN	7;7;5;1	7;7;5;1	7;7;5;1	>sp|P06748-2|NPM_HUMAN Isoform 2 of Nucleophosmin OS=Homo sapiens OX=9606 GN=NPM1;>sp|P06748|NPM_HUMAN Nucleophosmin OS=Homo sapiens OX=9606 GN=NPM1 PE=1 SV=2;>sp|P06748-3|NPM_HUMAN Isoform 3 of Nucleophosmin OS=Homo sapiens OX=9606 GN=NPM1	4	7	7	7	4	1	5	6	7	6	4	1	5	6	7	6	4	1	5	6	7	6	38.1	38.1	38.1	29.464	265	265;294;259;111	0	By MS/MS	By MS/MS	By MS/MS	By MS/MS	By MS/MS	By MS/MS	31.7	10.6	32.1	34.7	38.1	34.7	69550000	2880600	0
tr|A0A087WWU8|A0A087WWU8_HUMAN;sp|P06753-2|TPM3_HUMAN;tr|Q5HYB6|Q5HYB6_HUMAN;sp|P06753-5|TPM3_HUMAN;tr|Q5VU61|Q5VU61_HUMAN;sp|P06753-3|TPM3_HUMAN;sp|P06753-6|TPM3_HUMAN;tr|J3KN67|J3KN67_HUMAN;sp|P06753-4|TPM3_HUMAN;tr|D6R904|D6R904_HUMAN;sp|P06753-7|TPM3_HUMAN;tr|D6RFM2|D6RFM2_HUMAN	tr|A0A087WWU8|A0A087WWU8_HUMAN;sp|P06753-2|TPM3_HUMAN;tr|Q5HYB6|Q5HYB6_HUMAN;sp|P06753-5|TPM3_HUMAN;tr|Q5VU61|Q5VU61_HUMAN;sp|P06753-3|TPM3_HUMAN;sp|P06753-6|TPM3_HUMAN;tr|J3KN67|J3KN67_HUMAN;sp|P06753-4|TPM3_HUMAN;tr|D6R904|D6R904_HUMAN	9;9;8;8;7;7;7;7;6;5;3;2	9;9;8;8;7;7;7;7;6;5;3;2	5;5;5;4;5;3;3;3;2;2;2;2	>tr|A0A087WWU8|A0A087WWU8_HUMAN Tropomyosin alpha-3 chain OS=Homo sapiens OX=9606 GN=TPM3 PE=1 SV=1;>sp|P06753-2|TPM3_HUMAN Isoform 2 of Tropomyosin alpha-3 chain OS=Homo sapiens OX=9606 GN=TPM3;>tr|Q5HYB6|Q5HYB6_HUMAN Epididymis luminal protein 189 OS=Hom	12	9	9	5	7	4	8	6	7	8	7	4	8	6	7	8	4	1	4	2	4	4	40.1	40.1	21.6	26.42	227	227;248;232;248;223;247;248;285;247;95;158;49	0	By MS/MS	By matching	By MS/MS	By MS/MS	By MS/MS	By MS/MS	36.1	26.4	36.1	31.7	35.7	40.1	144630000	27753000	2899900
sp|P07225|PROS_HUMAN;tr|G5E9F8|G5E9F8_HUMAN;tr|H7BXT0|H7BXT0_HUMAN	sp|P07225|PROS_HUMAN;tr|G5E9F8|G5E9F8_HUMAN	4;3;1	4;3;1	4;3;1	>sp|P07225|PROS_HUMAN Vitamin K-dependent protein S OS=Homo sapiens OX=9606 GN=PROS1 PE=1 SV=1;>tr|G5E9F8|G5E9F8_HUMAN Protein S (Alpha), isoform CRA_b OS=Homo sapiens OX=9606 GN=PROS1 PE=1 SV=1	3	4	4	4	3	4	3	4	4	4	3	4	3	4	4	4	3	4	3	4	4	4	7.2	7.2	7.2	75.122	676	676;545;231	0	By MS/MS	By MS/MS	By matching	By matching	By MS/MS	By matching	4.7	7.2	5.6	7.2	7.2	7.2	36140000	3509500	5106800
sp|P07237|PDIA1_HUMAN;tr|H7BZ94|H7BZ94_HUMAN;tr|I3L398|I3L398_HUMAN;tr|H0Y3Z3|H0Y3Z3_HUMAN;tr|I3L312|I3L312_HUMAN;tr|I3L3U6|I3L3U6_HUMAN;tr|I3L4M2|I3L4M2_HUMAN;tr|I3NI03|I3NI03_HUMAN;tr|I3L0S0|I3L0S0_HUMAN;tr|I3L3P5|I3L3P5_HUMAN;tr|I3L1Y5|I3L1Y5_HUMAN;tr|I3L514|I3L514_HUMAN	sp|P07237|PDIA1_HUMAN;tr|H7BZ94|H7BZ94_HUMAN;tr|I3L398|I3L398_HUMAN;tr|H0Y3Z3|H0Y3Z3_HUMAN	14;13;7;7;6;4;3;3;2;2;1;1	14;13;7;7;6;4;3;3;2;2;1;1	14;13;7;7;6;4;3;3;2;2;1;1	>sp|P07237|PDIA1_HUMAN Protein disulfide-isomerase OS=Homo sapiens OX=9606 GN=P4HB PE=1 SV=3;>tr|H7BZ94|H7BZ94_HUMAN Protein disulfide-isomerase OS=Homo sapiens OX=9606 GN=P4HB PE=1 SV=2;>tr|I3L398|I3L398_HUMAN Protein disulfide-isomerase (Fragment) OS=Hom	12	14	14	14	13	8	11	11	10	9	13	8	11	11	10	9	13	8	11	11	10	9	41.5	41.5	41.5	57.116	508	508;464;200;274;208;188;117;166;148;156;54;106	0	By MS/MS	By MS/MS	By MS/MS	By MS/MS	By MS/MS	By MS/MS	36.6	20.1	33.3	31.3	28.1	25	82671000	37807000	5435900
tr|A0A1B0GW44|A0A1B0GW44_HUMAN;tr|A0A1B0GV23|A0A1B0GV23_HUMAN;tr|A0A1B0GVD5|A0A1B0GVD5_HUMAN;tr|A0A1B0GWE8|A0A1B0GWE8_HUMAN;sp|P07339|CATD_HUMAN;tr|A0A1B0GU92|A0A1B0GU92_HUMAN;tr|A0A1B0GU03|A0A1B0GU03_HUMAN;tr|A0A1B0GVP3|A0A1B0GVP3_HUMAN;tr|F8WD96|F8WD96_HUMAN;tr|C9JH19|C9JH19_HUMAN;tr|H7C469|H7C469_HUMAN;tr|H7C1V0|H7C1V0_HUMAN;tr|F8W787|F8W787_HUMAN	tr|A0A1B0GW44|A0A1B0GW44_HUMAN;tr|A0A1B0GV23|A0A1B0GV23_HUMAN;tr|A0A1B0GVD5|A0A1B0GVD5_HUMAN;tr|A0A1B0GWE8|A0A1B0GWE8_HUMAN;sp|P07339|CATD_HUMAN;tr|A0A1B0GU92|A0A1B0GU92_HUMAN;tr|A0A1B0GU03|A0A1B0GU03_HUMAN;tr|A0A1B0GVP3|A0A1B0GVP3_HUMAN;tr|F8WD96|F8WD96_HUMAN;tr|C9JH19|C9JH19_HUMAN;tr|H7C469|H7C469_HUMAN	8;8;8;8;8;7;7;6;5;5;5;3;3	8;8;8;8;8;7;7;6;5;5;5;3;3	8;8;8;8;8;7;7;6;5;5;5;3;3	>tr|A0A1B0GW44|A0A1B0GW44_HUMAN Cathepsin D OS=Homo sapiens OX=9606 GN=CTSD PE=1 SV=1;>tr|A0A1B0GV23|A0A1B0GV23_HUMAN Cathepsin D OS=Homo sapiens OX=9606 GN=CTSD PE=1 SV=1;>tr|A0A1B0GVD5|A0A1B0GVD5_HUMAN Cathepsin D OS=Homo sapiens OX=9606 GN=CTSD PE=1 SV=	13	8	8	8	6	3	5	5	5	5	6	3	5	5	5	5	6	3	5	5	5	5	27.4	27.4	27.4	43.688	405	405;406;409;410;412;557;582;405;276;299;336;189;199	0	By MS/MS	By matching	By MS/MS	By MS/MS	By MS/MS	By MS/MS	20.5	10.4	18	17.3	16	16	11739000	4329300	440760
tr|Q5JP53|Q5JP53_HUMAN;sp|P07437|TBB5_HUMAN;tr|Q5ST81|Q5ST81_HUMAN	tr|Q5JP53|Q5JP53_HUMAN;sp|P07437|TBB5_HUMAN;tr|Q5ST81|Q5ST81_HUMAN	17;17;16	3;3;2	2;2;2	>tr|Q5JP53|Q5JP53_HUMAN Tubulin beta chain OS=Homo sapiens OX=9606 GN=TUBB PE=1 SV=1;>sp|P07437|TBB5_HUMAN Tubulin beta chain OS=Homo sapiens OX=9606 GN=TUBB PE=1 SV=2;>tr|Q5ST81|Q5ST81_HUMAN Tubulin beta chain OS=Homo sapiens OX=9606 GN=TUBB PE=1 SV=1	3	17	3	2	14	11	17	16	15	15	3	3	3	3	3	3	2	2	2	2	2	2	50.7	11	7.5	47.766	426	426;444;372	0	By MS/MS	By MS/MS	By MS/MS	By MS/MS	By MS/MS	By MS/MS	42.7	38	50.7	50.7	48.8	48.6	15782000	3251400	798160
sp|P07602|SAP_HUMAN;sp|P07602-2|SAP_HUMAN;tr|C9JIZ6|C9JIZ6_HUMAN;sp|P07602-3|SAP_HUMAN;tr|Q5BJH1|Q5BJH1_HUMAN	sp|P07602|SAP_HUMAN;sp|P07602-2|SAP_HUMAN;tr|C9JIZ6|C9JIZ6_HUMAN;sp|P07602-3|SAP_HUMAN	5;5;5;5;2	5;5;5;5;2	5;5;5;5;2	>sp|P07602|SAP_HUMAN Prosaposin OS=Homo sapiens OX=9606 GN=PSAP PE=1 SV=2;>sp|P07602-2|SAP_HUMAN Isoform Sap-mu-6 of Prosaposin OS=Homo sapiens OX=9606 GN=PSAP;>tr|C9JIZ6|C9JIZ6_HUMAN Prosaposin OS=Homo sapiens OX=9606 GN=PSAP PE=1 SV=2;>sp|P07602-3|SAP_HU	5	5	5	5	3	1	4	3	5	3	3	1	4	3	5	3	3	1	4	3	5	3	16.6	16.6	16.6	58.112	524	524;526;527;527;240	0	By MS/MS	By MS/MS	By MS/MS	By matching	By MS/MS	By MS/MS	11.8	2.9	14.9	8.4	16.6	7.3	16744000	604320	475040
sp|P07858|CATB_HUMAN;tr|R4GMQ5|R4GMQ5_HUMAN;tr|E9PS78|E9PS78_HUMAN;tr|E9PR54|E9PR54_HUMAN;tr|E9PJ67|E9PJ67_HUMAN;tr|E9PCB3|E9PCB3_HUMAN;tr|E9PKQ7|E9PKQ7_HUMAN;tr|E9PNL5|E9PNL5_HUMAN;tr|E9PHZ5|E9PHZ5_HUMAN;tr|E9PLY3|E9PLY3_HUMAN;tr|E9PSG5|E9PSG5_HUMAN;tr|E9PQM1|E9PQM1_HUMAN	sp|P07858|CATB_HUMAN	3;1;1;1;1;1;1;1;1;1;1;1	3;1;1;1;1;1;1;1;1;1;1;1	3;1;1;1;1;1;1;1;1;1;1;1	>sp|P07858|CATB_HUMAN Cathepsin B OS=Homo sapiens OX=9606 GN=CTSB PE=1 SV=3	12	3	3	3	2	2	3	2	2	3	2	2	3	2	2	3	2	2	3	2	2	3	14.2	14.2	14.2	37.821	339	339;76;92;98;101;110;136;143;148;165;170;175	0	By MS/MS	By MS/MS	By MS/MS	By matching	By MS/MS	By MS/MS	10	10	14.2	9.4	9.4	14.2	5936200	0	0
sp|P07900|HS90A_HUMAN;sp|P07900-2|HS90A_HUMAN;tr|G3V2J8|G3V2J8_HUMAN;sp|Q14568|HS902_HUMAN;sp|Q58FG0|HS905_HUMAN	sp|P07900|HS90A_HUMAN;sp|P07900-2|HS90A_HUMAN	23;23;6;3;2	16;16;4;0;2	16;16;4;0;2	>sp|P07900|HS90A_HUMAN Heat shock protein HSP 90-alpha OS=Homo sapiens OX=9606 GN=HSP90AA1 PE=1 SV=5;>sp|P07900-2|HS90A_HUMAN Isoform 2 of Heat shock protein HSP 90-alpha OS=Homo sapiens OX=9606 GN=HSP90AA1	5	23	16	16	18	12	21	18	20	19	11	8	14	11	13	12	11	8	14	11	13	12	39.6	28.6	28.6	84.659	732	732;854;174;343;334	0	By MS/MS	By MS/MS	By MS/MS	By MS/MS	By MS/MS	By MS/MS	29.2	20.9	37.2	30.7	34.3	34.3	261580000	36035000	2958900
tr|G3V5X6|G3V5X6_HUMAN;tr|G3V3K6|G3V3K6_HUMAN;tr|G3V251|G3V251_HUMAN;tr|B4DSU6|B4DSU6_HUMAN;tr|G3V555|G3V555_HUMAN;tr|G3V575|G3V575_HUMAN;tr|G3V576|G3V576_HUMAN;sp|P07910-4|HNRPC_HUMAN;tr|G3V4W0|G3V4W0_HUMAN;tr|B4DY08|B4DY08_HUMAN;tr|B2R5W2|B2R5W2_HUMAN;tr|G3V4C1|G3V4C1_HUMAN;sp|P07910-2|HNRPC_HUMAN;tr|G3V2Q1|G3V2Q1_HUMAN;sp|P07910|HNRPC_HUMAN;tr|G3V2H6|G3V2H6_HUMAN;tr|G3V4M8|G3V4M8_HUMAN;sp|P079…	tr|G3V5X6|G3V5X6_HUMAN;tr|G3V3K6|G3V3K6_HUMAN;tr|G3V251|G3V251_HUMAN;tr|B4DSU6|B4DSU6_HUMAN;tr|G3V555|G3V555_HUMAN;tr|G3V575|G3V575_HUMAN;tr|G3V576|G3V576_HUMAN;sp|P07910-4|HNRPC_HUMAN;tr|G3V4W0|G3V4W0_HUMAN;tr|B4DY08|B4DY08_HUMAN;tr|B2R5W2|B2R5W2_HUMAN;tr|G3V4C1|G3V4C1_HUMAN;sp|P07910-2|HNRPC_HUMAN;tr|G3V2Q1|G3V2Q1_HUMAN;sp|P07910|HNRPC_HUMAN;tr|G3V2H6|G3V2H6_HUMAN;tr|G3V4M8|G3V4M8_HUMAN;sp|P079…	2;2;2;2;2;2;2;2;2;2;2;2;2;2;2;1;1;1;1;1;1;1;1;1	2;2;2;2;2;2;2;2;2;2;2;2;2;2;2;1;1;1;1;1;1;1;1;1	2;2;2;2;2;2;2;2;2;2;2;2;2;2;2;1;1;1;1;1;1;1;1;1	>tr|G3V5X6|G3V5X6_HUMAN Heterogeneous nuclear ribonucleoproteins C1/C2 (Fragment) OS=Homo sapiens OX=9606 GN=HNRNPC PE=1 SV=1;>tr|G3V3K6|G3V3K6_HUMAN Heterogeneous nuclear ribonucleoproteins C1/C2 (Fragment) OS=Homo sapiens OX=9606 GN=HNRNPC PE=1 SV=1;>tr|	24	2	2	2	1	0	2	1	2	2	1	0	2	1	2	2	1	0	2	1	2	2	23.9	23.9	23.9	12.78	117	117;121;126;147;175;187;231;250;262;288;290;292;293;305;306;54;66;226;293;293;293;293;293;293	0	By matching	By matching	By matching	By matching	By MS/MS	By MS/MS	10.3	0	23.9	10.3	23.9	23.9	2889500	204820	0
sp|P07942|LAMB1_HUMAN;tr|G3XAI2|G3XAI2_HUMAN;tr|E7EPA6|E7EPA6_HUMAN	sp|P07942|LAMB1_HUMAN;tr|G3XAI2|G3XAI2_HUMAN	3;3;1	3;3;1	3;3;1	>sp|P07942|LAMB1_HUMAN Laminin subunit beta-1 OS=Homo sapiens OX=9606 GN=LAMB1 PE=1 SV=2;>tr|G3XAI2|G3XAI2_HUMAN Laminin subunit beta-1 OS=Homo sapiens OX=9606 GN=LAMB1 PE=1 SV=1	3	3	3	3	0	0	3	2	2	2	0	0	3	2	2	2	0	0	3	2	2	2	3	3	3	198.04	1786	1786;1810;850	0	By matching	By matching	By MS/MS	By matching	By matching	By MS/MS	0	0	3	2.2	2	2	4108300	0	0
sp|P07954-2|FUMH_HUMAN;sp|P07954|FUMH_HUMAN	sp|P07954-2|FUMH_HUMAN;sp|P07954|FUMH_HUMAN	2;2	2;2	2;2	>sp|P07954-2|FUMH_HUMAN Isoform Cytoplasmic of Fumarate hydratase, mitochondrial OS=Homo sapiens OX=9606 GN=FH;>sp|P07954|FUMH_HUMAN Fumarate hydratase, mitochondrial OS=Homo sapiens OX=9606 GN=FH PE=1 SV=3	2	2	2	2	0	0	1	1	2	1	0	0	1	1	2	1	0	0	1	1	2	1	9.2	9.2	9.2	50.212	467	467;510	0	By matching	By matching	By MS/MS	By matching	By MS/MS	By matching	0	0	4.3	4.3	9.2	4.3	1090600	0	0
sp|P07996|TSP1_HUMAN;sp|P07996-2|TSP1_HUMAN;CON__Q28194;tr|A8MZG1|A8MZG1_HUMAN	sp|P07996|TSP1_HUMAN;sp|P07996-2|TSP1_HUMAN;CON__Q28194	9;8;7;1	9;8;7;1	9;8;7;1	>sp|P07996|TSP1_HUMAN Thrombospondin-1 OS=Homo sapiens OX=9606 GN=THBS1 PE=1 SV=2;>sp|P07996-2|TSP1_HUMAN Isoform 2 of Thrombospondin-1 OS=Homo sapiens OX=9606 GN=THBS1;>Q28194 TREMBL:Q28194 (Bos taurus) Thrombospondin-1	4	9	9	9	6	8	3	4	8	5	6	8	3	4	8	5	6	8	3	4	8	5	10.9	10.9	10.9	129.38	1170	1170;1085;1170;94	0	By MS/MS	By MS/MS	By MS/MS	By MS/MS	By MS/MS	By MS/MS	7	10	3.2	4.5	9	6	66542000	10798000	11068000
sp|P08185|CBG_HUMAN;tr|G3V350|G3V350_HUMAN;tr|G3V4V7|G3V4V7_HUMAN	sp|P08185|CBG_HUMAN	6;2;1	6;2;1	6;2;1	>sp|P08185|CBG_HUMAN Corticosteroid-binding globulin OS=Homo sapiens OX=9606 GN=SERPINA6 PE=1 SV=1	3	6	6	6	3	6	3	2	3	2	3	6	3	2	3	2	3	6	3	2	3	2	22.2	22.2	22.2	45.14	405	405;278;136	0	By MS/MS	By MS/MS	By MS/MS	By MS/MS	By MS/MS	By MS/MS	10.9	22.2	10.9	6.4	10.9	6.4	32886000	3466200	17002000
sp|P08238|HS90B_HUMAN;sp|Q58FF7|H90B3_HUMAN	sp|P08238|HS90B_HUMAN	28;4	28;4	18;2	>sp|P08238|HS90B_HUMAN Heat shock protein HSP 90-beta OS=Homo sapiens OX=9606 GN=HSP90AB1 PE=1 SV=4	2	28	28	18	24	14	27	24	27	23	24	14	27	24	27	23	14	7	17	15	17	13	43.6	43.6	30.5	83.263	724	724;597	0	By MS/MS	By MS/MS	By MS/MS	By MS/MS	By MS/MS	By MS/MS	36.5	23.1	42.1	41.2	43.6	38	647790000	142570000	13104000
sp|P08697|A2AP_HUMAN;sp|P08697-2|A2AP_HUMAN;tr|A0A0G2JPA8|A0A0G2JPA8_HUMAN;tr|C9JMH6|C9JMH6_HUMAN;tr|A0A0J9YY65|A0A0J9YY65_HUMAN;tr|C9JPV4|C9JPV4_HUMAN;tr|A0A0J9YWQ3|A0A0J9YWQ3_HUMAN	sp|P08697|A2AP_HUMAN;sp|P08697-2|A2AP_HUMAN;tr|A0A0G2JPA8|A0A0G2JPA8_HUMAN;tr|C9JMH6|C9JMH6_HUMAN	13;12;11;7;6;6;5	13;12;11;7;6;6;5	12;11;10;6;5;6;5	>sp|P08697|A2AP_HUMAN Alpha-2-antiplasmin OS=Homo sapiens OX=9606 GN=SERPINF2 PE=1 SV=3;>sp|P08697-2|A2AP_HUMAN Isoform 2 of Alpha-2-antiplasmin OS=Homo sapiens OX=9606 GN=SERPINF2;>tr|A0A0G2JPA8|A0A0G2JPA8_HUMAN Alpha-2-antiplasmin OS=Homo sapiens OX=9606	7	13	13	12	9	12	11	9	10	8	9	12	11	9	10	8	8	11	10	8	9	7	43.8	43.8	41.5	54.565	491	491;427;427;255;255;264;264	0	By MS/MS	By MS/MS	By MS/MS	By MS/MS	By MS/MS	By MS/MS	26.3	38.9	35	27.5	32.4	23.6	284410000	27718000	29281000
tr|C9J6H2|C9J6H2_HUMAN;tr|C9JXF9|C9JXF9_HUMAN;sp|P08833|IBP1_HUMAN	tr|C9J6H2|C9J6H2_HUMAN;tr|C9JXF9|C9JXF9_HUMAN;sp|P08833|IBP1_HUMAN	4;4;4	4;4;4	4;4;4	>tr|C9J6H2|C9J6H2_HUMAN Insulin-like growth factor-binding protein 1 OS=Homo sapiens OX=9606 GN=IGFBP1 PE=1 SV=1;>tr|C9JXF9|C9JXF9_HUMAN Insulin-like growth factor-binding protein 1 OS=Homo sapiens OX=9606 GN=IGFBP1 PE=1 SV=1;>sp|P08833|IBP1_HUMAN Insulin-	3	4	4	4	3	0	4	4	4	4	3	0	4	4	4	4	3	0	4	4	4	4	24.1	24.1	24.1	22.886	216	216;257;259	0	By MS/MS	By matching	By MS/MS	By matching	By MS/MS	By MS/MS	16.7	0	24.1	24.1	24.1	24.1	67602000	4257000	0
tr|C9J9K3|C9J9K3_HUMAN;sp|P08865|RSSA_HUMAN;tr|A0A0C4DG17|A0A0C4DG17_HUMAN;tr|F8WD59|F8WD59_HUMAN	tr|C9J9K3|C9J9K3_HUMAN;sp|P08865|RSSA_HUMAN;tr|A0A0C4DG17|A0A0C4DG17_HUMAN;tr|F8WD59|F8WD59_HUMAN	4;4;4;2	4;4;4;2	4;4;4;2	>tr|C9J9K3|C9J9K3_HUMAN 40S ribosomal protein SA (Fragment) OS=Homo sapiens OX=9606 GN=RPSA PE=1 SV=8;>sp|P08865|RSSA_HUMAN 40S ribosomal protein SA OS=Homo sapiens OX=9606 GN=RPSA PE=1 SV=4;>tr|A0A0C4DG17|A0A0C4DG17_HUMAN 40S ribosomal protein SA OS=Homo	4	4	4	4	2	1	4	1	4	3	2	1	4	1	4	3	2	1	4	1	4	3	20.2	20.2	20.2	29.404	263	263;295;300;116	0	By MS/MS	By matching	By matching	By matching	By MS/MS	By MS/MS	9.5	3	20.2	6.5	20.2	15.2	21932000	2863700	327590
tr|E9PKT6|E9PKT6_HUMAN;tr|A0A087X0D5|A0A087X0D5_HUMAN;sp|P09668|CATH_HUMAN	tr|E9PKT6|E9PKT6_HUMAN;tr|A0A087X0D5|A0A087X0D5_HUMAN;sp|P09668|CATH_HUMAN	1;1;1	1;1;1	1;1;1	>tr|E9PKT6|E9PKT6_HUMAN Pro-cathepsin H (Fragment) OS=Homo sapiens OX=9606 GN=CTSH PE=1 SV=1;>tr|A0A087X0D5|A0A087X0D5_HUMAN Pro-cathepsin H OS=Homo sapiens OX=9606 GN=CTSH PE=1 SV=1;>sp|P09668|CATH_HUMAN Pro-cathepsin H OS=Homo sapiens OX=9606 GN=CTSH PE=	3	1	1	1	1	1	1	1	1	0	1	1	1	1	1	0	1	1	1	1	1	0	9.7	9.7	9.7	14.735	134	134;323;335	0.0034602	By matching	By MS/MS	By matching	By matching	By matching	By matching	9.7	9.7	9.7	9.7	9.7	0	0	0	0
tr|A0A087WU64|A0A087WU64_HUMAN;sp|P09884|DPOLA_HUMAN;tr|A6NMQ1|A6NMQ1_HUMAN	tr|A0A087WU64|A0A087WU64_HUMAN;sp|P09884|DPOLA_HUMAN;tr|A6NMQ1|A6NMQ1_HUMAN	1;1;1	1;1;1	1;1;1	>tr|A0A087WU64|A0A087WU64_HUMAN DNA polymerase OS=Homo sapiens OX=9606 GN=POLA1 PE=1 SV=1;>sp|P09884|DPOLA_HUMAN DNA polymerase alpha catalytic subunit OS=Homo sapiens OX=9606 GN=POLA1 PE=1 SV=2;>tr|A6NMQ1|A6NMQ1_HUMAN DNA polymerase OS=Homo sapiens OX=960	3	1	1	1	0	0	0	1	1	1	0	0	0	1	1	1	0	0	0	1	1	1	0.8	0.8	0.8	165.77	1461	1461;1462;1468	1	By matching	By matching	By matching	By matching	By MS/MS	By matching	0	0	0	0.8	0.8	0.8	0	0	0
sp|P0C0L5|CO4B_HUMAN;tr|F5GXS0|F5GXS0_HUMAN;tr|A0A0G2JL54|A0A0G2JL54_HUMAN;tr|A0A140TA29|A0A140TA29_HUMAN	sp|P0C0L5|CO4B_HUMAN;tr|F5GXS0|F5GXS0_HUMAN;tr|A0A0G2JL54|A0A0G2JL54_HUMAN;tr|A0A140TA29|A0A140TA29_HUMAN	73;70;70;69	73;70;70;69	2;2;2;2	>sp|P0C0L5|CO4B_HUMAN Complement C4-B OS=Homo sapiens OX=9606 GN=C4B PE=1 SV=2;>tr|F5GXS0|F5GXS0_HUMAN Complement C4-B OS=Homo sapiens OX=9606 GN=C4B PE=1 SV=1;>tr|A0A0G2JL54|A0A0G2JL54_HUMAN Complement C4-B OS=Homo sapiens OX=9606 GN=C4B_2 PE=1 SV=1;>tr|A	4	73	73	2	58	55	66	63	71	60	58	55	66	63	71	60	2	2	2	1	2	1	51	51	2.2	192.75	1744	1744;1698;1698;1698	0	By MS/MS	By MS/MS	By MS/MS	By MS/MS	By MS/MS	By MS/MS	43.9	42.7	45.8	46.2	50.9	42.8	3207500000	259420000	372510000
sp|Q99878|H2A1J_HUMAN;sp|Q96KK5|H2A1H_HUMAN;sp|Q9BTM1|H2AJ_HUMAN;sp|Q16777|H2A2C_HUMAN;sp|Q6FI13|H2A2A_HUMAN;sp|P20671|H2A1D_HUMAN;sp|P0C0S8|H2A1_HUMAN;tr|A0A0U1RR32|A0A0U1RR32_HUMAN;tr|A0A0U1RRH7|A0A0U1RRH7_HUMAN;tr|H0YFX9|H0YFX9_HUMAN;sp|Q93077|H2A1C_HUMAN;sp|Q7L7L0|H2A3_HUMAN;sp|P04908|H2A1B_HUMAN;sp|Q9BTM1-2|H2AJ_HUMAN;sp|Q96QV6|H2A1A_HUMAN;sp|P16104|H2AX_HUMAN;sp|Q71UI9-2|H2AV_HUMAN;tr|C9J0D…	sp|Q99878|H2A1J_HUMAN;sp|Q96KK5|H2A1H_HUMAN;sp|Q9BTM1|H2AJ_HUMAN;sp|Q16777|H2A2C_HUMAN;sp|Q6FI13|H2A2A_HUMAN;sp|P20671|H2A1D_HUMAN;sp|P0C0S8|H2A1_HUMAN;tr|A0A0U1RR32|A0A0U1RR32_HUMAN;tr|A0A0U1RRH7|A0A0U1RRH7_HUMAN;tr|H0YFX9|H0YFX9_HUMAN;sp|Q93077|H2A1C_HUMAN;sp|Q7L7L0|H2A3_HUMAN;sp|P04908|H2A1B_HUMAN;sp|Q9BTM1-2|H2AJ_HUMAN;sp|Q96QV6|H2A1A_HUMAN;sp|P16104|H2AX_HUMAN	5;5;5;5;5;5;5;5;5;4;4;4;4;4;3;3;2;2;2;2;1;1;1;1;1	5;5;5;5;5;5;5;5;5;4;4;4;4;4;3;3;2;2;2;2;1;1;1;1;1	5;5;5;5;5;5;5;5;5;4;4;4;4;4;3;3;2;2;2;2;1;1;1;1;1	>sp|Q99878|H2A1J_HUMAN Histone H2A type 1-J OS=Homo sapiens OX=9606 GN=HIST1H2AJ PE=1 SV=3;>sp|Q96KK5|H2A1H_HUMAN Histone H2A type 1-H OS=Homo sapiens OX=9606 GN=HIST1H2AH PE=1 SV=3;>sp|Q9BTM1|H2AJ_HUMAN Histone H2A.J OS=Homo sapiens OX=9606 GN=H2AFJ PE=1	25	5	5	5	4	3	5	5	5	5	4	3	5	5	5	5	4	3	5	5	5	5	35.9	35.9	35.9	13.936	128	128;128;129;129;130;130;130;169;170;92;130;130;130;151;131;143;114;122;128;128;66;76;90;102;130	0	By MS/MS	By MS/MS	By MS/MS	By MS/MS	By MS/MS	By MS/MS	35.9	27.3	35.9	35.9	35.9	35.9	107870000	8077300	2879500
sp|Q01105-3|SET_HUMAN;tr|A0A0C4DFV9|A0A0C4DFV9_HUMAN;sp|Q01105-4|SET_HUMAN;sp|Q01105-2|SET_HUMAN;sp|Q01105|SET_HUMAN;tr|A0A087X027|A0A087X027_HUMAN;sp|P0DME0|SETLP_HUMAN	sp|Q01105-3|SET_HUMAN;tr|A0A0C4DFV9|A0A0C4DFV9_HUMAN;sp|Q01105-4|SET_HUMAN;sp|Q01105-2|SET_HUMAN;sp|Q01105|SET_HUMAN;tr|A0A087X027|A0A087X027_HUMAN;sp|P0DME0|SETLP_HUMAN	2;2;2;2;2;2;2	2;2;2;2;2;2;2	2;2;2;2;2;2;2	>sp|Q01105-3|SET_HUMAN Isoform 3 of Protein SET OS=Homo sapiens OX=9606 GN=SET;>tr|A0A0C4DFV9|A0A0C4DFV9_HUMAN Protein SET OS=Homo sapiens OX=9606 GN=SET PE=1 SV=1;>sp|Q01105-4|SET_HUMAN Isoform 4 of Protein SET OS=Homo sapiens OX=9606 GN=SET;>sp|Q01105-2|	7	2	2	2	2	2	2	2	1	1	2	2	2	2	1	1	2	2	2	2	1	1	10.2	10.2	10.2	30.992	265	265;266;268;277;290;292;302	0	By MS/MS	By matching	By matching	By matching	By MS/MS	By matching	10.2	10.2	10.2	10.2	4.9	4.9	11241000	1416500	302960
sp|P0DMV9|HS71B_HUMAN;sp|P0DMV8|HS71A_HUMAN;tr|A0A0G2JIW1|A0A0G2JIW1_HUMAN;sp|P0DMV8-2|HS71A_HUMAN;tr|V9GZ37|V9GZ37_HUMAN;tr|Q53FA3|Q53FA3_HUMAN;sp|P34931|HS71L_HUMAN	sp|P0DMV9|HS71B_HUMAN;sp|P0DMV8|HS71A_HUMAN;tr|A0A0G2JIW1|A0A0G2JIW1_HUMAN;sp|P0DMV8-2|HS71A_HUMAN	13;13;13;11;5;4;4	12;12;12;10;5;3;3	10;10;10;8;4;3;3	>sp|P0DMV9|HS71B_HUMAN Heat shock 70 kDa protein 1B OS=Homo sapiens OX=9606 GN=HSPA1B PE=1 SV=1;>sp|P0DMV8|HS71A_HUMAN Heat shock 70 kDa protein 1A OS=Homo sapiens OX=9606 GN=HSPA1A PE=1 SV=1;>tr|A0A0G2JIW1|A0A0G2JIW1_HUMAN Heat shock 70 kDa protein 1B OS=	7	13	12	10	13	8	12	11	13	12	12	7	11	10	12	11	10	6	9	8	10	9	22.8	20.7	16.4	70.051	641	641;641;642;586;476;641;641	0	By MS/MS	By MS/MS	By MS/MS	By MS/MS	By MS/MS	By MS/MS	22.8	16.2	20.6	20.6	22.8	20.6	105050000	37804000	2483100
sp|P10451-3|OSTP_HUMAN;sp|P10451-4|OSTP_HUMAN;sp|P10451-5|OSTP_HUMAN;sp|P10451-2|OSTP_HUMAN;sp|P10451|OSTP_HUMAN;tr|D6R9C5|D6R9C5_HUMAN;CON__P31096	sp|P10451-3|OSTP_HUMAN;sp|P10451-4|OSTP_HUMAN;sp|P10451-5|OSTP_HUMAN;sp|P10451-2|OSTP_HUMAN;sp|P10451|OSTP_HUMAN;tr|D6R9C5|D6R9C5_HUMAN	3;3;3;3;3;2;1	3;3;3;3;3;2;1	3;3;3;3;3;2;1	>sp|P10451-3|OSTP_HUMAN Isoform C of Osteopontin OS=Homo sapiens OX=9606 GN=SPP1;>sp|P10451-4|OSTP_HUMAN Isoform D of Osteopontin OS=Homo sapiens OX=9606 GN=SPP1;>sp|P10451-5|OSTP_HUMAN Isoform 5 of Osteopontin OS=Homo sapiens OX=9606 GN=SPP1;>sp|P10451-2|	7	3	3	3	2	3	2	3	0	1	2	3	2	3	0	1	2	3	2	3	0	1	13.6	13.6	13.6	32.355	287	287;292;300;300;314;241;262	0	By matching	By MS/MS	By MS/MS	By MS/MS	By matching	By matching	10.5	13.6	10.5	13.6	0	4.5	13887000	1287400	5228200
sp|P10599|THIO_HUMAN	sp|P10599|THIO_HUMAN	1	1	1	>sp|P10599|THIO_HUMAN Thioredoxin OS=Homo sapiens OX=9606 GN=TXN PE=1 SV=3	1	1	1	1	1	0	1	1	1	0	1	0	1	1	1	0	1	0	1	1	1	0	11.4	11.4	11.4	11.737	105	105	1	By MS/MS	By matching	By matching	By matching	By matching	By matching	11.4	0	11.4	11.4	11.4	0	0	0	0
sp|P10646|TFPI1_HUMAN;sp|P10646-2|TFPI1_HUMAN;tr|C9JT76|C9JT76_HUMAN;tr|C9JQ14|C9JQ14_HUMAN;tr|C9JKV3|C9JKV3_HUMAN	sp|P10646|TFPI1_HUMAN;sp|P10646-2|TFPI1_HUMAN	6;3;2;2;2	6;3;2;2;2	6;3;2;2;2	>sp|P10646|TFPI1_HUMAN Tissue factor pathway inhibitor OS=Homo sapiens OX=9606 GN=TFPI PE=1 SV=1;>sp|P10646-2|TFPI1_HUMAN Isoform Beta of Tissue factor pathway inhibitor OS=Homo sapiens OX=9606 GN=TFPI	5	6	6	6	3	1	6	6	6	5	3	1	6	6	6	5	3	1	6	6	6	5	27	27	27	35.015	304	304;251;105;106;215	0	By MS/MS	By matching	By MS/MS	By MS/MS	By MS/MS	By MS/MS	10.2	3	27	27	27	24.3	146420000	4562400	859850
sp|P10809|CH60_HUMAN;tr|E7ESH4|E7ESH4_HUMAN;tr|E7EXB4|E7EXB4_HUMAN;sp|P10809-2|CH60_HUMAN;tr|C9JL25|C9JL25_HUMAN;tr|C9JL19|C9JL19_HUMAN;tr|C9JCQ4|C9JCQ4_HUMAN;tr|C9J0S9|C9J0S9_HUMAN	sp|P10809|CH60_HUMAN	23;7;6;3;3;2;2;1	23;7;6;3;3;2;2;1	23;7;6;3;3;2;2;1	>sp|P10809|CH60_HUMAN 60 kDa heat shock protein, mitochondrial OS=Homo sapiens OX=9606 GN=HSPD1 PE=1 SV=2	8	23	23	23	18	10	21	16	21	21	18	10	21	16	21	21	18	10	21	16	21	21	47.8	47.8	47.8	61.054	573	573;234;221;158;175;83;94;58	0	By MS/MS	By MS/MS	By MS/MS	By MS/MS	By MS/MS	By MS/MS	44.7	22.9	46.2	37	46.2	44.9	363790000	42446000	4319600
sp|P10909-4|CLUS_HUMAN;sp|P10909|CLUS_HUMAN;sp|P10909-5|CLUS_HUMAN;sp|P10909-2|CLUS_HUMAN;tr|H0YLK8|H0YLK8_HUMAN;sp|P10909-3|CLUS_HUMAN;tr|H0YC35|H0YC35_HUMAN;tr|E7ERK6|E7ERK6_HUMAN;tr|E7ETB4|E7ETB4_HUMAN;tr|E5RG36|E5RG36_HUMAN;tr|E5RGB0|E5RGB0_HUMAN;tr|E5RH61|E5RH61_HUMAN;tr|E5RJZ5|E5RJZ5_HUMAN;tr|H0YAS8|H0YAS8_HUMAN	sp|P10909-4|CLUS_HUMAN;sp|P10909|CLUS_HUMAN;sp|P10909-5|CLUS_HUMAN;sp|P10909-2|CLUS_HUMAN;tr|H0YLK8|H0YLK8_HUMAN;sp|P10909-3|CLUS_HUMAN;tr|H0YC35|H0YC35_HUMAN;tr|E7ERK6|E7ERK6_HUMAN	21;21;21;21;13;12;12;11;9;7;7;7;7;6	21;21;21;21;13;12;12;11;9;7;7;7;7;6	21;21;21;21;13;12;12;11;9;7;7;7;7;6	>sp|P10909-4|CLUS_HUMAN Isoform 4 of Clusterin OS=Homo sapiens OX=9606 GN=CLU;>sp|P10909|CLUS_HUMAN Clusterin OS=Homo sapiens OX=9606 GN=CLU PE=1 SV=1;>sp|P10909-5|CLUS_HUMAN Isoform 5 of Clusterin OS=Homo sapiens OX=9606 GN=CLU;>sp|P10909-2|CLUS_HUMAN Iso	14	21	21	21	16	17	20	20	20	20	16	17	20	20	20	20	16	17	20	20	20	20	44.5	44.5	44.5	48.803	416	416;449;460;501;297;274;284;204;271;82;129;135;139;140	0	By MS/MS	By MS/MS	By MS/MS	By MS/MS	By MS/MS	By MS/MS	35.1	36.8	42.1	42.1	40.4	42.3	1971000000	88959000	86837000
sp|P11021|BIP_HUMAN	sp|P11021|BIP_HUMAN	18	18	18	>sp|P11021|BIP_HUMAN Endoplasmic reticulum chaperone BiP OS=Homo sapiens OX=9606 GN=HSPA5 PE=1 SV=2	1	18	18	18	18	13	15	14	15	15	18	13	15	14	15	15	18	13	15	14	15	15	37.2	37.2	37.2	72.332	654	654	0	By MS/MS	By MS/MS	By MS/MS	By MS/MS	By MS/MS	By MS/MS	37.2	28.6	32.3	32	32.3	32.3	302390000	90423000	11846000
sp|P11047|LAMC1_HUMAN	sp|P11047|LAMC1_HUMAN	5	5	5	>sp|P11047|LAMC1_HUMAN Laminin subunit gamma-1 OS=Homo sapiens OX=9606 GN=LAMC1 PE=1 SV=3	1	5	5	5	4	4	5	3	3	3	4	4	5	3	3	3	4	4	5	3	3	3	4.8	4.8	4.8	177.6	1609	1609	0	By MS/MS	By MS/MS	By MS/MS	By matching	By matching	By MS/MS	4	3.9	4.8	2.9	2.9	2.9	23198000	3008900	2991300
sp|P11142|HSP7C_HUMAN;sp|P11142-2|HSP7C_HUMAN;tr|E9PKE3|E9PKE3_HUMAN;tr|E9PN89|E9PN89_HUMAN;tr|E9PNE6|E9PNE6_HUMAN;tr|E9PQQ4|E9PQQ4_HUMAN;tr|E9PQK7|E9PQK7_HUMAN;tr|E9PK54|E9PK54_HUMAN;tr|E9PLF4|E9PLF4_HUMAN;tr|E9PPY6|E9PPY6_HUMAN;tr|A8K7Q2|A8K7Q2_HUMAN;tr|E9PN25|E9PN25_HUMAN;sp|P54652|HSP72_HUMAN;tr|E9PI65|E9PI65_HUMAN;tr|E9PM13|E9PM13_HUMAN;tr|E9PS65|E9PS65_HUMAN	sp|P11142|HSP7C_HUMAN;sp|P11142-2|HSP7C_HUMAN;tr|E9PKE3|E9PKE3_HUMAN;tr|E9PN89|E9PN89_HUMAN;tr|E9PNE6|E9PNE6_HUMAN;tr|E9PQQ4|E9PQQ4_HUMAN;tr|E9PQK7|E9PQK7_HUMAN;tr|E9PK54|E9PK54_HUMAN;tr|E9PLF4|E9PLF4_HUMAN	22;21;21;17;13;11;11;11;11;9;9;8;8;7;1;1	22;21;21;17;13;11;11;11;11;9;9;8;8;7;1;1	19;18;18;15;10;10;10;10;10;8;7;7;5;6;1;1	>sp|P11142|HSP7C_HUMAN Heat shock cognate 71 kDa protein OS=Homo sapiens OX=9606 GN=HSPA8 PE=1 SV=1;>sp|P11142-2|HSP7C_HUMAN Isoform 2 of Heat shock cognate 71 kDa protein OS=Homo sapiens OX=9606 GN=HSPA8;>tr|E9PKE3|E9PKE3_HUMAN Heat shock cognate 71 kDa p	16	22	22	19	21	13	15	12	21	18	21	13	15	12	21	18	18	11	14	11	18	15	37	37	33	70.897	646	646;493;627;312;500;171;178;183;187;137;410;132;639;168;150;223	0	By MS/MS	By MS/MS	By MS/MS	By MS/MS	By MS/MS	By MS/MS	33.6	26.6	30.5	24.9	36.5	31.9	271450000	99026000	9384600
sp|P12004|PCNA_HUMAN	sp|P12004|PCNA_HUMAN	1	1	1	>sp|P12004|PCNA_HUMAN Proliferating cell nuclear antigen OS=Homo sapiens OX=9606 GN=PCNA PE=1 SV=1	1	1	1	1	0	0	1	1	1	1	0	0	1	1	1	1	0	0	1	1	1	1	5	5	5	28.768	261	261	0.0037175	By matching	By matching	By matching	By matching	By MS/MS	By matching	0	0	5	5	5	5	6018900	0	0
sp|P12259|FA5_HUMAN;tr|A0A0A0MRJ7|A0A0A0MRJ7_HUMAN	sp|P12259|FA5_HUMAN;tr|A0A0A0MRJ7|A0A0A0MRJ7_HUMAN	4;4	4;4	4;4	>sp|P12259|FA5_HUMAN Coagulation factor V OS=Homo sapiens OX=9606 GN=F5 PE=1 SV=4;>tr|A0A0A0MRJ7|A0A0A0MRJ7_HUMAN Coagulation factor V OS=Homo sapiens OX=9606 GN=F5 PE=1 SV=1	2	4	4	4	1	3	3	2	2	2	1	3	3	2	2	2	1	3	3	2	2	2	2.1	2.1	2.1	251.7	2224	2224;2229	0	By matching	By MS/MS	By matching	By MS/MS	By matching	By MS/MS	0.4	1.6	1.5	1	1	0.9	9692500	223680	1048600
sp|P12814-2|ACTN1_HUMAN;sp|P12814|ACTN1_HUMAN;sp|P12814-3|ACTN1_HUMAN;sp|P12814-4|ACTN1_HUMAN;tr|H9KV75|H9KV75_HUMAN;tr|G3V2W4|G3V2W4_HUMAN;tr|G3V2N5|G3V2N5_HUMAN;tr|G3V2X9|G3V2X9_HUMAN	sp|P12814-2|ACTN1_HUMAN;sp|P12814|ACTN1_HUMAN;sp|P12814-3|ACTN1_HUMAN;sp|P12814-4|ACTN1_HUMAN;tr|H9KV75|H9KV75_HUMAN;tr|G3V2W4|G3V2W4_HUMAN	10;10;10;10;9;5;4;3	2;2;2;2;2;2;2;2	2;2;2;2;2;2;2;2	>sp|P12814-2|ACTN1_HUMAN Isoform 2 of Alpha-actinin-1 OS=Homo sapiens OX=9606 GN=ACTN1;>sp|P12814|ACTN1_HUMAN Alpha-actinin-1 OS=Homo sapiens OX=9606 GN=ACTN1 PE=1 SV=2;>sp|P12814-3|ACTN1_HUMAN Isoform 3 of Alpha-actinin-1 OS=Homo sapiens OX=9606 GN=ACTN1;	8	10	2	2	10	5	9	6	9	8	2	0	2	0	1	2	2	0	2	0	1	2	13.5	2.5	2.5	102.71	887	887;892;914;930;822;238;260;144	0	By MS/MS	By matching	By matching	By matching	By MS/MS	By matching	13.5	6.2	12.4	7.9	12.2	10.4	7441300	1184100	0
tr|J3QKP1|J3QKP1_HUMAN;tr|H3BNC6|H3BNC6_HUMAN;tr|A0A087WX17|A0A087WX17_HUMAN;tr|A0A087WU43|A0A087WU43_HUMAN;sp|P12830-2|CADH1_HUMAN;sp|P12830|CADH1_HUMAN;tr|A0A087WXI5|A0A087WXI5_HUMAN	tr|J3QKP1|J3QKP1_HUMAN;tr|H3BNC6|H3BNC6_HUMAN;tr|A0A087WX17|A0A087WX17_HUMAN;tr|A0A087WU43|A0A087WU43_HUMAN;sp|P12830-2|CADH1_HUMAN;sp|P12830|CADH1_HUMAN;tr|A0A087WXI5|A0A087WXI5_HUMAN	1;1;1;1;1;1;1	1;1;1;1;1;1;1	1;1;1;1;1;1;1	>tr|J3QKP1|J3QKP1_HUMAN Cadherin-1 (Fragment) OS=Homo sapiens OX=9606 GN=CDH1 PE=1 SV=1;>tr|H3BNC6|H3BNC6_HUMAN Cadherin-1 OS=Homo sapiens OX=9606 GN=CDH1 PE=1 SV=1;>tr|A0A087WX17|A0A087WX17_HUMAN Cadherin-1 OS=Homo sapiens OX=9606 GN=CDH1 PE=1 SV=1;>tr|A0	7	1	1	1	0	1	0	1	0	1	0	1	0	1	0	1	0	1	0	1	0	1	14.2	14.2	14.2	17.494	155	155;537;647;647;821;882;903	0.0098684	By matching	By MS/MS	By matching	By matching	By matching	By MS/MS	0	14.2	0	14.2	0	14.2	1033700	0	356250
tr|B1AHC9|B1AHC9_HUMAN;sp|P12956|XRCC6_HUMAN;sp|P12956-2|XRCC6_HUMAN	tr|B1AHC9|B1AHC9_HUMAN;sp|P12956|XRCC6_HUMAN;sp|P12956-2|XRCC6_HUMAN	8;8;7	8;8;7	8;8;7	>tr|B1AHC9|B1AHC9_HUMAN X-ray repair cross-complementing protein 6 OS=Homo sapiens OX=9606 GN=XRCC6 PE=1 SV=1;>sp|P12956|XRCC6_HUMAN X-ray repair cross-complementing protein 6 OS=Homo sapiens OX=9606 GN=XRCC6 PE=1 SV=2;>sp|P12956-2|XRCC6_HUMAN Isoform 2 of	3	8	8	8	8	5	8	5	7	7	8	5	8	5	7	7	8	5	8	5	7	7	19.1	19.1	19.1	64.283	559	559;609;568	0	By MS/MS	By matching	By MS/MS	By MS/MS	By MS/MS	By MS/MS	19.1	11.6	19.1	10.6	15.2	16.1	54065000	8819400	1334800
sp|P13010|XRCC5_HUMAN;tr|C9JZ81|C9JZ81_HUMAN	sp|P13010|XRCC5_HUMAN	3;1	3;1	3;1	>sp|P13010|XRCC5_HUMAN X-ray repair cross-complementing protein 5 OS=Homo sapiens OX=9606 GN=XRCC5 PE=1 SV=3	2	3	3	3	3	2	3	3	3	1	3	2	3	3	3	1	3	2	3	3	3	1	4.9	4.9	4.9	82.704	732	732;131	0	By MS/MS	By matching	By MS/MS	By matching	By MS/MS	By matching	4.9	3.7	4.9	4.9	4.9	1.2	15416000	3332800	193560
sp|P13611-4|CSPG2_HUMAN;tr|E9PF17|E9PF17_HUMAN;sp|P13611-3|CSPG2_HUMAN;sp|P13611-2|CSPG2_HUMAN;sp|P13611|CSPG2_HUMAN;sp|P13611-5|CSPG2_HUMAN;tr|Q86W61|Q86W61_HUMAN;tr|D6RGZ6|D6RGZ6_HUMAN	sp|P13611-4|CSPG2_HUMAN;tr|E9PF17|E9PF17_HUMAN;sp|P13611-3|CSPG2_HUMAN;sp|P13611-2|CSPG2_HUMAN;sp|P13611|CSPG2_HUMAN;sp|P13611-5|CSPG2_HUMAN	7;7;7;7;7;6;3;3	7;7;7;7;7;6;3;3	7;7;7;7;7;6;3;3	>sp|P13611-4|CSPG2_HUMAN Isoform V3 of Versican core protein OS=Homo sapiens OX=9606 GN=VCAN;>tr|E9PF17|E9PF17_HUMAN Versican core protein OS=Homo sapiens OX=9606 GN=VCAN PE=1 SV=2;>sp|P13611-3|CSPG2_HUMAN Isoform V2 of Versican core protein OS=Homo sapien	8	7	7	7	2	0	7	0	6	0	2	0	7	0	6	0	2	0	7	0	6	0	11.6	11.6	11.6	74.292	655	655;1594;1642;2409;3396;3370;354;1240	0	By matching	By matching	By MS/MS	By matching	By MS/MS	By matching	2.7	0	11.6	0	10.1	0	17526000	517920	0
sp|P13639|EF2_HUMAN	sp|P13639|EF2_HUMAN	11	11	11	>sp|P13639|EF2_HUMAN Elongation factor 2 OS=Homo sapiens OX=9606 GN=EEF2 PE=1 SV=4	1	11	11	11	11	6	11	10	10	9	11	6	11	10	10	9	11	6	11	10	10	9	18.1	18.1	18.1	95.337	858	858	0	By MS/MS	By matching	By MS/MS	By MS/MS	By MS/MS	By MS/MS	18.1	9.9	18.1	15.6	16.4	14.3	56525000	12035000	2381300
sp|P13667|PDIA4_HUMAN	sp|P13667|PDIA4_HUMAN	7	7	7	>sp|P13667|PDIA4_HUMAN Protein disulfide-isomerase A4 OS=Homo sapiens OX=9606 GN=PDIA4 PE=1 SV=2	1	7	7	7	7	2	5	5	4	6	7	2	5	5	4	6	7	2	5	5	4	6	10.5	10.5	10.5	72.932	645	645	0	By MS/MS	By matching	By MS/MS	By MS/MS	By MS/MS	By MS/MS	10.5	3.6	8.8	8.8	7	10.4	42254000	17773000	132250
sp|P13798|ACPH_HUMAN;tr|C9JIF9|C9JIF9_HUMAN;tr|F8WEH5|F8WEH5_HUMAN;tr|H7C393|H7C393_HUMAN	sp|P13798|ACPH_HUMAN;tr|C9JIF9|C9JIF9_HUMAN;tr|F8WEH5|F8WEH5_HUMAN;tr|H7C393|H7C393_HUMAN	2;2;1;1	2;2;1;1	2;2;1;1	>sp|P13798|ACPH_HUMAN Acylamino-acid-releasing enzyme OS=Homo sapiens OX=9606 GN=APEH PE=1 SV=4;>tr|C9JIF9|C9JIF9_HUMAN Acylamino-acid-releasing enzyme OS=Homo sapiens OX=9606 GN=APEH PE=1 SV=1;>tr|F8WEH5|F8WEH5_HUMAN Acylamino-acid-releasing enzyme OS=Hom	4	2	2	2	1	0	2	0	2	0	1	0	2	0	2	0	1	0	2	0	2	0	3.7	3.7	3.7	81.224	732	732;737;50;284	0	By MS/MS	By matching	By matching	By matching	By MS/MS	By matching	2	0	3.7	0	3.7	0	3913200	1283900	0
sp|P14174|MIF_HUMAN	sp|P14174|MIF_HUMAN	2	2	2	>sp|P14174|MIF_HUMAN Macrophage migration inhibitory factor OS=Homo sapiens OX=9606 GN=MIF PE=1 SV=4	1	2	2	2	2	1	2	2	0	2	2	1	2	2	0	2	2	1	2	2	0	2	17.4	17.4	17.4	12.476	115	115	0	By MS/MS	By matching	By MS/MS	By matching	By matching	By MS/MS	17.4	9.6	17.4	17.4	0	17.4	4611100	1008500	0
sp|P14314-2|GLU2B_HUMAN;sp|P14314|GLU2B_HUMAN;tr|K7ELL7|K7ELL7_HUMAN;tr|K7EKX1|K7EKX1_HUMAN;tr|K7EJ70|K7EJ70_HUMAN;tr|K7EPW7|K7EPW7_HUMAN;tr|A0A0C4DGP4|A0A0C4DGP4_HUMAN	sp|P14314-2|GLU2B_HUMAN;sp|P14314|GLU2B_HUMAN;tr|K7ELL7|K7ELL7_HUMAN	4;4;4;1;1;1;1	4;4;4;1;1;1;1	4;4;4;1;1;1;1	>sp|P14314-2|GLU2B_HUMAN Isoform 2 of Glucosidase 2 subunit beta OS=Homo sapiens OX=9606 GN=PRKCSH;>sp|P14314|GLU2B_HUMAN Glucosidase 2 subunit beta OS=Homo sapiens OX=9606 GN=PRKCSH PE=1 SV=2;>tr|K7ELL7|K7ELL7_HUMAN Glucosidase 2 subunit beta OS=Homo sapi	7	4	4	4	3	1	3	2	3	2	3	1	3	2	3	2	3	1	3	2	3	2	8.4	8.4	8.4	59.177	525	525;528;535;140;144;168;200	0	By MS/MS	By matching	By matching	By matching	By MS/MS	By MS/MS	5.9	2.1	6.5	4.6	6.5	4.6	4691000	0	0
sp|P14543-2|NID1_HUMAN;sp|P14543|NID1_HUMAN	sp|P14543-2|NID1_HUMAN;sp|P14543|NID1_HUMAN	4;4	4;4	4;4	>sp|P14543-2|NID1_HUMAN Isoform 2 of Nidogen-1 OS=Homo sapiens OX=9606 GN=NID1;>sp|P14543|NID1_HUMAN Nidogen-1 OS=Homo sapiens OX=9606 GN=NID1 PE=1 SV=3	2	4	4	4	2	2	3	1	3	3	2	2	3	1	3	3	2	2	3	1	3	3	6.4	6.4	6.4	122.02	1114	1114;1247	0	By matching	By MS/MS	By MS/MS	By matching	By MS/MS	By MS/MS	4	2.7	5.1	2.6	5.1	5.1	18589000	1966400	566220
sp|P14618|KPYM_HUMAN;tr|H3BTN5|H3BTN5_HUMAN;sp|P14618-2|KPYM_HUMAN;tr|B4DNK4|B4DNK4_HUMAN;sp|P14618-3|KPYM_HUMAN;tr|H3BQ34|H3BQ34_HUMAN;tr|H3BT25|H3BT25_HUMAN;tr|H3BUW1|H3BUW1_HUMAN;tr|H3BTJ2|H3BTJ2_HUMAN;tr|H3BR70|H3BR70_HUMAN;tr|H3BU13|H3BU13_HUMAN;tr|H3BN34|H3BN34_HUMAN;tr|H3BQZ3|H3BQZ3_HUMAN;sp|P30613-2|KPYR_HUMAN;sp|P30613|KPYR_HUMAN	sp|P14618|KPYM_HUMAN;tr|H3BTN5|H3BTN5_HUMAN;sp|P14618-2|KPYM_HUMAN;tr|B4DNK4|B4DNK4_HUMAN;sp|P14618-3|KPYM_HUMAN;tr|H3BQ34|H3BQ34_HUMAN	11;9;9;8;8;7;5;5;5;3;2;1;1;1;1	11;9;9;8;8;7;5;5;5;3;2;1;1;1;1	11;9;9;8;8;7;5;5;5;3;2;1;1;1;1	>sp|P14618|KPYM_HUMAN Pyruvate kinase PKM OS=Homo sapiens OX=9606 GN=PKM PE=1 SV=4;>tr|H3BTN5|H3BTN5_HUMAN Pyruvate kinase (Fragment) OS=Homo sapiens OX=9606 GN=PKM PE=1 SV=1;>sp|P14618-2|KPYM_HUMAN Isoform M1 of Pyruvate kinase PKM OS=Homo sapiens OX=9606	15	11	11	11	9	6	10	10	8	9	9	6	10	10	8	9	9	6	10	10	8	9	34.1	34.1	34.1	57.936	531	531;485;531;457;516;281;151;162;168;366;82;51;69;543;574	0	By MS/MS	By MS/MS	By MS/MS	By MS/MS	By MS/MS	By MS/MS	25.2	16.9	32	27.7	25.2	25.6	83359000	14079000	2445900
sp|P14625|ENPL_HUMAN;tr|Q96GW1|Q96GW1_HUMAN;tr|A0A1W2PRR1|A0A1W2PRR1_HUMAN;tr|F8W026|F8W026_HUMAN;tr|H0YIV0|H0YIV0_HUMAN	sp|P14625|ENPL_HUMAN	16;6;6;3;2	14;4;4;1;2	14;4;4;1;2	>sp|P14625|ENPL_HUMAN Endoplasmin OS=Homo sapiens OX=9606 GN=HSP90B1 PE=1 SV=1	5	16	14	14	14	9	12	13	15	15	12	7	10	12	13	13	12	7	10	12	13	13	26.9	25.2	25.2	92.468	803	803;315;315;48;147	0	By MS/MS	By matching	By MS/MS	By MS/MS	By MS/MS	By MS/MS	21.8	13.4	18.7	21.5	23.7	25.2	126370000	24908000	2318300
tr|F8VPF3|F8VPF3_HUMAN;tr|F8W1R7|F8W1R7_HUMAN;sp|P60660-2|MYL6_HUMAN;sp|P60660|MYL6_HUMAN;tr|J3KND3|J3KND3_HUMAN;tr|G8JLA2|G8JLA2_HUMAN;tr|G3V1V0|G3V1V0_HUMAN;tr|F8W1I5|F8W1I5_HUMAN;sp|P14649|MYL6B_HUMAN;tr|B7Z6Z4|B7Z6Z4_HUMAN	tr|F8VPF3|F8VPF3_HUMAN;tr|F8W1R7|F8W1R7_HUMAN;sp|P60660-2|MYL6_HUMAN;sp|P60660|MYL6_HUMAN;tr|J3KND3|J3KND3_HUMAN;tr|G8JLA2|G8JLA2_HUMAN;tr|G3V1V0|G3V1V0_HUMAN;tr|F8W1I5|F8W1I5_HUMAN;sp|P14649|MYL6B_HUMAN;tr|B7Z6Z4|B7Z6Z4_HUMAN	1;1;1;1;1;1;1;1;1;1	1;1;1;1;1;1;1;1;1;1	1;1;1;1;1;1;1;1;1;1	>tr|F8VPF3|F8VPF3_HUMAN Myosin light polypeptide 6 (Fragment) OS=Homo sapiens OX=9606 GN=MYL6 PE=1 SV=1;>tr|F8W1R7|F8W1R7_HUMAN Myosin light polypeptide 6 OS=Homo sapiens OX=9606 GN=MYL6 PE=1 SV=1;>sp|P60660-2|MYL6_HUMAN Isoform Smooth muscle of Myosin lig	10	1	1	1	1	0	0	0	1	1	1	0	0	0	1	1	1	0	0	0	1	1	10	10	10	14.436	130	130;145;151;151;152;152;161;175;208;238	0.0034843	By MS/MS	By matching	By matching	By matching	By matching	By matching	10	0	0	0	10	10	8369000	2571000	0
sp|P15144|AMPN_HUMAN	sp|P15144|AMPN_HUMAN	1	1	1	>sp|P15144|AMPN_HUMAN Aminopeptidase N OS=Homo sapiens OX=9606 GN=ANPEP PE=1 SV=4	1	1	1	1	1	0	0	0	1	1	1	0	0	0	1	1	1	0	0	0	1	1	1.3	1.3	1.3	109.54	967	967	1	By matching	By matching	By matching	By matching	By matching	By MS/MS	1.3	0	0	0	1.3	1.3	0	0	0
sp|P15151-3|PVR_HUMAN;sp|P15151-2|PVR_HUMAN;tr|A0A0A0MSA9|A0A0A0MSA9_HUMAN;sp|P15151-4|PVR_HUMAN;tr|A0A0C4DG49|A0A0C4DG49_HUMAN;sp|P15151|PVR_HUMAN	sp|P15151-3|PVR_HUMAN;sp|P15151-2|PVR_HUMAN;tr|A0A0A0MSA9|A0A0A0MSA9_HUMAN;sp|P15151-4|PVR_HUMAN;tr|A0A0C4DG49|A0A0C4DG49_HUMAN;sp|P15151|PVR_HUMAN	1;1;1;1;1;1	1;1;1;1;1;1	1;1;1;1;1;1	>sp|P15151-3|PVR_HUMAN Isoform Gamma of Poliovirus receptor OS=Homo sapiens OX=9606 GN=PVR;>sp|P15151-2|PVR_HUMAN Isoform Beta of Poliovirus receptor OS=Homo sapiens OX=9606 GN=PVR;>tr|A0A0A0MSA9|A0A0A0MSA9_HUMAN Poliovirus receptor OS=Homo sapiens OX=9606	6	1	1	1	1	0	1	0	1	1	1	0	1	0	1	1	1	0	1	0	1	1	3.3	3.3	3.3	39.304	364	364;372;392;392;417;417	1	By MS/MS	By matching	By matching	By matching	By matching	By matching	3.3	0	3.3	0	3.3	3.3	0	0	0
sp|P15169|CBPN_HUMAN;CON__Q2KJ83	sp|P15169|CBPN_HUMAN	4;1	4;1	4;1	>sp|P15169|CBPN_HUMAN Carboxypeptidase N catalytic chain OS=Homo sapiens OX=9606 GN=CPN1 PE=1 SV=1	2	4	4	4	2	2	4	4	4	4	2	2	4	4	4	4	2	2	4	4	4	4	16.2	16.2	16.2	52.286	458	458;462	0	By matching	By matching	By matching	By MS/MS	By MS/MS	By MS/MS	6.8	6.8	16.2	16.2	16.2	16.2	27827000	1366100	1010100
sp|P16870-2|CBPE_HUMAN;sp|P16870|CBPE_HUMAN;tr|H0YAM0|H0YAM0_HUMAN;tr|D6RF88|D6RF88_HUMAN;tr|C9JE88|C9JE88_HUMAN;tr|D6R930|D6R930_HUMAN	sp|P16870-2|CBPE_HUMAN;sp|P16870|CBPE_HUMAN	11;11;3;2;2;2	11;11;3;2;2;2	11;11;3;2;2;2	>sp|P16870-2|CBPE_HUMAN Isoform 2 of Carboxypeptidase E OS=Homo sapiens OX=9606 GN=CPE;>sp|P16870|CBPE_HUMAN Carboxypeptidase E OS=Homo sapiens OX=9606 GN=CPE PE=1 SV=1	6	11	11	11	9	8	9	8	8	5	9	8	9	8	8	5	9	8	9	8	8	5	34.8	34.8	34.8	49.885	440	440;476;108;139;147;157	0	By MS/MS	By MS/MS	By MS/MS	By MS/MS	By MS/MS	By MS/MS	29.1	28	28.9	28.6	25	17.3	99744000	12345000	18043000
sp|P17066|HSP76_HUMAN;sp|P48741|HSP77_HUMAN	sp|P17066|HSP76_HUMAN;sp|P48741|HSP77_HUMAN	6;3	1;1	1;1	>sp|P17066|HSP76_HUMAN Heat shock 70 kDa protein 6 OS=Homo sapiens OX=9606 GN=HSPA6 PE=1 SV=2;>sp|P48741|HSP77_HUMAN Putative heat shock 70 kDa protein 7 OS=Homo sapiens OX=9606 GN=HSPA7 PE=5 SV=2	2	6	1	1	6	4	3	4	6	6	1	1	0	1	1	1	1	1	0	1	1	1	10.1	1.7	1.7	71.027	643	643;367	0	By MS/MS	By MS/MS	By matching	By MS/MS	By MS/MS	By MS/MS	10.1	7.6	6.4	8.1	10.1	10.1	62345000	20344000	2228700
sp|P17174|AATC_HUMAN;sp|P17174-2|AATC_HUMAN	sp|P17174|AATC_HUMAN;sp|P17174-2|AATC_HUMAN	6;4	6;4	6;4	>sp|P17174|AATC_HUMAN Aspartate aminotransferase, cytoplasmic OS=Homo sapiens OX=9606 GN=GOT1 PE=1 SV=3;>sp|P17174-2|AATC_HUMAN Isoform 2 of Aspartate aminotransferase, cytoplasmic OS=Homo sapiens OX=9606 GN=GOT1	2	6	6	6	6	0	4	1	5	3	6	0	4	1	5	3	6	0	4	1	5	3	23	23	23	46.247	413	413;392	0	By MS/MS	By matching	By matching	By matching	By MS/MS	By matching	23	0	15	5.1	21.1	14.5	18501000	8519900	0
tr|E9PKD5|E9PKD5_HUMAN;tr|E9PM69|E9PM69_HUMAN;tr|R4GNH3|R4GNH3_HUMAN;sp|P17980|PRS6A_HUMAN	tr|E9PKD5|E9PKD5_HUMAN;tr|E9PM69|E9PM69_HUMAN;tr|R4GNH3|R4GNH3_HUMAN;sp|P17980|PRS6A_HUMAN	1;1;1;1	1;1;1;1	1;1;1;1	>tr|E9PKD5|E9PKD5_HUMAN 26S proteasome regulatory subunit 6A (Fragment) OS=Homo sapiens OX=9606 GN=PSMC3 PE=1 SV=2;>tr|E9PM69|E9PM69_HUMAN 26S proteasome regulatory subunit 6A OS=Homo sapiens OX=9606 GN=PSMC3 PE=1 SV=1;>tr|R4GNH3|R4GNH3_HUMAN 26S proteasom	4	1	1	1	0	0	0	0	0	1	0	0	0	0	0	1	0	0	0	0	0	1	6.1	6.1	6.1	34.614	311	311;397;423;439	0.00369	By matching	By matching	By matching	By matching	By matching	By MS/MS	0	0	0	0	0	6.1	0	0	0
tr|F5H282|F5H282_HUMAN;tr|E7EQR6|E7EQR6_HUMAN;sp|P17987|TCPA_HUMAN	tr|F5H282|F5H282_HUMAN;tr|E7EQR6|E7EQR6_HUMAN;sp|P17987|TCPA_HUMAN	1;1;1	1;1;1	1;1;1	>tr|F5H282|F5H282_HUMAN T-complex protein 1 subunit alpha OS=Homo sapiens OX=9606 GN=TCP1 PE=1 SV=1;>tr|E7EQR6|E7EQR6_HUMAN T-complex protein 1 subunit alpha OS=Homo sapiens OX=9606 GN=TCP1 PE=1 SV=1;>sp|P17987|TCPA_HUMAN T-complex protein 1 subunit alpha	3	1	1	1	1	0	1	0	0	0	1	0	1	0	0	0	1	0	1	0	0	0	6.9	6.9	6.9	36.456	332	332;401;556	0.0034483	By MS/MS	By matching	By matching	By matching	By matching	By matching	6.9	0	6.9	0	0	0	841560	550320	0
sp|P18206-2|VINC_HUMAN;sp|P18206|VINC_HUMAN	sp|P18206-2|VINC_HUMAN;sp|P18206|VINC_HUMAN	1;1	1;1	1;1	>sp|P18206-2|VINC_HUMAN Isoform 1 of Vinculin OS=Homo sapiens OX=9606 GN=VCL;>sp|P18206|VINC_HUMAN Vinculin OS=Homo sapiens OX=9606 GN=VCL PE=1 SV=4	2	1	1	1	1	0	1	0	1	0	1	0	1	0	1	0	1	0	1	0	1	0	1.3	1.3	1.3	116.72	1066	1066;1134	1	By MS/MS	By matching	By matching	By matching	By matching	By matching	1.3	0	1.3	0	1.3	0	0	0	0
sp|P18669|PGAM1_HUMAN;sp|P15259|PGAM2_HUMAN;sp|Q8N0Y7|PGAM4_HUMAN	sp|P18669|PGAM1_HUMAN;sp|P15259|PGAM2_HUMAN;sp|Q8N0Y7|PGAM4_HUMAN	2;1;1	2;1;1	2;1;1	>sp|P18669|PGAM1_HUMAN Phosphoglycerate mutase 1 OS=Homo sapiens OX=9606 GN=PGAM1 PE=1 SV=2;>sp|P15259|PGAM2_HUMAN Phosphoglycerate mutase 2 OS=Homo sapiens OX=9606 GN=PGAM2 PE=1 SV=3;>sp|Q8N0Y7|PGAM4_HUMAN Probable phosphoglycerate mutase 4 OS=Homo sapien	3	2	2	2	2	2	2	2	2	2	2	2	2	2	2	2	2	2	2	2	2	2	9.8	9.8	9.8	28.804	254	254;253;254	0	By MS/MS	By matching	By MS/MS	By MS/MS	By MS/MS	By MS/MS	9.8	9.8	9.8	9.8	9.8	9.8	23077000	7049800	938940
tr|E9PHH3|E9PHH3_HUMAN;tr|H7C1K4|H7C1K4_HUMAN;sp|P18827|SDC1_HUMAN	tr|E9PHH3|E9PHH3_HUMAN;tr|H7C1K4|H7C1K4_HUMAN;sp|P18827|SDC1_HUMAN	1;1;1	1;1;1	1;1;1	>tr|E9PHH3|E9PHH3_HUMAN Syndecan-1 OS=Homo sapiens OX=9606 GN=SDC1 PE=1 SV=1;>tr|H7C1K4|H7C1K4_HUMAN Syndecan-1 (Fragment) OS=Homo sapiens OX=9606 GN=SDC1 PE=1 SV=1;>sp|P18827|SDC1_HUMAN Syndecan-1 OS=Homo sapiens OX=9606 GN=SDC1 PE=1 SV=3	3	1	1	1	0	1	1	1	0	0	0	1	1	1	0	0	0	1	1	1	0	0	10.1	10.1	10.1	17.782	169	169;215;310	0.0035842	By matching	By MS/MS	By matching	By matching	By matching	By matching	0	10.1	10.1	10.1	0	0	3160300	0	2268900
sp|P19022-2|CADH2_HUMAN;sp|P19022|CADH2_HUMAN	sp|P19022-2|CADH2_HUMAN;sp|P19022|CADH2_HUMAN	3;3	3;3	3;3	>sp|P19022-2|CADH2_HUMAN Isoform 2 of Cadherin-2 OS=Homo sapiens OX=9606 GN=CDH2;>sp|P19022|CADH2_HUMAN Cadherin-2 OS=Homo sapiens OX=9606 GN=CDH2 PE=1 SV=4	2	3	3	3	3	3	3	3	2	2	3	3	3	3	2	2	3	3	3	3	2	2	5.8	5.8	5.8	97.039	875	875;906	0	By MS/MS	By matching	By MS/MS	By MS/MS	By MS/MS	By MS/MS	5.8	5.8	5.8	5.8	4.8	4.8	18177000	3556800	1533500
sp|P19338|NUCL_HUMAN;tr|H7BY16|H7BY16_HUMAN	sp|P19338|NUCL_HUMAN;tr|H7BY16|H7BY16_HUMAN	16;9	16;9	16;9	>sp|P19338|NUCL_HUMAN Nucleolin OS=Homo sapiens OX=9606 GN=NCL PE=1 SV=3;>tr|H7BY16|H7BY16_HUMAN Nucleolin (Fragment) OS=Homo sapiens OX=9606 GN=NCL PE=1 SV=8	2	16	16	16	6	0	9	9	13	16	6	0	9	9	13	16	6	0	9	9	13	16	27.6	27.6	27.6	76.613	710	710;296	0	By MS/MS	By matching	By MS/MS	By MS/MS	By MS/MS	By MS/MS	15.8	0	17	19.9	26.3	27.6	171870000	2647200	0
sp|P19652|A1AG2_HUMAN	sp|P19652|A1AG2_HUMAN	7	5	5	>sp|P19652|A1AG2_HUMAN Alpha-1-acid glycoprotein 2 OS=Homo sapiens OX=9606 GN=ORM2 PE=1 SV=2	1	7	5	5	5	7	5	6	5	5	4	5	4	5	4	4	4	5	4	5	4	4	34.3	25.9	25.9	23.602	201	201	0	By MS/MS	By MS/MS	By MS/MS	By MS/MS	By MS/MS	By MS/MS	16.9	34.3	16.9	30.3	16.9	16.9	112770000	9687500	35932000
sp|P19823|ITIH2_HUMAN;tr|Q5T985|Q5T985_HUMAN;tr|Q5T987|Q5T987_HUMAN	sp|P19823|ITIH2_HUMAN;tr|Q5T985|Q5T985_HUMAN	46;45;14	46;45;14	36;35;11	>sp|P19823|ITIH2_HUMAN Inter-alpha-trypsin inhibitor heavy chain H2 OS=Homo sapiens OX=9606 GN=ITIH2 PE=1 SV=2;>tr|Q5T985|Q5T985_HUMAN Inter-alpha-trypsin inhibitor heavy chain H2 OS=Homo sapiens OX=9606 GN=ITIH2 PE=1 SV=1	3	46	46	36	43	37	42	43	42	45	43	37	42	43	42	45	33	28	32	34	32	35	58.5	58.5	48.7	106.46	946	946;935;237	0	By MS/MS	By MS/MS	By MS/MS	By MS/MS	By MS/MS	By MS/MS	53.4	51.9	56.9	58.4	55.6	58.5	7380800000	657340000	527840000
sp|P20142|PEPC_HUMAN;tr|A2A3L9|A2A3L9_HUMAN;tr|Q4VXA6|Q4VXA6_HUMAN;sp|P20142-2|PEPC_HUMAN	sp|P20142|PEPC_HUMAN;tr|A2A3L9|A2A3L9_HUMAN;tr|Q4VXA6|Q4VXA6_HUMAN;sp|P20142-2|PEPC_HUMAN	2;1;1;1	2;1;1;1	2;1;1;1	>sp|P20142|PEPC_HUMAN Gastricsin OS=Homo sapiens OX=9606 GN=PGC PE=1 SV=1;>tr|A2A3L9|A2A3L9_HUMAN Gastricsin (Fragment) OS=Homo sapiens OX=9606 GN=PGC PE=1 SV=1;>tr|Q4VXA6|Q4VXA6_HUMAN Gastricsin (Fragment) OS=Homo sapiens OX=9606 GN=PGC PE=1 SV=8;>sp|P201	4	2	2	2	2	2	1	2	0	0	2	2	1	2	0	0	2	2	1	2	0	0	5.2	5.2	5.2	42.425	388	388;86;139;315	0	By MS/MS	By MS/MS	By matching	By MS/MS	By matching	By matching	5.2	5.2	2.1	5.2	0	0	10330000	1503200	6963000
sp|P20618|PSB1_HUMAN	sp|P20618|PSB1_HUMAN	1	1	1	>sp|P20618|PSB1_HUMAN Proteasome subunit beta type-1 OS=Homo sapiens OX=9606 GN=PSMB1 PE=1 SV=2	1	1	1	1	1	0	0	1	1	1	1	0	0	1	1	1	1	0	0	1	1	1	8.3	8.3	8.3	26.489	241	241	0	By MS/MS	By matching	By matching	By matching	By MS/MS	By matching	8.3	0	0	8.3	8.3	8.3	0	0	0
tr|A0A0D9SFE5|A0A0D9SFE5_HUMAN;tr|E9PBF6|E9PBF6_HUMAN;sp|P20700|LMNB1_HUMAN	tr|A0A0D9SFE5|A0A0D9SFE5_HUMAN;tr|E9PBF6|E9PBF6_HUMAN;sp|P20700|LMNB1_HUMAN	2;2;2	2;2;2	2;2;2	>tr|A0A0D9SFE5|A0A0D9SFE5_HUMAN Lamin B1, isoform CRA_a OS=Homo sapiens OX=9606 GN=LMNB1 PE=1 SV=1;>tr|E9PBF6|E9PBF6_HUMAN Lamin-B1 OS=Homo sapiens OX=9606 GN=LMNB1 PE=1 SV=1;>sp|P20700|LMNB1_HUMAN Lamin-B1 OS=Homo sapiens OX=9606 GN=LMNB1 PE=1 SV=2	3	2	2	2	0	0	0	1	1	2	0	0	0	1	1	2	0	0	0	1	1	2	7.3	7.3	7.3	37.581	329	329;387;586	0.0038168	By matching	By matching	By matching	By matching	By matching	By MS/MS	0	0	0	3.3	3.3	7.3	3973400	0	0
tr|E9PBS1|E9PBS1_HUMAN;sp|P22234|PUR6_HUMAN;sp|P22234-2|PUR6_HUMAN;tr|D6RF62|D6RF62_HUMAN	tr|E9PBS1|E9PBS1_HUMAN;sp|P22234|PUR6_HUMAN;sp|P22234-2|PUR6_HUMAN;tr|D6RF62|D6RF62_HUMAN	4;4;3;2	4;4;3;2	4;4;3;2	>tr|E9PBS1|E9PBS1_HUMAN Multifunctional protein ADE2 (Fragment) OS=Homo sapiens OX=9606 GN=PAICS PE=1 SV=1;>sp|P22234|PUR6_HUMAN Multifunctional protein ADE2 OS=Homo sapiens OX=9606 GN=PAICS PE=1 SV=3;>sp|P22234-2|PUR6_HUMAN Isoform 2 of Multifunctional pr	4	4	4	4	2	1	3	1	2	4	2	1	3	1	2	4	2	1	3	1	2	4	14.8	14.8	14.8	45.651	413	413;425;432;333	0	By MS/MS	By matching	By matching	By matching	By MS/MS	By MS/MS	6.3	3.1	11.6	3.1	6.8	14.8	14292000	1384100	1438000
sp|P22314-2|UBA1_HUMAN;sp|P22314|UBA1_HUMAN;tr|Q5JRR6|Q5JRR6_HUMAN;tr|Q5JRS1|Q5JRS1_HUMAN;tr|Q5JRS3|Q5JRS3_HUMAN;tr|Q5JRS2|Q5JRS2_HUMAN;tr|Q5JRR9|Q5JRR9_HUMAN;tr|Q5JRS0|Q5JRS0_HUMAN	sp|P22314-2|UBA1_HUMAN;sp|P22314|UBA1_HUMAN	5;5;2;1;1;1;1;1	5;5;2;1;1;1;1;1	5;5;2;1;1;1;1;1	>sp|P22314-2|UBA1_HUMAN Isoform 2 of Ubiquitin-like modifier-activating enzyme 1 OS=Homo sapiens OX=9606 GN=UBA1;>sp|P22314|UBA1_HUMAN Ubiquitin-like modifier-activating enzyme 1 OS=Homo sapiens OX=9606 GN=UBA1 PE=1 SV=3	8	5	5	5	4	1	5	3	5	4	4	1	5	3	5	4	4	1	5	3	5	4	8.7	8.7	8.7	113.8	1018	1018;1058;506;173;195;234;270;284	0	By MS/MS	By matching	By MS/MS	By matching	By MS/MS	By MS/MS	6.2	1.2	8.7	4.4	8.7	6.2	19860000	3949100	295590
sp|P22392-2|NDKB_HUMAN;tr|Q32Q12|Q32Q12_HUMAN;sp|P22392|NDKB_HUMAN;sp|O60361|NDK8_HUMAN;tr|J3KPD9|J3KPD9_HUMAN;tr|E7ERL0|E7ERL0_HUMAN;sp|P15531|NDKA_HUMAN;sp|P15531-2|NDKA_HUMAN;tr|F6XY72|F6XY72_HUMAN;tr|C9K028|C9K028_HUMAN;tr|E5RHP0|E5RHP0_HUMAN	sp|P22392-2|NDKB_HUMAN;tr|Q32Q12|Q32Q12_HUMAN;sp|P22392|NDKB_HUMAN;sp|O60361|NDK8_HUMAN;tr|J3KPD9|J3KPD9_HUMAN;tr|E7ERL0|E7ERL0_HUMAN;sp|P15531|NDKA_HUMAN;sp|P15531-2|NDKA_HUMAN	8;8;7;5;5;4;4;4;2;1;1	8;8;7;5;5;4;4;4;2;1;1	8;8;7;5;5;4;4;4;2;1;1	>sp|P22392-2|NDKB_HUMAN Isoform 3 of Nucleoside diphosphate kinase B OS=Homo sapiens OX=9606 GN=NME2;>tr|Q32Q12|Q32Q12_HUMAN Nucleoside diphosphate kinase OS=Homo sapiens OX=9606 GN=NME1-NME2 PE=1 SV=1;>sp|P22392|NDKB_HUMAN Nucleoside diphosphate kinase B	11	8	8	8	8	5	8	6	6	6	8	5	8	6	6	6	8	5	8	6	6	6	57.3	57.3	57.3	30.137	267	267;292;152;137;197;139;152;177;82;60;82	0	By MS/MS	By MS/MS	By MS/MS	By MS/MS	By MS/MS	By MS/MS	57.3	39.7	57.3	46.4	46.4	46.4	119620000	25257000	4482300
sp|P22792|CPN2_HUMAN	sp|P22792|CPN2_HUMAN	6	6	6	>sp|P22792|CPN2_HUMAN Carboxypeptidase N subunit 2 OS=Homo sapiens OX=9606 GN=CPN2 PE=1 SV=3	1	6	6	6	3	5	5	4	4	4	3	5	5	4	4	4	3	5	5	4	4	4	18.7	18.7	18.7	60.556	545	545	0	By MS/MS	By MS/MS	By MS/MS	By MS/MS	By MS/MS	By MS/MS	8.6	14.7	15.4	12.7	12.7	12.7	40480000	2691300	6724000
sp|P23142-2|FBLN1_HUMAN;sp|P23142-3|FBLN1_HUMAN;sp|P23142-4|FBLN1_HUMAN;sp|P23142|FBLN1_HUMAN;tr|B1AHL2|B1AHL2_HUMAN;CON__ENSEMBL:ENSBTAP00000016046	sp|P23142-2|FBLN1_HUMAN;sp|P23142-3|FBLN1_HUMAN;sp|P23142-4|FBLN1_HUMAN;sp|P23142|FBLN1_HUMAN;tr|B1AHL2|B1AHL2_HUMAN	3;3;3;3;3;1	3;3;3;3;3;1	3;3;3;3;3;1	>sp|P23142-2|FBLN1_HUMAN Isoform A of Fibulin-1 OS=Homo sapiens OX=9606 GN=FBLN1;>sp|P23142-3|FBLN1_HUMAN Isoform B of Fibulin-1 OS=Homo sapiens OX=9606 GN=FBLN1;>sp|P23142-4|FBLN1_HUMAN Isoform C of Fibulin-1 OS=Homo sapiens OX=9606 GN=FBLN1;>sp|P23142|FB	6	3	3	3	2	1	3	2	3	3	2	1	3	2	3	3	2	1	3	2	3	3	5.3	5.3	5.3	61.552	566	566;601;683;703;721;706	0	By MS/MS	By matching	By MS/MS	By matching	By MS/MS	By MS/MS	3.5	1.8	5.3	3.5	5.3	5.3	11638000	1407000	709500
tr|E9PPU1|E9PPU1_HUMAN;tr|H0YEU2|H0YEU2_HUMAN;tr|E9PL09|E9PL09_HUMAN;sp|P23396|RS3_HUMAN;sp|P23396-2|RS3_HUMAN	tr|E9PPU1|E9PPU1_HUMAN;tr|H0YEU2|H0YEU2_HUMAN;tr|E9PL09|E9PL09_HUMAN;sp|P23396|RS3_HUMAN;sp|P23396-2|RS3_HUMAN	1;1;1;1;1	1;1;1;1;1	1;1;1;1;1	>tr|E9PPU1|E9PPU1_HUMAN 40S ribosomal protein S3 OS=Homo sapiens OX=9606 GN=RPS3 PE=1 SV=1;>tr|H0YEU2|H0YEU2_HUMAN 40S ribosomal protein S3 (Fragment) OS=Homo sapiens OX=9606 GN=RPS3 PE=1 SV=1;>tr|E9PL09|E9PL09_HUMAN 40S ribosomal protein S3 OS=Homo sapien	5	1	1	1	1	1	1	1	1	0	1	1	1	1	1	0	1	1	1	1	1	0	10.1	10.1	10.1	17.407	158	158;171;231;243;259	1	By MS/MS	By matching	By matching	By matching	By matching	By matching	10.1	10.1	10.1	10.1	10.1	0	0	0	0
sp|P23526|SAHH_HUMAN;sp|P23526-2|SAHH_HUMAN	sp|P23526|SAHH_HUMAN;sp|P23526-2|SAHH_HUMAN	9;7	9;7	9;7	>sp|P23526|SAHH_HUMAN Adenosylhomocysteinase OS=Homo sapiens OX=9606 GN=AHCY PE=1 SV=4;>sp|P23526-2|SAHH_HUMAN Isoform 2 of Adenosylhomocysteinase OS=Homo sapiens OX=9606 GN=AHCY	2	9	9	9	7	3	9	6	9	7	7	3	9	6	9	7	7	3	9	6	9	7	24.1	24.1	24.1	47.716	432	432;404	0	By MS/MS	By matching	By MS/MS	By matching	By MS/MS	By MS/MS	18.8	7.9	24.1	16.7	24.1	18.8	122590000	12274000	1185000
tr|G3V1A4|G3V1A4_HUMAN;sp|P23528|COF1_HUMAN;tr|E9PK25|E9PK25_HUMAN;tr|E9PLJ3|E9PLJ3_HUMAN;tr|E9PS23|E9PS23_HUMAN;tr|E9PQB7|E9PQB7_HUMAN;tr|E9PP50|E9PP50_HUMAN	tr|G3V1A4|G3V1A4_HUMAN;sp|P23528|COF1_HUMAN;tr|E9PK25|E9PK25_HUMAN;tr|E9PLJ3|E9PLJ3_HUMAN;tr|E9PS23|E9PS23_HUMAN;tr|E9PQB7|E9PQB7_HUMAN;tr|E9PP50|E9PP50_HUMAN	2;2;2;1;1;1;1	2;2;2;1;1;1;1	2;2;2;1;1;1;1	>tr|G3V1A4|G3V1A4_HUMAN Cofilin 1 (Non-muscle), isoform CRA_a OS=Homo sapiens OX=9606 GN=CFL1 PE=1 SV=1;>sp|P23528|COF1_HUMAN Cofilin-1 OS=Homo sapiens OX=9606 GN=CFL1 PE=1 SV=3;>tr|E9PK25|E9PK25_HUMAN Cofilin-1 OS=Homo sapiens OX=9606 GN=CFL1 PE=1 SV=1;>t	7	2	2	2	2	0	2	0	1	1	2	0	2	0	1	1	2	0	2	0	1	1	28.2	28.2	28.2	16.811	149	149;166;204;79;90;122;159	0	By MS/MS	By matching	By MS/MS	By matching	By matching	By matching	28.2	0	28.2	0	9.4	9.4	5965000	2630900	0
sp|P25311|ZA2G_HUMAN;tr|C9JEV0|C9JEV0_HUMAN;tr|H7BZJ8|H7BZJ8_HUMAN	sp|P25311|ZA2G_HUMAN;tr|C9JEV0|C9JEV0_HUMAN	13;9;1	13;9;1	13;9;1	>sp|P25311|ZA2G_HUMAN Zinc-alpha-2-glycoprotein OS=Homo sapiens OX=9606 GN=AZGP1 PE=1 SV=2;>tr|C9JEV0|C9JEV0_HUMAN Zinc-alpha-2-glycoprotein OS=Homo sapiens OX=9606 GN=AZGP1 PE=1 SV=1	3	13	13	13	12	10	12	13	12	12	12	10	12	13	12	12	12	10	12	13	12	12	48.7	48.7	48.7	34.258	298	298;227;85	0	By MS/MS	By MS/MS	By MS/MS	By MS/MS	By MS/MS	By MS/MS	48.7	44	48.7	48.7	48.7	48.7	171430000	24155000	21590000
tr|F5GX11|F5GX11_HUMAN;sp|P25786|PSA1_HUMAN;sp|P25786-2|PSA1_HUMAN;tr|B4DEV8|B4DEV8_HUMAN	tr|F5GX11|F5GX11_HUMAN;sp|P25786|PSA1_HUMAN;sp|P25786-2|PSA1_HUMAN;tr|B4DEV8|B4DEV8_HUMAN	2;2;2;1	2;2;2;1	2;2;2;1	>tr|F5GX11|F5GX11_HUMAN Proteasome endopeptidase complex OS=Homo sapiens OX=9606 GN=PSMA1 PE=1 SV=1;>sp|P25786|PSA1_HUMAN Proteasome subunit alpha type-1 OS=Homo sapiens OX=9606 GN=PSMA1 PE=1 SV=1;>sp|P25786-2|PSA1_HUMAN Isoform Long of Proteasome subunit	4	2	2	2	1	1	2	1	2	2	1	1	2	1	2	2	1	1	2	1	2	2	13.4	13.4	13.4	26.505	238	238;263;269;164	0	By MS/MS	By matching	By matching	By matching	By MS/MS	By MS/MS	5	5	13.4	5	13.4	13.4	8658100	1289100	372430
tr|A0A024RA52|A0A024RA52_HUMAN;sp|P25787|PSA2_HUMAN;tr|H7C402|H7C402_HUMAN;tr|H3BT36|H3BT36_HUMAN;tr|C9JCK5|C9JCK5_HUMAN	tr|A0A024RA52|A0A024RA52_HUMAN;sp|P25787|PSA2_HUMAN;tr|H7C402|H7C402_HUMAN;tr|H3BT36|H3BT36_HUMAN;tr|C9JCK5|C9JCK5_HUMAN	2;2;1;1;1	2;2;1;1;1	2;2;1;1;1	>tr|A0A024RA52|A0A024RA52_HUMAN Proteasome subunit alpha type OS=Homo sapiens OX=9606 GN=PSMA2 PE=1 SV=1;>sp|P25787|PSA2_HUMAN Proteasome subunit alpha type-2 OS=Homo sapiens OX=9606 GN=PSMA2 PE=1 SV=2;>tr|H7C402|H7C402_HUMAN Proteasome subunit alpha type-	5	2	2	2	2	1	1	1	2	1	2	1	1	1	2	1	2	1	1	1	2	1	18.4	18.4	18.4	25.898	234	234;234;36;48;164	0	By MS/MS	By matching	By MS/MS	By matching	By MS/MS	By MS/MS	18.4	9	9	9	18.4	9	9706600	2736500	153540
sp|P25788-2|PSA3_HUMAN;sp|P25788|PSA3_HUMAN	sp|P25788-2|PSA3_HUMAN;sp|P25788|PSA3_HUMAN	2;2	2;2	2;2	>sp|P25788-2|PSA3_HUMAN Isoform 2 of Proteasome subunit alpha type-3 OS=Homo sapiens OX=9606 GN=PSMA3;>sp|P25788|PSA3_HUMAN Proteasome subunit alpha type-3 OS=Homo sapiens OX=9606 GN=PSMA3 PE=1 SV=2	2	2	2	2	2	1	2	2	2	1	2	1	2	2	2	1	2	1	2	2	2	1	10.5	10.5	10.5	27.647	248	248;255	0	By MS/MS	By matching	By MS/MS	By MS/MS	By MS/MS	By MS/MS	10.5	4.8	10.5	10.5	10.5	4.8	15917000	3042500	487260
tr|H0YLS6|H0YLS6_HUMAN;tr|H0YLC2|H0YLC2_HUMAN;tr|H0YKT8|H0YKT8_HUMAN;tr|H0YMI6|H0YMI6_HUMAN;tr|H0YMA1|H0YMA1_HUMAN;tr|H0YMZ1|H0YMZ1_HUMAN;tr|H0YN18|H0YN18_HUMAN;tr|H0YL69|H0YL69_HUMAN;sp|P25789|PSA4_HUMAN	tr|H0YLS6|H0YLS6_HUMAN;tr|H0YLC2|H0YLC2_HUMAN;tr|H0YKT8|H0YKT8_HUMAN;tr|H0YMI6|H0YMI6_HUMAN;tr|H0YMA1|H0YMA1_HUMAN;tr|H0YMZ1|H0YMZ1_HUMAN;tr|H0YN18|H0YN18_HUMAN;tr|H0YL69|H0YL69_HUMAN;sp|P25789|PSA4_HUMAN	1;1;1;1;1;1;1;1;1	1;1;1;1;1;1;1;1;1	1;1;1;1;1;1;1;1;1	>tr|H0YLS6|H0YLS6_HUMAN Proteasome subunit alpha type OS=Homo sapiens OX=9606 GN=PSMA4 PE=1 SV=1;>tr|H0YLC2|H0YLC2_HUMAN Proteasome subunit alpha type OS=Homo sapiens OX=9606 GN=PSMA4 PE=1 SV=1;>tr|H0YKT8|H0YKT8_HUMAN Proteasome subunit beta type (Fragment	9	1	1	1	1	0	1	0	1	1	1	0	1	0	1	1	1	0	1	0	1	1	8	8	8	13.948	125	125;174;181;183;209;220;230;236;261	0.0034722	By MS/MS	By matching	By matching	By matching	By MS/MS	By matching	8	0	8	0	8	8	3137100	912280	0
sp|P26641|EF1G_HUMAN;sp|P26641-2|EF1G_HUMAN	sp|P26641|EF1G_HUMAN;sp|P26641-2|EF1G_HUMAN	4;4	4;4	4;4	>sp|P26641|EF1G_HUMAN Elongation factor 1-gamma OS=Homo sapiens OX=9606 GN=EEF1G PE=1 SV=3;>sp|P26641-2|EF1G_HUMAN Isoform 2 of Elongation factor 1-gamma OS=Homo sapiens OX=9606 GN=EEF1G	2	4	4	4	3	1	4	3	4	2	3	1	4	3	4	2	3	1	4	3	4	2	10.3	10.3	10.3	50.118	437	437;487	0	By MS/MS	By matching	By matching	By matching	By MS/MS	By matching	7.6	2.3	10.3	7.6	10.3	4.6	23582000	3834200	289900
tr|E9PG15|E9PG15_HUMAN;sp|P27348|1433T_HUMAN	tr|E9PG15|E9PG15_HUMAN;sp|P27348|1433T_HUMAN	2;2	1;1	1;1	>tr|E9PG15|E9PG15_HUMAN 14-3-3 protein theta (Fragment) OS=Homo sapiens OX=9606 GN=YWHAQ PE=1 SV=1;>sp|P27348|1433T_HUMAN 14-3-3 protein theta OS=Homo sapiens OX=9606 GN=YWHAQ PE=1 SV=1	2	2	1	1	1	1	2	2	1	1	1	0	1	1	1	1	1	0	1	1	1	1	14.8	9.4	9.4	17.048	149	149;245	0	By MS/MS	By matching	By MS/MS	By matching	By MS/MS	By MS/MS	9.4	5.4	14.8	14.8	9.4	9.4	8033700	2893200	0
sp|P27487|DPP4_HUMAN	sp|P27487|DPP4_HUMAN	1	1	1	>sp|P27487|DPP4_HUMAN Dipeptidyl peptidase 4 OS=Homo sapiens OX=9606 GN=DPP4 PE=1 SV=2	1	1	1	1	1	1	0	1	0	1	1	1	0	1	0	1	1	1	0	1	0	1	1.8	1.8	1.8	88.278	766	766	0.0035714	By matching	By MS/MS	By matching	By matching	By matching	By MS/MS	1.8	1.8	0	1.8	0	1.8	4102700	858510	650870
sp|P27797|CALR_HUMAN;tr|K7EJB9|K7EJB9_HUMAN;tr|K7EL50|K7EL50_HUMAN	sp|P27797|CALR_HUMAN;tr|K7EJB9|K7EJB9_HUMAN	9;5;2	9;5;2	9;5;2	>sp|P27797|CALR_HUMAN Calreticulin OS=Homo sapiens OX=9606 GN=CALR PE=1 SV=1;>tr|K7EJB9|K7EJB9_HUMAN Calreticulin (Fragment) OS=Homo sapiens OX=9606 GN=CALR PE=1 SV=1	3	9	9	9	9	5	5	5	5	7	9	5	5	5	5	7	9	5	5	5	5	7	37.6	37.6	37.6	48.141	417	417;247;163	0	By MS/MS	By MS/MS	By MS/MS	By MS/MS	By MS/MS	By MS/MS	37.6	20.4	23.3	18.5	18.5	28.8	105230000	35091000	4091000
sp|P28066|PSA5_HUMAN	sp|P28066|PSA5_HUMAN	2	2	2	>sp|P28066|PSA5_HUMAN Proteasome subunit alpha type-5 OS=Homo sapiens OX=9606 GN=PSMA5 PE=1 SV=3	1	2	2	2	2	2	2	2	2	2	2	2	2	2	2	2	2	2	2	2	2	2	10.4	10.4	10.4	26.411	241	241	0	By MS/MS	By matching	By MS/MS	By MS/MS	By MS/MS	By MS/MS	10.4	10.4	10.4	10.4	10.4	10.4	12835000	2821000	506440
sp|P28070|PSB4_HUMAN	sp|P28070|PSB4_HUMAN	4	4	4	>sp|P28070|PSB4_HUMAN Proteasome subunit beta type-4 OS=Homo sapiens OX=9606 GN=PSMB4 PE=1 SV=4	1	4	4	4	4	2	3	1	2	2	4	2	3	1	2	2	4	2	3	1	2	2	26.5	26.5	26.5	29.204	264	264	0	By MS/MS	By matching	By MS/MS	By matching	By MS/MS	By matching	26.5	14	23.1	5.7	14	14	4790800	4790800	0
sp|P28072|PSB6_HUMAN;tr|I3L3X7|I3L3X7_HUMAN;tr|A0A087X2I4|A0A087X2I4_HUMAN	sp|P28072|PSB6_HUMAN	3;1;1	3;1;1	3;1;1	>sp|P28072|PSB6_HUMAN Proteasome subunit beta type-6 OS=Homo sapiens OX=9606 GN=PSMB6 PE=1 SV=4	3	3	3	3	1	1	2	2	3	2	1	1	2	2	3	2	1	1	2	2	3	2	13.4	13.4	13.4	25.357	239	239;102;213	0	By MS/MS	By matching	By MS/MS	By matching	By MS/MS	By MS/MS	4.2	4.2	8.8	8.8	13.4	8.8	30420000	3576300	407460
sp|P28074-3|PSB5_HUMAN;sp|P28074|PSB5_HUMAN;tr|H0YJM8|H0YJM8_HUMAN;sp|P28074-2|PSB5_HUMAN	sp|P28074-3|PSB5_HUMAN;sp|P28074|PSB5_HUMAN;tr|H0YJM8|H0YJM8_HUMAN;sp|P28074-2|PSB5_HUMAN	2;2;1;1	2;2;1;1	2;2;1;1	>sp|P28074-3|PSB5_HUMAN Isoform 3 of Proteasome subunit beta type-5 OS=Homo sapiens OX=9606 GN=PSMB5;>sp|P28074|PSB5_HUMAN Proteasome subunit beta type-5 OS=Homo sapiens OX=9606 GN=PSMB5 PE=1 SV=3;>tr|H0YJM8|H0YJM8_HUMAN Proteasome subunit beta type-5 (Fra	4	2	2	2	2	0	1	1	2	2	2	0	1	1	2	2	2	0	1	1	2	2	15	15	15	17.782	160	160;263;118;203	0	By MS/MS	By matching	By MS/MS	By MS/MS	By MS/MS	By matching	15	0	8.8	8.8	15	15	7490000	1426500	0
tr|H0Y9Q1|H0Y9Q1_HUMAN;sp|P28838-2|AMPL_HUMAN;sp|P28838|AMPL_HUMAN	tr|H0Y9Q1|H0Y9Q1_HUMAN;sp|P28838-2|AMPL_HUMAN;sp|P28838|AMPL_HUMAN	1;1;1	1;1;1	1;1;1	>tr|H0Y9Q1|H0Y9Q1_HUMAN Cytosol aminopeptidase (Fragment) OS=Homo sapiens OX=9606 GN=LAP3 PE=1 SV=8;>sp|P28838-2|AMPL_HUMAN Isoform 2 of Cytosol aminopeptidase OS=Homo sapiens OX=9606 GN=LAP3;>sp|P28838|AMPL_HUMAN Cytosol aminopeptidase OS=Homo sapiens OX=	3	1	1	1	1	1	1	1	1	0	1	1	1	1	1	0	1	1	1	1	1	0	6.7	6.7	6.7	22.498	208	208;488;519	0.0036232	By MS/MS	By matching	By MS/MS	By matching	By matching	By matching	6.7	6.7	6.7	6.7	6.7	0	0	0	0
sp|P29401|TKT_HUMAN;sp|P29401-2|TKT_HUMAN;tr|A0A0B4J1R6|A0A0B4J1R6_HUMAN;tr|E9PFF2|E9PFF2_HUMAN;tr|F8W888|F8W888_HUMAN	sp|P29401|TKT_HUMAN;sp|P29401-2|TKT_HUMAN;tr|A0A0B4J1R6|A0A0B4J1R6_HUMAN	12;12;10;5;2	12;12;10;5;2	12;12;10;5;2	>sp|P29401|TKT_HUMAN Transketolase OS=Homo sapiens OX=9606 GN=TKT PE=1 SV=3;>sp|P29401-2|TKT_HUMAN Isoform 2 of Transketolase OS=Homo sapiens OX=9606 GN=TKT;>tr|A0A0B4J1R6|A0A0B4J1R6_HUMAN Transketolase OS=Homo sapiens OX=9606 GN=TKT PE=1 SV=1	5	12	12	12	10	6	10	8	8	11	10	6	10	8	8	11	10	6	10	8	8	11	33.5	33.5	33.5	67.877	623	623;631;457;334;153	0	By MS/MS	By matching	By MS/MS	By MS/MS	By MS/MS	By MS/MS	27.9	16.5	29.2	23	21.3	29.4	81156000	23481000	2151800
sp|P29622|KAIN_HUMAN	sp|P29622|KAIN_HUMAN	5	5	5	>sp|P29622|KAIN_HUMAN Kallistatin OS=Homo sapiens OX=9606 GN=SERPINA4 PE=1 SV=3	1	5	5	5	0	4	0	1	1	0	0	4	0	1	1	0	0	4	0	1	1	0	17.3	17.3	17.3	48.541	427	427	0	By matching	By MS/MS	By matching	By matching	By MS/MS	By matching	0	15.2	0	4.9	2.1	0	4186100	0	2558500
tr|E9PPR1|E9PPR1_HUMAN;tr|E9PL12|E9PL12_HUMAN;tr|E9PL71|E9PL71_HUMAN;tr|E9PQ49|E9PQ49_HUMAN;tr|E9PI39|E9PI39_HUMAN;sp|P29692-3|EF1D_HUMAN;tr|E9PK01|E9PK01_HUMAN;sp|P29692|EF1D_HUMAN;tr|A0A087X1X7|A0A087X1X7_HUMAN;sp|P29692-2|EF1D_HUMAN;tr|E9PRY8|E9PRY8_HUMAN;tr|E9PN91|E9PN91_HUMAN;tr|E9PMW7|E9PMW7_HUMAN;tr|E9PIZ1|E9PIZ1_HUMAN;tr|E9PK06|E9PK06_HUMAN;tr|H0YCK7|H0YCK7_HUMAN;tr|E9PQZ1|E9PQZ1_HUMAN;sp…	tr|E9PPR1|E9PPR1_HUMAN;tr|E9PL12|E9PL12_HUMAN;tr|E9PL71|E9PL71_HUMAN;tr|E9PQ49|E9PQ49_HUMAN;tr|E9PI39|E9PI39_HUMAN;sp|P29692-3|EF1D_HUMAN;tr|E9PK01|E9PK01_HUMAN;sp|P29692|EF1D_HUMAN;tr|A0A087X1X7|A0A087X1X7_HUMAN;sp|P29692-2|EF1D_HUMAN;tr|E9PRY8|E9PRY8_HUMAN;tr|E9PN91|E9PN91_HUMAN;tr|E9PMW7|E9PMW7_HUMAN;tr|E9PIZ1|E9PIZ1_HUMAN;tr|E9PK06|E9PK06_HUMAN;tr|H0YCK7|H0YCK7_HUMAN;tr|E9PQZ1|E9PQZ1_HUMAN;sp…	2;2;2;2;2;2;2;2;2;2;2;1;1;1;1;1;1;1	2;2;2;2;2;2;2;2;2;2;2;1;1;1;1;1;1;1	2;2;2;2;2;2;2;2;2;2;2;1;1;1;1;1;1;1	>tr|E9PPR1|E9PPR1_HUMAN Elongation factor 1-delta (Fragment) OS=Homo sapiens OX=9606 GN=EEF1D PE=1 SV=1;>tr|E9PL12|E9PL12_HUMAN Elongation factor 1-delta (Fragment) OS=Homo sapiens OX=9606 GN=EEF1D PE=1 SV=1;>tr|E9PL71|E9PL71_HUMAN Elongation factor 1-delt	18	2	2	2	1	0	1	1	2	1	1	0	1	1	2	1	1	0	1	1	2	1	15.1	15.1	15.1	18.157	166	166;168;187;198;204;257;261;281;631;647;697;106;130;137;139;210;238;262	0	By matching	By matching	By matching	By matching	By MS/MS	By MS/MS	7.8	0	7.8	7.8	15.1	7.8	0	0	0
sp|P30048-2|PRDX3_HUMAN;sp|P30048|PRDX3_HUMAN	sp|P30048-2|PRDX3_HUMAN;sp|P30048|PRDX3_HUMAN	2;2	2;2	2;2	>sp|P30048-2|PRDX3_HUMAN Isoform 2 of Thioredoxin-dependent peroxide reductase, mitochondrial OS=Homo sapiens OX=9606 GN=PRDX3;>sp|P30048|PRDX3_HUMAN Thioredoxin-dependent peroxide reductase, mitochondrial OS=Homo sapiens OX=9606 GN=PRDX3 PE=1 SV=3	2	2	2	2	2	0	2	0	2	1	2	0	2	0	2	1	2	0	2	0	2	1	10.5	10.5	10.5	25.838	238	238;256	0	By MS/MS	By matching	By matching	By matching	By matching	By matching	10.5	0	10.5	0	10.5	4.6	7290300	2898200	0
sp|P30050|RL12_HUMAN;sp|P30050-2|RL12_HUMAN	sp|P30050|RL12_HUMAN;sp|P30050-2|RL12_HUMAN	2;1	2;1	2;1	>sp|P30050|RL12_HUMAN 60S ribosomal protein L12 OS=Homo sapiens OX=9606 GN=RPL12 PE=1 SV=1;>sp|P30050-2|RL12_HUMAN Isoform 2 of 60S ribosomal protein L12 OS=Homo sapiens OX=9606 GN=RPL12	2	2	2	2	1	0	2	1	2	2	1	0	2	1	2	2	1	0	2	1	2	2	14.5	14.5	14.5	17.818	165	165;132	0	By MS/MS	By matching	By matching	By matching	By MS/MS	By MS/MS	5.5	0	14.5	5.5	14.5	14.5	18731000	1798100	0
sp|P30084|ECHM_HUMAN	sp|P30084|ECHM_HUMAN	1	1	1	>sp|P30084|ECHM_HUMAN Enoyl-CoA hydratase, mitochondrial OS=Homo sapiens OX=9606 GN=ECHS1 PE=1 SV=4	1	1	1	1	0	0	1	0	1	0	0	0	1	0	1	0	0	0	1	0	1	0	4.1	4.1	4.1	31.387	290	290	0.0035971	By matching	By matching	By matching	By matching	By MS/MS	By matching	0	0	4.1	0	4.1	0	0	0	0
sp|P30086|PEBP1_HUMAN	sp|P30086|PEBP1_HUMAN	2	2	2	>sp|P30086|PEBP1_HUMAN Phosphatidylethanolamine-binding protein 1 OS=Homo sapiens OX=9606 GN=PEBP1 PE=1 SV=3	1	2	2	2	2	1	0	2	0	0	2	1	0	2	0	0	2	1	0	2	0	0	18.2	18.2	18.2	21.057	187	187	0	By MS/MS	By matching	By matching	By matching	By matching	By matching	18.2	7.5	0	18.2	0	0	3801500	2736200	194080
sp|P30101|PDIA3_HUMAN	sp|P30101|PDIA3_HUMAN	11	11	8	>sp|P30101|PDIA3_HUMAN Protein disulfide-isomerase A3 OS=Homo sapiens OX=9606 GN=PDIA3 PE=1 SV=4	1	11	11	8	10	4	8	6	3	9	10	4	8	6	3	9	8	3	6	3	1	6	28.7	28.7	21.6	56.782	505	505	0	By MS/MS	By matching	By matching	By matching	By matching	By MS/MS	26.5	9.5	22	14.3	7.5	23.4	45440000	17040000	748380
sp|P31153|METK2_HUMAN;sp|P31153-2|METK2_HUMAN	sp|P31153|METK2_HUMAN;sp|P31153-2|METK2_HUMAN	2;1	2;1	2;1	>sp|P31153|METK2_HUMAN S-adenosylmethionine synthase isoform type-2 OS=Homo sapiens OX=9606 GN=MAT2A PE=1 SV=1;>sp|P31153-2|METK2_HUMAN Isoform 2 of S-adenosylmethionine synthase isoform type-2 OS=Homo sapiens OX=9606 GN=MAT2A	2	2	2	2	2	0	0	1	0	0	2	0	0	1	0	0	2	0	0	1	0	0	7.1	7.1	7.1	43.66	395	395;299	0	By MS/MS	By matching	By matching	By matching	By matching	By matching	7.1	0	0	3.3	0	0	0	0	0
sp|P31431-2|SDC4_HUMAN;sp|P31431|SDC4_HUMAN	sp|P31431-2|SDC4_HUMAN;sp|P31431|SDC4_HUMAN	2;2	2;2	2;2	>sp|P31431-2|SDC4_HUMAN Isoform 2 of Syndecan-4 OS=Homo sapiens OX=9606 GN=SDC4;>sp|P31431|SDC4_HUMAN Syndecan-4 OS=Homo sapiens OX=9606 GN=SDC4 PE=1 SV=2	2	2	2	2	1	2	2	1	2	1	1	2	2	1	2	1	1	2	2	1	2	1	15.7	15.7	15.7	16.545	153	153;198	0	By matching	By MS/MS	By MS/MS	By MS/MS	By MS/MS	By MS/MS	6.5	15.7	15.7	6.5	15.7	6.5	44141000	1681600	6924700
sp|P31939-2|PUR9_HUMAN;sp|P31939|PUR9_HUMAN;tr|C9JLK0|C9JLK0_HUMAN	sp|P31939-2|PUR9_HUMAN;sp|P31939|PUR9_HUMAN;tr|C9JLK0|C9JLK0_HUMAN	3;3;2	3;3;2	3;3;2	>sp|P31939-2|PUR9_HUMAN Isoform 2 of Bifunctional purine biosynthesis protein PURH OS=Homo sapiens OX=9606 GN=ATIC;>sp|P31939|PUR9_HUMAN Bifunctional purine biosynthesis protein PURH OS=Homo sapiens OX=9606 GN=ATIC PE=1 SV=3;>tr|C9JLK0|C9JLK0_HUMAN Bifunct	3	3	3	3	3	1	3	3	3	3	3	1	3	3	3	3	3	1	3	3	3	3	7.1	7.1	7.1	64.523	591	591;592;170	0	By MS/MS	By matching	By matching	By matching	By MS/MS	By matching	7.1	1.9	7.1	7.1	7.1	7.1	12449000	2706000	254250
tr|E5RGH4|E5RGH4_HUMAN;tr|E5RGV0|E5RGV0_HUMAN;tr|E7EN40|E7EN40_HUMAN;tr|D6RIU0|D6RIU0_HUMAN;tr|D6RBM0|D6RBM0_HUMAN;tr|H0YB39|H0YB39_HUMAN;tr|E9PCY7|E9PCY7_HUMAN;sp|P55795|HNRH2_HUMAN;sp|P31943|HNRH1_HUMAN;tr|G8JLB6|G8JLB6_HUMAN	tr|E5RGH4|E5RGH4_HUMAN;tr|E5RGV0|E5RGV0_HUMAN;tr|E7EN40|E7EN40_HUMAN;tr|D6RIU0|D6RIU0_HUMAN;tr|D6RBM0|D6RBM0_HUMAN;tr|H0YB39|H0YB39_HUMAN;tr|E9PCY7|E9PCY7_HUMAN;sp|P55795|HNRH2_HUMAN;sp|P31943|HNRH1_HUMAN;tr|G8JLB6|G8JLB6_HUMAN	1;1;1;1;1;1;1;1;1;1	1;1;1;1;1;1;1;1;1;1	1;1;1;1;1;1;1;1;1;1	>tr|E5RGH4|E5RGH4_HUMAN Heterogeneous nuclear ribonucleoprotein H (Fragment) OS=Homo sapiens OX=9606 GN=HNRNPH1 PE=1 SV=1;>tr|E5RGV0|E5RGV0_HUMAN Heterogeneous nuclear ribonucleoprotein H (Fragment) OS=Homo sapiens OX=9606 GN=HNRNPH1 PE=1 SV=1;>tr|E7EN40|E	10	1	1	1	1	0	0	0	0	1	1	0	0	0	0	1	1	0	0	0	0	1	17	17	17	11.181	100	100;155;166;168;212;277;429;449;449;472	0.0098039	By matching	By matching	By matching	By matching	By matching	By MS/MS	17	0	0	0	0	17	1843100	589240	0
tr|Q4VY20|Q4VY20_HUMAN;tr|Q4VY19|Q4VY19_HUMAN;tr|A0A0J9YWE8|A0A0J9YWE8_HUMAN;sp|P31946-2|1433B_HUMAN;sp|P31946|1433B_HUMAN;tr|A0A0J9YWZ2|A0A0J9YWZ2_HUMAN	tr|Q4VY20|Q4VY20_HUMAN;tr|Q4VY19|Q4VY19_HUMAN;tr|A0A0J9YWE8|A0A0J9YWE8_HUMAN;sp|P31946-2|1433B_HUMAN;sp|P31946|1433B_HUMAN;tr|A0A0J9YWZ2|A0A0J9YWZ2_HUMAN	3;3;3;3;3;2	2;2;2;2;2;1	1;1;1;1;1;1	>tr|Q4VY20|Q4VY20_HUMAN 14-3-3 protein beta/alpha (Fragment) OS=Homo sapiens OX=9606 GN=YWHAB PE=1 SV=1;>tr|Q4VY19|Q4VY19_HUMAN 14-3-3 protein beta/alpha (Fragment) OS=Homo sapiens OX=9606 GN=YWHAB PE=1 SV=1;>tr|A0A0J9YWE8|A0A0J9YWE8_HUMAN 14-3-3 protein b	6	3	2	1	1	3	3	3	2	2	1	2	2	2	2	2	1	1	1	1	1	1	51.4	40.5	18.9	8.4284	74	74;100;149;244;246;81	0	By MS/MS	By matching	By MS/MS	By MS/MS	By MS/MS	By MS/MS	18.9	51.4	51.4	51.4	40.5	40.5	13544000	3132100	240790
sp|P33908-2|MA1A1_HUMAN;sp|P33908|MA1A1_HUMAN	sp|P33908-2|MA1A1_HUMAN;sp|P33908|MA1A1_HUMAN	1;1	1;1	1;1	>sp|P33908-2|MA1A1_HUMAN Isoform 2 of Mannosyl-oligosaccharide 1,2-alpha-mannosidase IA OS=Homo sapiens OX=9606 GN=MAN1A1;>sp|P33908|MA1A1_HUMAN Mannosyl-oligosaccharide 1,2-alpha-mannosidase IA OS=Homo sapiens OX=9606 GN=MAN1A1 PE=1 SV=3	2	1	1	1	0	0	1	0	0	1	0	0	1	0	0	1	0	0	1	0	0	1	3.8	3.8	3.8	40.037	367	367;653	0.0035587	By matching	By matching	By MS/MS	By matching	By matching	By matching	0	0	3.8	0	0	3.8	2384800	0	0
tr|E5RJB8|E5RJB8_HUMAN;tr|E5RHU3|E5RHU3_HUMAN;tr|E7ESK6|E7ESK6_HUMAN;tr|E9PBI9|E9PBI9_HUMAN;sp|P34741|SDC2_HUMAN	tr|E5RJB8|E5RJB8_HUMAN;tr|E5RHU3|E5RHU3_HUMAN;tr|E7ESK6|E7ESK6_HUMAN;tr|E9PBI9|E9PBI9_HUMAN;sp|P34741|SDC2_HUMAN	1;1;1;1;1	1;1;1;1;1	1;1;1;1;1	>tr|E5RJB8|E5RJB8_HUMAN Syndecan-2 (Fragment) OS=Homo sapiens OX=9606 GN=SDC2 PE=1 SV=1;>tr|E5RHU3|E5RHU3_HUMAN Syndecan-2 (Fragment) OS=Homo sapiens OX=9606 GN=SDC2 PE=1 SV=2;>tr|E7ESK6|E7ESK6_HUMAN Syndecan OS=Homo sapiens OX=9606 GN=SDC2 PE=1 SV=1;>tr|E	5	1	1	1	1	1	1	1	0	1	1	1	1	1	0	1	1	1	1	1	0	1	10.9	10.9	10.9	14.905	137	137;145;165;172;201	0.0034247	By matching	By MS/MS	By MS/MS	By MS/MS	By matching	By matching	10.9	10.9	10.9	10.9	0	10.9	0	0	0
sp|P34932|HSP74_HUMAN;tr|A0A087WTS8|A0A087WTS8_HUMAN;tr|A0A087WYC1|A0A087WYC1_HUMAN;sp|P34932-2|HSP74_HUMAN	sp|P34932|HSP74_HUMAN;tr|A0A087WTS8|A0A087WTS8_HUMAN;tr|A0A087WYC1|A0A087WYC1_HUMAN	8;5;5;2	8;5;5;2	8;5;5;2	>sp|P34932|HSP74_HUMAN Heat shock 70 kDa protein 4 OS=Homo sapiens OX=9606 GN=HSPA4 PE=1 SV=4;>tr|A0A087WTS8|A0A087WTS8_HUMAN Heat shock 70 kDa protein 4 OS=Homo sapiens OX=9606 GN=HSPA4 PE=1 SV=1;>tr|A0A087WYC1|A0A087WYC1_HUMAN Heat shock 70 kDa protein 4	4	8	8	8	8	5	8	5	7	5	8	5	8	5	7	5	8	5	8	5	7	5	16.1	16.1	16.1	94.33	840	840;475;699;148	0	By MS/MS	By matching	By MS/MS	By matching	By MS/MS	By MS/MS	16.1	7.5	16.1	9.6	14.6	9.9	21649000	5086700	1151700
tr|A0A2R8Y804|A0A2R8Y804_HUMAN;tr|A0A2R8Y543|A0A2R8Y543_HUMAN;tr|A0A2R8Y5C3|A0A2R8Y5C3_HUMAN;tr|A0A2R8Y750|A0A2R8Y750_HUMAN;tr|A0A2R8Y5Z1|A0A2R8Y5Z1_HUMAN;tr|B4DGU4|B4DGU4_HUMAN;tr|A0A2R8YCH5|A0A2R8YCH5_HUMAN;tr|A0A2R8Y7Z0|A0A2R8Y7Z0_HUMAN;sp|P35222|CTNB1_HUMAN;tr|A0A2R8Y5A3|A0A2R8Y5A3_HUMAN	tr|A0A2R8Y804|A0A2R8Y804_HUMAN;tr|A0A2R8Y543|A0A2R8Y543_HUMAN;tr|A0A2R8Y5C3|A0A2R8Y5C3_HUMAN;tr|A0A2R8Y750|A0A2R8Y750_HUMAN;tr|A0A2R8Y5Z1|A0A2R8Y5Z1_HUMAN;tr|B4DGU4|B4DGU4_HUMAN;tr|A0A2R8YCH5|A0A2R8YCH5_HUMAN;tr|A0A2R8Y7Z0|A0A2R8Y7Z0_HUMAN;sp|P35222|CTNB1_HUMAN;tr|A0A2R8Y5A3|A0A2R8Y5A3_HUMAN	1;1;1;1;1;1;1;1;1;1	1;1;1;1;1;1;1;1;1;1	1;1;1;1;1;1;1;1;1;1	>tr|A0A2R8Y804|A0A2R8Y804_HUMAN Catenin beta-1 OS=Homo sapiens OX=9606 GN=CTNNB1 PE=4 SV=1;>tr|A0A2R8Y543|A0A2R8Y543_HUMAN Catenin beta-1 OS=Homo sapiens OX=9606 GN=CTNNB1 PE=4 SV=1;>tr|A0A2R8Y5C3|A0A2R8Y5C3_HUMAN Catenin beta-1 OS=Homo sapiens OX=9606 GN=	10	1	1	1	1	0	0	0	0	0	1	0	0	0	0	0	1	0	0	0	0	0	1.7	1.7	1.7	77.206	702	702;715;737;744;752;774;779;780;781;783	1	By MS/MS	By matching	By matching	By matching	By matching	By matching	1.7	0	0	0	0	0	0	0	0
sp|P35542|SAA4_HUMAN;tr|A0A096LPE2|A0A096LPE2_HUMAN	sp|P35542|SAA4_HUMAN;tr|A0A096LPE2|A0A096LPE2_HUMAN	3;3	3;3	3;3	>sp|P35542|SAA4_HUMAN Serum amyloid A-4 protein OS=Homo sapiens OX=9606 GN=SAA4 PE=1 SV=2;>tr|A0A096LPE2|A0A096LPE2_HUMAN SAA2-SAA4 readthrough OS=Homo sapiens OX=9606 GN=SAA2-SAA4 PE=4 SV=1	2	3	3	3	2	2	2	3	3	3	2	2	2	3	3	3	2	2	2	3	3	3	26.2	26.2	26.2	14.746	130	130;208	0	By matching	By matching	By MS/MS	By MS/MS	By MS/MS	By MS/MS	17.7	17.7	17.7	26.2	26.2	26.2	19924000	700130	896230
sp|P36955|PEDF_HUMAN;tr|I3L4N7|I3L4N7_HUMAN;tr|I3L107|I3L107_HUMAN;tr|I3L4F9|I3L4F9_HUMAN;tr|I3L4Z0|I3L4Z0_HUMAN;CON__Q95121;tr|I3L2R7|I3L2R7_HUMAN;tr|I3L425|I3L425_HUMAN;tr|I3L3Z3|I3L3Z3_HUMAN;tr|I3L1U4|I3L1U4_HUMAN	sp|P36955|PEDF_HUMAN	18;7;6;5;4;4;2;1;1;1	18;7;6;5;4;4;2;1;1;1	18;7;6;5;4;4;2;1;1;1	>sp|P36955|PEDF_HUMAN Pigment epithelium-derived factor OS=Homo sapiens OX=9606 GN=SERPINF1 PE=1 SV=4	10	18	18	18	18	17	16	17	16	13	18	17	16	17	16	13	18	17	16	17	16	13	51	51	51	46.312	418	418;138;99;90;128;416;132;87;111;114	0	By MS/MS	By MS/MS	By MS/MS	By MS/MS	By MS/MS	By MS/MS	51	50.2	48.6	41.4	41.4	36.1	691810000	110780000	136230000
sp|P37837|TALDO_HUMAN;tr|F2Z393|F2Z393_HUMAN	sp|P37837|TALDO_HUMAN;tr|F2Z393|F2Z393_HUMAN	2;1	2;1	2;1	>sp|P37837|TALDO_HUMAN Transaldolase OS=Homo sapiens OX=9606 GN=TALDO1 PE=1 SV=2;>tr|F2Z393|F2Z393_HUMAN Transaldolase OS=Homo sapiens OX=9606 GN=TALDO1 PE=1 SV=1	2	2	2	2	2	1	2	2	2	2	2	1	2	2	2	2	2	1	2	2	2	2	6.8	6.8	6.8	37.54	337	337;318	0	By MS/MS	By matching	By MS/MS	By matching	By matching	By matching	6.8	3.3	6.8	6.8	6.8	6.8	7756700	4023700	518130
sp|P38646|GRP75_HUMAN;tr|D6RA73|D6RA73_HUMAN;tr|D6RJI2|D6RJI2_HUMAN;tr|H0YBG6|H0YBG6_HUMAN	sp|P38646|GRP75_HUMAN;tr|D6RA73|D6RA73_HUMAN;tr|D6RJI2|D6RJI2_HUMAN;tr|H0YBG6|H0YBG6_HUMAN	2;1;1;1	2;1;1;1	2;1;1;1	>sp|P38646|GRP75_HUMAN Stress-70 protein, mitochondrial OS=Homo sapiens OX=9606 GN=HSPA9 PE=1 SV=2;>tr|D6RA73|D6RA73_HUMAN Stress-70 protein, mitochondrial (Fragment) OS=Homo sapiens OX=9606 GN=HSPA9 PE=1 SV=1;>tr|D6RJI2|D6RJI2_HUMAN Stress-70 protein, mit	4	2	2	2	1	0	2	0	2	2	1	0	2	0	2	2	1	0	2	0	2	2	3.8	3.8	3.8	73.68	679	679;62;95;163	0	By matching	By matching	By matching	By matching	By MS/MS	By MS/MS	2.1	0	3.8	0	3.8	3.8	7897300	478190	0
tr|H0YN26|H0YN26_HUMAN;sp|P39687|AN32A_HUMAN	tr|H0YN26|H0YN26_HUMAN;sp|P39687|AN32A_HUMAN	1;1	1;1	1;1	>tr|H0YN26|H0YN26_HUMAN Acidic leucine-rich nuclear phosphoprotein 32 family member A OS=Homo sapiens OX=9606 GN=ANP32A PE=1 SV=1;>sp|P39687|AN32A_HUMAN Acidic leucine-rich nuclear phosphoprotein 32 family member A OS=Homo sapiens OX=9606 GN=ANP32A PE=1 SV	2	1	1	1	0	0	0	0	0	1	0	0	0	0	0	1	0	0	0	0	0	1	11.9	11.9	11.9	19.997	177	177;249	0.0067797	By matching	By matching	By matching	By matching	By matching	By MS/MS	0	0	0	0	0	11.9	2131100	0	0
tr|B9A041|B9A041_HUMAN;sp|P40925-2|MDHC_HUMAN;sp|P40925|MDHC_HUMAN;sp|P40925-3|MDHC_HUMAN;tr|B8ZZ51|B8ZZ51_HUMAN;tr|C9JF79|C9JF79_HUMAN;tr|C9JRL4|C9JRL4_HUMAN	tr|B9A041|B9A041_HUMAN;sp|P40925-2|MDHC_HUMAN;sp|P40925|MDHC_HUMAN;sp|P40925-3|MDHC_HUMAN;tr|B8ZZ51|B8ZZ51_HUMAN;tr|C9JF79|C9JF79_HUMAN	4;4;4;4;3;2;1	4;4;4;4;3;2;1	4;4;4;4;3;2;1	>tr|B9A041|B9A041_HUMAN Malate dehydrogenase, cytoplasmic OS=Homo sapiens OX=9606 GN=MDH1 PE=1 SV=1;>sp|P40925-2|MDHC_HUMAN Isoform 2 of Malate dehydrogenase, cytoplasmic OS=Homo sapiens OX=9606 GN=MDH1;>sp|P40925|MDHC_HUMAN Malate dehydrogenase, cytoplasm	7	4	4	4	4	2	4	4	3	3	4	2	4	4	3	3	4	2	4	4	3	3	31	31	31	23.038	210	210;245;334;352;169;222;119	0	By MS/MS	By matching	By MS/MS	By matching	By matching	By MS/MS	31	15.2	31	31	23.3	21.4	37308000	8166900	965850
sp|P40926-2|MDHM_HUMAN;sp|P40926|MDHM_HUMAN;tr|G3XAL0|G3XAL0_HUMAN	sp|P40926-2|MDHM_HUMAN;sp|P40926|MDHM_HUMAN	3;3;1	3;3;1	3;3;1	>sp|P40926-2|MDHM_HUMAN Isoform 2 of Malate dehydrogenase, mitochondrial OS=Homo sapiens OX=9606 GN=MDH2;>sp|P40926|MDHM_HUMAN Malate dehydrogenase, mitochondrial OS=Homo sapiens OX=9606 GN=MDH2 PE=1 SV=3	3	3	3	3	3	0	3	3	3	3	3	0	3	3	3	3	3	0	3	3	3	3	19.3	19.3	19.3	30.875	296	296;338;231	0	By MS/MS	By matching	By MS/MS	By matching	By MS/MS	By MS/MS	19.3	0	19.3	19.3	19.3	19.3	7513100	2234500	0
sp|P43251-4|BTD_HUMAN;sp|P43251|BTD_HUMAN;sp|P43251-3|BTD_HUMAN;sp|P43251-2|BTD_HUMAN;tr|A0A2R8Y5J9|A0A2R8Y5J9_HUMAN;tr|F8WCU5|F8WCU5_HUMAN;tr|C9JSN9|C9JSN9_HUMAN	sp|P43251-4|BTD_HUMAN;sp|P43251|BTD_HUMAN;sp|P43251-3|BTD_HUMAN;sp|P43251-2|BTD_HUMAN;tr|A0A2R8Y5J9|A0A2R8Y5J9_HUMAN;tr|F8WCU5|F8WCU5_HUMAN;tr|C9JSN9|C9JSN9_HUMAN	2;2;2;2;1;1;1	2;2;2;2;1;1;1	2;2;2;2;1;1;1	>sp|P43251-4|BTD_HUMAN Isoform 4 of Biotinidase OS=Homo sapiens OX=9606 GN=BTD;>sp|P43251|BTD_HUMAN Biotinidase OS=Homo sapiens OX=9606 GN=BTD PE=1 SV=2;>sp|P43251-3|BTD_HUMAN Isoform 3 of Biotinidase OS=Homo sapiens OX=9606 GN=BTD;>sp|P43251-2|BTD_HUMAN I	7	2	2	2	2	2	2	1	2	2	2	2	2	1	2	2	2	2	2	1	2	2	5.7	5.7	5.7	58.913	523	523;543;545;545;159;179;251	0	By matching	By matching	By MS/MS	By matching	By MS/MS	By MS/MS	5.7	5.7	5.7	2.5	5.7	5.7	3706700	392560	382550
tr|M0QZN2|M0QZN2_HUMAN;tr|M0R0F0|M0R0F0_HUMAN;sp|P46782|RS5_HUMAN;tr|M0R0R2|M0R0R2_HUMAN	tr|M0QZN2|M0QZN2_HUMAN;tr|M0R0F0|M0R0F0_HUMAN;sp|P46782|RS5_HUMAN;tr|M0R0R2|M0R0R2_HUMAN	1;1;1;1	1;1;1;1	1;1;1;1	>tr|M0QZN2|M0QZN2_HUMAN 40S ribosomal protein S5 OS=Homo sapiens OX=9606 GN=RPS5 PE=1 SV=1;>tr|M0R0F0|M0R0F0_HUMAN 40S ribosomal protein S5 (Fragment) OS=Homo sapiens OX=9606 GN=RPS5 PE=1 SV=1;>sp|P46782|RS5_HUMAN 40S ribosomal protein S5 OS=Homo sapiens O	4	1	1	1	0	0	1	1	1	1	0	0	1	1	1	1	0	0	1	1	1	1	11.2	11.2	11.2	14.763	134	134;200;204;225	0.0035336	By matching	By matching	By matching	By matching	By MS/MS	By MS/MS	0	0	11.2	11.2	11.2	11.2	2492900	0	0
tr|C9JUG7|C9JUG7_HUMAN;sp|P47755-2|CAZA2_HUMAN;tr|F8W9N7|F8W9N7_HUMAN;tr|A0A0D9SET8|A0A0D9SET8_HUMAN;sp|P52907|CAZA1_HUMAN;sp|P47755|CAZA2_HUMAN	tr|C9JUG7|C9JUG7_HUMAN;sp|P47755-2|CAZA2_HUMAN;tr|F8W9N7|F8W9N7_HUMAN;tr|A0A0D9SET8|A0A0D9SET8_HUMAN;sp|P52907|CAZA1_HUMAN;sp|P47755|CAZA2_HUMAN	1;1;1;1;1;1	1;1;1;1;1;1	1;1;1;1;1;1	>tr|C9JUG7|C9JUG7_HUMAN F-actin-capping protein subunit alpha-2 OS=Homo sapiens OX=9606 GN=CAPZA2 PE=1 SV=1;>sp|P47755-2|CAZA2_HUMAN Isoform 2 of F-actin-capping protein subunit alpha-2 OS=Homo sapiens OX=9606 GN=CAPZA2;>tr|F8W9N7|F8W9N7_HUMAN F-actin-capp	6	1	1	1	1	1	1	1	1	1	1	1	1	1	1	1	1	1	1	1	1	1	6.8	6.8	6.8	16.698	146	146;172;174;174;286;286	0.0037037	By MS/MS	By matching	By MS/MS	By matching	By matching	By MS/MS	6.8	6.8	6.8	6.8	6.8	6.8	7632100	1707300	216610
sp|P49321-2|NASP_HUMAN;sp|P49321|NASP_HUMAN;sp|P49321-3|NASP_HUMAN;tr|Q5T624|Q5T624_HUMAN;sp|P49321-4|NASP_HUMAN;tr|H0YDS9|H0YDS9_HUMAN;tr|E9PI86|E9PI86_HUMAN;tr|E9PRH9|E9PRH9_HUMAN;tr|H0YF33|H0YF33_HUMAN;tr|E9PPQ8|E9PPQ8_HUMAN	sp|P49321-2|NASP_HUMAN;sp|P49321|NASP_HUMAN;sp|P49321-3|NASP_HUMAN;tr|Q5T624|Q5T624_HUMAN;sp|P49321-4|NASP_HUMAN;tr|H0YDS9|H0YDS9_HUMAN;tr|E9PI86|E9PI86_HUMAN;tr|E9PRH9|E9PRH9_HUMAN;tr|H0YF33|H0YF33_HUMAN	4;4;4;3;3;2;2;2;2;1	4;4;4;3;3;2;2;2;2;1	4;4;4;3;3;2;2;2;2;1	>sp|P49321-2|NASP_HUMAN Isoform 2 of Nuclear autoantigenic sperm protein OS=Homo sapiens OX=9606 GN=NASP;>sp|P49321|NASP_HUMAN Nuclear autoantigenic sperm protein OS=Homo sapiens OX=9606 GN=NASP PE=1 SV=2;>sp|P49321-3|NASP_HUMAN Isoform 3 of Nuclear autoan	10	4	4	4	4	0	3	2	3	4	4	0	3	2	3	4	4	0	3	2	3	4	15.8	15.8	15.8	48.804	449	449;788;790;422;724;175;256;268;288;154	0	By MS/MS	By matching	By matching	By matching	By MS/MS	By MS/MS	15.8	0	10	4.9	10	15.8	15434000	2347600	0
sp|P49327|FAS_HUMAN;tr|A0A0U1RQF0|A0A0U1RQF0_HUMAN;tr|A0A0U1RRG3|A0A0U1RRG3_HUMAN	sp|P49327|FAS_HUMAN;tr|A0A0U1RQF0|A0A0U1RQF0_HUMAN	44;43;2	44;43;2	44;43;2	>sp|P49327|FAS_HUMAN Fatty acid synthase OS=Homo sapiens OX=9606 GN=FASN PE=1 SV=3;>tr|A0A0U1RQF0|A0A0U1RQF0_HUMAN Fatty acid synthase OS=Homo sapiens OX=9606 GN=FASN PE=1 SV=1	3	44	44	44	33	9	35	34	42	34	33	9	35	34	42	34	33	9	35	34	42	34	29	29	29	273.42	2511	2511;2509;150	0	By MS/MS	By MS/MS	By MS/MS	By MS/MS	By MS/MS	By MS/MS	21.9	5.5	22.7	23.2	28.1	22.7	279360000	43704000	2278100
tr|B4DUR8|B4DUR8_HUMAN;sp|P49368-2|TCPG_HUMAN;sp|P49368|TCPG_HUMAN	tr|B4DUR8|B4DUR8_HUMAN;sp|P49368-2|TCPG_HUMAN;sp|P49368|TCPG_HUMAN	3;3;3	3;3;3	3;3;3	>tr|B4DUR8|B4DUR8_HUMAN T-complex protein 1 subunit gamma OS=Homo sapiens OX=9606 GN=CCT3 PE=1 SV=1;>sp|P49368-2|TCPG_HUMAN Isoform 2 of T-complex protein 1 subunit gamma OS=Homo sapiens OX=9606 GN=CCT3;>sp|P49368|TCPG_HUMAN T-complex protein 1 subunit gam	3	3	3	3	2	0	3	2	3	2	2	0	3	2	3	2	2	0	3	2	3	2	9.6	9.6	9.6	55.674	500	500;507;545	0	By MS/MS	By matching	By matching	By matching	By matching	By MS/MS	7.4	0	9.6	7.4	9.6	7.4	4997500	623290	0
sp|P49588|SYAC_HUMAN;sp|P49588-2|SYAC_HUMAN;tr|H3BPK7|H3BPK7_HUMAN	sp|P49588|SYAC_HUMAN;sp|P49588-2|SYAC_HUMAN	3;3;1	3;3;1	3;3;1	>sp|P49588|SYAC_HUMAN Alanine--tRNA ligase, cytoplasmic OS=Homo sapiens OX=9606 GN=AARS PE=1 SV=2;>sp|P49588-2|SYAC_HUMAN Isoform 2 of Alanine--tRNA ligase, cytoplasmic OS=Homo sapiens OX=9606 GN=AARS	3	3	3	3	1	0	1	0	3	2	1	0	1	0	3	2	1	0	1	0	3	2	4.4	4.4	4.4	106.81	968	968;992;280	0	By matching	By matching	By matching	By matching	By MS/MS	By matching	1.4	0	1.4	0	4.4	2.8	5112500	0	0
tr|A0A087WUL2|A0A087WUL2_HUMAN;sp|P49720|PSB3_HUMAN	tr|A0A087WUL2|A0A087WUL2_HUMAN;sp|P49720|PSB3_HUMAN	1;1	1;1	1;1	>tr|A0A087WUL2|A0A087WUL2_HUMAN Proteasome subunit beta type-3 (Fragment) OS=Homo sapiens OX=9606 GN=PSMB3 PE=1 SV=1;>sp|P49720|PSB3_HUMAN Proteasome subunit beta type-3 OS=Homo sapiens OX=9606 GN=PSMB3 PE=1 SV=2	2	1	1	1	1	0	1	1	0	0	1	0	1	1	0	0	1	0	1	1	0	0	11	11	11	16.161	145	145;205	0.0066225	By MS/MS	By matching	By matching	By matching	By matching	By matching	11	0	11	11	0	0	2037700	994630	0
tr|A0A182DWH7|A0A182DWH7_HUMAN;sp|P49908|SEPP1_HUMAN	tr|A0A182DWH7|A0A182DWH7_HUMAN;sp|P49908|SEPP1_HUMAN	1;1	1;1	1;1	>tr|A0A182DWH7|A0A182DWH7_HUMAN Selenoprotein P (Fragment) OS=Homo sapiens OX=9606 GN=SELENOP PE=1 SV=1;>sp|P49908|SEPP1_HUMAN Selenoprotein P OS=Homo sapiens OX=9606 GN=SELENOP PE=1 SV=3	2	1	1	1	1	1	1	1	1	1	1	1	1	1	1	1	1	1	1	1	1	1	4.2	4.2	4.2	35.116	310	310;381	0.0036364	By MS/MS	By matching	By matching	By matching	By matching	By matching	4.2	4.2	4.2	4.2	4.2	4.2	0	0	0
sp|P50395-2|GDIB_HUMAN;sp|P50395|GDIB_HUMAN;tr|Q5SX91|Q5SX91_HUMAN;tr|Q5SX87|Q5SX87_HUMAN	sp|P50395-2|GDIB_HUMAN;sp|P50395|GDIB_HUMAN	4;4;1;1	4;4;1;1	4;4;1;1	>sp|P50395-2|GDIB_HUMAN Isoform 2 of Rab GDP dissociation inhibitor beta OS=Homo sapiens OX=9606 GN=GDI2;>sp|P50395|GDIB_HUMAN Rab GDP dissociation inhibitor beta OS=Homo sapiens OX=9606 GN=GDI2 PE=1 SV=2	4	4	4	4	4	0	2	0	1	2	4	0	2	0	1	2	4	0	2	0	1	2	15	15	15	45.619	400	400;445;203;263	0	By MS/MS	By matching	By matching	By matching	By matching	By matching	15	0	8.8	0	3.2	9.2	3270200	2878900	0
tr|A0A087WXM8|A0A087WXM8_HUMAN;sp|P50895|BCAM_HUMAN	tr|A0A087WXM8|A0A087WXM8_HUMAN;sp|P50895|BCAM_HUMAN	1;1	1;1	1;1	>tr|A0A087WXM8|A0A087WXM8_HUMAN Basal cell adhesion molecule OS=Homo sapiens OX=9606 GN=BCAM PE=1 SV=1;>sp|P50895|BCAM_HUMAN Basal cell adhesion molecule OS=Homo sapiens OX=9606 GN=BCAM PE=1 SV=2	2	1	1	1	1	1	1	1	1	1	1	1	1	1	1	1	1	1	1	1	1	1	3.2	3.2	3.2	63.693	588	588;628	0.0034364	By MS/MS	By matching	By MS/MS	By matching	By matching	By matching	3.2	3.2	3.2	3.2	3.2	3.2	0	0	0
sp|P50990-3|TCPQ_HUMAN;sp|P50990-2|TCPQ_HUMAN;sp|P50990|TCPQ_HUMAN;tr|H7C4C8|H7C4C8_HUMAN	sp|P50990-3|TCPQ_HUMAN;sp|P50990-2|TCPQ_HUMAN;sp|P50990|TCPQ_HUMAN;tr|H7C4C8|H7C4C8_HUMAN	2;2;2;1	2;2;2;1	2;2;2;1	>sp|P50990-3|TCPQ_HUMAN Isoform 3 of T-complex protein 1 subunit theta OS=Homo sapiens OX=9606 GN=CCT8;>sp|P50990-2|TCPQ_HUMAN Isoform 2 of T-complex protein 1 subunit theta OS=Homo sapiens OX=9606 GN=CCT8;>sp|P50990|TCPQ_HUMAN T-complex protein 1 subunit	4	2	2	2	2	0	2	1	2	2	2	0	2	1	2	2	2	0	2	1	2	2	5.9	5.9	5.9	51.586	475	475;529;548;323	0	By MS/MS	By matching	By matching	By matching	By matching	By MS/MS	5.9	0	5.9	3.2	5.9	5.9	8317400	2103100	0
sp|P51508|ZNF81_HUMAN	sp|P51508|ZNF81_HUMAN	1	1	1	>sp|P51508|ZNF81_HUMAN Zinc finger protein 81 OS=Homo sapiens OX=9606 GN=ZNF81 PE=1 SV=3	1	1	1	1	1	1	1	1	1	0	1	1	1	1	1	0	1	1	1	1	1	0	1.1	1.1	1.1	75.959	661	661	1	By matching	By matching	By matching	By MS/MS	By matching	By matching	1.1	1.1	1.1	1.1	1.1	0	0	0	0
sp|P51654|GPC3_HUMAN;sp|P51654-3|GPC3_HUMAN;sp|P51654-2|GPC3_HUMAN;tr|H0Y3U6|H0Y3U6_HUMAN;REV__sp|Q96HE7|ERO1A_HUMAN	sp|P51654|GPC3_HUMAN;sp|P51654-3|GPC3_HUMAN;sp|P51654-2|GPC3_HUMAN;tr|H0Y3U6|H0Y3U6_HUMAN	12;12;10;8;1	12;12;10;8;1	12;12;10;8;1	>sp|P51654|GPC3_HUMAN Glypican-3 OS=Homo sapiens OX=9606 GN=GPC3 PE=1 SV=1;>sp|P51654-3|GPC3_HUMAN Isoform 3 of Glypican-3 OS=Homo sapiens OX=9606 GN=GPC3;>sp|P51654-2|GPC3_HUMAN Isoform 2 of Glypican-3 OS=Homo sapiens OX=9606 GN=GPC3;>tr|H0Y3U6|H0Y3U6_HUM	5	12	12	12	11	12	11	10	9	7	11	12	11	10	9	7	11	12	11	10	9	7	22.4	22.4	22.4	65.562	580	580;603;526;256;468	0	By MS/MS	By MS/MS	By MS/MS	By MS/MS	By MS/MS	By MS/MS	22.4	22.4	18.3	18.3	16.9	13.1	746180000	123480000	92330000
tr|K7EMN2|K7EMN2_HUMAN;tr|K7EM49|K7EM49_HUMAN;tr|K7EPF6|K7EPF6_HUMAN;sp|P52209-2|6PGD_HUMAN;sp|P52209|6PGD_HUMAN	tr|K7EMN2|K7EMN2_HUMAN;tr|K7EM49|K7EM49_HUMAN;tr|K7EPF6|K7EPF6_HUMAN;sp|P52209-2|6PGD_HUMAN;sp|P52209|6PGD_HUMAN	1;1;1;1;1	1;1;1;1;1	1;1;1;1;1	>tr|K7EMN2|K7EMN2_HUMAN 6-phosphogluconate dehydrogenase, decarboxylating (Fragment) OS=Homo sapiens OX=9606 GN=PGD PE=1 SV=1;>tr|K7EM49|K7EM49_HUMAN 6-phosphogluconate dehydrogenase, decarboxylating (Fragment) OS=Homo sapiens OX=9606 GN=PGD PE=1 SV=1;>tr|	5	1	1	1	1	0	1	1	1	1	1	0	1	1	1	1	1	0	1	1	1	1	10.6	10.6	10.6	17.293	160	160;205;256;470;483	0	By MS/MS	By matching	By matching	By matching	By MS/MS	By matching	10.6	0	10.6	10.6	10.6	10.6	7017800	1722500	0
tr|M0QZM1|M0QZM1_HUMAN;sp|P52272-2|HNRPM_HUMAN;tr|A0A087X0X3|A0A087X0X3_HUMAN;sp|P52272|HNRPM_HUMAN	tr|M0QZM1|M0QZM1_HUMAN;sp|P52272-2|HNRPM_HUMAN;tr|A0A087X0X3|A0A087X0X3_HUMAN;sp|P52272|HNRPM_HUMAN	1;1;1;1	1;1;1;1	1;1;1;1	>tr|M0QZM1|M0QZM1_HUMAN Heterogeneous nuclear ribonucleoprotein M (Fragment) OS=Homo sapiens OX=9606 GN=HNRNPM PE=1 SV=1;>sp|P52272-2|HNRPM_HUMAN Isoform 2 of Heterogeneous nuclear ribonucleoprotein M OS=Homo sapiens OX=9606 GN=HNRNPM;>tr|A0A087X0X3|A0A087	4	1	1	1	1	0	0	1	0	1	1	0	0	1	0	1	1	0	0	1	0	1	3.9	3.9	3.9	39.933	383	383;691;730;730	1	By matching	By matching	By matching	By matching	By matching	By MS/MS	3.9	0	0	3.9	0	3.9	0	0	0
sp|P53396-3|ACLY_HUMAN;sp|P53396-2|ACLY_HUMAN;sp|P53396|ACLY_HUMAN;tr|K7ESG8|K7ESG8_HUMAN	sp|P53396-3|ACLY_HUMAN;sp|P53396-2|ACLY_HUMAN;sp|P53396|ACLY_HUMAN	3;3;3;1	3;3;3;1	3;3;3;1	>sp|P53396-3|ACLY_HUMAN Isoform 3 of ATP-citrate synthase OS=Homo sapiens OX=9606 GN=ACLY;>sp|P53396-2|ACLY_HUMAN Isoform 2 of ATP-citrate synthase OS=Homo sapiens OX=9606 GN=ACLY;>sp|P53396|ACLY_HUMAN ATP-citrate synthase OS=Homo sapiens OX=9606 GN=ACLY P	4	3	3	3	3	0	3	0	3	2	3	0	3	0	3	2	3	0	3	0	3	2	5.1	5.1	5.1	91.098	830	830;1091;1101;109	0	By MS/MS	By matching	By matching	By matching	By matching	By MS/MS	5.1	0	5.1	0	5.1	3.4	1422800	477330	0
tr|H0YCY8|H0YCY8_HUMAN;sp|P53634|CATC_HUMAN	tr|H0YCY8|H0YCY8_HUMAN;sp|P53634|CATC_HUMAN	2;2	2;2	2;2	>tr|H0YCY8|H0YCY8_HUMAN Dipeptidyl peptidase 1 (Fragment) OS=Homo sapiens OX=9606 GN=CTSC PE=1 SV=8;>sp|P53634|CATC_HUMAN Dipeptidyl peptidase 1 OS=Homo sapiens OX=9606 GN=CTSC PE=1 SV=2	2	2	2	2	1	1	2	2	2	1	1	1	2	2	2	1	1	1	2	2	2	1	9.4	9.4	9.4	27.725	244	244;463	0	By MS/MS	By matching	By MS/MS	By matching	By MS/MS	By matching	4.9	4.9	9.4	9.4	9.4	4.9	38703000	3250100	1220700
sp|P55058|PLTP_HUMAN;sp|P55058-3|PLTP_HUMAN;sp|P55058-4|PLTP_HUMAN;sp|P55058-2|PLTP_HUMAN	sp|P55058|PLTP_HUMAN;sp|P55058-3|PLTP_HUMAN;sp|P55058-4|PLTP_HUMAN;sp|P55058-2|PLTP_HUMAN	2;1;1;1	2;1;1;1	2;1;1;1	>sp|P55058|PLTP_HUMAN Phospholipid transfer protein OS=Homo sapiens OX=9606 GN=PLTP PE=1 SV=1;>sp|P55058-3|PLTP_HUMAN Isoform 3 of Phospholipid transfer protein OS=Homo sapiens OX=9606 GN=PLTP;>sp|P55058-4|PLTP_HUMAN Isoform 4 of Phospholipid transfer prot	4	2	2	2	0	0	2	1	2	1	0	0	2	1	2	1	0	0	2	1	2	1	5.5	5.5	5.5	54.739	493	493;398;405;441	0	By matching	By matching	By MS/MS	By matching	By MS/MS	By matching	0	0	5.5	2.4	5.5	2.4	17826000	0	0
sp|P55060-4|XPO2_HUMAN;sp|P55060-3|XPO2_HUMAN;sp|P55060|XPO2_HUMAN	sp|P55060-4|XPO2_HUMAN;sp|P55060-3|XPO2_HUMAN;sp|P55060|XPO2_HUMAN	2;2;2	2;2;2	2;2;2	>sp|P55060-4|XPO2_HUMAN Isoform 4 of Exportin-2 OS=Homo sapiens OX=9606 GN=CSE1L;>sp|P55060-3|XPO2_HUMAN Isoform 3 of Exportin-2 OS=Homo sapiens OX=9606 GN=CSE1L;>sp|P55060|XPO2_HUMAN Exportin-2 OS=Homo sapiens OX=9606 GN=CSE1L PE=1 SV=3	3	2	2	2	1	0	1	1	1	1	1	0	1	1	1	1	1	0	1	1	1	1	2.3	2.3	2.3	103.88	915	915;945;971	0.0037453	By matching	By matching	By matching	By MS/MS	By MS/MS	By matching	1.4	0	1.4	0.9	1.4	1.4	1711300	0	0
sp|P56730|NETR_HUMAN	sp|P56730|NETR_HUMAN	1	1	1	>sp|P56730|NETR_HUMAN Neurotrypsin OS=Homo sapiens OX=9606 GN=PRSS12 PE=2 SV=2	1	1	1	1	0	0	1	1	1	1	0	0	1	1	1	1	0	0	1	1	1	1	0.9	0.9	0.9	97.066	875	875	1	By matching	By matching	By matching	By MS/MS	By matching	By matching	0	0	0.9	0.9	0.9	0.9	0	0	0
sp|P60174-1|TPIS_HUMAN;sp|P60174|TPIS_HUMAN;sp|P60174-4|TPIS_HUMAN;tr|U3KQF3|U3KQF3_HUMAN;tr|U3KPZ0|U3KPZ0_HUMAN;tr|U3KPS5|U3KPS5_HUMAN	sp|P60174-1|TPIS_HUMAN;sp|P60174|TPIS_HUMAN;sp|P60174-4|TPIS_HUMAN	12;12;8;4;4;2	12;12;8;4;4;2	12;12;8;4;4;2	>sp|P60174-1|TPIS_HUMAN Isoform 2 of Triosephosphate isomerase OS=Homo sapiens OX=9606 GN=TPI1;>sp|P60174|TPIS_HUMAN Triosephosphate isomerase OS=Homo sapiens OX=9606 GN=TPI1 PE=1 SV=3;>sp|P60174-4|TPIS_HUMAN Isoform 4 of Triosephosphate isomerase OS=Homo	6	12	12	12	10	7	12	8	8	10	10	7	12	8	8	10	10	7	12	8	8	10	65.9	65.9	65.9	26.669	249	249;286;167;98;113;38	0	By MS/MS	By MS/MS	By MS/MS	By MS/MS	By MS/MS	By MS/MS	46.2	34.5	65.9	34.1	34.1	46.2	113030000	34141000	2947500
sp|P63261|ACTG_HUMAN;sp|P60709|ACTB_HUMAN;tr|A0A2R8Y793|A0A2R8Y793_HUMAN;tr|I3L3I0|I3L3I0_HUMAN;tr|I3L1U9|I3L1U9_HUMAN;tr|G5E9R0|G5E9R0_HUMAN;tr|K7EM38|K7EM38_HUMAN;tr|E7EVS6|E7EVS6_HUMAN;tr|I3L3R2|I3L3R2_HUMAN;tr|A0A2R8YGF8|A0A2R8YGF8_HUMAN;tr|J3KT65|J3KT65_HUMAN;tr|I3L4N8|I3L4N8_HUMAN;tr|C9JUM1|C9JUM1_HUMAN;tr|C9JZR7|C9JZR7_HUMAN;tr|C9JTX5|C9JTX5_HUMAN;tr|F8WB63|F8WB63_HUMAN;tr|B8ZZJ2|B8ZZJ2_HU…	sp|P63261|ACTG_HUMAN;sp|P60709|ACTB_HUMAN;tr|A0A2R8Y793|A0A2R8Y793_HUMAN;tr|I3L3I0|I3L3I0_HUMAN;tr|I3L1U9|I3L1U9_HUMAN	23;23;21;14;14;10;10;10;10;10;10;10;9;9;8;8;8;7;6;6;6;5;4;3;2;2	23;23;21;14;14;10;10;10;10;10;10;10;9;9;8;8;8;7;6;6;6;5;4;3;2;2	10;10;9;3;3;1;1;1;1;1;1;4;0;0;0;0;0;2;3;0;1;1;1;1;0;1	>sp|P63261|ACTG_HUMAN Actin, cytoplasmic 2 OS=Homo sapiens OX=9606 GN=ACTG1 PE=1 SV=1;>sp|P60709|ACTB_HUMAN Actin, cytoplasmic 1 OS=Homo sapiens OX=9606 GN=ACTB PE=1 SV=1;>tr|A0A2R8Y793|A0A2R8Y793_HUMAN Actin, cytoplasmic 1 (Fragment) OS=Homo sapiens OX=96	26	23	23	10	18	13	19	20	22	20	18	13	19	20	22	20	8	5	9	9	10	9	67.7	67.7	40.5	41.792	375	375;375;309;214;214;125;133;163;164;165;198;241;96;102;80;105;119;1075;157;333;1075;1075;1038;375;52;79	0	By MS/MS	By MS/MS	By MS/MS	By MS/MS	By MS/MS	By MS/MS	58.1	45.6	61.9	64.5	67.7	63.5	831350000	103820000	50882000
sp|P60900|PSA6_HUMAN;tr|G3V5Z7|G3V5Z7_HUMAN;tr|G3V3I1|G3V3I1_HUMAN;tr|G3V295|G3V295_HUMAN;sp|P60900-2|PSA6_HUMAN;tr|H0YJC4|H0YJC4_HUMAN;tr|G3V3U4|G3V3U4_HUMAN;sp|P60900-3|PSA6_HUMAN	sp|P60900|PSA6_HUMAN;tr|G3V5Z7|G3V5Z7_HUMAN;tr|G3V3I1|G3V3I1_HUMAN;tr|G3V295|G3V295_HUMAN;sp|P60900-2|PSA6_HUMAN	3;3;2;2;2;1;1;1	3;3;2;2;2;1;1;1	3;3;2;2;2;1;1;1	>sp|P60900|PSA6_HUMAN Proteasome subunit alpha type-6 OS=Homo sapiens OX=9606 GN=PSMA6 PE=1 SV=1;>tr|G3V5Z7|G3V5Z7_HUMAN Proteasome subunit alpha type OS=Homo sapiens OX=9606 GN=PSMA6 PE=1 SV=1;>tr|G3V3I1|G3V3I1_HUMAN Proteasome subunit alpha type OS=Homo	8	3	3	3	3	1	3	1	1	1	3	1	3	1	1	1	3	1	3	1	1	1	17.9	17.9	17.9	27.399	246	246;252;148;203;227;85;107;167	0	By MS/MS	By matching	By MS/MS	By matching	By MS/MS	By MS/MS	17.9	3.7	17.9	6.9	6.9	6.9	5971300	2988500	409250
sp|P61604|CH10_HUMAN;tr|B8ZZ54|B8ZZ54_HUMAN;tr|B8ZZL8|B8ZZL8_HUMAN;tr|S4R3N1|S4R3N1_HUMAN	sp|P61604|CH10_HUMAN;tr|B8ZZ54|B8ZZ54_HUMAN;tr|B8ZZL8|B8ZZL8_HUMAN;tr|S4R3N1|S4R3N1_HUMAN	2;1;1;1	2;1;1;1	2;1;1;1	>sp|P61604|CH10_HUMAN 10 kDa heat shock protein, mitochondrial OS=Homo sapiens OX=9606 GN=HSPE1 PE=1 SV=2;>tr|B8ZZ54|B8ZZ54_HUMAN 10 kDa heat shock protein, mitochondrial OS=Homo sapiens OX=9606 GN=HSPE1 PE=1 SV=1;>tr|B8ZZL8|B8ZZL8_HUMAN 10 kDa heat shock	4	2	2	2	2	2	2	2	2	2	2	2	2	2	2	2	2	2	2	2	2	2	25.5	25.5	25.5	10.932	102	102;47;101;261	0	By MS/MS	By matching	By MS/MS	By matching	By MS/MS	By MS/MS	25.5	25.5	25.5	25.5	25.5	25.5	66396000	8873300	1165800
tr|Q5T6W2|Q5T6W2_HUMAN;sp|P61978-3|HNRPK_HUMAN;sp|P61978|HNRPK_HUMAN;sp|P61978-2|HNRPK_HUMAN;tr|S4R359|S4R359_HUMAN	tr|Q5T6W2|Q5T6W2_HUMAN;sp|P61978-3|HNRPK_HUMAN;sp|P61978|HNRPK_HUMAN;sp|P61978-2|HNRPK_HUMAN;tr|S4R359|S4R359_HUMAN	2;2;2;2;1	2;2;2;2;1	2;2;2;2;1	>tr|Q5T6W2|Q5T6W2_HUMAN Heterogeneous nuclear ribonucleoprotein K (Fragment) OS=Homo sapiens OX=9606 GN=HNRNPK PE=1 SV=1;>sp|P61978-3|HNRPK_HUMAN Isoform 3 of Heterogeneous nuclear ribonucleoprotein K OS=Homo sapiens OX=9606 GN=HNRNPK;>sp|P61978|HNRPK_HUMA	5	2	2	2	0	0	0	2	0	2	0	0	0	2	0	2	0	0	0	2	0	2	9.5	9.5	9.5	41.807	379	379;440;463;464;100	0	By matching	By matching	By matching	By matching	By matching	By MS/MS	0	0	0	9.5	0	9.5	3652900	0	0
sp|P61981|1433G_HUMAN;tr|A2IDB2|A2IDB2_HUMAN;sp|P31947-2|1433S_HUMAN;sp|Q04917|1433F_HUMAN;sp|P31947|1433S_HUMAN	sp|P61981|1433G_HUMAN	3;1;1;1;1	1;0;0;0;0	1;0;0;0;0	>sp|P61981|1433G_HUMAN 14-3-3 protein gamma OS=Homo sapiens OX=9606 GN=YWHAG PE=1 SV=2	5	3	1	1	1	2	2	2	1	1	1	0	0	0	0	0	1	0	0	0	0	0	13.8	4	4	28.302	247	247;162;216;246;248	1	By MS/MS	By matching	By matching	By matching	By matching	By matching	4	9.7	9.7	9.7	6.5	6.5	225190	225190	0
sp|P62258|1433E_HUMAN;sp|P62258-2|1433E_HUMAN;tr|B4DJF2|B4DJF2_HUMAN;tr|I3L3T1|I3L3T1_HUMAN;tr|K7EIT4|K7EIT4_HUMAN;tr|K7EM20|K7EM20_HUMAN	sp|P62258|1433E_HUMAN;sp|P62258-2|1433E_HUMAN;tr|B4DJF2|B4DJF2_HUMAN;tr|I3L3T1|I3L3T1_HUMAN	6;5;3;3;2;2	6;5;3;3;2;2	5;4;2;2;1;2	>sp|P62258|1433E_HUMAN 14-3-3 protein epsilon OS=Homo sapiens OX=9606 GN=YWHAE PE=1 SV=1;>sp|P62258-2|1433E_HUMAN Isoform SV of 14-3-3 protein epsilon OS=Homo sapiens OX=9606 GN=YWHAE;>tr|B4DJF2|B4DJF2_HUMAN cDNA FLJ51975, moderately similar to 14-3-3 prot	6	6	6	5	5	4	6	5	5	4	5	4	6	5	5	4	5	3	5	4	5	4	33.3	33.3	30.2	29.174	255	255;233;94;107;109;115	0	By MS/MS	By MS/MS	By MS/MS	By matching	By MS/MS	By MS/MS	30.2	17.3	33.3	29	30.2	25.1	37991000	5897100	4833500
sp|P62805|H4_HUMAN	sp|P62805|H4_HUMAN	7	7	7	>sp|P62805|H4_HUMAN Histone H4 OS=Homo sapiens OX=9606 GN=HIST1H4A PE=1 SV=2	1	7	7	7	6	5	7	2	6	5	6	5	7	2	6	5	6	5	7	2	6	5	58.3	58.3	58.3	11.367	103	103	0	By MS/MS	By MS/MS	By MS/MS	By matching	By MS/MS	By MS/MS	57.3	41.7	58.3	21.4	51.5	51.5	166420000	14507000	4410200
tr|B4DV51|B4DV51_HUMAN;tr|F5H018|F5H018_HUMAN;sp|P62826|RAN_HUMAN;tr|B5MDF5|B5MDF5_HUMAN;tr|J3KQE5|J3KQE5_HUMAN	tr|B4DV51|B4DV51_HUMAN;tr|F5H018|F5H018_HUMAN;sp|P62826|RAN_HUMAN;tr|B5MDF5|B5MDF5_HUMAN;tr|J3KQE5|J3KQE5_HUMAN	2;2;2;2;2	2;2;2;2;2	2;2;2;2;2	>tr|B4DV51|B4DV51_HUMAN GTP-binding nuclear protein Ran OS=Homo sapiens OX=9606 GN=RAN PE=1 SV=1;>tr|F5H018|F5H018_HUMAN GTP-binding nuclear protein Ran (Fragment) OS=Homo sapiens OX=9606 GN=RAN PE=1 SV=8;>sp|P62826|RAN_HUMAN GTP-binding nuclear protein Ra	5	2	2	2	2	1	2	1	2	2	2	1	2	1	2	2	2	1	2	1	2	2	18.8	18.8	18.8	14.731	128	128;198;216;233;234	0	By MS/MS	By matching	By MS/MS	By matching	By MS/MS	By MS/MS	18.8	10.9	18.8	10.9	18.8	18.8	16343000	3249200	172410
sp|P63000|RAC1_HUMAN;sp|P63000-2|RAC1_HUMAN	sp|P63000|RAC1_HUMAN;sp|P63000-2|RAC1_HUMAN	1;1	1;1	1;1	>sp|P63000|RAC1_HUMAN Ras-related C3 botulinum toxin substrate 1 OS=Homo sapiens OX=9606 GN=RAC1 PE=1 SV=1;>sp|P63000-2|RAC1_HUMAN Isoform B of Ras-related C3 botulinum toxin substrate 1 OS=Homo sapiens OX=9606 GN=RAC1	2	1	1	1	1	0	0	0	0	0	1	0	0	0	0	0	1	0	0	0	0	0	7.3	7.3	7.3	21.45	192	192;211	1	By MS/MS	By matching	By matching	By matching	By matching	By matching	7.3	0	0	0	0	0	0	0	0
tr|E7ESK7|E7ESK7_HUMAN;sp|P63104|1433Z_HUMAN;tr|E7EX29|E7EX29_HUMAN;tr|E5RGE1|E5RGE1_HUMAN;tr|E5RIR4|E5RIR4_HUMAN;tr|E9PD24|E9PD24_HUMAN;tr|E7EVZ2|E7EVZ2_HUMAN;tr|B0AZS6|B0AZS6_HUMAN;sp|P63104-2|1433Z_HUMAN	tr|E7ESK7|E7ESK7_HUMAN;sp|P63104|1433Z_HUMAN;tr|E7EX29|E7EX29_HUMAN;tr|E5RGE1|E5RGE1_HUMAN;tr|E5RIR4|E5RIR4_HUMAN;tr|E9PD24|E9PD24_HUMAN;tr|E7EVZ2|E7EVZ2_HUMAN	5;5;5;4;4;4;4;1;1	4;4;4;3;3;3;3;1;1	4;4;4;3;3;3;3;1;1	>tr|E7ESK7|E7ESK7_HUMAN 14-3-3 protein zeta/delta (Fragment) OS=Homo sapiens OX=9606 GN=YWHAZ PE=1 SV=1;>sp|P63104|1433Z_HUMAN 14-3-3 protein zeta/delta OS=Homo sapiens OX=9606 GN=YWHAZ PE=1 SV=1;>tr|E7EX29|E7EX29_HUMAN 14-3-3 protein zeta/delta (Fragment)	9	5	4	4	3	3	4	3	3	3	3	2	3	2	3	3	3	2	3	2	3	3	36.5	36.5	36.5	15.697	137	137;245;246;51;75;92;98;168;170	0	By matching	By MS/MS	By MS/MS	By MS/MS	By MS/MS	By MS/MS	27.7	24.8	27.7	27.7	27.7	27.7	26050000	7075000	3158100
tr|C9J5V9|C9J5V9_HUMAN;sp|P67809|YBOX1_HUMAN;tr|H0Y449|H0Y449_HUMAN	tr|C9J5V9|C9J5V9_HUMAN;sp|P67809|YBOX1_HUMAN;tr|H0Y449|H0Y449_HUMAN	2;2;2	2;2;2	2;2;2	>tr|C9J5V9|C9J5V9_HUMAN Nuclease-sensitive element-binding protein 1 (Fragment) OS=Homo sapiens OX=9606 GN=YBX1 PE=1 SV=1;>sp|P67809|YBOX1_HUMAN Nuclease-sensitive element-binding protein 1 OS=Homo sapiens OX=9606 GN=YBX1 PE=1 SV=3;>tr|H0Y449|H0Y449_HUMAN	3	2	2	2	1	0	2	1	0	2	1	0	2	1	0	2	1	0	2	1	0	2	27.3	27.3	27.3	23.598	216	216;324;374	0	By MS/MS	By matching	By MS/MS	By matching	By matching	By matching	13.9	0	27.3	13.9	0	27.3	3180700	0	0
tr|A0A2R8YGX3|A0A2R8YGX3_HUMAN;tr|A0A2R8Y5V9|A0A2R8Y5V9_HUMAN;sp|P67936|TPM4_HUMAN;tr|K7EP68|K7EP68_HUMAN;tr|K7ERG3|K7ERG3_HUMAN;tr|A0A2R8YEU4|A0A2R8YEU4_HUMAN;tr|A0A2R8YH90|A0A2R8YH90_HUMAN;tr|A0A2R8YE05|A0A2R8YE05_HUMAN;tr|K7ENT6|K7ENT6_HUMAN;sp|P67936-2|TPM4_HUMAN;sp|P06753|TPM3_HUMAN;tr|H0YL80|H0YL80_HUMAN;tr|H0YKX5|H0YKX5_HUMAN;tr|H0YKP3|H0YKP3_HUMAN;tr|H0YNC7|H0YNC7_HUMAN;sp|P09493-2|TPM1_H…	tr|A0A2R8YGX3|A0A2R8YGX3_HUMAN;tr|A0A2R8Y5V9|A0A2R8Y5V9_HUMAN;sp|P67936|TPM4_HUMAN;tr|K7EP68|K7EP68_HUMAN;tr|K7ERG3|K7ERG3_HUMAN;tr|A0A2R8YEU4|A0A2R8YEU4_HUMAN;tr|A0A2R8YH90|A0A2R8YH90_HUMAN;tr|A0A2R8YE05|A0A2R8YE05_HUMAN;tr|K7ENT6|K7ENT6_HUMAN;sp|P67936-2|TPM4_HUMAN;sp|P06753|TPM3_HUMAN;tr|H0YL80|H0YL80_HUMAN;tr|H0YKX5|H0YKX5_HUMAN;tr|H0YKP3|H0YKP3_HUMAN;tr|H0YNC7|H0YNC7_HUMAN;sp|P09493-2|TPM1_H…	5;5;5;4;4;4;4;4;4;4;4;3;3;3;3;3;3;3;3;3;3;3;3;3;3;3;3;3;3;3;3;3;1;1;1	1;1;1;0;0;0;0;0;0;0;0;0;0;0;0;0;0;0;0;0;0;0;0;0;0;0;0;0;0;0;0;0;0;0;0	1;1;1;0;0;0;0;0;0;0;0;0;0;0;0;0;0;0;0;0;0;0;0;0;0;0;0;0;0;0;0;0;0;0;0	>tr|A0A2R8YGX3|A0A2R8YGX3_HUMAN Tropomyosin alpha-4 chain OS=Homo sapiens OX=9606 GN=TPM4 PE=4 SV=1;>tr|A0A2R8Y5V9|A0A2R8Y5V9_HUMAN Tropomyosin alpha-4 chain OS=Homo sapiens OX=9606 GN=TPM4 PE=4 SV=1;>sp|P67936|TPM4_HUMAN Tropomyosin alpha-4 chain OS=Homo	35	5	1	1	4	4	5	5	4	5	1	1	1	1	1	1	1	1	1	1	1	1	33.9	10.9	10.9	20.985	183	183;248;248;138;170;173;220;226;247;284;285;68;142;157;223;228;245;245;248;248;248;275;284;284;284;284;284;284;284;284;284;326;90;96;102	0.0035088	By matching	By matching	By MS/MS	By MS/MS	By MS/MS	By MS/MS	33.9	33.9	33.9	33.9	33.9	33.9	13855000	2110800	460090
sp|P68133|ACTS_HUMAN;sp|P68032|ACTC_HUMAN;sp|P63267|ACTH_HUMAN;sp|P62736|ACTA_HUMAN;tr|A6NL76|A6NL76_HUMAN;tr|C9JFL5|C9JFL5_HUMAN;tr|F6UVQ4|F6UVQ4_HUMAN;tr|F6QUT6|F6QUT6_HUMAN	sp|P68133|ACTS_HUMAN;sp|P68032|ACTC_HUMAN;sp|P63267|ACTH_HUMAN;sp|P62736|ACTA_HUMAN;tr|A6NL76|A6NL76_HUMAN;tr|C9JFL5|C9JFL5_HUMAN;tr|F6UVQ4|F6UVQ4_HUMAN;tr|F6QUT6|F6QUT6_HUMAN	15;15;13;13;12;9;9;9	2;2;1;1;2;1;1;1	2;2;1;1;2;1;1;1	>sp|P68133|ACTS_HUMAN Actin, alpha skeletal muscle OS=Homo sapiens OX=9606 GN=ACTA1 PE=1 SV=1;>sp|P68032|ACTC_HUMAN Actin, alpha cardiac muscle 1 OS=Homo sapiens OX=9606 GN=ACTC1 PE=1 SV=1;>sp|P63267|ACTH_HUMAN Actin, gamma-enteric smooth muscle OS=Homo sa	8	15	2	2	12	10	12	13	14	13	2	2	2	2	2	2	2	2	2	2	2	2	31.3	7.2	7.2	42.051	377	377;377;376;377;254;144;151;151	0	By MS/MS	By MS/MS	By MS/MS	By MS/MS	By MS/MS	By MS/MS	29.7	25.2	28.1	29.7	31.3	29.7	0	0	0
sp|Q5VTE0|EF1A3_HUMAN;sp|P68104|EF1A1_HUMAN;tr|A0A087WVQ9|A0A087WVQ9_HUMAN;sp|P68104-2|EF1A1_HUMAN;sp|Q05639|EF1A2_HUMAN;tr|A0A2R8Y660|A0A2R8Y660_HUMAN;tr|A0A2R8Y488|A0A2R8Y488_HUMAN;tr|A0A087WV01|A0A087WV01_HUMAN;tr|A6PW80|A6PW80_HUMAN;tr|A0A2R8YDN5|A0A2R8YDN5_HUMAN;tr|Q5JR01|Q5JR01_HUMAN	sp|Q5VTE0|EF1A3_HUMAN;sp|P68104|EF1A1_HUMAN;tr|A0A087WVQ9|A0A087WVQ9_HUMAN;sp|P68104-2|EF1A1_HUMAN;sp|Q05639|EF1A2_HUMAN	7;7;6;6;5;3;3;3;2;2;2	7;7;6;6;5;3;3;3;2;2;2	7;7;6;6;5;3;3;3;2;2;2	>sp|Q5VTE0|EF1A3_HUMAN Putative elongation factor 1-alpha-like 3 OS=Homo sapiens OX=9606 GN=EEF1A1P5 PE=5 SV=1;>sp|P68104|EF1A1_HUMAN Elongation factor 1-alpha 1 OS=Homo sapiens OX=9606 GN=EEF1A1 PE=1 SV=1;>tr|A0A087WVQ9|A0A087WVQ9_HUMAN Elongation factor	11	7	7	7	6	4	4	7	6	6	6	4	4	7	6	6	6	4	4	7	6	6	24.5	24.5	24.5	50.184	462	462;462;441;441;463;152;173;426;106;106;145	0	By MS/MS	By MS/MS	By MS/MS	By MS/MS	By MS/MS	By MS/MS	18.4	12.1	16.2	24.5	22.5	22.5	110480000	26046000	2408100
sp|P68363|TBA1B_HUMAN;sp|P68363-2|TBA1B_HUMAN;sp|Q71U36-2|TBA1A_HUMAN;sp|Q71U36|TBA1A_HUMAN;sp|P68366-2|TBA4A_HUMAN;sp|P68366|TBA4A_HUMAN;sp|Q13748|TBA3C_HUMAN;tr|F8VVB9|F8VVB9_HUMAN;sp|Q13748-2|TBA3C_HUMAN;sp|Q6PEY2|TBA3E_HUMAN;sp|Q9NY65-2|TBA8_HUMAN;sp|Q9NY65|TBA8_HUMAN;tr|C9J2C0|C9J2C0_HUMAN;tr|F8VQQ4|F8VQQ4_HUMAN;tr|F8VRZ4|F8VRZ4_HUMAN;tr|F8VS66|F8VS66_HUMAN;tr|F8VX09|F8VX09_HUMAN;tr|F8VWV9|F…	sp|P68363|TBA1B_HUMAN;sp|P68363-2|TBA1B_HUMAN;sp|Q71U36-2|TBA1A_HUMAN;sp|Q71U36|TBA1A_HUMAN;sp|P68366-2|TBA4A_HUMAN;sp|P68366|TBA4A_HUMAN;sp|Q13748|TBA3C_HUMAN;tr|F8VVB9|F8VVB9_HUMAN;sp|Q13748-2|TBA3C_HUMAN;sp|Q6PEY2|TBA3E_HUMAN;sp|Q9NY65-2|TBA8_HUMAN;sp|Q9NY65|TBA8_HUMAN;tr|C9J2C0|C9J2C0_HUMAN	17;15;15;15;12;12;12;10;10;10;9;9;9;7;6;6;5;5;5;4;3;2;2;2;2;2;2;2;1;1;1	17;15;15;15;12;12;12;10;10;10;9;9;9;7;6;6;5;5;5;4;3;2;2;2;2;2;2;2;1;1;1	3;3;2;2;3;3;2;0;2;2;1;1;1;0;0;0;0;0;1;1;0;0;0;0;0;0;0;0;0;0;0	>sp|P68363|TBA1B_HUMAN Tubulin alpha-1B chain OS=Homo sapiens OX=9606 GN=TUBA1B PE=1 SV=1;>sp|P68363-2|TBA1B_HUMAN Isoform 2 of Tubulin alpha-1B chain OS=Homo sapiens OX=9606 GN=TUBA1B;>sp|Q71U36-2|TBA1A_HUMAN Isoform 2 of Tubulin alpha-1A chain OS=Homo sa	31	17	17	3	16	10	17	15	17	14	16	10	17	15	17	14	3	0	3	3	3	2	50.6	50.6	12	50.151	451	451;335;416;451;433;448;450;246;418;450;383;449;467;219;112;130;75;81;156;275;49;47;119;153;180;198;406;446;26;231;241	0	By MS/MS	By MS/MS	By MS/MS	By MS/MS	By MS/MS	By MS/MS	50.6	31.9	50.6	47.5	50.6	39.7	354570000	73611000	14640000
sp|P68371|TBB4B_HUMAN;sp|P04350|TBB4A_HUMAN;tr|M0QY85|M0QY85_HUMAN;tr|M0R2D3|M0R2D3_HUMAN;sp|A6NNZ2|TBB8L_HUMAN;tr|M0R0X0|M0R0X0_HUMAN;tr|M0QY37|M0QY37_HUMAN;tr|M0QX14|M0QX14_HUMAN;tr|M0QZL7|M0QZL7_HUMAN;tr|M0QYM7|M0QYM7_HUMAN;tr|M0R278|M0R278_HUMAN;tr|M0R042|M0R042_HUMAN;tr|G3V2A3|G3V2A3_HUMAN;sp|Q9H4B7|TBB1_HUMAN;CON__ENSEMBL:ENSBTAP00000025008;tr|M0R2T4|M0R2T4_HUMAN;tr|M0R1I1|M0R1I1_HUMAN;tr|A…	sp|P68371|TBB4B_HUMAN;sp|P04350|TBB4A_HUMAN	21;15;5;5;5;4;4;4;4;4;4;3;3;3;3;2;1;1	21;15;5;5;5;4;4;4;4;4;4;3;3;3;3;2;1;1	4;3;3;3;0;3;3;3;2;3;2;2;0;0;0;2;0;0	>sp|P68371|TBB4B_HUMAN Tubulin beta-4B chain OS=Homo sapiens OX=9606 GN=TUBB4B PE=1 SV=1;>sp|P04350|TBB4A_HUMAN Tubulin beta-4A chain OS=Homo sapiens OX=9606 GN=TUBB4A PE=1 SV=2	18	21	21	4	17	11	20	20	19	19	17	11	20	20	19	19	4	1	4	4	4	4	61.8	61.8	13	49.83	445	445;444;107;155;444;103;109;110;157;160;167;144;189;451;536;104;74;119	0	By MS/MS	By MS/MS	By MS/MS	By MS/MS	By MS/MS	By MS/MS	50.1	35.3	57.8	61.8	60	59.8	142620000	25377000	3209800
tr|A0A2R8Y7C0|A0A2R8Y7C0_HUMAN;sp|P69905|HBA_HUMAN;tr|G3V1N2|G3V1N2_HUMAN	tr|A0A2R8Y7C0|A0A2R8Y7C0_HUMAN;sp|P69905|HBA_HUMAN;tr|G3V1N2|G3V1N2_HUMAN	3;3;2	1;1;0	1;1;0	>tr|A0A2R8Y7C0|A0A2R8Y7C0_HUMAN Hemoglobin subunit alpha (Fragment) OS=Homo sapiens OX=9606 GN=HBA2 PE=4 SV=1;>sp|P69905|HBA_HUMAN Hemoglobin subunit alpha OS=Homo sapiens OX=9606 GN=HBA1 PE=1 SV=2;>tr|G3V1N2|G3V1N2_HUMAN HCG1745306, isoform CRA_a OS=Homo	3	3	1	1	2	2	1	2	3	2	0	0	0	0	1	0	0	0	0	0	1	0	29.9	11.2	11.2	13.842	134	134;142;110	0.0036101	By matching	By matching	By matching	By matching	By MS/MS	By matching	18.7	18.7	6.7	18.7	29.9	18.7	5937000	0	0
sp|P78509-2|RELN_HUMAN;sp|P78509-3|RELN_HUMAN;tr|J3KQ66|J3KQ66_HUMAN;sp|P78509|RELN_HUMAN	sp|P78509-2|RELN_HUMAN;sp|P78509-3|RELN_HUMAN;tr|J3KQ66|J3KQ66_HUMAN;sp|P78509|RELN_HUMAN	46;45;45;45	46;45;45;45	46;45;45;45	>sp|P78509-2|RELN_HUMAN Isoform 2 of Reelin OS=Homo sapiens OX=9606 GN=RELN;>sp|P78509-3|RELN_HUMAN Isoform 3 of Reelin OS=Homo sapiens OX=9606 GN=RELN;>tr|J3KQ66|J3KQ66_HUMAN Reelin OS=Homo sapiens OX=9606 GN=RELN PE=1 SV=1;>sp|P78509|RELN_HUMAN Reelin OS	4	46	46	46	26	36	37	36	41	33	26	36	37	36	41	33	26	36	37	36	41	33	19.4	19.4	19.4	388.2	3458	3458;3427;3460;3460	0	By MS/MS	By MS/MS	By MS/MS	By MS/MS	By MS/MS	By MS/MS	10.2	15.3	16.2	15.6	17.5	13.6	462220000	34856000	74773000
sp|Q00610-2|CLH1_HUMAN;sp|Q00610|CLH1_HUMAN;tr|A0A087WVQ6|A0A087WVQ6_HUMAN;tr|J3KS13|J3KS13_HUMAN	sp|Q00610-2|CLH1_HUMAN;sp|Q00610|CLH1_HUMAN;tr|A0A087WVQ6|A0A087WVQ6_HUMAN	4;4;4;1	4;4;4;1	4;4;4;1	>sp|Q00610-2|CLH1_HUMAN Isoform 2 of Clathrin heavy chain 1 OS=Homo sapiens OX=9606 GN=CLTC;>sp|Q00610|CLH1_HUMAN Clathrin heavy chain 1 OS=Homo sapiens OX=9606 GN=CLTC PE=1 SV=5;>tr|A0A087WVQ6|A0A087WVQ6_HUMAN Clathrin heavy chain OS=Homo sapiens OX=9606	4	4	4	4	3	1	3	3	2	4	3	1	3	3	2	4	3	1	3	3	2	4	3.1	3.1	3.1	187.89	1639	1639;1675;1679;612	0	By MS/MS	By matching	By MS/MS	By matching	By MS/MS	By MS/MS	2.1	0.7	2.4	2.4	1.7	3.1	18971000	3949900	356870
sp|Q01082|SPTB2_HUMAN;tr|A0A087WUZ3|A0A087WUZ3_HUMAN;sp|Q01082-3|SPTB2_HUMAN;sp|Q01082-2|SPTB2_HUMAN;tr|F8W6C1|F8W6C1_HUMAN	sp|Q01082|SPTB2_HUMAN;tr|A0A087WUZ3|A0A087WUZ3_HUMAN;sp|Q01082-3|SPTB2_HUMAN;sp|Q01082-2|SPTB2_HUMAN	14;14;13;13;1	14;14;13;13;1	14;14;13;13;1	>sp|Q01082|SPTB2_HUMAN Spectrin beta chain, non-erythrocytic 1 OS=Homo sapiens OX=9606 GN=SPTBN1 PE=1 SV=2;>tr|A0A087WUZ3|A0A087WUZ3_HUMAN Spectrin beta chain OS=Homo sapiens OX=9606 GN=SPTBN1 PE=1 SV=1;>sp|Q01082-3|SPTB2_HUMAN Isoform 2 of Spectrin beta c	5	14	14	14	9	4	12	9	9	14	9	4	12	9	9	14	9	4	12	9	9	14	8	8	8	274.61	2364	2364;2366;2155;2168;690	0	By MS/MS	By matching	By MS/MS	By MS/MS	By MS/MS	By MS/MS	6	2.6	7.3	5.9	5.5	8	48828000	5119400	743050
sp|Q01518|CAP1_HUMAN;tr|Q5T0R7|Q5T0R7_HUMAN;tr|Q5T0R6|Q5T0R6_HUMAN;tr|Q5T0R5|Q5T0R5_HUMAN;tr|Q5T0R4|Q5T0R4_HUMAN;tr|Q5T0R3|Q5T0R3_HUMAN;tr|Q5T0R2|Q5T0R2_HUMAN;tr|Q5T0R1|Q5T0R1_HUMAN;sp|Q01518-2|CAP1_HUMAN;tr|Q5T0R9|Q5T0R9_HUMAN	sp|Q01518|CAP1_HUMAN;tr|Q5T0R7|Q5T0R7_HUMAN;tr|Q5T0R6|Q5T0R6_HUMAN;tr|Q5T0R5|Q5T0R5_HUMAN;tr|Q5T0R4|Q5T0R4_HUMAN;tr|Q5T0R3|Q5T0R3_HUMAN;tr|Q5T0R2|Q5T0R2_HUMAN;tr|Q5T0R1|Q5T0R1_HUMAN;sp|Q01518-2|CAP1_HUMAN	3;2;2;2;2;2;2;2;2;1	3;2;2;2;2;2;2;2;2;1	3;2;2;2;2;2;2;2;2;1	>sp|Q01518|CAP1_HUMAN Adenylyl cyclase-associated protein 1 OS=Homo sapiens OX=9606 GN=CAP1 PE=1 SV=5;>tr|Q5T0R7|Q5T0R7_HUMAN Adenylyl cyclase-associated protein 1 (Fragment) OS=Homo sapiens OX=9606 GN=CAP1 PE=1 SV=1;>tr|Q5T0R6|Q5T0R6_HUMAN Adenylyl cyclas	10	3	3	3	2	0	3	0	3	1	2	0	3	0	3	1	2	0	3	0	3	1	9.7	9.7	9.7	51.901	475	475;174;176;179;201;203;208;215;474;262	0	By MS/MS	By matching	By MS/MS	By matching	By MS/MS	By matching	7.4	0	9.7	0	9.7	4.8	3409700	329490	0
sp|Q02818|NUCB1_HUMAN	sp|Q02818|NUCB1_HUMAN	2	2	2	>sp|Q02818|NUCB1_HUMAN Nucleobindin-1 OS=Homo sapiens OX=9606 GN=NUCB1 PE=1 SV=4	1	2	2	2	1	1	1	1	1	2	1	1	1	1	1	2	1	1	1	1	1	2	4.8	4.8	4.8	53.879	461	461	0.0038023	By matching	By matching	By matching	By matching	By matching	By MS/MS	2.6	2.6	2.6	2.6	2.6	4.8	4017300	0	0
sp|Q03468|ERCC6_HUMAN	sp|Q03468|ERCC6_HUMAN	1	1	1	>sp|Q03468|ERCC6_HUMAN DNA excision repair protein ERCC-6 OS=Homo sapiens OX=9606 GN=ERCC6 PE=1 SV=1	1	1	1	1	1	0	0	0	0	0	1	0	0	0	0	0	1	0	0	0	0	0	0.5	0.5	0.5	168.41	1493	1493	1	By MS/MS	By matching	By matching	By matching	By matching	By matching	0.5	0	0	0	0	0	0	0	0
sp|Q04760-2|LGUL_HUMAN;sp|Q04760|LGUL_HUMAN	sp|Q04760-2|LGUL_HUMAN;sp|Q04760|LGUL_HUMAN	1;1	1;1	1;1	>sp|Q04760-2|LGUL_HUMAN Isoform 2 of Lactoylglutathione lyase OS=Homo sapiens OX=9606 GN=GLO1;>sp|Q04760|LGUL_HUMAN Lactoylglutathione lyase OS=Homo sapiens OX=9606 GN=GLO1 PE=1 SV=4	2	1	1	1	1	0	0	0	0	0	1	0	0	0	0	0	1	0	0	0	0	0	11.8	11.8	11.8	19.043	169	169;184	0.006689	By MS/MS	By matching	By matching	By matching	By matching	By matching	11.8	0	0	0	0	0	301370	301370	0
sp|Q04828|AK1C1_HUMAN;tr|A6NHU4|A6NHU4_HUMAN;tr|S4R3Z2|S4R3Z2_HUMAN;tr|A0A0A0MSS8|A0A0A0MSS8_HUMAN;sp|P42330|AK1C3_HUMAN;tr|S4R3D5|S4R3D5_HUMAN;sp|P17516|AK1C4_HUMAN;sp|P52895-2|AK1C2_HUMAN;tr|S4R3P0|S4R3P0_HUMAN;tr|H0Y804|H0Y804_HUMAN;tr|B4DK69|B4DK69_HUMAN;sp|P52895|AK1C2_HUMAN;sp|P42330-2|AK1C3_HUMAN	sp|Q04828|AK1C1_HUMAN;tr|A6NHU4|A6NHU4_HUMAN;tr|S4R3Z2|S4R3Z2_HUMAN;tr|A0A0A0MSS8|A0A0A0MSS8_HUMAN;sp|P42330|AK1C3_HUMAN;tr|S4R3D5|S4R3D5_HUMAN;sp|P17516|AK1C4_HUMAN	5;4;4;4;4;3;3;2;2;2;2;2;1	5;4;4;4;4;3;3;2;2;2;2;2;1	5;4;4;4;4;3;3;2;2;2;2;2;1	>sp|Q04828|AK1C1_HUMAN Aldo-keto reductase family 1 member C1 OS=Homo sapiens OX=9606 GN=AKR1C1 PE=1 SV=1;>tr|A6NHU4|A6NHU4_HUMAN Aldo-keto reductase family 1 member C1 OS=Homo sapiens OX=9606 GN=AKR1C1 PE=1 SV=1;>tr|S4R3Z2|S4R3Z2_HUMAN Aldo-keto reductase	13	5	5	5	5	2	4	4	5	5	5	2	4	4	5	5	5	2	4	4	5	5	21.7	21.7	21.7	36.788	323	323;205;300;323;323;155;323;139;200;248;297;323;204	0	By MS/MS	By matching	By MS/MS	By MS/MS	By MS/MS	By MS/MS	21.7	9.3	18	18	21.7	21.7	22294000	10019000	219980
sp|Q06033-2|ITIH3_HUMAN;sp|Q06033|ITIH3_HUMAN;tr|E7ET33|E7ET33_HUMAN;tr|A0A087WW43|A0A087WW43_HUMAN	sp|Q06033-2|ITIH3_HUMAN;sp|Q06033|ITIH3_HUMAN;tr|E7ET33|E7ET33_HUMAN;tr|A0A087WW43|A0A087WW43_HUMAN	11;11;10;8	11;11;10;8	8;8;7;5	>sp|Q06033-2|ITIH3_HUMAN Isoform 2 of Inter-alpha-trypsin inhibitor heavy chain H3 OS=Homo sapiens OX=9606 GN=ITIH3;>sp|Q06033|ITIH3_HUMAN Inter-alpha-trypsin inhibitor heavy chain H3 OS=Homo sapiens OX=9606 GN=ITIH3 PE=1 SV=2;>tr|E7ET33|E7ET33_HUMAN Inter	4	11	11	8	10	10	10	8	10	10	10	10	10	8	10	10	7	7	7	5	7	7	15.1	15.1	12.4	99.326	886	886;890;698;670	0	By MS/MS	By MS/MS	By MS/MS	By MS/MS	By MS/MS	By MS/MS	13.8	14.6	13.8	10.2	15.1	13.8	157450000	7302200	5768600
sp|Q06323|PSME1_HUMAN;sp|Q06323-3|PSME1_HUMAN;sp|Q06323-2|PSME1_HUMAN;tr|H0YLU2|H0YLU2_HUMAN;tr|H0YKK6|H0YKK6_HUMAN	sp|Q06323|PSME1_HUMAN;sp|Q06323-3|PSME1_HUMAN;sp|Q06323-2|PSME1_HUMAN;tr|H0YLU2|H0YLU2_HUMAN	4;3;3;2;1	4;3;3;2;1	4;3;3;2;1	>sp|Q06323|PSME1_HUMAN Proteasome activator complex subunit 1 OS=Homo sapiens OX=9606 GN=PSME1 PE=1 SV=1;>sp|Q06323-3|PSME1_HUMAN Isoform 3 of Proteasome activator complex subunit 1 OS=Homo sapiens OX=9606 GN=PSME1;>sp|Q06323-2|PSME1_HUMAN Isoform 2 of Pro	5	4	4	4	4	0	1	2	2	2	4	0	1	2	2	2	4	0	1	2	2	2	17.7	17.7	17.7	28.723	249	249;233;250;114;90	0	By MS/MS	By matching	By matching	By matching	By MS/MS	By matching	17.7	0	4.8	7.6	7.6	7.2	5834000	3867500	0
sp|Q06481-5|APLP2_HUMAN;sp|Q06481-4|APLP2_HUMAN;sp|Q06481-2|APLP2_HUMAN;sp|Q06481-3|APLP2_HUMAN;sp|Q06481-6|APLP2_HUMAN;sp|Q06481|APLP2_HUMAN	sp|Q06481-5|APLP2_HUMAN;sp|Q06481-4|APLP2_HUMAN;sp|Q06481-2|APLP2_HUMAN;sp|Q06481-3|APLP2_HUMAN;sp|Q06481-6|APLP2_HUMAN;sp|Q06481|APLP2_HUMAN	3;3;3;3;3;3	3;3;3;3;3;3	3;3;3;3;3;3	>sp|Q06481-5|APLP2_HUMAN Isoform 5 of Amyloid-like protein 2 OS=Homo sapiens OX=9606 GN=APLP2;>sp|Q06481-4|APLP2_HUMAN Isoform 4 of Amyloid-like protein 2 OS=Homo sapiens OX=9606 GN=APLP2;>sp|Q06481-2|APLP2_HUMAN Isoform 2 of Amyloid-like protein 2 OS=Homo	6	3	3	3	3	1	3	3	3	3	3	1	3	3	3	3	3	1	3	3	3	3	9.4	9.4	9.4	59.151	522	522;695;707;751;761;763	0	By matching	By matching	By MS/MS	By MS/MS	By MS/MS	By MS/MS	9.4	2.3	9.4	9.4	9.4	9.4	6336100	1021800	0
sp|Q06830|PRDX1_HUMAN;tr|A0A0A0MSI0|A0A0A0MSI0_HUMAN;tr|A0A0A0MRQ5|A0A0A0MRQ5_HUMAN;tr|H7C3T4|H7C3T4_HUMAN;sp|P32119|PRDX2_HUMAN;sp|Q13162|PRDX4_HUMAN	sp|Q06830|PRDX1_HUMAN;tr|A0A0A0MSI0|A0A0A0MSI0_HUMAN;tr|A0A0A0MRQ5|A0A0A0MRQ5_HUMAN	7;6;4;1;1;1	7;6;4;1;1;1	7;6;4;1;1;1	>sp|Q06830|PRDX1_HUMAN Peroxiredoxin-1 OS=Homo sapiens OX=9606 GN=PRDX1 PE=1 SV=1;>tr|A0A0A0MSI0|A0A0A0MSI0_HUMAN Peroxiredoxin-1 (Fragment) OS=Homo sapiens OX=9606 GN=PRDX1 PE=1 SV=1;>tr|A0A0A0MRQ5|A0A0A0MRQ5_HUMAN Peroxiredoxin-1 OS=Homo sapiens OX=9606	6	7	7	7	7	4	7	6	6	7	7	4	7	6	6	7	7	4	7	6	6	7	42.2	42.2	42.2	22.11	199	199;171;97;161;198;271	0	By MS/MS	By MS/MS	By MS/MS	By MS/MS	By MS/MS	By MS/MS	42.2	21.1	42.2	38.2	38.2	42.2	83440000	32114000	2733300
tr|I3L3Q7|I3L3Q7_HUMAN;tr|I3L3B0|I3L3B0_HUMAN;sp|Q07021|C1QBP_HUMAN	tr|I3L3Q7|I3L3Q7_HUMAN;tr|I3L3B0|I3L3B0_HUMAN;sp|Q07021|C1QBP_HUMAN	1;1;1	1;1;1	1;1;1	>tr|I3L3Q7|I3L3Q7_HUMAN Complement component 1 Q subcomponent-binding protein, mitochondrial (Fragment) OS=Homo sapiens OX=9606 GN=C1QBP PE=1 SV=1;>tr|I3L3B0|I3L3B0_HUMAN Complement component 1 Q subcomponent-binding protein, mitochondrial OS=Homo sapiens	3	1	1	1	1	0	1	0	1	1	1	0	1	0	1	1	1	0	1	0	1	1	8.5	8.5	8.5	20.006	177	177;178;282	0	By matching	By matching	By matching	By matching	By matching	By MS/MS	8.5	0	8.5	0	8.5	8.5	0	0	0
sp|Q08380|LG3BP_HUMAN;tr|K7EP36|K7EP36_HUMAN;tr|K7ESM3|K7ESM3_HUMAN;tr|K7EKQ5|K7EKQ5_HUMAN;tr|K7ERZ6|K7ERZ6_HUMAN;tr|K7EJD3|K7EJD3_HUMAN;tr|K7ES75|K7ES75_HUMAN;tr|K7EN99|K7EN99_HUMAN;tr|K7EJY8|K7EJY8_HUMAN;tr|K7EQT9|K7EQT9_HUMAN	sp|Q08380|LG3BP_HUMAN	18;7;5;5;3;3;2;2;2;1	18;7;5;5;3;3;2;2;2;1	18;7;5;5;3;3;2;2;2;1	>sp|Q08380|LG3BP_HUMAN Galectin-3-binding protein OS=Homo sapiens OX=9606 GN=LGALS3BP PE=1 SV=1	10	18	18	18	14	15	17	18	17	17	14	15	17	18	17	17	14	15	17	18	17	17	36.9	36.9	36.9	65.33	585	585;259;209;210;131;205;88;113;144;48	0	By MS/MS	By MS/MS	By MS/MS	By MS/MS	By MS/MS	By MS/MS	23.9	28.4	36.8	36.9	36.8	35	1228700000	98996000	228020000
sp|Q08830|FGL1_HUMAN	sp|Q08830|FGL1_HUMAN	2	2	2	>sp|Q08830|FGL1_HUMAN Fibrinogen-like protein 1 OS=Homo sapiens OX=9606 GN=FGL1 PE=1 SV=3	1	2	2	2	1	0	2	1	1	1	1	0	2	1	1	1	1	0	2	1	1	1	11.5	11.5	11.5	36.379	312	312	0	By matching	By matching	By MS/MS	By matching	By matching	By matching	2.9	0	11.5	2.9	2.9	2.9	3825900	510640	0
sp|Q12794-3|HYAL1_HUMAN;sp|Q12794-7|HYAL1_HUMAN;sp|Q12794-2|HYAL1_HUMAN;sp|Q12794|HYAL1_HUMAN	sp|Q12794-3|HYAL1_HUMAN;sp|Q12794-7|HYAL1_HUMAN;sp|Q12794-2|HYAL1_HUMAN;sp|Q12794|HYAL1_HUMAN	1;1;1;1	1;1;1;1	1;1;1;1	>sp|Q12794-3|HYAL1_HUMAN Isoform 3 of Hyaluronidase-1 OS=Homo sapiens OX=9606 GN=HYAL1;>sp|Q12794-7|HYAL1_HUMAN Isoform 7 of Hyaluronidase-1 OS=Homo sapiens OX=9606 GN=HYAL1;>sp|Q12794-2|HYAL1_HUMAN Isoform 2 of Hyaluronidase-1 OS=Homo sapiens OX=9606 GN=H	4	1	1	1	0	0	1	1	1	0	0	0	1	1	1	0	0	0	1	1	1	0	5.5	5.5	5.5	27.958	253	253;336;405;435	0.0067568	By matching	By matching	By matching	By matching	By MS/MS	By matching	0	0	5.5	5.5	5.5	0	1294600	0	0
sp|Q12906-5|ILF3_HUMAN;sp|Q12906-4|ILF3_HUMAN;sp|Q12906-2|ILF3_HUMAN;sp|Q12906-6|ILF3_HUMAN;sp|Q12906-3|ILF3_HUMAN;sp|Q12906|ILF3_HUMAN;sp|Q12906-7|ILF3_HUMAN;tr|K7EQR9|K7EQR9_HUMAN;tr|K7EKJ9|K7EKJ9_HUMAN	sp|Q12906-5|ILF3_HUMAN;sp|Q12906-4|ILF3_HUMAN;sp|Q12906-2|ILF3_HUMAN;sp|Q12906-6|ILF3_HUMAN;sp|Q12906-3|ILF3_HUMAN;sp|Q12906|ILF3_HUMAN;sp|Q12906-7|ILF3_HUMAN	4;4;4;4;4;4;4;1;1	4;4;4;4;4;4;4;1;1	4;4;4;4;4;4;4;1;1	>sp|Q12906-5|ILF3_HUMAN Isoform 5 of Interleukin enhancer-binding factor 3 OS=Homo sapiens OX=9606 GN=ILF3;>sp|Q12906-4|ILF3_HUMAN Isoform 4 of Interleukin enhancer-binding factor 3 OS=Homo sapiens OX=9606 GN=ILF3;>sp|Q12906-2|ILF3_HUMAN Isoform 2 of Inter	9	4	4	4	3	0	3	3	4	4	3	0	3	3	4	4	3	0	3	3	4	4	6.4	6.4	6.4	74.606	690	690;698;702;706;764;894;898;180;254	0	By MS/MS	By matching	By MS/MS	By matching	By MS/MS	By MS/MS	5.1	0	5.1	5.1	6.4	6.4	12288000	395360	0
sp|Q13011|ECH1_HUMAN	sp|Q13011|ECH1_HUMAN	2	2	2	>sp|Q13011|ECH1_HUMAN Delta(3,5)-Delta(2,4)-dienoyl-CoA isomerase, mitochondrial OS=Homo sapiens OX=9606 GN=ECH1 PE=1 SV=2	1	2	2	2	2	0	2	1	2	2	2	0	2	1	2	2	2	0	2	1	2	2	8.5	8.5	8.5	35.816	328	328	0	By MS/MS	By matching	By MS/MS	By matching	By MS/MS	By MS/MS	8.5	0	8.5	4.9	8.5	8.5	9693700	1164900	0
tr|H0YJG9|H0YJG9_HUMAN;sp|Q13268|DHRS2_HUMAN;tr|H0YJP4|H0YJP4_HUMAN;tr|C9JZP6|C9JZP6_HUMAN;sp|Q13268-2|DHRS2_HUMAN	tr|H0YJG9|H0YJG9_HUMAN;sp|Q13268|DHRS2_HUMAN;tr|H0YJP4|H0YJP4_HUMAN;tr|C9JZP6|C9JZP6_HUMAN;sp|Q13268-2|DHRS2_HUMAN	2;2;1;1;1	2;2;1;1;1	2;2;1;1;1	>tr|H0YJG9|H0YJG9_HUMAN Dehydrogenase/reductase SDR family member 2, mitochondrial (Fragment) OS=Homo sapiens OX=9606 GN=DHRS2 PE=1 SV=1;>sp|Q13268|DHRS2_HUMAN Dehydrogenase/reductase SDR family member 2, mitochondrial OS=Homo sapiens OX=9606 GN=DHRS2 PE=1	5	2	2	2	2	0	1	0	2	2	2	0	1	0	2	2	2	0	1	0	2	2	11.8	11.8	11.8	17.471	161	161;280;180;225;300	0.0037879	By matching	By matching	By matching	By matching	By MS/MS	By matching	11.8	0	5.6	0	11.8	11.8	6848500	714860	0
sp|Q13509|TBB3_HUMAN;tr|A0A0B4J269|A0A0B4J269_HUMAN;sp|Q13509-2|TBB3_HUMAN	sp|Q13509|TBB3_HUMAN;tr|A0A0B4J269|A0A0B4J269_HUMAN;sp|Q13509-2|TBB3_HUMAN	13;13;12	3;3;3	1;1;1	>sp|Q13509|TBB3_HUMAN Tubulin beta-3 chain OS=Homo sapiens OX=9606 GN=TUBB3 PE=1 SV=2;>tr|A0A0B4J269|A0A0B4J269_HUMAN Uncharacterized protein OS=Homo sapiens OX=9606 PE=1 SV=1;>sp|Q13509-2|TBB3_HUMAN Isoform 2 of Tubulin beta-3 chain OS=Homo sapiens OX=960	3	13	3	1	11	7	13	10	12	9	3	1	3	1	3	1	1	1	1	1	1	1	31.8	8.4	3.8	50.432	450	450;797;378	0	By MS/MS	By matching	By MS/MS	By MS/MS	By MS/MS	By MS/MS	29.8	22.7	31.8	27.1	31.8	25.1	6561600	1668000	211250
tr|F5GXJ9|F5GXJ9_HUMAN;sp|Q13740-2|CD166_HUMAN;sp|Q13740|CD166_HUMAN;sp|Q13740-3|CD166_HUMAN;sp|Q13740-4|CD166_HUMAN;tr|H7C543|H7C543_HUMAN	tr|F5GXJ9|F5GXJ9_HUMAN;sp|Q13740-2|CD166_HUMAN;sp|Q13740|CD166_HUMAN;sp|Q13740-3|CD166_HUMAN;sp|Q13740-4|CD166_HUMAN;tr|H7C543|H7C543_HUMAN	2;2;2;1;1;1	2;2;2;1;1;1	2;2;2;1;1;1	>tr|F5GXJ9|F5GXJ9_HUMAN CD166 antigen OS=Homo sapiens OX=9606 GN=ALCAM PE=1 SV=1;>sp|Q13740-2|CD166_HUMAN Isoform 2 of CD166 antigen OS=Homo sapiens OX=9606 GN=ALCAM;>sp|Q13740|CD166_HUMAN CD166 antigen OS=Homo sapiens OX=9606 GN=ALCAM PE=1 SV=2;>sp|Q13740	6	2	2	2	1	0	1	0	1	2	1	0	1	0	1	2	1	0	1	0	1	2	9	9	9	59.528	532	532;570;583;133;305;344	0	By matching	By matching	By matching	By matching	By MS/MS	By MS/MS	3.6	0	5.5	0	3.6	9	1651900	0	0
sp|Q13813-3|SPTN1_HUMAN;tr|A0A0D9SF54|A0A0D9SF54_HUMAN;sp|Q13813|SPTN1_HUMAN;sp|Q13813-2|SPTN1_HUMAN;tr|A0A0D9SGF6|A0A0D9SGF6_HUMAN	sp|Q13813-3|SPTN1_HUMAN;tr|A0A0D9SF54|A0A0D9SF54_HUMAN;sp|Q13813|SPTN1_HUMAN;sp|Q13813-2|SPTN1_HUMAN;tr|A0A0D9SGF6|A0A0D9SGF6_HUMAN	10;10;10;10;10	10;10;10;10;10	10;10;10;10;10	>sp|Q13813-3|SPTN1_HUMAN Isoform 3 of Spectrin alpha chain, non-erythrocytic 1 OS=Homo sapiens OX=9606 GN=SPTAN1;>tr|A0A0D9SF54|A0A0D9SF54_HUMAN Spectrin alpha chain, non-erythrocytic 1 OS=Homo sapiens OX=9606 GN=SPTAN1 PE=1 SV=1;>sp|Q13813|SPTN1_HUMAN Spe	5	10	10	10	7	2	8	7	8	8	7	2	8	7	8	8	7	2	8	7	8	8	6	6	6	282.28	2452	2452;2457;2472;2477;2498	0	By MS/MS	By matching	By MS/MS	By MS/MS	By MS/MS	By MS/MS	3.9	1	4.9	4.1	4.9	4.6	39223000	4552800	67530
sp|Q14118|DAG1_HUMAN;tr|C9JYS1|C9JYS1_HUMAN;tr|C9J196|C9J196_HUMAN;tr|C9JQL4|C9JQL4_HUMAN	sp|Q14118|DAG1_HUMAN	3;1;1;1	3;1;1;1	3;1;1;1	>sp|Q14118|DAG1_HUMAN Dystroglycan OS=Homo sapiens OX=9606 GN=DAG1 PE=1 SV=2	4	3	3	3	3	3	3	3	3	3	3	3	3	3	3	3	3	3	3	3	3	3	4.7	4.7	4.7	97.44	895	895;95;106;117	0	By MS/MS	By MS/MS	By MS/MS	By MS/MS	By MS/MS	By MS/MS	4.7	4.7	4.7	4.7	4.7	4.7	10052000	1186100	1501800
sp|Q14974|IMB1_HUMAN;tr|J3QR48|J3QR48_HUMAN;tr|J3KTM9|J3KTM9_HUMAN;sp|Q14974-2|IMB1_HUMAN	sp|Q14974|IMB1_HUMAN;tr|J3QR48|J3QR48_HUMAN;tr|J3KTM9|J3KTM9_HUMAN;sp|Q14974-2|IMB1_HUMAN	2;1;1;1	2;1;1;1	2;1;1;1	>sp|Q14974|IMB1_HUMAN Importin subunit beta-1 OS=Homo sapiens OX=9606 GN=KPNB1 PE=1 SV=2;>tr|J3QR48|J3QR48_HUMAN Importin subunit beta-1 (Fragment) OS=Homo sapiens OX=9606 GN=KPNB1 PE=1 SV=8;>tr|J3KTM9|J3KTM9_HUMAN Importin subunit beta-1 (Fragment) OS=Hom	4	2	2	2	1	1	2	0	2	1	1	1	2	0	2	1	1	1	2	0	2	1	2.4	2.4	2.4	97.169	876	876;148;690;731	0	By MS/MS	By matching	By matching	By matching	By MS/MS	By MS/MS	1.4	1.4	2.4	0	2.4	1.4	10656000	1229600	216810
sp|Q15058|KIF14_HUMAN	sp|Q15058|KIF14_HUMAN	1	1	1	>sp|Q15058|KIF14_HUMAN Kinesin-like protein KIF14 OS=Homo sapiens OX=9606 GN=KIF14 PE=1 SV=1	1	1	1	1	0	0	0	0	1	1	0	0	0	0	1	1	0	0	0	0	1	1	0.7	0.7	0.7	186.49	1648	1648	1	By matching	By matching	By matching	By matching	By MS/MS	By MS/MS	0	0	0	0	0.7	0.7	0	0	0
sp|Q15084-3|PDIA6_HUMAN;sp|Q15084|PDIA6_HUMAN;sp|Q15084-4|PDIA6_HUMAN;sp|Q15084-5|PDIA6_HUMAN;sp|Q15084-2|PDIA6_HUMAN	sp|Q15084-3|PDIA6_HUMAN;sp|Q15084|PDIA6_HUMAN;sp|Q15084-4|PDIA6_HUMAN;sp|Q15084-5|PDIA6_HUMAN;sp|Q15084-2|PDIA6_HUMAN	1;1;1;1;1	1;1;1;1;1	1;1;1;1;1	>sp|Q15084-3|PDIA6_HUMAN Isoform 3 of Protein disulfide-isomerase A6 OS=Homo sapiens OX=9606 GN=PDIA6;>sp|Q15084|PDIA6_HUMAN Protein disulfide-isomerase A6 OS=Homo sapiens OX=9606 GN=PDIA6 PE=1 SV=1;>sp|Q15084-4|PDIA6_HUMAN Isoform 4 of Protein disulfide-i	5	1	1	1	1	0	0	0	0	0	1	0	0	0	0	0	1	0	0	0	0	0	3.2	3.2	3.2	47.837	437	437;440;445;488;492	0.0066007	By MS/MS	By matching	By matching	By matching	By matching	By matching	3.2	0	0	0	0	0	1268200	1268200	0
sp|Q15233-2|NONO_HUMAN;sp|Q15233|NONO_HUMAN	sp|Q15233-2|NONO_HUMAN;sp|Q15233|NONO_HUMAN	1;1	1;1	1;1	>sp|Q15233-2|NONO_HUMAN Isoform 2 of Non-POU domain-containing octamer-binding protein OS=Homo sapiens OX=9606 GN=NONO;>sp|Q15233|NONO_HUMAN Non-POU domain-containing octamer-binding protein OS=Homo sapiens OX=9606 GN=NONO PE=1 SV=4	2	1	1	1	1	0	1	1	0	1	1	0	1	1	0	1	1	0	1	1	0	1	3.9	3.9	3.9	43.866	382	382;471	0.0037736	By matching	By matching	By matching	By matching	By matching	By MS/MS	3.9	0	3.9	3.9	0	3.9	0	0	0
sp|Q15262|PTPRK_HUMAN;sp|Q15262-2|PTPRK_HUMAN;sp|Q15262-3|PTPRK_HUMAN;tr|Q5TG12|Q5TG12_HUMAN;sp|Q15262-4|PTPRK_HUMAN;tr|E9PGC5|E9PGC5_HUMAN;tr|H0YDP9|H0YDP9_HUMAN;tr|E9PRW2|E9PRW2_HUMAN	sp|Q15262|PTPRK_HUMAN;sp|Q15262-2|PTPRK_HUMAN;sp|Q15262-3|PTPRK_HUMAN;tr|Q5TG12|Q5TG12_HUMAN;sp|Q15262-4|PTPRK_HUMAN;tr|E9PGC5|E9PGC5_HUMAN;tr|H0YDP9|H0YDP9_HUMAN	4;4;4;4;4;4;3;1	4;4;4;4;4;4;3;1	4;4;4;4;4;4;3;1	>sp|Q15262|PTPRK_HUMAN Receptor-type tyrosine-protein phosphatase kappa OS=Homo sapiens OX=9606 GN=PTPRK PE=1 SV=2;>sp|Q15262-2|PTPRK_HUMAN Isoform 2 of Receptor-type tyrosine-protein phosphatase kappa OS=Homo sapiens OX=9606 GN=PTPRK;>sp|Q15262-3|PTPRK_HU	8	4	4	4	4	4	4	3	4	4	4	4	4	3	4	4	4	4	4	3	4	4	4.1	4.1	4.1	162.1	1439	1439;1440;1446;1458;1462;1472;204;248	0	By matching	By MS/MS	By MS/MS	By matching	By MS/MS	By MS/MS	4.1	4.1	4.1	2.6	4.1	4.1	41262000	3231100	2605000
sp|Q15274|NADC_HUMAN;tr|C9JCJ5|C9JCJ5_HUMAN	sp|Q15274|NADC_HUMAN;tr|C9JCJ5|C9JCJ5_HUMAN	4;2	4;2	4;2	>sp|Q15274|NADC_HUMAN Nicotinate-nucleotide pyrophosphorylase [carboxylating] OS=Homo sapiens OX=9606 GN=QPRT PE=1 SV=3;>tr|C9JCJ5|C9JCJ5_HUMAN Uncharacterized protein (Fragment) OS=Homo sapiens OX=9606 PE=4 SV=10	2	4	4	4	4	3	3	3	4	2	4	3	3	3	4	2	4	3	3	3	4	2	16.8	16.8	16.8	30.845	297	297;164	0	By MS/MS	By matching	By MS/MS	By matching	By MS/MS	By MS/MS	16.8	11.4	12.8	12.8	16.8	8.8	24586000	5710300	506680
sp|Q16531-2|DDB1_HUMAN;sp|Q16531|DDB1_HUMAN	sp|Q16531-2|DDB1_HUMAN;sp|Q16531|DDB1_HUMAN	1;1	1;1	1;1	>sp|Q16531-2|DDB1_HUMAN Isoform 2 of DNA damage-binding protein 1 OS=Homo sapiens OX=9606 GN=DDB1;>sp|Q16531|DDB1_HUMAN DNA damage-binding protein 1 OS=Homo sapiens OX=9606 GN=DDB1 PE=1 SV=1	2	1	1	1	0	1	1	0	1	1	0	1	1	0	1	1	0	1	1	0	1	1	4	4	4	50.61	451	451;1140	1	By matching	By matching	By matching	By matching	By matching	By MS/MS	0	4	4	0	4	4	0	0	0
sp|Q16555-2|DPYL2_HUMAN;sp|Q16555|DPYL2_HUMAN;tr|A0A1C7CYX9|A0A1C7CYX9_HUMAN;tr|E5RFU4|E5RFU4_HUMAN	sp|Q16555-2|DPYL2_HUMAN;sp|Q16555|DPYL2_HUMAN;tr|A0A1C7CYX9|A0A1C7CYX9_HUMAN;tr|E5RFU4|E5RFU4_HUMAN	2;2;2;1	2;2;2;1	2;2;2;1	>sp|Q16555-2|DPYL2_HUMAN Isoform 2 of Dihydropyrimidinase-related protein 2 OS=Homo sapiens OX=9606 GN=DPYSL2;>sp|Q16555|DPYL2_HUMAN Dihydropyrimidinase-related protein 2 OS=Homo sapiens OX=9606 GN=DPYSL2 PE=1 SV=1;>tr|A0A1C7CYX9|A0A1C7CYX9_HUMAN Dihydropy	4	2	2	2	2	1	2	0	2	2	2	1	2	0	2	2	2	1	2	0	2	2	5.2	5.2	5.2	58.162	536	536;572;677;170	0	By MS/MS	By matching	By matching	By matching	By matching	By MS/MS	5.2	2.2	5.2	0	5.2	5.2	5270500	1458700	0
tr|C9JRR5|C9JRR5_HUMAN;sp|Q3SYG4-5|PTHB1_HUMAN;tr|F8WCG5|F8WCG5_HUMAN;sp|Q3SYG4-6|PTHB1_HUMAN;sp|Q3SYG4-2|PTHB1_HUMAN;sp|Q3SYG4-4|PTHB1_HUMAN;sp|Q3SYG4-7|PTHB1_HUMAN;sp|Q3SYG4-3|PTHB1_HUMAN;sp|Q3SYG4|PTHB1_HUMAN	tr|C9JRR5|C9JRR5_HUMAN;sp|Q3SYG4-5|PTHB1_HUMAN;tr|F8WCG5|F8WCG5_HUMAN;sp|Q3SYG4-6|PTHB1_HUMAN;sp|Q3SYG4-2|PTHB1_HUMAN;sp|Q3SYG4-4|PTHB1_HUMAN;sp|Q3SYG4-7|PTHB1_HUMAN;sp|Q3SYG4-3|PTHB1_HUMAN;sp|Q3SYG4|PTHB1_HUMAN	1;1;1;1;1;1;1;1;1	1;1;1;1;1;1;1;1;1	1;1;1;1;1;1;1;1;1	>tr|C9JRR5|C9JRR5_HUMAN Protein PTHB1 (Fragment) OS=Homo sapiens OX=9606 GN=BBS9 PE=1 SV=1;>sp|Q3SYG4-5|PTHB1_HUMAN Isoform 5 of Protein PTHB1 OS=Homo sapiens OX=9606 GN=BBS9;>tr|F8WCG5|F8WCG5_HUMAN Protein PTHB1 OS=Homo sapiens OX=9606 GN=BBS9 PE=1 SV=1;>	9	1	1	1	1	1	1	1	1	0	1	1	1	1	1	0	1	1	1	1	1	0	15.8	15.8	15.8	16.399	146	146;310;460;481;847;852;882;887;887	1	By MS/MS	By matching	By matching	By matching	By matching	By matching	15.8	15.8	15.8	15.8	15.8	0	0	0	0
sp|Q3ZCM7|TBB8_HUMAN;tr|A0A075B736|A0A075B736_HUMAN;tr|Q5SQY0|Q5SQY0_HUMAN	sp|Q3ZCM7|TBB8_HUMAN;tr|A0A075B736|A0A075B736_HUMAN;tr|Q5SQY0|Q5SQY0_HUMAN	7;6;6	1;1;1	1;1;1	>sp|Q3ZCM7|TBB8_HUMAN Tubulin beta-8 chain OS=Homo sapiens OX=9606 GN=TUBB8 PE=1 SV=2;>tr|A0A075B736|A0A075B736_HUMAN Tubulin beta chain OS=Homo sapiens OX=9606 GN=TUBB8 PE=1 SV=1;>tr|Q5SQY0|Q5SQY0_HUMAN Tubulin beta chain OS=Homo sapiens OX=9606 GN=TUBB8	3	7	1	1	5	4	7	6	6	6	0	0	1	0	1	1	0	0	1	0	1	1	20	7.2	7.2	49.775	444	444;407;410	1	By matching	By matching	By matching	By matching	By matching	By MS/MS	10.8	10.8	20	12.8	18.2	18	0	0	0
sp|Q562R1|ACTBL_HUMAN	sp|Q562R1|ACTBL_HUMAN	5	1	1	>sp|Q562R1|ACTBL_HUMAN Beta-actin-like protein 2 OS=Homo sapiens OX=9606 GN=ACTBL2 PE=1 SV=2	1	5	1	1	4	2	3	5	5	3	1	0	1	1	1	0	1	0	1	1	1	0	15.7	4.8	4.8	42.003	376	376	0.0035211	By MS/MS	By matching	By MS/MS	By MS/MS	By MS/MS	By matching	12.8	6.4	11.2	15.7	15.7	8	170390000	31178000	0
sp|Q58FF8|H90B2_HUMAN	sp|Q58FF8|H90B2_HUMAN	7	2	2	>sp|Q58FF8|H90B2_HUMAN Putative heat shock protein HSP 90-beta 2 OS=Homo sapiens OX=9606 GN=HSP90AB2P PE=1 SV=2	1	7	2	2	7	4	7	7	7	7	2	1	2	2	2	2	2	1	2	2	2	2	16.8	4.5	4.5	44.348	381	381	0	By MS/MS	By MS/MS	By MS/MS	By MS/MS	By MS/MS	By MS/MS	16.8	13.4	16.8	16.8	16.8	16.8	31338000	6536700	216900
sp|Q5TGI0|FAXC_HUMAN	sp|Q5TGI0|FAXC_HUMAN	1	1	1	>sp|Q5TGI0|FAXC_HUMAN Failed axon connections homolog OS=Homo sapiens OX=9606 GN=FAXC PE=2 SV=2	1	1	1	1	0	0	1	1	1	1	0	0	1	1	1	1	0	0	1	1	1	1	2.2	2.2	2.2	46.843	409	409	1	By matching	By matching	By matching	By MS/MS	By matching	By matching	0	0	2.2	2.2	2.2	2.2	0	0	0
tr|I3L2P2|I3L2P2_HUMAN;tr|H3BPF5|H3BPF5_HUMAN;sp|Q68CZ1-2|FTM_HUMAN;tr|H3BS47|H3BS47_HUMAN;tr|A0A087WX34|A0A087WX34_HUMAN;tr|H3BV03|H3BV03_HUMAN;sp|Q68CZ1|FTM_HUMAN	tr|I3L2P2|I3L2P2_HUMAN;tr|H3BPF5|H3BPF5_HUMAN;sp|Q68CZ1-2|FTM_HUMAN;tr|H3BS47|H3BS47_HUMAN;tr|A0A087WX34|A0A087WX34_HUMAN;tr|H3BV03|H3BV03_HUMAN;sp|Q68CZ1|FTM_HUMAN	1;1;1;1;1;1;1	1;1;1;1;1;1;1	1;1;1;1;1;1;1	>tr|I3L2P2|I3L2P2_HUMAN Protein fantom (Fragment) OS=Homo sapiens OX=9606 GN=RPGRIP1L PE=4 SV=1;>tr|H3BPF5|H3BPF5_HUMAN Protein fantom (Fragment) OS=Homo sapiens OX=9606 GN=RPGRIP1L PE=1 SV=1;>sp|Q68CZ1-2|FTM_HUMAN Isoform 2 of Protein fantom OS=Homo sapie	7	1	1	1	1	1	1	1	1	0	1	1	1	1	1	0	1	1	1	1	1	0	11.5	11.5	11.5	14.075	122	122;354;1235;1253;1269;1281;1315	1	By matching	By matching	By matching	By MS/MS	By matching	By matching	11.5	11.5	11.5	11.5	11.5	0	0	0	0
sp|Q6EMK4|VASN_HUMAN	sp|Q6EMK4|VASN_HUMAN	4	4	4	>sp|Q6EMK4|VASN_HUMAN Vasorin OS=Homo sapiens OX=9606 GN=VASN PE=1 SV=1	1	4	4	4	2	2	3	3	3	3	2	2	3	3	3	3	2	2	3	3	3	3	7.9	7.9	7.9	71.712	673	673	0	By matching	By MS/MS	By MS/MS	By MS/MS	By MS/MS	By MS/MS	4.6	4	6.1	6.1	6.1	5.5	30602000	1743600	2375100
sp|Q6NY19-2|KANK3_HUMAN;sp|Q6NY19|KANK3_HUMAN	sp|Q6NY19-2|KANK3_HUMAN;sp|Q6NY19|KANK3_HUMAN	1;1	1;1	1;1	>sp|Q6NY19-2|KANK3_HUMAN Isoform 2 of KN motif and ankyrin repeat domain-containing protein 3 OS=Homo sapiens OX=9606 GN=KANK3;>sp|Q6NY19|KANK3_HUMAN KN motif and ankyrin repeat domain-containing protein 3 OS=Homo sapiens OX=9606 GN=KANK3 PE=1 SV=1	2	1	1	1	0	1	0	0	0	0	0	1	0	0	0	0	0	1	0	0	0	0	1.8	1.8	1.8	85.892	821	821;840	1	By matching	By MS/MS	By matching	By matching	By matching	By matching	0	1.8	0	0	0	0	0	0	0
sp|Q6P988|NOTUM_HUMAN;tr|K7EIG3|K7EIG3_HUMAN;tr|C9JYG8|C9JYG8_HUMAN	sp|Q6P988|NOTUM_HUMAN;tr|K7EIG3|K7EIG3_HUMAN;tr|C9JYG8|C9JYG8_HUMAN	4;3;2	4;3;2	4;3;2	>sp|Q6P988|NOTUM_HUMAN Palmitoleoyl-protein carboxylesterase NOTUM OS=Homo sapiens OX=9606 GN=NOTUM PE=1 SV=2;>tr|K7EIG3|K7EIG3_HUMAN Palmitoleoyl-protein carboxylesterase NOTUM (Fragment) OS=Homo sapiens OX=9606 GN=NOTUM PE=1 SV=1;>tr|C9JYG8|C9JYG8_HUMAN	3	4	4	4	3	4	4	3	3	3	3	4	4	3	3	3	3	4	4	3	3	3	9.9	9.9	9.9	55.699	496	496;197;295	0	By MS/MS	By MS/MS	By MS/MS	By MS/MS	By matching	By MS/MS	5.8	9.9	9.9	5.8	5.8	5.8	19303000	1581200	3691200
tr|X5D778|X5D778_HUMAN;sp|Q6UB99|ANR11_HUMAN	tr|X5D778|X5D778_HUMAN;sp|Q6UB99|ANR11_HUMAN	1;1	1;1	1;1	>tr|X5D778|X5D778_HUMAN Ankyrin repeat domain 11 isoform A (Fragment) OS=Homo sapiens OX=9606 GN=ANKRD11 PE=2 SV=1;>sp|Q6UB99|ANR11_HUMAN Ankyrin repeat domain-containing protein 11 OS=Homo sapiens OX=9606 GN=ANKRD11 PE=1 SV=3	2	1	1	1	1	1	0	1	1	0	1	1	0	1	1	0	1	1	0	1	1	0	2.6	2.6	2.6	46.991	421	421;2663	1	By matching	By matching	By matching	By matching	By MS/MS	By matching	2.6	2.6	0	2.6	2.6	0	0	0	0
sp|Q70UQ0-4|IKIP_HUMAN	sp|Q70UQ0-4|IKIP_HUMAN	1	1	1	>sp|Q70UQ0-4|IKIP_HUMAN Isoform 4 of Inhibitor of nuclear factor kappa-B kinase-interacting protein OS=Homo sapiens OX=9606 GN=IKBIP	1	1	1	1	0	0	0	0	1	0	0	0	0	0	1	0	0	0	0	0	1	0	3.7	3.7	3.7	43.083	377	377	0.0098361	By matching	By matching	By matching	By matching	By MS/MS	By matching	0	0	0	0	3.7	0	159100000	0	0
sp|Q86SQ4-2|AGRG6_HUMAN;sp|Q86SQ4|AGRG6_HUMAN;sp|Q86SQ4-4|AGRG6_HUMAN;sp|Q86SQ4-3|AGRG6_HUMAN	sp|Q86SQ4-2|AGRG6_HUMAN;sp|Q86SQ4|AGRG6_HUMAN;sp|Q86SQ4-4|AGRG6_HUMAN;sp|Q86SQ4-3|AGRG6_HUMAN	1;1;1;1	1;1;1;1	1;1;1;1	>sp|Q86SQ4-2|AGRG6_HUMAN Isoform 2 of Adhesion G-protein coupled receptor G6 OS=Homo sapiens OX=9606 GN=ADGRG6;>sp|Q86SQ4|AGRG6_HUMAN Adhesion G-protein coupled receptor G6 OS=Homo sapiens OX=9606 GN=ADGRG6 PE=1 SV=3;>sp|Q86SQ4-4|AGRG6_HUMAN Isoform 4 of A	4	1	1	1	1	1	1	1	1	1	1	1	1	1	1	1	1	1	1	1	1	1	1.2	1.2	1.2	133.67	1193	1193;1221;1222;1250	0.003413	By matching	By MS/MS	By matching	By matching	By matching	By matching	1.2	1.2	1.2	1.2	1.2	1.2	3496800	394030	904890
sp|Q86U17|SPA11_HUMAN	sp|Q86U17|SPA11_HUMAN	3	3	3	>sp|Q86U17|SPA11_HUMAN Serpin A11 OS=Homo sapiens OX=9606 GN=SERPINA11 PE=2 SV=2	1	3	3	3	3	0	3	3	3	3	3	0	3	3	3	3	3	0	3	3	3	3	7.8	7.8	7.8	46.989	422	422	0	By MS/MS	By matching	By MS/MS	By MS/MS	By MS/MS	By MS/MS	7.8	0	7.8	7.8	7.8	7.8	30558000	4333700	0
sp|Q86WB0-3|NIPA_HUMAN;tr|C9J0I9|C9J0I9_HUMAN;sp|Q86WB0-2|NIPA_HUMAN;sp|Q86WB0|NIPA_HUMAN	sp|Q86WB0-3|NIPA_HUMAN;tr|C9J0I9|C9J0I9_HUMAN;sp|Q86WB0-2|NIPA_HUMAN;sp|Q86WB0|NIPA_HUMAN	1;1;1;1	1;1;1;1	1;1;1;1	>sp|Q86WB0-3|NIPA_HUMAN Isoform 3 of Nuclear-interacting partner of ALK OS=Homo sapiens OX=9606 GN=ZC3HC1;>tr|C9J0I9|C9J0I9_HUMAN Nuclear-interacting partner of ALK OS=Homo sapiens OX=9606 GN=ZC3HC1 PE=1 SV=1;>sp|Q86WB0-2|NIPA_HUMAN Isoform 2 of Nuclear-in	4	1	1	1	0	0	0	1	1	0	0	0	0	1	1	0	0	0	0	1	1	0	3.7	3.7	3.7	47.771	431	431;459;481;502	1	By matching	By matching	By matching	By matching	By MS/MS	By matching	0	0	0	3.7	3.7	0	0	0	0
sp|Q8N4F0|BPIB2_HUMAN	sp|Q8N4F0|BPIB2_HUMAN	4	4	4	>sp|Q8N4F0|BPIB2_HUMAN BPI fold-containing family B member 2 OS=Homo sapiens OX=9606 GN=BPIFB2 PE=1 SV=2	1	4	4	4	3	3	4	4	3	3	3	3	4	4	3	3	3	3	4	4	3	3	15.7	15.7	15.7	49.172	458	458	0	By MS/MS	By MS/MS	By matching	By MS/MS	By matching	By MS/MS	9.8	9.8	15.7	15.7	13.3	9.8	21150000	5186900	2136000
sp|Q8N9X5|TMM75_HUMAN	sp|Q8N9X5|TMM75_HUMAN	1	1	1	>sp|Q8N9X5|TMM75_HUMAN Transmembrane protein 75 OS=Homo sapiens OX=9606 GN=TMEM75 PE=2 SV=1	1	1	1	1	1	1	1	1	0	0	1	1	1	1	0	0	1	1	1	1	0	0	6.5	6.5	6.5	15.361	138	138	1	By matching	By MS/MS	By matching	By matching	By matching	By matching	6.5	6.5	6.5	6.5	0	0	0	0	0
sp|Q8N9Z9|LMTD1_HUMAN	sp|Q8N9Z9|LMTD1_HUMAN	1	1	1	>sp|Q8N9Z9|LMTD1_HUMAN Lamin tail domain-containing protein 1 OS=Homo sapiens OX=9606 GN=LMNTD1 PE=2 SV=2	1	1	1	1	0	0	0	1	0	0	0	0	0	1	0	0	0	0	0	1	0	0	2.3	2.3	2.3	43.408	388	388	1	By matching	By matching	By matching	By MS/MS	By matching	By matching	0	0	0	2.3	0	0	0	0	0
sp|Q8NBP7|PCSK9_HUMAN;sp|Q8NBP7-2|PCSK9_HUMAN	sp|Q8NBP7|PCSK9_HUMAN	16;6	16;6	16;6	>sp|Q8NBP7|PCSK9_HUMAN Proprotein convertase subtilisin/kexin type 9 OS=Homo sapiens OX=9606 GN=PCSK9 PE=1 SV=3	2	16	16	16	7	10	11	13	14	13	7	10	11	13	14	13	7	10	11	13	14	13	38.4	38.4	38.4	74.285	692	692;196	0	By MS/MS	By MS/MS	By MS/MS	By MS/MS	By MS/MS	By MS/MS	15.8	22.7	20.8	30.3	31.8	32.2	289120000	9336800	19496000
tr|F5H283|F5H283_HUMAN;sp|Q92563|TICN2_HUMAN	tr|F5H283|F5H283_HUMAN;sp|Q92563|TICN2_HUMAN	1;1	1;1	1;1	>tr|F5H283|F5H283_HUMAN Testican-2 OS=Homo sapiens OX=9606 GN=SPOCK2 PE=1 SV=2;>sp|Q92563|TICN2_HUMAN Testican-2 OS=Homo sapiens OX=9606 GN=SPOCK2 PE=1 SV=1	2	1	1	1	0	0	1	0	0	0	0	0	1	0	0	0	0	0	1	0	0	0	2.1	2.1	2.1	46.649	423	423;424	0.0066667	By matching	By matching	By MS/MS	By matching	By matching	By matching	0	0	2.1	0	0	0	0	0	0
sp|Q92688-2|AN32B_HUMAN;sp|Q92688|AN32B_HUMAN	sp|Q92688-2|AN32B_HUMAN;sp|Q92688|AN32B_HUMAN	1;1	1;1	1;1	>sp|Q92688-2|AN32B_HUMAN Isoform 2 of Acidic leucine-rich nuclear phosphoprotein 32 family member B OS=Homo sapiens OX=9606 GN=ANP32B;>sp|Q92688|AN32B_HUMAN Acidic leucine-rich nuclear phosphoprotein 32 family member B OS=Homo sapiens OX=9606 GN=ANP32B PE=	2	1	1	1	0	0	0	0	1	1	0	0	0	0	1	1	0	0	0	0	1	1	10.8	10.8	10.8	22.276	195	195;251	0.006734	By matching	By matching	By matching	By matching	By matching	By MS/MS	0	0	0	0	10.8	10.8	2110500	0	0
sp|Q92820|GGH_HUMAN	sp|Q92820|GGH_HUMAN	4	4	4	>sp|Q92820|GGH_HUMAN Gamma-glutamyl hydrolase OS=Homo sapiens OX=9606 GN=GGH PE=1 SV=2	1	4	4	4	4	4	4	3	4	2	4	4	4	3	4	2	4	4	4	3	4	2	18.9	18.9	18.9	35.964	318	318	0	By MS/MS	By MS/MS	By MS/MS	By MS/MS	By MS/MS	By matching	18.9	18.9	18.9	14.2	18.9	9.7	25715000	3757700	3008600
sp|Q9H1H9-5|KI13A_HUMAN;sp|Q96L93-5|KI16B_HUMAN;tr|A0A1B0GTU3|A0A1B0GTU3_HUMAN;sp|Q96L93-6|KI16B_HUMAN;sp|Q96L93-4|KI16B_HUMAN;sp|Q96L93|KI16B_HUMAN;sp|Q96L93-2|KI16B_HUMAN;sp|Q9H1H9-3|KI13A_HUMAN;sp|Q9H1H9-4|KI13A_HUMAN;sp|Q9H1H9-2|KI13A_HUMAN;sp|Q9H1H9|KI13A_HUMAN;tr|A0A1B0GUA8|A0A1B0GUA8_HUMAN	sp|Q9H1H9-5|KI13A_HUMAN;sp|Q96L93-5|KI16B_HUMAN;tr|A0A1B0GTU3|A0A1B0GTU3_HUMAN;sp|Q96L93-6|KI16B_HUMAN;sp|Q96L93-4|KI16B_HUMAN;sp|Q96L93|KI16B_HUMAN;sp|Q96L93-2|KI16B_HUMAN;sp|Q9H1H9-3|KI13A_HUMAN;sp|Q9H1H9-4|KI13A_HUMAN;sp|Q9H1H9-2|KI13A_HUMAN;sp|Q9H1H9|KI13A_HUMAN;tr|A0A1B0GUA8|A0A1B0GUA8_HUMAN	1;1;1;1;1;1;1;1;1;1;1;1	1;1;1;1;1;1;1;1;1;1;1;1	1;1;1;1;1;1;1;1;1;1;1;1	>sp|Q9H1H9-5|KI13A_HUMAN Isoform 5 of Kinesin-like protein KIF13A OS=Homo sapiens OX=9606 GN=KIF13A;>sp|Q96L93-5|KI16B_HUMAN Isoform 4 of Kinesin-like protein KIF16B OS=Homo sapiens OX=9606 GN=KIF16B;>tr|A0A1B0GTU3|A0A1B0GTU3_HUMAN Kinesin-like protein KIF	12	1	1	1	0	0	0	0	0	1	0	0	0	0	0	1	0	0	0	0	0	1	10	10	10	7.7258	70	70;1161;1266;1276;1287;1317;1392;1749;1757;1770;1805;1845	1	By matching	By matching	By matching	By matching	By matching	By MS/MS	0	0	0	0	0	10	0	0	0
sp|Q99436|PSB7_HUMAN	sp|Q99436|PSB7_HUMAN	1	1	1	>sp|Q99436|PSB7_HUMAN Proteasome subunit beta type-7 OS=Homo sapiens OX=9606 GN=PSMB7 PE=1 SV=1	1	1	1	1	1	0	1	0	1	1	1	0	1	0	1	1	1	0	1	0	1	1	6.9	6.9	6.9	29.965	277	277	0.0034965	By MS/MS	By matching	By matching	By matching	By MS/MS	By matching	6.9	0	6.9	0	6.9	6.9	0	0	0
sp|Q99598|TSNAX_HUMAN	sp|Q99598|TSNAX_HUMAN	1	1	1	>sp|Q99598|TSNAX_HUMAN Translin-associated protein X OS=Homo sapiens OX=9606 GN=TSNAX PE=1 SV=1	1	1	1	1	0	0	1	0	0	0	0	0	1	0	0	0	0	0	1	0	0	0	6.6	6.6	6.6	33.112	290	290	0.0066445	By matching	By matching	By MS/MS	By matching	By matching	By matching	0	0	6.6	0	0	0	0	0	0
tr|H0Y4P7|H0Y4P7_HUMAN;tr|A0A087X0A8|A0A087X0A8_HUMAN;sp|Q99715-2|COCA1_HUMAN;sp|Q99715-4|COCA1_HUMAN;tr|D6RGG3|D6RGG3_HUMAN;sp|Q99715|COCA1_HUMAN	tr|H0Y4P7|H0Y4P7_HUMAN;tr|A0A087X0A8|A0A087X0A8_HUMAN;sp|Q99715-2|COCA1_HUMAN;sp|Q99715-4|COCA1_HUMAN;tr|D6RGG3|D6RGG3_HUMAN;sp|Q99715|COCA1_HUMAN	1;1;1;1;1;1	1;1;1;1;1;1	1;1;1;1;1;1	>tr|H0Y4P7|H0Y4P7_HUMAN Collagen alpha-1(XII) chain (Fragment) OS=Homo sapiens OX=9606 GN=COL12A1 PE=1 SV=1;>tr|A0A087X0A8|A0A087X0A8_HUMAN Collagen alpha-1(XII) chain OS=Homo sapiens OX=9606 GN=COL12A1 PE=1 SV=1;>sp|Q99715-2|COCA1_HUMAN Isoform 2 of Colla	6	1	1	1	0	1	0	0	0	0	0	1	0	0	0	0	0	1	0	0	0	0	1.7	1.7	1.7	70.797	638	638;1874;1899;2987;3062;3063	1	By matching	By MS/MS	By matching	By matching	By matching	By matching	0	1.7	0	0	0	0	0	0	0
sp|Q9BQE3|TBA1C_HUMAN;tr|F5H5D3|F5H5D3_HUMAN;tr|A0A1W2PQM2|A0A1W2PQM2_HUMAN	sp|Q9BQE3|TBA1C_HUMAN;tr|F5H5D3|F5H5D3_HUMAN;tr|A0A1W2PQM2|A0A1W2PQM2_HUMAN	15;15;10	1;1;1	1;1;1	>sp|Q9BQE3|TBA1C_HUMAN Tubulin alpha-1C chain OS=Homo sapiens OX=9606 GN=TUBA1C PE=1 SV=1;>tr|F5H5D3|F5H5D3_HUMAN Tubulin alpha chain OS=Homo sapiens OX=9606 GN=TUBA1C PE=1 SV=1;>tr|A0A1W2PQM2|A0A1W2PQM2_HUMAN Tubulin alpha-1C chain OS=Homo sapiens OX=9606	3	15	1	1	14	10	15	12	15	13	1	0	1	0	1	1	1	0	1	0	1	1	42.5	3.8	3.8	49.895	449	449;519;325	0	By matching	By matching	By matching	By matching	By MS/MS	By MS/MS	42.5	32.1	42.5	35.6	42.5	37	0	0	0
sp|Q9BQT9|CSTN3_HUMAN;sp|Q9BQT9-2|CSTN3_HUMAN;tr|F5H5D7|F5H5D7_HUMAN;tr|F5H7C7|F5H7C7_HUMAN;tr|F5H5C6|F5H5C6_HUMAN;tr|F5H746|F5H746_HUMAN;tr|F5H172|F5H172_HUMAN	sp|Q9BQT9|CSTN3_HUMAN;sp|Q9BQT9-2|CSTN3_HUMAN	5;5;2;2;2;2;1	5;5;2;2;2;2;1	5;5;2;2;2;2;1	>sp|Q9BQT9|CSTN3_HUMAN Calsyntenin-3 OS=Homo sapiens OX=9606 GN=CLSTN3 PE=1 SV=1;>sp|Q9BQT9-2|CSTN3_HUMAN Isoform 2 of Calsyntenin-3 OS=Homo sapiens OX=9606 GN=CLSTN3	7	5	5	5	4	4	4	4	5	2	4	4	4	4	5	2	4	4	4	4	5	2	7.2	7.2	7.2	106.1	956	956;968;129;142;154;176;134	0	By matching	By MS/MS	By MS/MS	By matching	By MS/MS	By MS/MS	6.2	6.2	5.9	6.2	7.2	3	24459000	2745300	3320100
sp|Q9BTY2|FUCO2_HUMAN;sp|Q9BTY2-2|FUCO2_HUMAN	sp|Q9BTY2|FUCO2_HUMAN;sp|Q9BTY2-2|FUCO2_HUMAN	2;1	2;1	2;1	>sp|Q9BTY2|FUCO2_HUMAN Plasma alpha-L-fucosidase OS=Homo sapiens OX=9606 GN=FUCA2 PE=1 SV=2;>sp|Q9BTY2-2|FUCO2_HUMAN Isoform 2 of Plasma alpha-L-fucosidase OS=Homo sapiens OX=9606 GN=FUCA2	2	2	2	2	1	2	2	1	1	0	1	2	2	1	1	0	1	2	2	1	1	0	6.9	6.9	6.9	54.066	467	467;165	0	By matching	By MS/MS	By MS/MS	By matching	By matching	By matching	3.2	6.9	6.9	3.2	3.2	0	4403000	440370	1757200
sp|Q9BWD1|THIC_HUMAN;sp|Q9BWD1-2|THIC_HUMAN	sp|Q9BWD1|THIC_HUMAN;sp|Q9BWD1-2|THIC_HUMAN	6;5	6;5	6;5	>sp|Q9BWD1|THIC_HUMAN Acetyl-CoA acetyltransferase, cytosolic OS=Homo sapiens OX=9606 GN=ACAT2 PE=1 SV=2;>sp|Q9BWD1-2|THIC_HUMAN Isoform 2 of Acetyl-CoA acetyltransferase, cytosolic OS=Homo sapiens OX=9606 GN=ACAT2	2	6	6	6	5	1	4	2	6	6	5	1	4	2	6	6	5	1	4	2	6	6	32.5	32.5	32.5	41.35	397	397;426	0	By MS/MS	By matching	By matching	By matching	By MS/MS	By MS/MS	25.7	2.8	19.6	12.1	32.5	32.5	24309000	4197700	91083
sp|Q9BY67-2|CADM1_HUMAN;tr|A0A087X0T8|A0A087X0T8_HUMAN;tr|A0A087X1W8|A0A087X1W8_HUMAN;tr|A0A0A0MTJ8|A0A0A0MTJ8_HUMAN;sp|Q9BY67-5|CADM1_HUMAN;sp|Q9BY67|CADM1_HUMAN;tr|X5DQS5|X5DQS5_HUMAN;sp|Q9BY67-4|CADM1_HUMAN;sp|Q9BY67-3|CADM1_HUMAN;tr|F5H8J9|F5H8J9_HUMAN	sp|Q9BY67-2|CADM1_HUMAN;tr|A0A087X0T8|A0A087X0T8_HUMAN;tr|A0A087X1W8|A0A087X1W8_HUMAN;tr|A0A0A0MTJ8|A0A0A0MTJ8_HUMAN;sp|Q9BY67-5|CADM1_HUMAN;sp|Q9BY67|CADM1_HUMAN;tr|X5DQS5|X5DQS5_HUMAN;sp|Q9BY67-4|CADM1_HUMAN;sp|Q9BY67-3|CADM1_HUMAN;tr|F5H8J9|F5H8J9_HUMAN	2;2;2;2;2;2;2;2;2;1	2;2;2;2;2;2;2;2;2;1	2;2;2;2;2;2;2;2;2;1	>sp|Q9BY67-2|CADM1_HUMAN Isoform 2 of Cell adhesion molecule 1 OS=Homo sapiens OX=9606 GN=CADM1;>tr|A0A087X0T8|A0A087X0T8_HUMAN Cell adhesion molecule 1 OS=Homo sapiens OX=9606 GN=CADM1 PE=1 SV=1;>tr|A0A087X1W8|A0A087X1W8_HUMAN Cell adhesion molecule 1 OS=	10	2	2	2	0	0	2	2	1	0	0	0	2	2	1	0	0	0	2	2	1	0	15.3	15.3	15.3	36.915	333	333;346;412;413;414;442;443;453;471;110	0	By matching	By matching	By MS/MS	By matching	By matching	By matching	0	0	15.3	15.3	8.1	0	4424500	0	0
sp|Q9H161|ALX4_HUMAN	sp|Q9H161|ALX4_HUMAN	1	1	1	>sp|Q9H161|ALX4_HUMAN Homeobox protein aristaless-like 4 OS=Homo sapiens OX=9606 GN=ALX4 PE=1 SV=2	1	1	1	1	0	0	1	1	1	1	0	0	1	1	1	1	0	0	1	1	1	1	1.9	1.9	1.9	44.241	411	411	1	By matching	By matching	By MS/MS	By matching	By matching	By matching	0	0	1.9	1.9	1.9	1.9	0	0	0
sp|Q9HC35-2|EMAL4_HUMAN;sp|Q9HC35|EMAL4_HUMAN;tr|B5MBZ0|B5MBZ0_HUMAN	sp|Q9HC35-2|EMAL4_HUMAN;sp|Q9HC35|EMAL4_HUMAN;tr|B5MBZ0|B5MBZ0_HUMAN	1;1;1	1;1;1	1;1;1	>sp|Q9HC35-2|EMAL4_HUMAN Isoform 2 of Echinoderm microtubule-associated protein-like 4 OS=Homo sapiens OX=9606 GN=EML4;>sp|Q9HC35|EMAL4_HUMAN Echinoderm microtubule-associated protein-like 4 OS=Homo sapiens OX=9606 GN=EML4 PE=1 SV=3;>tr|B5MBZ0|B5MBZ0_HUMAN	3	1	1	1	1	0	1	1	1	1	1	0	1	1	1	1	1	0	1	1	1	1	1.3	1.3	1.3	102.44	923	923;981;992	0.0036765	By matching	By matching	By matching	By matching	By matching	By MS/MS	1.3	0	1.3	1.3	1.3	1.3	9464600	1777900	0
tr|F8WBR3|F8WBR3_HUMAN;tr|R4GMM8|R4GMM8_HUMAN;sp|Q9HCK4-2|ROBO2_HUMAN;sp|Q9HCK4|ROBO2_HUMAN;sp|Q9HCK4-3|ROBO2_HUMAN;tr|F8W703|F8W703_HUMAN;tr|A0A087WZ85|A0A087WZ85_HUMAN;tr|A0A0A0MSX4|A0A0A0MSX4_HUMAN;sp|Q9Y6N7-6|ROBO1_HUMAN;tr|A0A087WTM1|A0A087WTM1_HUMAN;sp|Q9Y6N7-5|ROBO1_HUMAN;sp|Q9Y6N7-4|ROBO1_HUMAN;sp|Q9Y6N7-3|ROBO1_HUMAN;sp|Q9Y6N7|ROBO1_HUMAN;sp|Q9Y6N7-2|ROBO1_HUMAN	tr|F8WBR3|F8WBR3_HUMAN;tr|R4GMM8|R4GMM8_HUMAN;sp|Q9HCK4-2|ROBO2_HUMAN;sp|Q9HCK4|ROBO2_HUMAN;sp|Q9HCK4-3|ROBO2_HUMAN;tr|F8W703|F8W703_HUMAN;tr|A0A087WZ85|A0A087WZ85_HUMAN;tr|A0A0A0MSX4|A0A0A0MSX4_HUMAN;sp|Q9Y6N7-6|ROBO1_HUMAN;tr|A0A087WTM1|A0A087WTM1_HUMAN;sp|Q9Y6N7-5|ROBO1_HUMAN;sp|Q9Y6N7-4|ROBO1_HUMAN;sp|Q9Y6N7-3|ROBO1_HUMAN;sp|Q9Y6N7|ROBO1_HUMAN;sp|Q9Y6N7-2|ROBO1_HUMAN	1;1;1;1;1;1;1;1;1;1;1;1;1;1;1	1;1;1;1;1;1;1;1;1;1;1;1;1;1;1	1;1;1;1;1;1;1;1;1;1;1;1;1;1;1	>tr|F8WBR3|F8WBR3_HUMAN Roundabout homolog 2 OS=Homo sapiens OX=9606 GN=ROBO2 PE=1 SV=1;>tr|R4GMM8|R4GMM8_HUMAN Roundabout homolog 2 (Fragment) OS=Homo sapiens OX=9606 GN=ROBO2 PE=1 SV=1;>sp|Q9HCK4-2|ROBO2_HUMAN Isoform 2 of Roundabout homolog 2 OS=Homo sa	15	1	1	1	0	0	1	0	1	1	0	0	1	0	1	1	0	0	1	0	1	1	2.1	2.1	2.1	62.523	564	564;1070;1185;1378;1394;1439;1525;1531;1551;1606;1606;1612;1615;1651;1655	1	By matching	By matching	By matching	By matching	By MS/MS	By matching	0	0	2.1	0	2.1	2.1	0	0	0
tr|F5H8E2|F5H8E2_HUMAN;tr|F8W679|F8W679_HUMAN;tr|M0QYN2|M0QYN2_HUMAN;tr|F5GXW4|F5GXW4_HUMAN;tr|M0R060|M0R060_HUMAN;tr|F5H5T6|F5H5T6_HUMAN;sp|Q9NX18|SDHF2_HUMAN	tr|F5H8E2|F5H8E2_HUMAN;tr|F8W679|F8W679_HUMAN;tr|M0QYN2|M0QYN2_HUMAN;tr|F5GXW4|F5GXW4_HUMAN;tr|M0R060|M0R060_HUMAN;tr|F5H5T6|F5H5T6_HUMAN;sp|Q9NX18|SDHF2_HUMAN	1;1;1;1;1;1;1	1;1;1;1;1;1;1	1;1;1;1;1;1;1	>tr|F5H8E2|F5H8E2_HUMAN Succinate dehydrogenase assembly factor 2, mitochondrial OS=Homo sapiens OX=9606 GN=SDHAF2 PE=4 SV=1;>tr|F8W679|F8W679_HUMAN Succinate dehydrogenase assembly factor 2, mitochondrial OS=Homo sapiens OX=9606 GN=SDHAF2 PE=4 SV=1;>tr|M0	7	1	1	1	0	1	1	1	1	0	0	1	1	1	1	0	0	1	1	1	1	0	20.5	20.5	20.5	10.149	88	88;129;133;133;141;163;166	1	By matching	By MS/MS	By matching	By matching	By matching	By matching	0	20.5	20.5	20.5	20.5	0	0	0	0
tr|U3KQ55|U3KQ55_HUMAN;tr|K7ES38|K7ES38_HUMAN;tr|K7EPL2|K7EPL2_HUMAN;sp|Q9UBT2|SAE2_HUMAN	tr|U3KQ55|U3KQ55_HUMAN;tr|K7ES38|K7ES38_HUMAN;tr|K7EPL2|K7EPL2_HUMAN;sp|Q9UBT2|SAE2_HUMAN	1;1;1;1	1;1;1;1	1;1;1;1	>tr|U3KQ55|U3KQ55_HUMAN SUMO-activating enzyme subunit 2 OS=Homo sapiens OX=9606 GN=UBA2 PE=1 SV=1;>tr|K7ES38|K7ES38_HUMAN SUMO-activating enzyme subunit 2 OS=Homo sapiens OX=9606 GN=UBA2 PE=1 SV=1;>tr|K7EPL2|K7EPL2_HUMAN SUMO-activating enzyme subunit 2 (	4	1	1	1	0	0	1	0	1	1	0	0	1	0	1	1	0	0	1	0	1	1	27.8	27.8	27.8	5.5314	54	54;74;262;640	0.0035461	By matching	By matching	By matching	By matching	By MS/MS	By MS/MS	0	0	27.8	0	27.8	27.8	2252900	0	0
sp|Q9UGJ0-2|AAKG2_HUMAN;tr|E9PGP6|E9PGP6_HUMAN;sp|Q9UGJ0-3|AAKG2_HUMAN;sp|Q9UGJ0|AAKG2_HUMAN	sp|Q9UGJ0-2|AAKG2_HUMAN;tr|E9PGP6|E9PGP6_HUMAN;sp|Q9UGJ0-3|AAKG2_HUMAN;sp|Q9UGJ0|AAKG2_HUMAN	1;1;1;1	1;1;1;1	1;1;1;1	>sp|Q9UGJ0-2|AAKG2_HUMAN Isoform B of 5-AMP-activated protein kinase subunit gamma-2 OS=Homo sapiens OX=9606 GN=PRKAG2;>tr|E9PGP6|E9PGP6_HUMAN 5-AMP-activated protein kinase subunit gamma-2 OS=Homo sapiens OX=9606 GN=PRKAG2 PE=1 SV=1;>sp|Q9UGJ0-3|AAKG2_H	4	1	1	1	1	0	0	0	0	0	1	0	0	0	0	0	1	0	0	0	0	0	4.9	4.9	4.9	37.508	328	328;445;525;569	1	By MS/MS	By matching	By matching	By matching	By matching	By matching	4.9	0	0	0	0	0	0	0	0
sp|Q9Y216-2|MTMR7_HUMAN;sp|Q9Y216|MTMR7_HUMAN	sp|Q9Y216-2|MTMR7_HUMAN;sp|Q9Y216|MTMR7_HUMAN	1;1	1;1	1;1	>sp|Q9Y216-2|MTMR7_HUMAN Isoform 2 of Myotubularin-related protein 7 OS=Homo sapiens OX=9606 GN=MTMR7;>sp|Q9Y216|MTMR7_HUMAN Myotubularin-related protein 7 OS=Homo sapiens OX=9606 GN=MTMR7 PE=1 SV=3	2	1	1	1	0	0	0	1	0	0	0	0	0	1	0	0	0	0	0	1	0	0	1.4	1.4	1.4	64.701	555	555;660	1	By matching	By matching	By matching	By MS/MS	By matching	By matching	0	0	0	1.4	0	0	0	0	0
sp|Q9Y617|SERC_HUMAN;sp|Q9Y617-2|SERC_HUMAN	sp|Q9Y617|SERC_HUMAN;sp|Q9Y617-2|SERC_HUMAN	3;2	3;2	3;2	>sp|Q9Y617|SERC_HUMAN Phosphoserine aminotransferase OS=Homo sapiens OX=9606 GN=PSAT1 PE=1 SV=2;>sp|Q9Y617-2|SERC_HUMAN Isoform 2 of Phosphoserine aminotransferase OS=Homo sapiens OX=9606 GN=PSAT1	2	3	3	3	2	1	2	2	2	3	2	1	2	2	2	3	2	1	2	2	2	3	9.2	9.2	9.2	40.422	370	370;324	0	By MS/MS	By matching	By matching	By matching	By MS/MS	By MS/MS	6.5	2.7	6.5	6.5	6.5	9.2	15575000	4124900	464800
tr|A0A087X1U5|A0A087X1U5_HUMAN	tr|A0A087X1U5|A0A087X1U5_HUMAN	1	1	1	>tr|A0A087X1U5|A0A087X1U5_HUMAN Ribosomal protein S6 kinase delta-1 OS=Homo sapiens OX=9606 GN=RPS6KC1 PE=1 SV=1	1	1	1	1	0	0	0	0	0	1	0	0	0	0	0	1	0	0	0	0	0	1	1.3	1.3	1.3	66.139	601	601	1	By matching	By matching	By matching	By matching	By matching	By MS/MS	0	0	0	0	0	1.3	0	0	0
tr|A0A0G2JPR0|A0A0G2JPR0_HUMAN;tr|A0A140TA49|A0A140TA49_HUMAN	tr|A0A0G2JPR0|A0A0G2JPR0_HUMAN;tr|A0A140TA49|A0A140TA49_HUMAN	71;68	2;2	0;0	>tr|A0A0G2JPR0|A0A0G2JPR0_HUMAN Complement C4-A OS=Homo sapiens OX=9606 GN=C4A PE=1 SV=1;>tr|A0A140TA49|A0A140TA49_HUMAN Complement C4-A OS=Homo sapiens OX=9606 GN=C4A PE=1 SV=1	2	71	2	0	55	54	65	61	69	58	1	2	2	1	2	1	0	0	0	0	0	0	49.1	2.2	0	192.87	1744	1744;1698	0	By MS/MS	By MS/MS	By MS/MS	By MS/MS	By MS/MS	By MS/MS	40.4	41.2	44.3	44.3	49	40.9	24168000	1785300	3034700
tr|A0A2R8Y4N8|A0A2R8Y4N8_HUMAN	tr|A0A2R8Y4N8|A0A2R8Y4N8_HUMAN	1	1	1	>tr|A0A2R8Y4N8|A0A2R8Y4N8_HUMAN HCG1642761 OS=Homo sapiens OX=9606 GN=CLEC20A PE=4 SV=1	1	1	1	1	1	0	1	1	1	1	1	0	1	1	1	1	1	0	1	1	1	1	6.3	6.3	6.3	22.878	222	222	0.0067114	By matching	By matching	By matching	By MS/MS	By MS/MS	By MS/MS	6.3	0	6.3	6.3	6.3	6.3	27303000	645550	0
tr|B4E1Z4|B4E1Z4_HUMAN;tr|E7ETN3|E7ETN3_HUMAN;sp|P00751|CFAB_HUMAN;tr|A0A0G2JH38|A0A0G2JH38_HUMAN;tr|H7C5H1|H7C5H1_HUMAN;sp|P00751-2|CFAB_HUMAN;tr|A0A0G2JHM4|A0A0G2JHM4_HUMAN;tr|A0A0G2JJ82|A0A0G2JJ82_HUMAN;tr|F2Z3N2|F2Z3N2_HUMAN;tr|Q8N6L6|Q8N6L6_HUMAN;tr|A0A0G2JI59|A0A0G2JI59_HUMAN;tr|C9JYQ5|C9JYQ5_HUMAN;tr|C9JRT3|C9JRT3_HUMAN;tr|A2ABG0|A2ABG0_HUMAN;tr|H7C526|H7C526_HUMAN;tr|F8WCJ9|F8WCJ9_HUMAN;t…	tr|B4E1Z4|B4E1Z4_HUMAN;tr|E7ETN3|E7ETN3_HUMAN;sp|P00751|CFAB_HUMAN	34;26;18;10;9;9;4;4;3;3;2;2;2;2;1;1;1;1	34;26;18;10;9;9;4;4;3;3;2;2;2;2;1;1;1;1	18;16;18;10;9;9;0;0;0;0;0;0;2;0;1;0;0;0	>tr|B4E1Z4|B4E1Z4_HUMAN cDNA FLJ55673, highly similar to Complement factor B (EC 3.4.21.47) OS=Homo sapiens OX=9606 PE=1 SV=1;>tr|E7ETN3|E7ETN3_HUMAN Uncharacterized protein OS=Homo sapiens OX=9606 PE=1 SV=1;>sp|P00751|CFAB_HUMAN Complement factor B OS=Hom	18	34	34	18	21	22	29	28	31	28	21	22	29	28	31	28	12	10	16	17	16	16	34	34	19.6	140.94	1266	1266;1115;764;589;305;621;145;169;203;328;134;136;144;158;68;104;125;139	0	By MS/MS	By MS/MS	By MS/MS	By MS/MS	By MS/MS	By MS/MS	19.1	20.5	29.1	27.6	30.6	27.6	495480000	31404000	35143000
tr|E9PRV6|E9PRV6_HUMAN;tr|E9PN80|E9PN80_HUMAN;tr|E9PKE9|E9PKE9_HUMAN;tr|C9JQY5|C9JQY5_HUMAN;tr|G3V148|G3V148_HUMAN	tr|E9PRV6|E9PRV6_HUMAN;tr|E9PN80|E9PN80_HUMAN;tr|E9PKE9|E9PKE9_HUMAN;tr|C9JQY5|C9JQY5_HUMAN;tr|G3V148|G3V148_HUMAN	1;1;1;1;1	1;1;1;1;1	1;1;1;1;1	>tr|E9PRV6|E9PRV6_HUMAN RING finger protein 121 OS=Homo sapiens OX=9606 GN=RNF121 PE=4 SV=1;>tr|E9PN80|E9PN80_HUMAN RING finger protein 121 OS=Homo sapiens OX=9606 GN=RNF121 PE=4 SV=1;>tr|E9PKE9|E9PKE9_HUMAN RING finger protein 121 OS=Homo sapiens OX=9606	5	1	1	1	0	0	1	0	0	0	0	0	1	0	0	0	0	0	1	0	0	0	22.4	22.4	22.4	5.8079	49	49;52;167;205;295	1	By matching	By matching	By MS/MS	By matching	By matching	By matching	0	0	22.4	0	0	0	0	0	0
tr|H7BZJ3|H7BZJ3_HUMAN	tr|H7BZJ3|H7BZJ3_HUMAN	4	1	1	>tr|H7BZJ3|H7BZJ3_HUMAN Protein disulfide-isomerase A3 (Fragment) OS=Homo sapiens OX=9606 GN=PDIA3 PE=1 SV=1	1	4	1	1	3	1	3	4	2	4	1	0	1	1	0	1	1	0	1	1	0	1	40.7	11.4	11.4	13.519	123	123	0	By MS/MS	By matching	By matching	By matching	By matching	By MS/MS	31.7	8.9	32.5	40.7	21.1	40.7	5104100	1747500	0
[truncated: 23 more columns]
