# Supplementary material for: Engineered EVs for Oxidative Stress Protection
Source: Pharmaceuticals (Basel). 2021 Jul 21;14(8):703. doi: 10.3390/ph14080703 (PMC8399368; doi:10.3390/ph14080703)
Supplement: Supplementary file 1 [file pharmaceuticals-14-00703-s001.zip › Supplementary Table S2.xlsx]

## Sheet: gProfiler_hsapiens_11-5-2021_13
Supplemental Table 2: Protein categorization
source	term_name	term_id	adjusted_p_value	negative_log10_of_adjusted_p_value	term_size	query_size	intersection_size	effective_domain_size	intersections
GO:MF	peptidase regulator activity	GO:0061134	3.70158e-23	22.4316	224	216	32	18676	CTSC,GAPDH,FBLN1,C5,APP,TFPI,GPC3,SERPINA7,SERPINA3,SERPIND1,C4B,FN1,SERPINF2,ITIH2,PROS1,C3,A2M,SERPINA5,SERPINA6,AHSG,SERPINA1,AMBP,SERPINF1,ITIH3,SERPINC1,AGT,PEBP1,PRDX3,PSME1,SERPINA11,APLP2,SERPINA4
GO:MF	cell adhesion molecule binding	GO:0050839	4.04993e-22	21.3926	546	216	44	18676	FASN,RAN,SPTAN1,RPSA,PSMB6,HSP90AB1,EEF1G,IDH1,LDHA,FBLN1,ENO1,ATIC,HSPA8,CLIC1,PRDX1,ALDOA,ACTN4,PKM,FGA,YWHAE,EEF2,YWHAZ,VTN,P4HB,SPTBN1,CDH2,FLNB,FGG,PAICS,HSPA5,FN1,CALR,THBS1,CPE,VASN,KRT18,ACTN1,LAMB1,FGB,CCT8,IGF2,SPP1,ICAM1,HNRNPK
GO:MF	peptidase inhibitor activity	GO:0030414	6.11105e-21	20.2139	182	216	28	18676	GAPDH,C5,APP,TFPI,GPC3,SERPINA7,SERPINA3,SERPIND1,C4B,SERPINF2,ITIH2,PROS1,C3,A2M,SERPINA5,SERPINA6,AHSG,SERPINA1,AMBP,SERPINF1,ITIH3,SERPINC1,AGT,PEBP1,PRDX3,SERPINA11,APLP2,SERPINA4
GO:MF	endopeptidase regulator activity	GO:0061135	1.53777e-20	19.8131	188	216	28	18676	GAPDH,C5,APP,TFPI,SERPINA7,SERPINA3,SERPIND1,C4B,SERPINF2,ITIH2,PROS1,C3,A2M,SERPINA5,SERPINA6,AHSG,SERPINA1,AMBP,SERPINF1,ITIH3,SERPINC1,AGT,PEBP1,PRDX3,PSME1,SERPINA11,APLP2,SERPINA4
GO:MF	endopeptidase inhibitor activity	GO:0004866	4.27759e-20	19.3688	176	216	27	18676	GAPDH,C5,APP,TFPI,SERPINA7,SERPINA3,SERPIND1,C4B,SERPINF2,ITIH2,PROS1,C3,A2M,SERPINA5,SERPINA6,AHSG,SERPINA1,AMBP,SERPINF1,ITIH3,SERPINC1,AGT,PEBP1,PRDX3,SERPINA11,APLP2,SERPINA4
GO:MF	serine-type endopeptidase inhibitor activity	GO:0004867	4.78171e-17	16.3204	98	216	20	18676	APP,TFPI,SERPINA7,SERPINA3,SERPIND1,SERPINF2,ITIH2,A2M,SERPINA5,SERPINA6,SERPINA1,AMBP,SERPINF1,ITIH3,SERPINC1,AGT,PEBP1,SERPINA11,APLP2,SERPINA4
GO:MF	enzyme inhibitor activity	GO:0004857	7.65558e-17	16.116	385	216	33	18676	GAPDH,C5,APP,TFPI,SET,GPC3,SERPINA7,SERPINA3,SERPIND1,APOA2,C4B,SERPINF2,ITIH2,PROS1,C3,A2M,SERPINA5,APOA1,SERPINA6,AHSG,SERPINA1,AMBP,SERPINF1,ITIH3,APOC3,SERPINC1,AGT,PEBP1,PRDX3,SERPINA11,APLP2,NPM1,SERPINA4
GO:MF	cadherin binding	GO:0045296	7.51032e-13	12.1243	333	216	27	18676	FASN,RAN,SPTAN1,PSMB6,HSP90AB1,EEF1G,IDH1,LDHA,ENO1,ATIC,HSPA8,CLIC1,PRDX1,ALDOA,PKM,YWHAE,EEF2,YWHAZ,SPTBN1,CDH2,FLNB,PAICS,HSPA5,VASN,KRT18,CCT8,HNRNPK
GO:MF	enzyme regulator activity	GO:0030234	2.06263e-12	11.6856	1248	216	50	18676	CTSC,ALDH1A1,XRCC5,GAPDH,HSP90AB1,HSP90AA1,FBLN1,C5,APP,TFPI,PSAP,SET,GPC3,SERPINA7,SERPINA3,APOE,SERPIND1,APOC4-APOC2,APOA2,C4B,FN1,F2,SERPINF2,ITIH2,PROS1,C3,A2M,SERPINA5,APOA1,SERPINA6,AHSG,SERPINA1,CPN2,AMBP,SERPINF1,ITIH3,APOC3,SERPINC1,APOH,AGT,PEBP1,PRDX3,PSME1,SERPINA11,APLP2,IGF2,NPM1,NUCB1,SERPINA4,GDI2
GO:MF	lipoprotein particle receptor binding	GO:0070325	2.84158e-12	11.5464	28	216	11	18676	CLTC,HSP90B1,APOB,APOE,APOA2,RELN,CLU,APOA1,APOC3,PCSK9,DKK1
GO:MF	protein-containing complex binding	GO:0044877	4.70494e-10	9.32745	1287	216	47	18676	TFRC,RPSA,XRCC5,HSP90AB1,HSPD1,NME2,HSP90AA1,KRT19,FBLN1,HSPA8,XRCC6,ACTN4,PKM,TPM3,NID1,RBP4,TUBB,YWHAE,EEF2,VTN,P4HB,SPTBN1,GSN,TTR,APOE,HSPA5,APOA2,FN1,CALR,THBS1,CLU,APOA1,AMBP,PCSK9,PLTP,CFL1,KRT8,ACTN1,LAMB1,PRKCSH,IGF2,NASP,HNRNPC,SPP1,NPM1,ICAM1,CTSB
GO:MF	identical protein binding	GO:0042802	1.03794e-09	8.98383	2067	216	61	18676	TFRC,GLUD1,FASN,AHCY,CTSC,GAPDH,PSMA7,QPRT,HSP90AB1,NME2,IDH1,HSP90AA1,LDHA,FBLN1,ENO1,ATIC,PSAT1,PRDX1,ALDOA,ACTN4,PKM,TKT,TPI1,APP,YWHAE,YWHAZ,PSAP,CDH2,FLNB,FGG,TTR,PAICS,APOE,APOA2,FN1,SERPINF2,ACTG1,PDIA3,THBS1,SDC4,APOA1,SERPINA1,AMBP,SERPINC1,ALB,APOH,PRDX3,ACTN1,CADM1,SOD1,MIF,UGDH,DPYSL2,APLP2,ALCAM,HNRNPC,NPM1,NCL,HNRNPK,LMNA,APEH
GO:MF	unfolded protein binding	GO:0051082	1.3022e-09	8.88532	112	216	15	18676	HSP90AB1,HSPD1,HSP90AA1,HSPE1,HSPA8,HSPA1B,TUBB4B,HSP90B1,HSPA5,CALR,CLU,HSPA9,CCT8,CCT3,NPM1
GO:MF	structural molecule activity	GO:0005198	2.2933e-09	8.63954	698	216	33	18676	AGRN,SPTAN1,RPSA,KRT19,FBLN1,RPLP2,TUBA1B,CLTC,TUBB4B,FGA,NID1,TUBB,VTN,SPTBN1,FGG,APOE,FN1,LAMC1,ACTG1,THBS1,MATN3,DAG1,KRT10,KRT9,KRT18,ACTN1,RPLP0,RPL12,LAMB1,FGB,LMNB1,LMNA,VCAN
GO:MF	RNA binding	GO:0003723	2.78932e-08	7.5545	1943	216	56	18676	TFRC,FASN,RAN,UBA1,RPSA,XRCC5,HSP90AB1,HSPD1,EEF1G,HSP90AA1,HSPE1,PDIA4,ENO1,PSMA1,HSPA8,TUBA1B,PRDX1,ALDOA,HSPA1B,XRCC6,ACTN4,CLTC,TUBB4B,PKM,HSP90B1,YWHAE,EEF2,YWHAZ,P4HB,SPTBN1,FLNB,C4BPA,CALR,PDIA3,RNASET2,PCSK9,PEBP1,PSMA6,MDH2,KRT18,SSB,ACTN1,ILF3,RPLP0,HSPA9,RPL12,YBX1,KPNB1,CCT3,PRKCSH,HNRNPC,NPM1,NCL,HNRNPK,GDI2,APEH
GO:MF	protein folding chaperone	GO:0044183	6.98707e-08	7.15571	35	216	9	18676	HSP90AB1,HSP90AA1,HSPA8,HSPA1B,HSPA5,CALR,HSPA9,CCT8,CCT3
GO:MF	molecular function regulator	GO:0098772	2.6722e-07	6.57313	2363	216	61	18676	CTSC,ALDH1A1,XRCC5,GPI,GAPDH,HSP90AB1,NME2,HSP90AA1,FBLN1,C5,ACTN4,APP,YWHAE,TFPI,PSAP,SET,GPC3,SERPINA7,SERPINA3,TTR,APOE,SERPIND1,APOC4-APOC2,APOA2,C4B,FN1,F2,SERPINF2,ITIH2,PROS1,C3,A2M,SERPINA5,APOA1,SERPINA6,AHSG,SERPINA1,CPN2,AMBP,SERPINF1,ITIH3,APOC3,SERPINC1,APOH,PCSK9,AGT,PEBP1,PRDX3,PSME1,ACTN1,MIF,SERPINA11,CRLF1,APLP2,IGF2,SPP1,NPM1,NUCB1,SERPINA4,GDI2,DKK1
GO:MF	enzyme binding	GO:0019899	3.32174e-07	6.47863	2074	216	56	18676	TFRC,PGAM1,CTSC,XRCC5,GPI,HSP90AB1,HSPD1,NME2,HSP90AA1,LDHA,ENO1,PSMA3,HSPA8,TUBA1B,HSPA1B,CLTC,HSP90B1,TPI1,APP,TUBB,YWHAE,EEF2,YWHAZ,PSAP,P4HB,SPTBN1,CDH2,GSN,PTPRK,APOB,HSPA5,FN1,SERPINF2,CALR,ACTG1,A2M,SERPINA5,SDC4,CLU,APOA1,SERPINA1,SERPINC1,PEBP1,PRDX3,CAP1,HSPA9,SOD1,DPYSL2,CUTA,YBX1,KPNB1,PRKCSH,NPM1,NCL,LMNB1,GDI2
GO:MF	chaperone binding	GO:0051087	1.04953e-06	5.97901	103	216	12	18676	CTSC,HSPD1,HSPE1,HSPA8,HSPA5,FN1,CALR,CLU,ALB,CP,SOD1,FGB
GO:MF	signaling receptor binding	GO:0005102	1.06231e-06	5.97375	1672	216	48	18676	GPI,HSP90AB1,FBLN1,C5,HSPA8,HSPA1B,ACTN4,CLTC,TUBB4B,FGA,HSP90B1,APP,TUBB,VTN,P4HB,FGG,TTR,APOB,APOE,APOA2,FN1,F2,CALR,THBS1,CPE,C3,LRG1,A2M,RELN,CLU,APOA1,APOC3,TF,PCSK9,AGT,ACTN1,FGL1,CADM1,IGFBP1,MIF,LAMB1,FGB,CRLF1,ALCAM,IGF2,SPP1,ICAM1,DKK1
GO:MF	low-density lipoprotein particle receptor binding	GO:0050750	2.15642e-06	5.66627	23	216	7	18676	CLTC,HSP90B1,APOB,APOE,CLU,PCSK9,DKK1
GO:MF	ubiquitin protein ligase binding	GO:0031625	4.58688e-06	5.33848	296	216	18	18676	XRCC5,GPI,HSP90AB1,HSPD1,HSP90AA1,PSMA3,HSPA8,TUBA1B,HSPA1B,TPI1,TUBB,YWHAE,YWHAZ,HSPA5,CALR,ACTG1,CLU,HSPA9
GO:MF	ubiquitin-like protein ligase binding	GO:0044389	1.14022e-05	4.94301	314	216	18	18676	XRCC5,GPI,HSP90AB1,HSPD1,HSP90AA1,PSMA3,HSPA8,TUBA1B,HSPA1B,TPI1,TUBB,YWHAE,YWHAZ,HSPA5,CALR,ACTG1,CLU,HSPA9
GO:MF	endopeptidase activity	GO:0004175	2.70253e-05	4.56823	450	216	21	18676	CTSC,PSMA7,PSMB6,CTSD,PSMA3,PSMA1,PSMA5,F10,CFI,PROC,F2,PDIA3,C2,PCSK9,HP,PSMB5,PSMA6,CTSB,PGC,PSMB4,APEH
GO:MF	extracellular matrix structural constituent	GO:0005201	4.0833e-05	4.38899	171	216	13	18676	AGRN,FBLN1,FGA,NID1,VTN,FGG,FN1,LAMC1,THBS1,MATN3,LAMB1,FGB,VCAN
GO:MF	peptidase activity	GO:0008233	5.4315e-05	4.26508	646	216	25	18676	CTSC,PSMA7,PSMB6,CTSD,PSMA3,PSMA1,GGH,PSMA5,CPN1,F10,CFI,PROC,F2,PDIA3,CPE,RELN,C2,PCSK9,HP,PSMB5,PSMA6,CTSB,PGC,PSMB4,APEH
GO:MF	integrin binding	GO:0005178	5.89271e-05	4.22968	147	216	12	18676	FBLN1,ACTN4,VTN,P4HB,FN1,CALR,THBS1,ACTN1,LAMB1,IGF2,SPP1,ICAM1
GO:MF	protein-lipid complex binding	GO:0071814	7.89289e-05	4.10276	37	216	7	18676	HSPD1,APOE,APOA2,THBS1,APOA1,PCSK9,PLTP
GO:MF	lipoprotein particle binding	GO:0071813	7.89289e-05	4.10276	37	216	7	18676	HSPD1,APOE,APOA2,THBS1,APOA1,PCSK9,PLTP
GO:MF	NAD binding	GO:0051287	8.79756e-05	4.05564	55	216	8	18676	GLUD1,AHCY,ALDH1A1,GAPDH,IDH1,LDHA,MDH1,UGDH
GO:MF	heparin binding	GO:0008201	0.000250963	3.60039	168	216	12	18676	APP,VTN,APOB,APOE,SERPIND1,FN1,F2,THBS1,SERPINA5,SERPINC1,APOH,APLP2
GO:MF	glycosaminoglycan binding	GO:0005539	0.00030677	3.51319	238	216	14	18676	AGRN,APP,VTN,APOB,APOE,SERPIND1,FN1,F2,THBS1,SERPINA5,SERPINC1,APOH,APLP2,VCAN
GO:MF	MHC class II protein complex binding	GO:0023026	0.000447451	3.34925	17	216	5	18676	HSP90AB1,HSP90AA1,HSPA8,PKM,YWHAE
GO:MF	lipid binding	GO:0008289	0.000472843	3.32528	776	216	26	18676	HSPD1,NME2,PSMA1,HSPA8,RBP4,PSAP,SPTBN1,GSN,F10,APOB,APOE,APOM,APOA2,F2,THBS1,SERPINA5,APOA1,SERPINA6,APOC3,AFP,ALB,APOH,BPIFB2,PLTP,PEBP1,PSMB4
GO:MF	high-density lipoprotein particle receptor binding	GO:0070653	0.000625366	3.20387	3	216	3	18676	APOA2,APOA1,APOC3
GO:MF	intramolecular oxidoreductase activity	GO:0016860	0.0010102	2.99559	53	216	7	18676	GPI,PDIA4,TPI1,P4HB,PDIA3,ECH1,MIF
GO:MF	sulfur compound binding	GO:1901681	0.00104615	2.98041	264	216	14	18676	AGRN,TKT,APP,VTN,APOB,APOE,SERPIND1,FN1,F2,THBS1,SERPINA5,SERPINC1,APOH,APLP2
GO:MF	double-stranded RNA binding	GO:0003725	0.00122269	2.91268	77	216	8	18676	TFRC,HSP90AB1,HSPD1,TUBA1B,CLTC,TUBB4B,ACTN1,ILF3
GO:MF	protein binding	GO:0005515	0.00126737	2.8971	14767	216	196	18676	AGRN,TFRC,GLUD1,ACAT2,FASN,RAN,UBA1,AHCY,PGAM1,CTSC,SPTAN1,RPSA,ALDH1A1,AKR1C1,HSPA4,XRCC5,GPI,ATRN,GAPDH,PSMA7,PSMB6,QPRT,HSP90AB1,HSPD1,EEF1G,CLSTN1,NME2,IDH1,CTSD,HSP90AA1,KRT19,PGK1,LDHA,FBLN1,HSPE1,TALDO1,RPLP2,PDIA4,ENO1,ATIC,PSMA3,PSAT1,C5,PSMA1,HSPA8,TUBA1B,CLIC1,PRDX1,ALDOA,HSPA1B,XRCC6,ACTN4,GGH,CLTC,TUBB4B,PKM,MDH1,FGA,HSP90B1,TPM3,NID1,PSMA5,TKT,TPI1,RBP4,APP,TUBB,YWHAE,EEF2,YWHAZ,PSA…
GO:MF	proteoglycan binding	GO:0043394	0.00133406	2.87483	36	216	6	18676	AGRN,NID1,APOE,FN1,THBS1,CTSB
GO:MF	structural constituent of cytoskeleton	GO:0005200	0.0013642	2.86512	104	216	9	18676	AGRN,SPTAN1,KRT19,TUBA1B,TUBB4B,TUBB,SPTBN1,ACTG1,KRT9
GO:MF	calcium ion binding	GO:0005509	0.00140785	2.85144	721	216	24	18676	AGRN,SPTAN1,CLSTN1,FBLN1,ACTN4,HSP90B1,NID1,TKT,CDH2,GSN,CLSTN3,F10,HSPA5,PROC,F2,CALR,THBS1,PROS1,MATN3,DAG1,ACTN1,PRKCSH,NUCB1,VCAN
GO:MF	cholesterol transfer activity	GO:0120020	0.00181648	2.74077	22	216	5	18676	APOB,APOE,APOA2,APOA1,PLTP
GO:MF	sterol transfer activity	GO:0120015	0.00229929	2.63841	23	216	5	18676	APOB,APOE,APOA2,APOA1,PLTP
GO:MF	very-low-density lipoprotein particle receptor binding	GO:0070326	0.00248006	2.60554	4	216	3	18676	APOE,RELN,PCSK9
GO:MF	antioxidant activity	GO:0016209	0.00307566	2.51206	87	216	8	18676	GSR,PRDX1,APOE,APOM,ALB,HP,PRDX3,SOD1
GO:MF	MHC protein complex binding	GO:0023023	0.00356269	2.44822	25	216	5	18676	HSP90AB1,HSP90AA1,HSPA8,PKM,YWHAE
GO:MF	peptide disulfide oxidoreductase activity	GO:0015037	0.00469883	2.32801	13	216	4	18676	GSR,PDIA4,P4HB,PDIA3
GO:MF	misfolded protein binding	GO:0051787	0.00640672	2.19336	28	216	5	18676	HSPA8,HSPA1B,HSPA5,CLU,HSPA9
GO:MF	laminin binding	GO:0043236	0.00640672	2.19336	28	216	5	18676	AGRN,RPSA,NID1,THBS1,DAG1
GO:MF	protease binding	GO:0002020	0.0101218	1.99474	133	216	9	18676	HSPD1,CLTC,PSAP,FN1,SERPINF2,A2M,SERPINA5,SERPINA1,SERPINC1
GO:MF	lyase activity	GO:0016829	0.0103872	1.9835	203	216	11	18676	FASN,XRCC5,ENO1,ALDOA,XRCC6,TPI1,PAICS,RNASET2,GOT1,ACLY,FH
GO:MF	carbohydrate derivative binding	GO:0097367	0.0105456	1.97693	2285	216	48	18676	AGRN,GLUD1,RAN,UBA1,HSPA4,XRCC5,HSP90AB1,HSPD1,NME2,HSP90AA1,PGK1,HSPE1,PSMA1,HSPA8,TUBA1B,HSPA1B,XRCC6,ACTN4,TUBB4B,PKM,HSP90B1,NID1,APP,TUBB,EEF2,PSAP,VTN,PAICS,APOB,APOE,SERPIND1,HSPA5,FN1,F2,ACTG1,THBS1,SERPINA5,SERPINC1,APOH,PEBP1,HSPA9,CCT8,CCT3,APLP2,CTSB,PSMB4,ACLY,VCAN
GO:MF	phosphatidylcholine-sterol O-acyltransferase activator activity	GO:0060228	0.0121892	1.91402	6	216	3	18676	APOE,APOA2,APOA1
GO:MF	apolipoprotein receptor binding	GO:0034190	0.0121892	1.91402	6	216	3	18676	APOA2,APOA1,PCSK9
GO:MF	disordered domain specific binding	GO:0097718	0.0171438	1.76589	34	216	5	18676	GAPDH,HSP90AB1,HSP90AA1,CLTC,FN1
GO:MF	extracellular matrix binding	GO:0050840	0.018344	1.73651	56	216	6	18676	AGRN,RPSA,NID1,THBS1,DAG1,SPP1
GO:MF	sterol transporter activity	GO:0015248	0.019814	1.70303	35	216	5	18676	APOB,APOE,APOA2,APOA1,PLTP
GO:MF	high-density lipoprotein particle binding	GO:0008035	0.0241204	1.61762	19	216	4	18676	HSPD1,APOA2,APOA1,PLTP
GO:MF	small molecule binding	GO:0036094	0.0265279	1.5763	2506	216	50	18676	GLUD1,FASN,RAN,UBA1,AHCY,ALDH1A1,HSPA4,XRCC5,GPI,GAPDH,HSP90AB1,HSPD1,NME2,IDH1,HSP90AA1,PGK1,LDHA,HSPE1,TALDO1,GSR,PSAT1,HSPA8,TUBA1B,ALDOA,HSPA1B,XRCC6,ACTN4,TUBB4B,PKM,MDH1,HSP90B1,TKT,RBP4,TUBB,EEF2,PAICS,HSPA5,APOA2,ACTG1,SERPINA5,APOA1,APOC3,ALB,GOT1,PEBP1,HSPA9,UGDH,CCT8,CCT3,ACLY
GO:MF	oxidoreductase activity, acting on a sulfur group of donors	GO:0016667	0.027219	1.56513	60	216	6	18676	PGK1,GSR,PDIA4,P4HB,PDIA3,PRDX3
GO:MF	serine-type peptidase activity	GO:0008236	0.0296767	1.52758	189	216	10	18676	CTSC,F10,CFI,PROC,F2,RELN,C2,PCSK9,HP,APEH
GO:MF	phospholipid binding	GO:0005543	0.0333421	1.47701	454	216	16	18676	HSPA8,PSAP,SPTBN1,GSN,F10,APOB,APOE,APOM,APOA2,THBS1,SERPINA5,APOA1,APOC3,APOH,PLTP,PEBP1
GO:MF	serine hydrolase activity	GO:0017171	0.0353368	1.45177	193	216	10	18676	CTSC,F10,CFI,PROC,F2,RELN,C2,PCSK9,HP,APEH
GO:MF	hydrolase activity	GO:0016787	0.0395753	1.40258	2615	216	51	18676	FASN,RAN,AHCY,PGAM1,CTSC,XRCC5,PSMA7,PSMB6,HSPD1,CTSD,HSP90AA1,ATIC,PSMA3,PSMA1,HSPA8,TUBA1B,HSPA1B,XRCC6,GGH,TUBB4B,PSMA5,TUBB,BTD,EEF2,PSAP,CPN1,PTPRK,F10,CFI,HSPA5,PROC,F2,PDIA3,CPE,RNASET2,RELN,C2,NOTUM,AZGP1,PCSK9,HP,PSMB5,PSMA6,HSPA9,DPYSL2,CCT8,FUCA2,CTSB,PGC,PSMB4,APEH
GO:MF	oxidoreductase activity, acting on the CH-OH group of donors, NAD or NADP as acceptor	GO:0016616	0.0425512	1.37109	125	216	8	18676	FASN,AKR1C1,IDH1,LDHA,MDH1,MDH2,UGDH,DHRS2
GO:MF	disulfide oxidoreductase activity	GO:0015036	0.0432341	1.36417	41	216	5	18676	PGK1,GSR,PDIA4,P4HB,PDIA3
GO:MF	heat shock protein binding	GO:0031072	0.047545	1.32289	127	216	8	18676	HSP90AB1,HSPA8,HSPA1B,HSPA5,APOA2,APOA1,HSPA9,KPNB1
GO:MF	peptidase activator activity	GO:0016504	0.0486183	1.3132	42	216	5	18676	CTSC,FBLN1,APP,FN1,PSME1
GO:MF	peptidase regulator activity	GO:0061134	3.70158e-23	22.4316	224	216	32	18676	CTSC,GAPDH,FBLN1,C5,APP,TFPI,GPC3,SERPINA7,SERPINA3,SERPIND1,C4B,FN1,SERPINF2,ITIH2,PROS1,C3,A2M,SERPINA5,SERPINA6,AHSG,SERPINA1,AMBP,SERPINF1,ITIH3,SERPINC1,AGT,PEBP1,PRDX3,PSME1,SERPINA11,APLP2,SERPINA4
GO:MF	cell adhesion molecule binding	GO:0050839	4.04993e-22	21.3926	546	216	44	18676	FASN,RAN,SPTAN1,RPSA,PSMB6,HSP90AB1,EEF1G,IDH1,LDHA,FBLN1,ENO1,ATIC,HSPA8,CLIC1,PRDX1,ALDOA,ACTN4,PKM,FGA,YWHAE,EEF2,YWHAZ,VTN,P4HB,SPTBN1,CDH2,FLNB,FGG,PAICS,HSPA5,FN1,CALR,THBS1,CPE,VASN,KRT18,ACTN1,LAMB1,FGB,CCT8,IGF2,SPP1,ICAM1,HNRNPK
GO:MF	peptidase inhibitor activity	GO:0030414	6.11105e-21	20.2139	182	216	28	18676	GAPDH,C5,APP,TFPI,GPC3,SERPINA7,SERPINA3,SERPIND1,C4B,SERPINF2,ITIH2,PROS1,C3,A2M,SERPINA5,SERPINA6,AHSG,SERPINA1,AMBP,SERPINF1,ITIH3,SERPINC1,AGT,PEBP1,PRDX3,SERPINA11,APLP2,SERPINA4
GO:MF	endopeptidase regulator activity	GO:0061135	1.53777e-20	19.8131	188	216	28	18676	GAPDH,C5,APP,TFPI,SERPINA7,SERPINA3,SERPIND1,C4B,SERPINF2,ITIH2,PROS1,C3,A2M,SERPINA5,SERPINA6,AHSG,SERPINA1,AMBP,SERPINF1,ITIH3,SERPINC1,AGT,PEBP1,PRDX3,PSME1,SERPINA11,APLP2,SERPINA4
GO:MF	endopeptidase inhibitor activity	GO:0004866	4.27759e-20	19.3688	176	216	27	18676	GAPDH,C5,APP,TFPI,SERPINA7,SERPINA3,SERPIND1,C4B,SERPINF2,ITIH2,PROS1,C3,A2M,SERPINA5,SERPINA6,AHSG,SERPINA1,AMBP,SERPINF1,ITIH3,SERPINC1,AGT,PEBP1,PRDX3,SERPINA11,APLP2,SERPINA4
GO:MF	serine-type endopeptidase inhibitor activity	GO:0004867	4.78171e-17	16.3204	98	216	20	18676	APP,TFPI,SERPINA7,SERPINA3,SERPIND1,SERPINF2,ITIH2,A2M,SERPINA5,SERPINA6,SERPINA1,AMBP,SERPINF1,ITIH3,SERPINC1,AGT,PEBP1,SERPINA11,APLP2,SERPINA4
GO:MF	enzyme inhibitor activity	GO:0004857	7.65558e-17	16.116	385	216	33	18676	GAPDH,C5,APP,TFPI,SET,GPC3,SERPINA7,SERPINA3,SERPIND1,APOA2,C4B,SERPINF2,ITIH2,PROS1,C3,A2M,SERPINA5,APOA1,SERPINA6,AHSG,SERPINA1,AMBP,SERPINF1,ITIH3,APOC3,SERPINC1,AGT,PEBP1,PRDX3,SERPINA11,APLP2,NPM1,SERPINA4
GO:MF	cadherin binding	GO:0045296	7.51032e-13	12.1243	333	216	27	18676	FASN,RAN,SPTAN1,PSMB6,HSP90AB1,EEF1G,IDH1,LDHA,ENO1,ATIC,HSPA8,CLIC1,PRDX1,ALDOA,PKM,YWHAE,EEF2,YWHAZ,SPTBN1,CDH2,FLNB,PAICS,HSPA5,VASN,KRT18,CCT8,HNRNPK
GO:MF	enzyme regulator activity	GO:0030234	2.06263e-12	11.6856	1248	216	50	18676	CTSC,ALDH1A1,XRCC5,GAPDH,HSP90AB1,HSP90AA1,FBLN1,C5,APP,TFPI,PSAP,SET,GPC3,SERPINA7,SERPINA3,APOE,SERPIND1,APOC4-APOC2,APOA2,C4B,FN1,F2,SERPINF2,ITIH2,PROS1,C3,A2M,SERPINA5,APOA1,SERPINA6,AHSG,SERPINA1,CPN2,AMBP,SERPINF1,ITIH3,APOC3,SERPINC1,APOH,AGT,PEBP1,PRDX3,PSME1,SERPINA11,APLP2,IGF2,NPM1,NUCB1,SERPINA4,GDI2
GO:MF	lipoprotein particle receptor binding	GO:0070325	2.84158e-12	11.5464	28	216	11	18676	CLTC,HSP90B1,APOB,APOE,APOA2,RELN,CLU,APOA1,APOC3,PCSK9,DKK1
GO:MF	protein-containing complex binding	GO:0044877	4.70494e-10	9.32745	1287	216	47	18676	TFRC,RPSA,XRCC5,HSP90AB1,HSPD1,NME2,HSP90AA1,KRT19,FBLN1,HSPA8,XRCC6,ACTN4,PKM,TPM3,NID1,RBP4,TUBB,YWHAE,EEF2,VTN,P4HB,SPTBN1,GSN,TTR,APOE,HSPA5,APOA2,FN1,CALR,THBS1,CLU,APOA1,AMBP,PCSK9,PLTP,CFL1,KRT8,ACTN1,LAMB1,PRKCSH,IGF2,NASP,HNRNPC,SPP1,NPM1,ICAM1,CTSB
GO:MF	identical protein binding	GO:0042802	1.03794e-09	8.98383	2067	216	61	18676	TFRC,GLUD1,FASN,AHCY,CTSC,GAPDH,PSMA7,QPRT,HSP90AB1,NME2,IDH1,HSP90AA1,LDHA,FBLN1,ENO1,ATIC,PSAT1,PRDX1,ALDOA,ACTN4,PKM,TKT,TPI1,APP,YWHAE,YWHAZ,PSAP,CDH2,FLNB,FGG,TTR,PAICS,APOE,APOA2,FN1,SERPINF2,ACTG1,PDIA3,THBS1,SDC4,APOA1,SERPINA1,AMBP,SERPINC1,ALB,APOH,PRDX3,ACTN1,CADM1,SOD1,MIF,UGDH,DPYSL2,APLP2,ALCAM,HNRNPC,NPM1,NCL,HNRNPK,LMNA,APEH
GO:MF	unfolded protein binding	GO:0051082	1.3022e-09	8.88532	112	216	15	18676	HSP90AB1,HSPD1,HSP90AA1,HSPE1,HSPA8,HSPA1B,TUBB4B,HSP90B1,HSPA5,CALR,CLU,HSPA9,CCT8,CCT3,NPM1
GO:MF	structural molecule activity	GO:0005198	2.2933e-09	8.63954	698	216	33	18676	AGRN,SPTAN1,RPSA,KRT19,FBLN1,RPLP2,TUBA1B,CLTC,TUBB4B,FGA,NID1,TUBB,VTN,SPTBN1,FGG,APOE,FN1,LAMC1,ACTG1,THBS1,MATN3,DAG1,KRT10,KRT9,KRT18,ACTN1,RPLP0,RPL12,LAMB1,FGB,LMNB1,LMNA,VCAN
GO:MF	RNA binding	GO:0003723	2.78932e-08	7.5545	1943	216	56	18676	TFRC,FASN,RAN,UBA1,RPSA,XRCC5,HSP90AB1,HSPD1,EEF1G,HSP90AA1,HSPE1,PDIA4,ENO1,PSMA1,HSPA8,TUBA1B,PRDX1,ALDOA,HSPA1B,XRCC6,ACTN4,CLTC,TUBB4B,PKM,HSP90B1,YWHAE,EEF2,YWHAZ,P4HB,SPTBN1,FLNB,C4BPA,CALR,PDIA3,RNASET2,PCSK9,PEBP1,PSMA6,MDH2,KRT18,SSB,ACTN1,ILF3,RPLP0,HSPA9,RPL12,YBX1,KPNB1,CCT3,PRKCSH,HNRNPC,NPM1,NCL,HNRNPK,GDI2,APEH
GO:MF	protein folding chaperone	GO:0044183	6.98707e-08	7.15571	35	216	9	18676	HSP90AB1,HSP90AA1,HSPA8,HSPA1B,HSPA5,CALR,HSPA9,CCT8,CCT3
GO:MF	molecular function regulator	GO:0098772	2.6722e-07	6.57313	2363	216	61	18676	CTSC,ALDH1A1,XRCC5,GPI,GAPDH,HSP90AB1,NME2,HSP90AA1,FBLN1,C5,ACTN4,APP,YWHAE,TFPI,PSAP,SET,GPC3,SERPINA7,SERPINA3,TTR,APOE,SERPIND1,APOC4-APOC2,APOA2,C4B,FN1,F2,SERPINF2,ITIH2,PROS1,C3,A2M,SERPINA5,APOA1,SERPINA6,AHSG,SERPINA1,CPN2,AMBP,SERPINF1,ITIH3,APOC3,SERPINC1,APOH,PCSK9,AGT,PEBP1,PRDX3,PSME1,ACTN1,MIF,SERPINA11,CRLF1,APLP2,IGF2,SPP1,NPM1,NUCB1,SERPINA4,GDI2,DKK1
GO:MF	enzyme binding	GO:0019899	3.32174e-07	6.47863	2074	216	56	18676	TFRC,PGAM1,CTSC,XRCC5,GPI,HSP90AB1,HSPD1,NME2,HSP90AA1,LDHA,ENO1,PSMA3,HSPA8,TUBA1B,HSPA1B,CLTC,HSP90B1,TPI1,APP,TUBB,YWHAE,EEF2,YWHAZ,PSAP,P4HB,SPTBN1,CDH2,GSN,PTPRK,APOB,HSPA5,FN1,SERPINF2,CALR,ACTG1,A2M,SERPINA5,SDC4,CLU,APOA1,SERPINA1,SERPINC1,PEBP1,PRDX3,CAP1,HSPA9,SOD1,DPYSL2,CUTA,YBX1,KPNB1,PRKCSH,NPM1,NCL,LMNB1,GDI2
GO:MF	chaperone binding	GO:0051087	1.04953e-06	5.97901	103	216	12	18676	CTSC,HSPD1,HSPE1,HSPA8,HSPA5,FN1,CALR,CLU,ALB,CP,SOD1,FGB
GO:MF	signaling receptor binding	GO:0005102	1.06231e-06	5.97375	1672	216	48	18676	GPI,HSP90AB1,FBLN1,C5,HSPA8,HSPA1B,ACTN4,CLTC,TUBB4B,FGA,HSP90B1,APP,TUBB,VTN,P4HB,FGG,TTR,APOB,APOE,APOA2,FN1,F2,CALR,THBS1,CPE,C3,LRG1,A2M,RELN,CLU,APOA1,APOC3,TF,PCSK9,AGT,ACTN1,FGL1,CADM1,IGFBP1,MIF,LAMB1,FGB,CRLF1,ALCAM,IGF2,SPP1,ICAM1,DKK1
GO:MF	low-density lipoprotein particle receptor binding	GO:0050750	2.15642e-06	5.66627	23	216	7	18676	CLTC,HSP90B1,APOB,APOE,CLU,PCSK9,DKK1
GO:MF	ubiquitin protein ligase binding	GO:0031625	4.58688e-06	5.33848	296	216	18	18676	XRCC5,GPI,HSP90AB1,HSPD1,HSP90AA1,PSMA3,HSPA8,TUBA1B,HSPA1B,TPI1,TUBB,YWHAE,YWHAZ,HSPA5,CALR,ACTG1,CLU,HSPA9
GO:MF	ubiquitin-like protein ligase binding	GO:0044389	1.14022e-05	4.94301	314	216	18	18676	XRCC5,GPI,HSP90AB1,HSPD1,HSP90AA1,PSMA3,HSPA8,TUBA1B,HSPA1B,TPI1,TUBB,YWHAE,YWHAZ,HSPA5,CALR,ACTG1,CLU,HSPA9
GO:MF	endopeptidase activity	GO:0004175	2.70253e-05	4.56823	450	216	21	18676	CTSC,PSMA7,PSMB6,CTSD,PSMA3,PSMA1,PSMA5,F10,CFI,PROC,F2,PDIA3,C2,PCSK9,HP,PSMB5,PSMA6,CTSB,PGC,PSMB4,APEH
GO:MF	extracellular matrix structural constituent	GO:0005201	4.0833e-05	4.38899	171	216	13	18676	AGRN,FBLN1,FGA,NID1,VTN,FGG,FN1,LAMC1,THBS1,MATN3,LAMB1,FGB,VCAN
GO:MF	peptidase activity	GO:0008233	5.4315e-05	4.26508	646	216	25	18676	CTSC,PSMA7,PSMB6,CTSD,PSMA3,PSMA1,GGH,PSMA5,CPN1,F10,CFI,PROC,F2,PDIA3,CPE,RELN,C2,PCSK9,HP,PSMB5,PSMA6,CTSB,PGC,PSMB4,APEH
GO:MF	integrin binding	GO:0005178	5.89271e-05	4.22968	147	216	12	18676	FBLN1,ACTN4,VTN,P4HB,FN1,CALR,THBS1,ACTN1,LAMB1,IGF2,SPP1,ICAM1
GO:MF	protein-lipid complex binding	GO:0071814	7.89289e-05	4.10276	37	216	7	18676	HSPD1,APOE,APOA2,THBS1,APOA1,PCSK9,PLTP
GO:MF	lipoprotein particle binding	GO:0071813	7.89289e-05	4.10276	37	216	7	18676	HSPD1,APOE,APOA2,THBS1,APOA1,PCSK9,PLTP
GO:MF	NAD binding	GO:0051287	8.79756e-05	4.05564	55	216	8	18676	GLUD1,AHCY,ALDH1A1,GAPDH,IDH1,LDHA,MDH1,UGDH
GO:MF	heparin binding	GO:0008201	0.000250963	3.60039	168	216	12	18676	APP,VTN,APOB,APOE,SERPIND1,FN1,F2,THBS1,SERPINA5,SERPINC1,APOH,APLP2
GO:MF	glycosaminoglycan binding	GO:0005539	0.00030677	3.51319	238	216	14	18676	AGRN,APP,VTN,APOB,APOE,SERPIND1,FN1,F2,THBS1,SERPINA5,SERPINC1,APOH,APLP2,VCAN
GO:MF	MHC class II protein complex binding	GO:0023026	0.000447451	3.34925	17	216	5	18676	HSP90AB1,HSP90AA1,HSPA8,PKM,YWHAE
GO:MF	lipid binding	GO:0008289	0.000472843	3.32528	776	216	26	18676	HSPD1,NME2,PSMA1,HSPA8,RBP4,PSAP,SPTBN1,GSN,F10,APOB,APOE,APOM,APOA2,F2,THBS1,SERPINA5,APOA1,SERPINA6,APOC3,AFP,ALB,APOH,BPIFB2,PLTP,PEBP1,PSMB4
GO:MF	high-density lipoprotein particle receptor binding	GO:0070653	0.000625366	3.20387	3	216	3	18676	APOA2,APOA1,APOC3
GO:MF	intramolecular oxidoreductase activity	GO:0016860	0.0010102	2.99559	53	216	7	18676	GPI,PDIA4,TPI1,P4HB,PDIA3,ECH1,MIF
GO:MF	sulfur compound binding	GO:1901681	0.00104615	2.98041	264	216	14	18676	AGRN,TKT,APP,VTN,APOB,APOE,SERPIND1,FN1,F2,THBS1,SERPINA5,SERPINC1,APOH,APLP2
GO:MF	double-stranded RNA binding	GO:0003725	0.00122269	2.91268	77	216	8	18676	TFRC,HSP90AB1,HSPD1,TUBA1B,CLTC,TUBB4B,ACTN1,ILF3
GO:MF	protein binding	GO:0005515	0.00126737	2.8971	14767	216	196	18676	AGRN,TFRC,GLUD1,ACAT2,FASN,RAN,UBA1,AHCY,PGAM1,CTSC,SPTAN1,RPSA,ALDH1A1,AKR1C1,HSPA4,XRCC5,GPI,ATRN,GAPDH,PSMA7,PSMB6,QPRT,HSP90AB1,HSPD1,EEF1G,CLSTN1,NME2,IDH1,CTSD,HSP90AA1,KRT19,PGK1,LDHA,FBLN1,HSPE1,TALDO1,RPLP2,PDIA4,ENO1,ATIC,PSMA3,PSAT1,C5,PSMA1,HSPA8,TUBA1B,CLIC1,PRDX1,ALDOA,HSPA1B,XRCC6,ACTN4,GGH,CLTC,TUBB4B,PKM,MDH1,FGA,HSP90B1,TPM3,NID1,PSMA5,TKT,TPI1,RBP4,APP,TUBB,YWHAE,EEF2,YWHAZ,PSA…
GO:MF	proteoglycan binding	GO:0043394	0.00133406	2.87483	36	216	6	18676	AGRN,NID1,APOE,FN1,THBS1,CTSB
GO:MF	structural constituent of cytoskeleton	GO:0005200	0.0013642	2.86512	104	216	9	18676	AGRN,SPTAN1,KRT19,TUBA1B,TUBB4B,TUBB,SPTBN1,ACTG1,KRT9
GO:MF	calcium ion binding	GO:0005509	0.00140785	2.85144	721	216	24	18676	AGRN,SPTAN1,CLSTN1,FBLN1,ACTN4,HSP90B1,NID1,TKT,CDH2,GSN,CLSTN3,F10,HSPA5,PROC,F2,CALR,THBS1,PROS1,MATN3,DAG1,ACTN1,PRKCSH,NUCB1,VCAN
GO:MF	cholesterol transfer activity	GO:0120020	0.00181648	2.74077	22	216	5	18676	APOB,APOE,APOA2,APOA1,PLTP
GO:MF	sterol transfer activity	GO:0120015	0.00229929	2.63841	23	216	5	18676	APOB,APOE,APOA2,APOA1,PLTP
GO:MF	very-low-density lipoprotein particle receptor binding	GO:0070326	0.00248006	2.60554	4	216	3	18676	APOE,RELN,PCSK9
GO:MF	antioxidant activity	GO:0016209	0.00307566	2.51206	87	216	8	18676	GSR,PRDX1,APOE,APOM,ALB,HP,PRDX3,SOD1
GO:MF	MHC protein complex binding	GO:0023023	0.00356269	2.44822	25	216	5	18676	HSP90AB1,HSP90AA1,HSPA8,PKM,YWHAE
GO:MF	peptide disulfide oxidoreductase activity	GO:0015037	0.00469883	2.32801	13	216	4	18676	GSR,PDIA4,P4HB,PDIA3
GO:MF	misfolded protein binding	GO:0051787	0.00640672	2.19336	28	216	5	18676	HSPA8,HSPA1B,HSPA5,CLU,HSPA9
GO:MF	laminin binding	GO:0043236	0.00640672	2.19336	28	216	5	18676	AGRN,RPSA,NID1,THBS1,DAG1
GO:MF	protease binding	GO:0002020	0.0101218	1.99474	133	216	9	18676	HSPD1,CLTC,PSAP,FN1,SERPINF2,A2M,SERPINA5,SERPINA1,SERPINC1
GO:MF	lyase activity	GO:0016829	0.0103872	1.9835	203	216	11	18676	FASN,XRCC5,ENO1,ALDOA,XRCC6,TPI1,PAICS,RNASET2,GOT1,ACLY,FH
GO:MF	carbohydrate derivative binding	GO:0097367	0.0105456	1.97693	2285	216	48	18676	AGRN,GLUD1,RAN,UBA1,HSPA4,XRCC5,HSP90AB1,HSPD1,NME2,HSP90AA1,PGK1,HSPE1,PSMA1,HSPA8,TUBA1B,HSPA1B,XRCC6,ACTN4,TUBB4B,PKM,HSP90B1,NID1,APP,TUBB,EEF2,PSAP,VTN,PAICS,APOB,APOE,SERPIND1,HSPA5,FN1,F2,ACTG1,THBS1,SERPINA5,SERPINC1,APOH,PEBP1,HSPA9,CCT8,CCT3,APLP2,CTSB,PSMB4,ACLY,VCAN
GO:MF	phosphatidylcholine-sterol O-acyltransferase activator activity	GO:0060228	0.0121892	1.91402	6	216	3	18676	APOE,APOA2,APOA1
GO:MF	apolipoprotein receptor binding	GO:0034190	0.0121892	1.91402	6	216	3	18676	APOA2,APOA1,PCSK9
GO:MF	disordered domain specific binding	GO:0097718	0.0171438	1.76589	34	216	5	18676	GAPDH,HSP90AB1,HSP90AA1,CLTC,FN1
GO:MF	extracellular matrix binding	GO:0050840	0.018344	1.73651	56	216	6	18676	AGRN,RPSA,NID1,THBS1,DAG1,SPP1
GO:MF	sterol transporter activity	GO:0015248	0.019814	1.70303	35	216	5	18676	APOB,APOE,APOA2,APOA1,PLTP
GO:MF	high-density lipoprotein particle binding	GO:0008035	0.0241204	1.61762	19	216	4	18676	HSPD1,APOA2,APOA1,PLTP
GO:MF	small molecule binding	GO:0036094	0.0265279	1.5763	2506	216	50	18676	GLUD1,FASN,RAN,UBA1,AHCY,ALDH1A1,HSPA4,XRCC5,GPI,GAPDH,HSP90AB1,HSPD1,NME2,IDH1,HSP90AA1,PGK1,LDHA,HSPE1,TALDO1,GSR,PSAT1,HSPA8,TUBA1B,ALDOA,HSPA1B,XRCC6,ACTN4,TUBB4B,PKM,MDH1,HSP90B1,TKT,RBP4,TUBB,EEF2,PAICS,HSPA5,APOA2,ACTG1,SERPINA5,APOA1,APOC3,ALB,GOT1,PEBP1,HSPA9,UGDH,CCT8,CCT3,ACLY
GO:MF	oxidoreductase activity, acting on a sulfur group of donors	GO:0016667	0.027219	1.56513	60	216	6	18676	PGK1,GSR,PDIA4,P4HB,PDIA3,PRDX3
GO:MF	serine-type peptidase activity	GO:0008236	0.0296767	1.52758	189	216	10	18676	CTSC,F10,CFI,PROC,F2,RELN,C2,PCSK9,HP,APEH
GO:MF	phospholipid binding	GO:0005543	0.0333421	1.47701	454	216	16	18676	HSPA8,PSAP,SPTBN1,GSN,F10,APOB,APOE,APOM,APOA2,THBS1,SERPINA5,APOA1,APOC3,APOH,PLTP,PEBP1
GO:MF	serine hydrolase activity	GO:0017171	0.0353368	1.45177	193	216	10	18676	CTSC,F10,CFI,PROC,F2,RELN,C2,PCSK9,HP,APEH
GO:MF	hydrolase activity	GO:0016787	0.0395753	1.40258	2615	216	51	18676	FASN,RAN,AHCY,PGAM1,CTSC,XRCC5,PSMA7,PSMB6,HSPD1,CTSD,HSP90AA1,ATIC,PSMA3,PSMA1,HSPA8,TUBA1B,HSPA1B,XRCC6,GGH,TUBB4B,PSMA5,TUBB,BTD,EEF2,PSAP,CPN1,PTPRK,F10,CFI,HSPA5,PROC,F2,PDIA3,CPE,RNASET2,RELN,C2,NOTUM,AZGP1,PCSK9,HP,PSMB5,PSMA6,HSPA9,DPYSL2,CCT8,FUCA2,CTSB,PGC,PSMB4,APEH
GO:MF	oxidoreductase activity, acting on the CH-OH group of donors, NAD or NADP as acceptor	GO:0016616	0.0425512	1.37109	125	216	8	18676	FASN,AKR1C1,IDH1,LDHA,MDH1,MDH2,UGDH,DHRS2
GO:MF	disulfide oxidoreductase activity	GO:0015036	0.0432341	1.36417	41	216	5	18676	PGK1,GSR,PDIA4,P4HB,PDIA3
GO:MF	heat shock protein binding	GO:0031072	0.047545	1.32289	127	216	8	18676	HSP90AB1,HSPA8,HSPA1B,HSPA5,APOA2,APOA1,HSPA9,KPNB1
GO:MF	peptidase activator activity	GO:0016504	0.0486183	1.3132	42	216	5	18676	CTSC,FBLN1,APP,FN1,PSME1
GO:BP	regulated exocytosis	GO:0045055	1.75123e-33	32.7567	785	217	65	18117	PGAM1,CTSC,SPTAN1,XRCC5,GPI,HSP90AB1,NME2,IDH1,CTSD,HSP90AA1,HSPA8,ALDOA,HSPA1B,XRCC6,ACTN4,GGH,TUBB4B,PKM,FGA,PSMA5,APP,TUBB,EEF2,PSAP,GSN,SERPINA3,FGG,TTR,FN1,SERPINF2,THBS1,PROS1,C3,LRG1,A2M,LGALS3BP,RNASET2,CLU,APOA1,AHSG,SERPINA1,ITIH3,ORM2,ALB,ORM1,APOH,TF,A1BG,F5,HP,CAP1,ACTN1,SOD1,MIF,FGB,CCT8,KPNB1,APLP2,IGF2,FUCA2,CTSB,SERPINA4,GDI2,ACLY,APEH
GO:BP	exocytosis	GO:0006887	9.8069e-31	30.0085	904	217	66	18117	PGAM1,CTSC,SPTAN1,XRCC5,GPI,HSP90AB1,NME2,IDH1,CTSD,HSP90AA1,HSPA8,ALDOA,HSPA1B,XRCC6,ACTN4,GGH,TUBB4B,PKM,FGA,PSMA5,APP,TUBB,EEF2,PSAP,GSN,SERPINA3,FGG,TTR,FN1,SERPINF2,THBS1,PROS1,C3,LRG1,A2M,LGALS3BP,SDC4,RNASET2,CLU,APOA1,AHSG,SERPINA1,ITIH3,ORM2,ALB,ORM1,APOH,TF,A1BG,F5,HP,CAP1,ACTN1,SOD1,MIF,FGB,CCT8,KPNB1,APLP2,IGF2,FUCA2,CTSB,SERPINA4,GDI2,ACLY,APEH
GO:BP	post-translational protein modification	GO:0043687	1.28637e-30	29.8906	362	217	46	18117	PSMA7,PSMB6,PSMA3,PSMA1,FGA,HSP90B1,PSMA5,APP,P4HB,GPC3,CDH2,FGG,APOB,APOE,SERPIND1,APOA2,FN1,PROC,LAMC1,ITIH2,C3,APOA1,AHSG,MATN3,SERPINA1,AFP,NOTUM,SERPINC1,ALB,TF,PCSK9,F5,BPIFB2,CP,PSME1,PSMB5,PSMA6,IGFBP1,LAMB1,APLP2,PRKCSH,SPP1,FUCA2,NUCB1,PSMB4,VCAN
GO:BP	platelet degranulation	GO:0002576	6.7992e-29	28.1675	126	217	31	18117	ALDOA,ACTN4,FGA,APP,PSAP,SERPINA3,FGG,FN1,SERPINF2,THBS1,PROS1,A2M,LGALS3BP,CLU,APOA1,AHSG,SERPINA1,ITIH3,ORM2,ALB,ORM1,APOH,TF,A1BG,F5,ACTN1,SOD1,FGB,APLP2,IGF2,SERPINA4
GO:BP	vesicle-mediated transport	GO:0016192	3.77967e-27	26.4225	2180	217	93	18117	TFRC,PGAM1,CTSC,SPTAN1,XRCC5,GPI,HSP90AB1,CLSTN1,NME2,IDH1,CTSD,HSP90AA1,HSPA8,ALDOA,HSPA1B,XRCC6,ACTN4,GGH,CLTC,TUBB4B,PKM,FGA,HSP90B1,PSMA5,APP,TUBB,EEF2,PSAP,VTN,GPC3,SPTBN1,CDH2,GSN,F10,SERPINA3,FGG,TTR,APOB,APOE,C4BPA,CFI,APOA2,C4B,FN1,PROC,F2,SERPINF2,CALR,ACTG1,THBS1,PROS1,C3,LRG1,A2M,LGALS3BP,SDC4,RNASET2,CLU,APOA1,C2,AHSG,SERPINA1,AMBP,ITIH3,APOC3,ORM2,ALB,ORM1,APOH,TF,PCSK9,A1BG,F5,HP,K…
GO:BP	secretion by cell	GO:0032940	7.96787e-26	25.0987	1364	217	73	18117	GLUD1,PGAM1,CTSC,SPTAN1,XRCC5,GPI,HSP90AB1,NME2,IDH1,CTSD,HSP90AA1,PDIA4,HSPA8,ALDOA,HSPA1B,XRCC6,ACTN4,GGH,TUBB4B,PKM,FGA,PSMA5,RBP4,APP,TUBB,EEF2,PSAP,GSN,SERPINA3,FGG,TTR,APOE,FN1,SERPINF2,THBS1,PROS1,C3,LRG1,A2M,LGALS3BP,SDC4,RNASET2,CLU,APOA1,AHSG,SERPINA1,ITIH3,ORM2,ALB,ORM1,APOH,TF,AGT,A1BG,F5,HP,CAP1,ACTN1,SOD1,MIF,DPYSL2,FGB,CCT8,KPNB1,APLP2,IGF2,SPP1,FUCA2,CTSB,SERPINA4,GDI2,ACLY,APEH
GO:BP	export from cell	GO:0140352	1.45611e-25	24.8368	1418	217	74	18117	GLUD1,PGAM1,CTSC,SPTAN1,XRCC5,GPI,HSP90AB1,NME2,IDH1,CTSD,HSP90AA1,PDIA4,HSPA8,ALDOA,HSPA1B,XRCC6,ACTN4,GGH,TUBB4B,PKM,FGA,PSMA5,RBP4,APP,TUBB,YWHAE,EEF2,PSAP,GSN,SERPINA3,FGG,TTR,APOE,FN1,SERPINF2,THBS1,PROS1,C3,LRG1,A2M,LGALS3BP,SDC4,RNASET2,CLU,APOA1,AHSG,SERPINA1,ITIH3,ORM2,ALB,ORM1,APOH,TF,AGT,A1BG,F5,HP,CAP1,ACTN1,SOD1,MIF,DPYSL2,FGB,CCT8,KPNB1,APLP2,IGF2,SPP1,FUCA2,CTSB,SERPINA4,GDI2,ACLY,…
GO:BP	secretion	GO:0046903	5.41015e-24	23.2668	1501	217	74	18117	GLUD1,PGAM1,CTSC,SPTAN1,XRCC5,GPI,HSP90AB1,NME2,IDH1,CTSD,HSP90AA1,PDIA4,HSPA8,ALDOA,HSPA1B,XRCC6,ACTN4,GGH,TUBB4B,PKM,FGA,PSMA5,RBP4,APP,TUBB,EEF2,PSAP,GSN,SERPINA3,FGG,TTR,APOE,FN1,SERPINF2,THBS1,PROS1,C3,LRG1,A2M,LGALS3BP,SDC4,RNASET2,CLU,APOA1,AHSG,SERPINA1,ITIH3,ORM2,SERPINC1,ALB,ORM1,APOH,TF,AGT,A1BG,F5,HP,CAP1,ACTN1,SOD1,MIF,DPYSL2,FGB,CCT8,KPNB1,APLP2,IGF2,SPP1,FUCA2,CTSB,SERPINA4,GDI2,AC…
GO:BP	transport	GO:0006810	6.44076e-24	23.1911	5224	217	139	18117	TFRC,GLUD1,RAN,PGAM1,CTSC,SPTAN1,RPSA,AKR1C1,HSPA4,XRCC5,GPI,PSMA7,PSMB6,HSP90AB1,HSPD1,CLSTN1,NME2,IDH1,CTSD,HSP90AA1,RPLP2,PDIA4,PSMA3,PSMA1,HSPA8,TUBA1B,CLIC1,ALDOA,HSPA1B,XRCC6,ACTN4,GGH,CLTC,TUBB4B,PKM,FGA,HSP90B1,PSMA5,RBP4,APP,TUBB,YWHAE,EEF2,YWHAZ,PSAP,VTN,GPC3,SERPINA7,SPTBN1,CDH2,GSN,F10,SERPINA3,FGG,TTR,APOB,APOE,APOM,C4BPA,CFI,APOC4-APOC2,HSPA5,APOA2,C4B,FN1,PROC,F2,SERPINF2,CALR,ACTG…
GO:BP	establishment of localization	GO:0051234	3.0899e-23	22.5101	5372	217	140	18117	TFRC,GLUD1,RAN,PGAM1,CTSC,SPTAN1,RPSA,AKR1C1,HSPA4,XRCC5,GPI,PSMA7,PSMB6,HSP90AB1,HSPD1,CLSTN1,NME2,IDH1,CTSD,HSP90AA1,RPLP2,PDIA4,PSMA3,PSMA1,HSPA8,TUBA1B,CLIC1,ALDOA,HSPA1B,XRCC6,ACTN4,GGH,CLTC,TUBB4B,PKM,FGA,HSP90B1,PSMA5,RBP4,APP,TUBB,YWHAE,EEF2,YWHAZ,PSAP,VTN,GPC3,SERPINA7,SPTBN1,CDH2,GSN,F10,SERPINA3,FGG,TTR,APOB,APOE,APOM,C4BPA,CFI,APOC4-APOC2,HSPA5,APOA2,C4B,FN1,PROC,F2,SERPINF2,CALR,ACTG…
GO:BP	organonitrogen compound metabolic process	GO:1901564	2.30356e-22	21.6376	6792	217	157	18117	AGRN,TFRC,GLUD1,FASN,RAN,UBA1,AHCY,PGAM1,CTSC,RPSA,XRCC5,GPI,GAPDH,PSMA7,PSMB6,QPRT,HSP90AB1,HSPD1,EEF1G,NME2,IDH1,CTSD,HSP90AA1,PGK1,LDHA,FBLN1,HSPE1,RPLP2,GSR,PDIA4,ENO1,ATIC,PSMA3,PSAT1,C5,PSMA1,HSPA8,CLIC1,ALDOA,HSPA1B,XRCC6,GGH,CLTC,PKM,FGA,HSP90B1,PSMA5,TPI1,APP,YWHAE,BTD,TFPI,EEF2,YWHAZ,PSAP,VTN,CPN1,SET,P4HB,GPC3,SERPINA7,SPTBN1,CDH2,GSN,PTPRK,F10,SERPINA3,FGG,TTR,PAICS,APOB,APOE,APOM,C4B…
GO:BP	neutrophil mediated immunity	GO:0002446	1.80068e-21	20.7446	497	217	43	18117	PGAM1,CTSC,SPTAN1,XRCC5,GPI,HSP90AB1,NME2,IDH1,CTSD,HSP90AA1,HSPA8,ALDOA,HSPA1B,XRCC6,GGH,TUBB4B,PKM,PSMA5,TUBB,EEF2,PSAP,GSN,SERPINA3,TTR,F2,C3,LRG1,RNASET2,AHSG,SERPINA1,ORM2,ORM1,A1BG,HP,CAP1,MIF,CCT8,KPNB1,FUCA2,CTSB,GDI2,ACLY,APEH
GO:BP	establishment of localization in cell	GO:0051649	2.22752e-21	20.6522	2813	217	97	18117	RAN,PGAM1,CTSC,SPTAN1,RPSA,HSPA4,XRCC5,GPI,HSP90AB1,HSPD1,NME2,IDH1,CTSD,HSP90AA1,RPLP2,HSPA8,TUBA1B,ALDOA,HSPA1B,XRCC6,ACTN4,GGH,CLTC,TUBB4B,PKM,FGA,HSP90B1,PSMA5,APP,TUBB,YWHAE,EEF2,YWHAZ,PSAP,SPTBN1,CDH2,GSN,F10,SERPINA3,FGG,TTR,APOE,HSPA5,FN1,PROC,F2,SERPINF2,CALR,ACTG1,THBS1,PROS1,C3,LRG1,A2M,LGALS3BP,RNASET2,CLU,APOA1,AHSG,SERPINA1,ITIH3,ORM2,ALB,ORM1,APOH,TF,PCSK9,AGT,A1BG,F5,HP,CFL1,CAP1,…
GO:BP	immune effector process	GO:0002252	2.48517e-21	20.6046	1309	217	66	18117	TFRC,PGAM1,CTSC,SPTAN1,XRCC5,GPI,HSP90AB1,HSPD1,NME2,IDH1,CTSD,HSP90AA1,C5,HSPA8,PRDX1,ALDOA,HSPA1B,XRCC6,GGH,TUBB4B,PKM,PSMA5,RBP4,APP,TUBB,EEF2,PSAP,VTN,CPN1,GSN,SERPINA3,TTR,C4BPA,CFI,APOA2,C4B,F2,ACTG1,PROS1,C3,LRG1,A2M,RNASET2,CLU,APOA1,C2,AHSG,SERPINA1,CPN2,ORM2,ORM1,A1BG,HP,CAP1,ILF3,CADM1,MIF,CCT8,KPNB1,FUCA2,ICAM1,CTSB,PGC,GDI2,ACLY,APEH
GO:BP	neutrophil degranulation	GO:0043312	5.13516e-21	20.2894	482	217	42	18117	PGAM1,CTSC,SPTAN1,XRCC5,GPI,HSP90AB1,NME2,IDH1,CTSD,HSP90AA1,HSPA8,ALDOA,HSPA1B,XRCC6,GGH,TUBB4B,PKM,PSMA5,TUBB,EEF2,PSAP,GSN,SERPINA3,TTR,C3,LRG1,RNASET2,AHSG,SERPINA1,ORM2,ORM1,A1BG,HP,CAP1,MIF,CCT8,KPNB1,FUCA2,CTSB,GDI2,ACLY,APEH
GO:BP	neutrophil activation involved in immune response	GO:0002283	6.54899e-21	20.1838	485	217	42	18117	PGAM1,CTSC,SPTAN1,XRCC5,GPI,HSP90AB1,NME2,IDH1,CTSD,HSP90AA1,HSPA8,ALDOA,HSPA1B,XRCC6,GGH,TUBB4B,PKM,PSMA5,TUBB,EEF2,PSAP,GSN,SERPINA3,TTR,C3,LRG1,RNASET2,AHSG,SERPINA1,ORM2,ORM1,A1BG,HP,CAP1,MIF,CCT8,KPNB1,FUCA2,CTSB,GDI2,ACLY,APEH
GO:BP	proteolysis	GO:0006508	1.06711e-20	19.9718	1836	217	77	18117	UBA1,CTSC,GPI,GAPDH,PSMA7,PSMB6,HSP90AB1,HSPD1,CTSD,PGK1,FBLN1,HSPE1,ENO1,PSMA3,C5,PSMA1,HSPA1B,GGH,FGA,HSP90B1,PSMA5,APP,YWHAE,TFPI,VTN,CPN1,GPC3,SERPINA7,GSN,F10,SERPINA3,FGG,APOE,CFI,SERPIND1,HSPA5,C4B,FN1,PROC,F2,SERPINF2,PDIA3,ITIH2,THBS1,PROS1,CPE,C3,A2M,SERPINA5,RELN,CLU,C2,SERPINA6,AHSG,DAG1,SERPINA1,AMBP,SERPINF1,ITIH3,SERPINC1,APOH,PCSK9,AGT,HP,PEBP1,PRDX3,PSME1,PSMB5,PSMA6,FGB,SERPINA1…
GO:BP	leukocyte mediated immunity	GO:0002443	1.13669e-20	19.9444	877	217	54	18117	TFRC,PGAM1,CTSC,SPTAN1,XRCC5,GPI,HSP90AB1,HSPD1,NME2,IDH1,CTSD,HSP90AA1,C5,HSPA8,PRDX1,ALDOA,HSPA1B,XRCC6,GGH,TUBB4B,PKM,PSMA5,TUBB,EEF2,PSAP,GSN,SERPINA3,TTR,C4BPA,CFI,C4B,F2,C3,LRG1,RNASET2,CLU,C2,AHSG,SERPINA1,ORM2,ORM1,A1BG,HP,CAP1,CADM1,MIF,CCT8,KPNB1,FUCA2,ICAM1,CTSB,GDI2,ACLY,APEH
GO:BP	neutrophil activation	GO:0042119	1.84142e-20	19.7348	498	217	42	18117	PGAM1,CTSC,SPTAN1,XRCC5,GPI,HSP90AB1,NME2,IDH1,CTSD,HSP90AA1,HSPA8,ALDOA,HSPA1B,XRCC6,GGH,TUBB4B,PKM,PSMA5,TUBB,EEF2,PSAP,GSN,SERPINA3,TTR,C3,LRG1,RNASET2,AHSG,SERPINA1,ORM2,ORM1,A1BG,HP,CAP1,MIF,CCT8,KPNB1,FUCA2,CTSB,GDI2,ACLY,APEH
GO:BP	cellular localization	GO:0051641	2.08736e-20	19.6804	3541	217	108	18117	AGRN,TFRC,RAN,PGAM1,CTSC,SPTAN1,RPSA,HSPA4,XRCC5,GPI,HSP90AB1,HSPD1,CLSTN1,NME2,IDH1,CTSD,HSP90AA1,RPLP2,HSPA8,TUBA1B,ALDOA,HSPA1B,XRCC6,ACTN4,GGH,CLTC,TUBB4B,PKM,FGA,HSP90B1,PSMA5,APP,TUBB,YWHAE,EEF2,YWHAZ,PSAP,GPC3,SPTBN1,CDH2,GSN,PTPRK,F10,SERPINA3,FGG,TTR,APOE,HSPA5,FN1,PROC,F2,SERPINF2,CALR,ACTG1,THBS1,PROS1,CPE,C3,LRG1,A2M,LGALS3BP,RNASET2,RELN,CLU,APOA1,AHSG,DAG1,SERPINA1,ITIH3,ORM2,ALB,OR…
GO:BP	granulocyte activation	GO:0036230	2.93593e-20	19.5323	504	217	42	18117	PGAM1,CTSC,SPTAN1,XRCC5,GPI,HSP90AB1,NME2,IDH1,CTSD,HSP90AA1,HSPA8,ALDOA,HSPA1B,XRCC6,GGH,TUBB4B,PKM,PSMA5,TUBB,EEF2,PSAP,GSN,SERPINA3,TTR,C3,LRG1,RNASET2,AHSG,SERPINA1,ORM2,ORM1,A1BG,HP,CAP1,MIF,CCT8,KPNB1,FUCA2,CTSB,GDI2,ACLY,APEH
GO:BP	myeloid leukocyte activation	GO:0002274	6.01013e-20	19.2211	667	217	47	18117	PGAM1,CTSC,SPTAN1,XRCC5,GPI,HSP90AB1,HSPD1,NME2,IDH1,CTSD,HSP90AA1,HSPA8,ALDOA,HSPA1B,XRCC6,GGH,TUBB4B,PKM,PSMA5,APP,TUBB,EEF2,PSAP,GSN,SERPINA3,TTR,THBS1,C3,LRG1,RNASET2,CLU,AHSG,SERPINA1,ORM2,ORM1,A1BG,HP,CAP1,MIF,DHRS2,CCT8,KPNB1,FUCA2,CTSB,GDI2,ACLY,APEH
GO:BP	myeloid leukocyte mediated immunity	GO:0002444	1.0875e-19	18.9636	551	217	43	18117	PGAM1,CTSC,SPTAN1,XRCC5,GPI,HSP90AB1,NME2,IDH1,CTSD,HSP90AA1,HSPA8,ALDOA,HSPA1B,XRCC6,GGH,TUBB4B,PKM,PSMA5,TUBB,EEF2,PSAP,GSN,SERPINA3,TTR,F2,C3,LRG1,RNASET2,AHSG,SERPINA1,ORM2,ORM1,A1BG,HP,CAP1,MIF,CCT8,KPNB1,FUCA2,CTSB,GDI2,ACLY,APEH
GO:BP	regulation of peptidase activity	GO:0052547	1.38446e-19	18.8587	467	217	40	18117	GPI,GAPDH,HSPD1,CTSD,FBLN1,HSPE1,PSMA3,C5,APP,YWHAE,TFPI,VTN,GPC3,SERPINA7,GSN,SERPINA3,SERPIND1,C4B,FN1,SERPINF2,ITIH2,THBS1,PROS1,C3,A2M,SERPINA5,SERPINA6,AHSG,SERPINA1,AMBP,SERPINF1,ITIH3,SERPINC1,AGT,PEBP1,PRDX3,PSME1,SERPINA11,APLP2,SERPINA4
GO:BP	negative regulation of peptidase activity	GO:0010466	1.5049e-19	18.8225	267	217	32	18117	GPI,GAPDH,C5,APP,YWHAE,TFPI,VTN,GPC3,SERPINA7,SERPINA3,SERPIND1,C4B,SERPINF2,ITIH2,THBS1,PROS1,C3,A2M,SERPINA5,SERPINA6,AHSG,SERPINA1,AMBP,SERPINF1,ITIH3,SERPINC1,AGT,PEBP1,PRDX3,SERPINA11,APLP2,SERPINA4
GO:BP	immune system process	GO:0002376	2.11551e-19	18.6746	3278	217	102	18117	TFRC,FASN,AHCY,PGAM1,CTSC,SPTAN1,XRCC5,GPI,GAPDH,PSMA7,PSMB6,HSP90AB1,HSPD1,NME2,IDH1,CTSD,HSP90AA1,PSMA3,C5,PSMA1,HSPA8,PRDX1,ALDOA,HSPA1B,XRCC6,GGH,CLTC,TUBB4B,PKM,FGA,PSMA5,RBP4,APP,TUBB,EEF2,PSAP,VTN,CPN1,GPC3,GSN,PTPRK,SERPINA3,TTR,APOB,APOE,C4BPA,CFI,APOA2,C4B,FN1,F2,CALR,ACTG1,PDIA3,THBS1,PROS1,C3,LRG1,A2M,SDC4,RNASET2,CLU,APOA1,C2,AHSG,SERPINA1,CPN2,AMBP,ORM2,SERPINC1,ORM1,TF,AZGP1,A1BG,H…
GO:BP	leukocyte degranulation	GO:0043299	2.95805e-19	18.529	535	217	42	18117	PGAM1,CTSC,SPTAN1,XRCC5,GPI,HSP90AB1,NME2,IDH1,CTSD,HSP90AA1,HSPA8,ALDOA,HSPA1B,XRCC6,GGH,TUBB4B,PKM,PSMA5,TUBB,EEF2,PSAP,GSN,SERPINA3,TTR,C3,LRG1,RNASET2,AHSG,SERPINA1,ORM2,ORM1,A1BG,HP,CAP1,MIF,CCT8,KPNB1,FUCA2,CTSB,GDI2,ACLY,APEH
GO:BP	negative regulation of endopeptidase activity	GO:0010951	3.79932e-19	18.4203	253	217	31	18117	GPI,GAPDH,C5,APP,YWHAE,TFPI,VTN,SERPINA7,SERPINA3,SERPIND1,C4B,SERPINF2,ITIH2,THBS1,PROS1,C3,A2M,SERPINA5,SERPINA6,AHSG,SERPINA1,AMBP,SERPINF1,ITIH3,SERPINC1,AGT,PEBP1,PRDX3,SERPINA11,APLP2,SERPINA4
GO:BP	localization	GO:0051179	4.79232e-19	18.3195	6901	217	153	18117	AGRN,TFRC,GLUD1,RAN,PGAM1,CTSC,SPTAN1,RPSA,AKR1C1,HSPA4,XRCC5,GPI,ATRN,PSMA7,PSMB6,HSP90AB1,HSPD1,CLSTN1,NME2,IDH1,CTSD,HSP90AA1,FBLN1,RPLP2,PDIA4,PSMA3,C5,PSMA1,HSPA8,TUBA1B,CLIC1,ALDOA,HSPA1B,XRCC6,ACTN4,GGH,CLTC,TUBB4B,PKM,FGA,HSP90B1,PSMA5,RBP4,APP,TUBB,YWHAE,EEF2,YWHAZ,PSAP,VTN,GPC3,SERPINA7,SPTBN1,CDH2,GSN,CLSTN3,PTPRK,F10,SERPINA3,FGG,TTR,APOB,APOE,APOM,C4BPA,CFI,APOC4-APOC2,HSPA5,APOA2,C4…
GO:BP	immune response	GO:0006955	5.58689e-19	18.2528	2311	217	84	18117	TFRC,AHCY,PGAM1,CTSC,SPTAN1,XRCC5,GPI,GAPDH,PSMA7,PSMB6,HSP90AB1,HSPD1,NME2,IDH1,CTSD,HSP90AA1,PSMA3,C5,PSMA1,HSPA8,PRDX1,ALDOA,HSPA1B,XRCC6,GGH,TUBB4B,PKM,FGA,PSMA5,APP,TUBB,EEF2,PSAP,VTN,CPN1,GSN,SERPINA3,TTR,APOE,C4BPA,CFI,APOA2,C4B,F2,ACTG1,THBS1,PROS1,C3,LRG1,A2M,RNASET2,CLU,APOA1,C2,AHSG,SERPINA1,CPN2,AMBP,ORM2,SERPINC1,ORM1,TF,A1BG,HP,BPIFB2,PSME1,PSMB5,PSMA6,CAP1,FGL1,CADM1,MIF,FGB,CCT8,K…
GO:BP	myeloid cell activation involved in immune response	GO:0002275	6.93487e-19	18.159	547	217	42	18117	PGAM1,CTSC,SPTAN1,XRCC5,GPI,HSP90AB1,NME2,IDH1,CTSD,HSP90AA1,HSPA8,ALDOA,HSPA1B,XRCC6,GGH,TUBB4B,PKM,PSMA5,TUBB,EEF2,PSAP,GSN,SERPINA3,TTR,C3,LRG1,RNASET2,AHSG,SERPINA1,ORM2,ORM1,A1BG,HP,CAP1,MIF,CCT8,KPNB1,FUCA2,CTSB,GDI2,ACLY,APEH
GO:BP	response to stress	GO:0006950	5.01144e-18	17.3	4170	217	114	18117	UBA1,AHCY,CTSC,HSPA4,XRCC5,GPI,ATRN,GAPDH,PSMA7,PSMB6,HSP90AB1,HSPD1,NME2,IDH1,HSP90AA1,PGK1,LDHA,FBLN1,HSPE1,GSR,PDIA4,ENO1,PSMA3,C5,PSMA1,HSPA8,CLIC1,PRDX1,HSPA1B,XRCC6,ACTN4,TUBB4B,PKM,FGA,HSP90B1,PSMA5,APP,TUBB,YWHAE,TFPI,EEF2,YWHAZ,VTN,P4HB,GSN,PTPRK,F10,SERPINA3,FGG,APOE,C4BPA,CFI,SERPIND1,HSPA5,C4B,FN1,PROC,F2,SERPINF2,CALR,ACTG1,PDIA3,THBS1,PROS1,C3,A2M,SERPINA5,LGALS3BP,SDC4,RNASET2,RELN…
GO:BP	protein metabolic process	GO:0019538	7.75422e-18	17.1105	5808	217	137	18117	TFRC,UBA1,CTSC,RPSA,XRCC5,GPI,GAPDH,PSMA7,PSMB6,HSP90AB1,HSPD1,EEF1G,NME2,CTSD,HSP90AA1,PGK1,FBLN1,HSPE1,RPLP2,PDIA4,ENO1,PSMA3,C5,PSMA1,HSPA8,HSPA1B,XRCC6,GGH,CLTC,PKM,FGA,HSP90B1,PSMA5,APP,YWHAE,TFPI,EEF2,YWHAZ,VTN,CPN1,SET,P4HB,GPC3,SERPINA7,SPTBN1,CDH2,GSN,PTPRK,F10,SERPINA3,FGG,TTR,APOB,APOE,APOM,C4BPA,CFI,SERPIND1,HSPA5,APOA2,C4B,FN1,PROC,F2,SERPINF2,CALR,LAMC1,PDIA3,ITIH2,THBS1,PROS1,CPE,C…
GO:BP	regulation of proteolysis	GO:0030162	9.0614e-18	17.0428	752	217	47	18117	CTSC,GPI,GAPDH,HSP90AB1,HSPD1,CTSD,FBLN1,HSPE1,ENO1,PSMA3,C5,HSPA1B,APP,YWHAE,TFPI,VTN,GPC3,SERPINA7,GSN,SERPINA3,APOE,SERPIND1,C4B,FN1,F2,SERPINF2,ITIH2,THBS1,PROS1,C3,A2M,SERPINA5,CLU,SERPINA6,AHSG,SERPINA1,AMBP,SERPINF1,ITIH3,SERPINC1,AGT,PEBP1,PRDX3,PSME1,SERPINA11,APLP2,SERPINA4
GO:BP	regulation of endopeptidase activity	GO:0052548	1.01904e-17	16.9918	437	217	37	18117	GPI,GAPDH,HSPD1,CTSD,HSPE1,PSMA3,C5,APP,YWHAE,TFPI,VTN,SERPINA7,GSN,SERPINA3,SERPIND1,C4B,SERPINF2,ITIH2,THBS1,PROS1,C3,A2M,SERPINA5,SERPINA6,AHSG,SERPINA1,AMBP,SERPINF1,ITIH3,SERPINC1,AGT,PEBP1,PRDX3,PSME1,SERPINA11,APLP2,SERPINA4
GO:BP	cell activation involved in immune response	GO:0002263	1.11396e-17	16.9531	721	217	46	18117	TFRC,PGAM1,CTSC,SPTAN1,XRCC5,GPI,HSP90AB1,HSPD1,NME2,IDH1,CTSD,HSP90AA1,HSPA8,ALDOA,HSPA1B,XRCC6,GGH,TUBB4B,PKM,PSMA5,APP,TUBB,EEF2,PSAP,GSN,SERPINA3,TTR,C3,LRG1,RNASET2,AHSG,SERPINA1,ORM2,ORM1,A1BG,HP,CAP1,MIF,CCT8,KPNB1,FUCA2,ICAM1,CTSB,GDI2,ACLY,APEH
GO:BP	negative regulation of proteolysis	GO:0045861	1.3409e-17	16.8726	359	217	34	18117	GPI,GAPDH,HSP90AB1,C5,APP,YWHAE,TFPI,VTN,GPC3,SERPINA7,SERPINA3,SERPIND1,C4B,F2,SERPINF2,ITIH2,THBS1,PROS1,C3,A2M,SERPINA5,SERPINA6,AHSG,SERPINA1,AMBP,SERPINF1,ITIH3,SERPINC1,AGT,PEBP1,PRDX3,SERPINA11,APLP2,SERPINA4
GO:BP	leukocyte activation involved in immune response	GO:0002366	6.12368e-17	16.213	717	217	45	18117	TFRC,PGAM1,CTSC,SPTAN1,XRCC5,GPI,HSP90AB1,HSPD1,NME2,IDH1,CTSD,HSP90AA1,HSPA8,ALDOA,HSPA1B,XRCC6,GGH,TUBB4B,PKM,PSMA5,TUBB,EEF2,PSAP,GSN,SERPINA3,TTR,C3,LRG1,RNASET2,AHSG,SERPINA1,ORM2,ORM1,A1BG,HP,CAP1,MIF,CCT8,KPNB1,FUCA2,ICAM1,CTSB,GDI2,ACLY,APEH
GO:BP	cell activation	GO:0001775	9.32287e-17	16.0305	1495	217	64	18117	TFRC,PGAM1,CTSC,SPTAN1,XRCC5,GPI,HSP90AB1,HSPD1,NME2,IDH1,CTSD,HSP90AA1,HSPA8,CLIC1,PRDX1,ALDOA,HSPA1B,XRCC6,GGH,TUBB4B,PKM,FGA,PSMA5,APP,TUBB,EEF2,YWHAZ,PSAP,GSN,PTPRK,SERPINA3,FGG,TTR,APOE,FN1,F2,ACTG1,THBS1,C3,LRG1,SDC4,RNASET2,CLU,AHSG,SERPINA1,ORM2,ORM1,A1BG,HP,CAP1,FGL1,SOD1,MIF,DHRS2,FGB,CCT8,KPNB1,IGF2,FUCA2,ICAM1,CTSB,GDI2,ACLY,APEH
GO:BP	negative regulation of hydrolase activity	GO:0051346	1.00471e-15	14.998	470	217	36	18117	GPI,GAPDH,C5,APP,YWHAE,TFPI,VTN,SET,GPC3,SERPINA7,SERPINA3,SERPIND1,APOA2,C4B,SERPINF2,ITIH2,THBS1,PROS1,C3,A2M,SERPINA5,APOA1,SERPINA6,AHSG,SERPINA1,AMBP,SERPINF1,ITIH3,APOC3,SERPINC1,AGT,PEBP1,PRDX3,SERPINA11,APLP2,SERPINA4
GO:BP	regulation of biological quality	GO:0065008	1.50386e-15	14.8228	4131	217	109	18117	AGRN,TFRC,GLUD1,SPTAN1,ALDH1A1,AKR1C1,XRCC5,GPI,GAPDH,PSMA7,PSMB6,HSP90AB1,HSPD1,CLSTN1,NME2,HSP90AA1,FBLN1,GSR,PDIA4,PSMA3,PSMA1,HSPA8,CLIC1,PRDX1,ALDOA,HSPA1B,XRCC6,FGA,HSP90B1,PSMA5,RBP4,APP,TUBB,YWHAE,TFPI,YWHAZ,VTN,SET,P4HB,SERPINA7,SPTBN1,CDH2,GSN,CLSTN3,F10,SERPINA3,FGG,TTR,APOB,APOE,APOM,SERPIND1,HSPA5,APOA2,FN1,PROC,F2,SERPINF2,CALR,LAMC1,ACTG1,PDIA3,THBS1,PROS1,C3,A2M,SERPINA5,RELN,CLU,…
GO:BP	response to stimulus	GO:0050896	6.79401e-15	14.1679	9407	217	174	18117	AGRN,TFRC,FASN,UBA1,AHCY,PGAM1,CTSC,SPTAN1,AKR1C1,HSPA4,XRCC5,GPI,ATRN,GAPDH,PSMA7,PSMB6,HSP90AB1,HSPD1,EEF1G,NME2,IDH1,CTSD,HSP90AA1,KRT19,PGK1,LDHA,FBLN1,HSPE1,TALDO1,GSR,PDIA4,ENO1,ATIC,PSMA3,C5,PSMA1,HSPA8,TUBA1B,CLIC1,PRDX1,ALDOA,HSPA1B,XRCC6,ACTN4,GGH,CLTC,TUBB4B,PKM,FGA,HSP90B1,PSMA5,RBP4,APP,TUBB,YWHAE,TFPI,EEF2,YWHAZ,PSAP,VTN,CPN1,P4HB,GPC3,SPTBN1,CDH2,GSN,FLNB,PTPRK,F10,SERPINA3,FGG,TTR…
GO:BP	biological process involved in interspecies interaction between organisms	GO:0044419	4.56397e-14	13.3407	2255	217	75	18117	TFRC,RAN,RPSA,XRCC5,GAPDH,PSMA7,PSMB6,HSP90AB1,HSPD1,EEF1G,HSP90AA1,KRT19,FBLN1,RPLP2,ENO1,PSMA3,C5,PSMA1,HSPA8,PRDX1,HSPA1B,XRCC6,TUBB4B,FGA,PSMA5,APP,TUBB,YWHAE,TFPI,SET,P4HB,GPC3,GSN,APOB,APOE,C4BPA,CFI,APOA2,C4B,FN1,F2,ACTG1,C3,LRG1,A2M,RNASET2,CLU,C2,DAG1,AMBP,TF,HP,BPIFB2,PRDX3,CFL1,KRT8,PSME1,PSMB5,PSMA6,KRT18,SSB,ILF3,RPLP0,CADM1,RPL12,MIF,FGB,KPNB1,NPM1,FUCA2,ICAM1,CTSB,PGC,HNRNPK,PSMB4
GO:BP	cellular protein metabolic process	GO:0044267	5.36822e-14	13.2702	5229	217	122	18117	TFRC,UBA1,CTSC,RPSA,XRCC5,GPI,GAPDH,PSMA7,PSMB6,HSP90AB1,HSPD1,EEF1G,NME2,CTSD,HSP90AA1,FBLN1,HSPE1,RPLP2,PDIA4,ENO1,PSMA3,C5,PSMA1,HSPA1B,XRCC6,CLTC,PKM,FGA,HSP90B1,PSMA5,APP,YWHAE,TFPI,EEF2,YWHAZ,VTN,SET,P4HB,GPC3,SERPINA7,SPTBN1,CDH2,GSN,PTPRK,SERPINA3,FGG,TTR,APOB,APOE,SERPIND1,HSPA5,APOA2,C4B,FN1,PROC,F2,SERPINF2,CALR,LAMC1,PDIA3,ITIH2,THBS1,PROS1,CPE,C3,A2M,SERPINA5,SDC4,RELN,CLU,APOA1,SERP…
GO:BP	response to external stimulus	GO:0009605	6.02565e-14	13.22	2944	217	87	18117	AHCY,CTSC,SPTAN1,XRCC5,GPI,GAPDH,PSMA7,PSMB6,HSP90AB1,HSPD1,EEF1G,HSP90AA1,LDHA,ENO1,PSMA3,C5,PSMA1,HSPA8,PRDX1,XRCC6,TUBB4B,PKM,FGA,PSMA5,APP,TUBB,TFPI,EEF2,VTN,GPC3,SPTBN1,CDH2,GSN,FGG,APOB,APOE,C4BPA,CFI,SERPIND1,HSPA5,C4B,PROC,F2,SERPINF2,CALR,ACTG1,THBS1,PROS1,C3,LRG1,A2M,RNASET2,RELN,CLU,APOA1,C2,AHSG,DAG1,SERPINF1,SERPINC1,ALB,APOH,TF,PCSK9,AGT,HP,BPIFB2,GOT1,PRDX3,CFL1,KRT8,PSME1,PSMB5,PS…
GO:BP	leukocyte activation	GO:0045321	4.02066e-13	12.3957	1332	217	55	18117	TFRC,PGAM1,CTSC,SPTAN1,XRCC5,GPI,HSP90AB1,HSPD1,NME2,IDH1,CTSD,HSP90AA1,HSPA8,PRDX1,ALDOA,HSPA1B,XRCC6,GGH,TUBB4B,PKM,PSMA5,APP,TUBB,EEF2,PSAP,GSN,PTPRK,SERPINA3,TTR,THBS1,C3,LRG1,SDC4,RNASET2,CLU,AHSG,SERPINA1,ORM2,ORM1,A1BG,HP,CAP1,FGL1,SOD1,MIF,DHRS2,CCT8,KPNB1,IGF2,FUCA2,ICAM1,CTSB,GDI2,ACLY,APEH
GO:BP	response to chemical	GO:0042221	3.6442e-12	11.4384	4781	217	112	18117	AGRN,TFRC,FASN,AHCY,CTSC,SPTAN1,AKR1C1,HSPA4,XRCC5,GPI,GAPDH,PSMA7,PSMB6,HSP90AB1,HSPD1,NME2,IDH1,HSP90AA1,KRT19,PGK1,LDHA,HSPE1,TALDO1,GSR,ENO1,ATIC,PSMA3,C5,PSMA1,HSPA8,TUBA1B,PRDX1,HSPA1B,XRCC6,ACTN4,GGH,PKM,FGA,HSP90B1,PSMA5,RBP4,APP,TFPI,EEF2,YWHAZ,VTN,CPN1,P4HB,GPC3,SPTBN1,GSN,PTPRK,FGG,APOB,APOE,APOM,SERPIND1,HSPA5,APOA2,C4B,FN1,SERPINF2,CALR,ACTG1,PDIA3,THBS1,LRG1,RELN,CLU,APOA1,C2,AHSG,D…
GO:BP	regulation of hydrolase activity	GO:0051336	5.43625e-12	11.2647	1321	217	53	18117	AGRN,ALDH1A1,GPI,GAPDH,HSP90AB1,HSPD1,CTSD,FBLN1,HSPE1,PSMA3,C5,HSP90B1,APP,YWHAE,TFPI,VTN,SET,GPC3,SERPINA7,GSN,SERPINA3,SERPIND1,APOA2,C4B,FN1,SERPINF2,ITIH2,THBS1,PROS1,C3,A2M,SERPINA5,APOA1,SERPINA6,AHSG,SERPINA1,AMBP,SERPINF1,ITIH3,APOC3,SERPINC1,APOH,AGT,PEBP1,PRDX3,PSME1,SOD1,SERPINA11,APLP2,NPM1,ICAM1,SERPINA4,GDI2
GO:BP	response to organic substance	GO:0010033	1.71837e-11	10.7649	3412	217	90	18117	AGRN,TFRC,FASN,CTSC,AKR1C1,HSPA4,XRCC5,GPI,GAPDH,PSMA7,PSMB6,HSP90AB1,HSPD1,NME2,IDH1,HSP90AA1,KRT19,LDHA,HSPE1,TALDO1,ATIC,PSMA3,PSMA1,HSPA8,TUBA1B,HSPA1B,ACTN4,GGH,PKM,HSP90B1,PSMA5,RBP4,APP,TFPI,EEF2,YWHAZ,VTN,CPN1,P4HB,GPC3,GSN,PTPRK,FGG,APOB,APOE,APOM,HSPA5,APOA2,C4B,FN1,SERPINF2,CALR,ACTG1,PDIA3,THBS1,LRG1,CLU,APOA1,AHSG,DAG1,SERPINF1,VASN,PCSK9,AGT,GOT1,PRDX3,CFL1,KRT8,PSME1,PSMB5,PSMA6,KR…
GO:BP	protein activation cascade	GO:0072376	2.20446e-11	10.6567	28	217	11	18117	FBLN1,FGA,TFPI,F10,FGG,FN1,F2,A2M,SERPINC1,APOH,FGB
GO:BP	blood coagulation, fibrin clot formation	GO:0072378	2.20446e-11	10.6567	28	217	11	18117	FBLN1,FGA,TFPI,F10,FGG,FN1,F2,A2M,SERPINC1,APOH,FGB
GO:BP	primary metabolic process	GO:0044238	4.51979e-11	10.3449	10584	217	179	18117	AGRN,TFRC,GLUD1,ACAT2,FASN,RAN,UBA1,AHCY,PGAM1,CTSC,RPSA,ALDH1A1,AKR1C1,XRCC5,GPI,GAPDH,PSMA7,PSMB6,QPRT,HSP90AB1,HSPD1,EEF1G,NME2,IDH1,CTSD,HSP90AA1,PGK1,LDHA,FBLN1,HSPE1,TALDO1,RPLP2,GSR,PDIA4,ENO1,ATIC,PSMA3,PSAT1,C5,PSMA1,HSPA8,ALDOA,HSPA1B,XRCC6,ACTN4,GGH,CLTC,PKM,MDH1,FGA,HSP90B1,PSMA5,TKT,TPI1,RBP4,APP,YWHAE,TFPI,EEF2,YWHAZ,PSAP,VTN,CPN1,SET,P4HB,GPC3,SERPINA7,SPTBN1,CDH2,GSN,PTPRK,F10,SER…
GO:BP	regulation of response to stress	GO:0080134	5.05543e-11	10.2962	1443	217	54	18117	CTSC,XRCC5,PSMA7,PSMB6,HSP90AB1,HSPD1,HSP90AA1,ENO1,PSMA3,PSMA1,HSPA8,PRDX1,HSPA1B,XRCC6,FGA,PSMA5,APP,YWHAE,TFPI,VTN,P4HB,FGG,APOE,HSPA5,PROC,F2,SERPINF2,ACTG1,THBS1,PROS1,C3,A2M,CLU,APOA1,AHSG,AMBP,SERPINF1,SERPINC1,APOH,AGT,PSME1,PSMB5,PSMA6,CADM1,SOD1,MIF,FGB,YBX1,SPP1,NPM1,PGC,HNRNPK,LMNA,PSMB4
GO:BP	organic substance metabolic process	GO:0071704	5.31629e-11	10.2744	11326	217	186	18117	AGRN,TFRC,GLUD1,ACAT2,FASN,RAN,UBA1,AHCY,PGAM1,CTSC,RPSA,ALDH1A1,AKR1C1,XRCC5,GPI,GAPDH,PSMA7,PSMB6,QPRT,HSP90AB1,HSPD1,EEF1G,NME2,IDH1,CTSD,HSP90AA1,PGK1,LDHA,FBLN1,HSPE1,TALDO1,RPLP2,GSR,PDIA4,ENO1,ATIC,PSMA3,PSAT1,C5,PSMA1,HSPA8,CLIC1,ALDOA,HSPA1B,XRCC6,ACTN4,GGH,CLTC,PKM,MDH1,FGA,HSP90B1,PSMA5,TKT,TPI1,RBP4,APP,YWHAE,BTD,TFPI,EEF2,YWHAZ,PSAP,VTN,CPN1,SET,P4HB,GPC3,SERPINA7,SPTBN1,CDH2,GSN,PTP…
GO:BP	cellular response to cytokine stimulus	GO:0071345	8.41408e-11	10.075	1132	217	47	18117	TFRC,FASN,XRCC5,GAPDH,PSMA7,PSMB6,HSP90AB1,HSPD1,HSP90AA1,TALDO1,ATIC,PSMA3,PSMA1,HSPA8,TUBA1B,HSPA1B,ACTN4,HSP90B1,PSMA5,TFPI,YWHAZ,P4HB,GSN,FGG,APOB,HSPA5,FN1,ACTG1,PDIA3,THBS1,APOA1,CFL1,KRT8,PSME1,PSMB5,PSMA6,KRT18,RPLP0,HSPA9,SOD1,MIF,FGB,CRLF1,ICAM1,NCL,LMNB1,PSMB4
GO:BP	biological process involved in symbiotic interaction	GO:0044403	8.9075e-11	10.0502	1001	217	44	18117	TFRC,RAN,RPSA,XRCC5,GAPDH,PSMA7,PSMB6,HSP90AB1,HSPD1,HSP90AA1,KRT19,FBLN1,RPLP2,PSMA3,HSPA8,HSPA1B,XRCC6,YWHAE,SET,P4HB,GSN,APOE,CFI,APOA2,FN1,F2,DAG1,AMBP,CFL1,KRT8,PSMB5,KRT18,SSB,ILF3,RPLP0,CADM1,RPL12,KPNB1,NPM1,FUCA2,ICAM1,CTSB,HNRNPK,PSMB4
GO:BP	defense response	GO:0006952	9.11394e-11	10.0403	1818	217	61	18117	AHCY,CTSC,XRCC5,ATRN,GAPDH,PSMA7,PSMB6,HSP90AB1,HSPD1,HSP90AA1,PSMA3,C5,PSMA1,PRDX1,XRCC6,TUBB4B,FGA,PSMA5,APP,TUBB,GSN,SERPINA3,APOE,C4BPA,CFI,C4B,FN1,PROC,F2,SERPINF2,ACTG1,THBS1,C3,A2M,LGALS3BP,RNASET2,CLU,APOA1,C2,AHSG,SERPINA1,SERPINF1,ORM2,SAA4,SERPINC1,ORM1,TF,AGT,HP,PSME1,PSMB5,PSMA6,ILF3,CADM1,SOD1,MIF,FGB,SPP1,ICAM1,PGC,PSMB4
GO:BP	regulation of cellular protein metabolic process	GO:0032268	3.44316e-10	9.46304	2541	217	73	18117	TFRC,CTSC,XRCC5,GPI,GAPDH,HSP90AB1,HSPD1,CTSD,HSP90AA1,FBLN1,HSPE1,ENO1,C5,HSPA1B,XRCC6,PKM,HSP90B1,APP,YWHAE,TFPI,EEF2,VTN,SET,GPC3,SERPINA7,GSN,SERPINA3,APOE,SERPIND1,HSPA5,C4B,FN1,F2,SERPINF2,CALR,ITIH2,THBS1,PROS1,C3,A2M,SERPINA5,SDC4,RELN,CLU,APOA1,SERPINA6,AHSG,DAG1,SERPINA1,AMBP,SERPINF1,ITIH3,SERPINC1,TF,PCSK9,AGT,PEBP1,PRDX3,PSME1,ILF3,SOD1,MIF,SERPINA11,YBX1,CRLF1,APLP2,IGF2,NPM1,ICAM1,…
GO:BP	response to cytokine	GO:0034097	3.79868e-10	9.42037	1226	217	48	18117	TFRC,FASN,XRCC5,GAPDH,PSMA7,PSMB6,HSP90AB1,HSPD1,HSP90AA1,TALDO1,ATIC,PSMA3,PSMA1,HSPA8,TUBA1B,HSPA1B,ACTN4,HSP90B1,PSMA5,APP,TFPI,YWHAZ,P4HB,GSN,FGG,APOB,HSPA5,FN1,ACTG1,PDIA3,THBS1,APOA1,CFL1,KRT8,PSME1,PSMB5,PSMA6,KRT18,RPLP0,HSPA9,SOD1,MIF,FGB,CRLF1,ICAM1,NCL,LMNB1,PSMB4
GO:BP	regulation of protein metabolic process	GO:0051246	8.37529e-10	9.077	2704	217	75	18117	TFRC,CTSC,XRCC5,GPI,GAPDH,HSP90AB1,HSPD1,CTSD,HSP90AA1,FBLN1,HSPE1,ENO1,PSMA3,C5,HSPA1B,XRCC6,PKM,HSP90B1,APP,YWHAE,TFPI,EEF2,VTN,SET,GPC3,SERPINA7,GSN,SERPINA3,APOE,C4BPA,SERPIND1,HSPA5,C4B,FN1,F2,SERPINF2,CALR,ITIH2,THBS1,PROS1,C3,A2M,SERPINA5,SDC4,RELN,CLU,APOA1,SERPINA6,AHSG,DAG1,SERPINA1,AMBP,SERPINF1,ITIH3,SERPINC1,TF,PCSK9,AGT,PEBP1,PRDX3,PSME1,ILF3,SOD1,MIF,SERPINA11,YBX1,CRLF1,APLP2,IGF2…
GO:BP	negative regulation of catalytic activity	GO:0043086	8.65964e-10	9.0625	851	217	39	18117	GPI,GAPDH,C5,APP,YWHAE,TFPI,VTN,SET,GPC3,SERPINA7,SERPINA3,APOE,SERPIND1,APOA2,C4B,SERPINF2,ITIH2,THBS1,PROS1,C3,A2M,SERPINA5,APOA1,SERPINA6,AHSG,SERPINA1,AMBP,SERPINF1,ITIH3,APOC3,SERPINC1,AGT,HP,PEBP1,PRDX3,SERPINA11,APLP2,NPM1,SERPINA4
GO:BP	negative regulation of blood coagulation	GO:0030195	1.13679e-09	8.94432	50	217	12	18117	FGA,TFPI,VTN,FGG,APOE,PROC,F2,SERPINF2,THBS1,PROS1,APOH,FGB
GO:BP	regulation of catalytic activity	GO:0050790	1.18272e-09	8.92712	2545	217	72	18117	AGRN,ALDH1A1,XRCC5,GPI,GAPDH,HSP90AB1,HSPD1,CTSD,HSP90AA1,FBLN1,HSPE1,PSMA3,C5,XRCC6,HSP90B1,APP,YWHAE,TFPI,PSAP,VTN,SET,GPC3,SERPINA7,GSN,SERPINA3,APOE,SERPIND1,APOC4-APOC2,APOA2,C4B,FN1,F2,SERPINF2,ITIH2,THBS1,PROS1,C3,A2M,SERPINA5,SDC4,RELN,CLU,APOA1,SERPINA6,AHSG,DAG1,SERPINA1,CPN2,AMBP,SERPINF1,ITIH3,APOC3,SERPINC1,APOH,TF,AGT,HP,PEBP1,PRDX3,PSME1,CAP1,SOD1,SERPINA11,APLP2,IGF2,NPM1,ICAM1,CT…
GO:BP	negative regulation of cellular protein metabolic process	GO:0032269	1.32066e-09	8.87921	1082	217	44	18117	GPI,GAPDH,HSP90AB1,FBLN1,C5,HSPA1B,APP,YWHAE,TFPI,VTN,SET,GPC3,SERPINA7,SERPINA3,APOE,SERPIND1,C4B,F2,SERPINF2,CALR,ITIH2,THBS1,PROS1,C3,A2M,SERPINA5,SERPINA6,AHSG,SERPINA1,AMBP,SERPINF1,ITIH3,SERPINC1,AGT,PEBP1,PRDX3,ILF3,SERPINA11,YBX1,APLP2,NPM1,NCL,SERPINA4,DKK1
GO:BP	organic substance catabolic process	GO:1901575	1.44064e-09	8.84145	2267	217	67	18117	AGRN,GLUD1,ACAT2,UBA1,AHCY,PGAM1,CTSC,RPSA,ALDH1A1,GPI,GAPDH,PSMA7,PSMB6,QPRT,HSP90AB1,IDH1,CTSD,HSP90AA1,PGK1,LDHA,RPLP2,ENO1,PSMA3,PSMA1,HSPA8,ALDOA,HSPA1B,CLTC,PKM,HSP90B1,PSMA5,TPI1,APP,YWHAZ,CPN1,SET,GPC3,APOB,APOE,C4BPA,HSPA5,APOA2,SDC4,RNASET2,CLU,APOA1,AMBP,APOC3,NOTUM,PCSK9,GOT1,PSME1,PSMB5,PSMA6,SSB,RPLP0,RPL12,ECH1,YBX1,KPNB1,HNRNPC,SPP1,NPM1,FUCA2,CTSB,PSMB4,VCAN
GO:BP	negative regulation of hemostasis	GO:1900047	1.47105e-09	8.83237	51	217	12	18117	FGA,TFPI,VTN,FGG,APOE,PROC,F2,SERPINF2,THBS1,PROS1,APOH,FGB
GO:BP	metabolic process	GO:0008152	1.52826e-09	8.8158	11827	217	188	18117	AGRN,TFRC,GLUD1,ACAT2,FASN,RAN,UBA1,AHCY,PGAM1,CTSC,RPSA,ALDH1A1,AKR1C1,XRCC5,GPI,GAPDH,PSMA7,PSMB6,QPRT,HSP90AB1,HSPD1,EEF1G,NME2,IDH1,CTSD,HSP90AA1,PGK1,LDHA,FBLN1,HSPE1,TALDO1,RPLP2,GSR,PDIA4,ENO1,ATIC,PSMA3,PSAT1,C5,PSMA1,HSPA8,CLIC1,PRDX1,ALDOA,HSPA1B,XRCC6,ACTN4,GGH,CLTC,PKM,MDH1,FGA,HSP90B1,PSMA5,TKT,TPI1,RBP4,APP,YWHAE,BTD,TFPI,EEF2,YWHAZ,PSAP,VTN,CPN1,SET,P4HB,GPC3,SERPINA7,SPTBN1,CDH2,G…
GO:BP	hemostasis	GO:0007599	1.90742e-09	8.71955	351	217	25	18117	GPI,FBLN1,CLIC1,FGA,TFPI,YWHAZ,VTN,F10,FGG,APOE,SERPIND1,FN1,PROC,F2,SERPINF2,ACTG1,THBS1,PROS1,A2M,SERPINA5,SERPINA1,SERPINC1,APOH,F5,FGB
GO:BP	negative regulation of protein metabolic process	GO:0051248	2.68039e-09	8.5718	1151	217	45	18117	GPI,GAPDH,HSP90AB1,FBLN1,C5,HSPA1B,APP,YWHAE,TFPI,VTN,SET,GPC3,SERPINA7,SERPINA3,APOE,SERPIND1,C4B,F2,SERPINF2,CALR,ITIH2,THBS1,PROS1,C3,A2M,SERPINA5,CLU,SERPINA6,AHSG,SERPINA1,AMBP,SERPINF1,ITIH3,SERPINC1,AGT,PEBP1,PRDX3,ILF3,SERPINA11,YBX1,APLP2,NPM1,NCL,SERPINA4,DKK1
GO:BP	regulation of blood coagulation	GO:0030193	2.78005e-09	8.55595	68	217	13	18117	FGA,TFPI,VTN,FGG,APOE,PROC,F2,SERPINF2,THBS1,PROS1,SERPINC1,APOH,FGB
GO:BP	cellular response to chemical stimulus	GO:0070887	3.03008e-09	8.51855	3393	217	85	18117	AGRN,TFRC,FASN,AKR1C1,XRCC5,GAPDH,PSMA7,PSMB6,HSP90AB1,HSPD1,NME2,HSP90AA1,PGK1,TALDO1,GSR,ENO1,ATIC,PSMA3,C5,PSMA1,HSPA8,TUBA1B,PRDX1,HSPA1B,XRCC6,ACTN4,PKM,HSP90B1,PSMA5,APP,TFPI,EEF2,YWHAZ,VTN,P4HB,GPC3,GSN,PTPRK,FGG,APOB,APOE,APOM,HSPA5,FN1,CALR,ACTG1,PDIA3,THBS1,LRG1,CLU,APOA1,AHSG,DAG1,SERPINF1,ALB,VASN,TF,PCSK9,AGT,HP,GOT1,PRDX3,CFL1,KRT8,PSME1,PSMB5,PSMA6,KRT18,RPLP0,HSPA9,IGFBP1,SOD1,MIF…
GO:BP	negative regulation of biological process	GO:0048519	3.12882e-09	8.50462	5757	217	119	18117	TFRC,RAN,CTSC,SPTAN1,RPSA,ALDH1A1,XRCC5,GPI,GAPDH,PSMA7,PSMB6,HSP90AB1,HSPD1,NME2,PGK1,FBLN1,RPLP2,ENO1,PSMA3,C5,PSMA1,HSPA8,HSPA1B,XRCC6,ACTN4,CLTC,FGA,HSP90B1,PSMA5,RBP4,APP,YWHAE,TFPI,YWHAZ,VTN,SET,GPC3,SERPINA7,SPTBN1,CDH2,GSN,PTPRK,SERPINA3,FGG,APOE,APOM,C4BPA,SERPIND1,HSPA5,APOA2,C4B,FN1,PROC,F2,SERPINF2,CALR,ITIH2,THBS1,PROS1,C3,A2M,SERPINA5,SDC4,CLU,APOA1,SERPINA6,AHSG,DAG1,SERPINA1,AMBP,…
GO:BP	regulation of hemostasis	GO:1900046	3.38959e-09	8.46985	69	217	13	18117	FGA,TFPI,VTN,FGG,APOE,PROC,F2,SERPINF2,THBS1,PROS1,SERPINC1,APOH,FGB
GO:BP	nitrogen compound metabolic process	GO:0006807	3.76246e-09	8.42453	10078	217	170	18117	AGRN,TFRC,GLUD1,FASN,RAN,UBA1,AHCY,PGAM1,CTSC,RPSA,AKR1C1,XRCC5,GPI,GAPDH,PSMA7,PSMB6,QPRT,HSP90AB1,HSPD1,EEF1G,NME2,IDH1,CTSD,HSP90AA1,PGK1,LDHA,FBLN1,HSPE1,RPLP2,GSR,PDIA4,ENO1,ATIC,PSMA3,PSAT1,C5,PSMA1,HSPA8,CLIC1,ALDOA,HSPA1B,XRCC6,ACTN4,GGH,CLTC,PKM,FGA,HSP90B1,PSMA5,TPI1,APP,YWHAE,BTD,TFPI,EEF2,YWHAZ,PSAP,VTN,CPN1,SET,P4HB,GPC3,SERPINA7,SPTBN1,CDH2,GSN,PTPRK,F10,SERPINA3,FGG,TTR,PAICS,APOB,…
GO:BP	viral process	GO:0016032	4.66129e-09	8.33149	942	217	40	18117	TFRC,RAN,RPSA,XRCC5,PSMA7,PSMB6,HSP90AB1,HSPD1,HSP90AA1,KRT19,FBLN1,RPLP2,PSMA3,HSPA8,HSPA1B,XRCC6,YWHAE,SET,P4HB,GSN,APOE,CFI,APOA2,DAG1,AMBP,CFL1,KRT8,PSMB5,KRT18,SSB,ILF3,RPLP0,CADM1,RPL12,KPNB1,NPM1,ICAM1,CTSB,HNRNPK,PSMB4
GO:BP	negative regulation of coagulation	GO:0050819	4.90945e-09	8.30897	56	217	12	18117	FGA,TFPI,VTN,FGG,APOE,PROC,F2,SERPINF2,THBS1,PROS1,APOH,FGB
GO:BP	regulation of response to external stimulus	GO:0032101	8.63037e-09	8.06397	1051	217	42	18117	CTSC,XRCC5,PSMA7,PSMB6,HSP90AB1,HSPD1,HSP90AA1,PSMA3,C5,PSMA1,XRCC6,FGA,PSMA5,APP,TFPI,VTN,FGG,APOE,PROC,F2,SERPINF2,CALR,THBS1,PROS1,C3,A2M,APOA1,AHSG,SERPINF1,SERPINC1,APOH,AGT,PSME1,PSMB5,PSMA6,CADM1,SOD1,MIF,FGB,SPP1,PGC,PSMB4
GO:BP	regulation of coagulation	GO:0050818	1.04237e-08	7.98198	75	217	13	18117	FGA,TFPI,VTN,FGG,APOE,PROC,F2,SERPINF2,THBS1,PROS1,SERPINC1,APOH,FGB
GO:BP	blood coagulation	GO:0007596	1.04941e-08	7.97906	347	217	24	18117	FBLN1,CLIC1,FGA,TFPI,YWHAZ,VTN,F10,FGG,APOE,SERPIND1,FN1,PROC,F2,SERPINF2,ACTG1,THBS1,PROS1,A2M,SERPINA5,SERPINA1,SERPINC1,APOH,F5,FGB
GO:BP	small molecule metabolic process	GO:0044281	1.17654e-08	7.92939	1921	217	59	18117	GLUD1,ACAT2,FASN,RAN,AHCY,PGAM1,ALDH1A1,AKR1C1,GPI,GAPDH,PSMA7,PSMB6,QPRT,NME2,IDH1,PGK1,LDHA,TALDO1,GSR,ENO1,ATIC,PSMA3,PSAT1,PSMA1,ALDOA,PKM,MDH1,PSMA5,TKT,TPI1,RBP4,APP,BTD,TTR,PAICS,APOB,APOE,APOA2,C3,APOA1,APOC3,AFP,PCSK9,PLTP,GOT1,PSME1,PSMB5,PSMA6,MDH2,SOD1,ECH1,MIF,UGDH,KPNB1,IGF2,FUCA2,PSMB4,ACLY,FH
GO:BP	cellular metabolic process	GO:0044237	1.26471e-08	7.89801	10871	217	177	18117	AGRN,TFRC,GLUD1,ACAT2,FASN,RAN,UBA1,AHCY,PGAM1,CTSC,RPSA,ALDH1A1,AKR1C1,XRCC5,GPI,GAPDH,PSMA7,PSMB6,QPRT,HSP90AB1,HSPD1,EEF1G,NME2,IDH1,CTSD,HSP90AA1,PGK1,LDHA,FBLN1,HSPE1,TALDO1,RPLP2,GSR,PDIA4,ENO1,ATIC,PSMA3,PSAT1,C5,PSMA1,HSPA8,CLIC1,PRDX1,ALDOA,HSPA1B,XRCC6,ACTN4,GGH,CLTC,PKM,MDH1,FGA,HSP90B1,PSMA5,TKT,TPI1,RBP4,APP,YWHAE,BTD,TFPI,EEF2,YWHAZ,PSAP,VTN,CPN1,SET,P4HB,GPC3,SERPINA7,SPTBN1,CDH2,G…
GO:BP	multicellular organismal process	GO:0032501	1.30152e-08	7.88555	7946	217	145	18117	AGRN,TFRC,GLUD1,FASN,CTSC,SPTAN1,ALDH1A1,AKR1C1,XRCC5,GPI,ATRN,GAPDH,PSMA7,PSMB6,HSP90AB1,HSPD1,CLSTN1,NME2,IDH1,HSP90AA1,KRT19,PGK1,LDHA,FBLN1,HSPE1,ENO1,ATIC,PSMA3,C5,PSMA1,CLIC1,PRDX1,ALDOA,HSPA1B,XRCC6,CLTC,PKM,FGA,TPM3,NID1,PSMA5,TPI1,RBP4,APP,YWHAE,BTD,TFPI,EEF2,YWHAZ,PSAP,VTN,P4HB,GPC3,SPTBN1,CDH2,GSN,CLSTN3,FLNB,PTPRK,F10,SERPINA3,FGG,APOB,APOE,APOM,SERPIND1,HSPA5,APOA2,FN1,PROC,F2,SERPIN…
GO:BP	coagulation	GO:0050817	1.60186e-08	7.79538	354	217	24	18117	FBLN1,CLIC1,FGA,TFPI,YWHAZ,VTN,F10,FGG,APOE,SERPIND1,FN1,PROC,F2,SERPINF2,ACTG1,THBS1,PROS1,A2M,SERPINA5,SERPINA1,SERPINC1,APOH,F5,FGB
GO:BP	response to biotic stimulus	GO:0009607	2.12503e-08	7.67263	1626	217	53	18117	XRCC5,GAPDH,PSMA7,PSMB6,HSP90AB1,HSPD1,EEF1G,HSP90AA1,ENO1,PSMA3,C5,PSMA1,PRDX1,XRCC6,TUBB4B,FGA,PSMA5,APP,TUBB,TFPI,GPC3,GSN,APOB,APOE,C4BPA,CFI,HSPA5,C4B,F2,ACTG1,C3,LRG1,A2M,RNASET2,CLU,C2,TF,HP,BPIFB2,PRDX3,CFL1,KRT8,PSME1,PSMB5,PSMA6,ILF3,CADM1,MIF,FGB,FUCA2,ICAM1,PGC,PSMB4
GO:BP	response to other organism	GO:0051707	3.26346e-08	7.48632	1592	217	52	18117	XRCC5,GAPDH,PSMA7,PSMB6,HSP90AB1,HSPD1,EEF1G,HSP90AA1,ENO1,PSMA3,C5,PSMA1,PRDX1,XRCC6,TUBB4B,FGA,PSMA5,APP,TUBB,TFPI,GPC3,GSN,APOB,APOE,C4BPA,CFI,C4B,F2,ACTG1,C3,LRG1,A2M,RNASET2,CLU,C2,TF,HP,BPIFB2,PRDX3,CFL1,KRT8,PSME1,PSMB5,PSMA6,ILF3,CADM1,MIF,FGB,FUCA2,ICAM1,PGC,PSMB4
GO:BP	response to external biotic stimulus	GO:0043207	3.42001e-08	7.46597	1594	217	52	18117	XRCC5,GAPDH,PSMA7,PSMB6,HSP90AB1,HSPD1,EEF1G,HSP90AA1,ENO1,PSMA3,C5,PSMA1,PRDX1,XRCC6,TUBB4B,FGA,PSMA5,APP,TUBB,TFPI,GPC3,GSN,APOB,APOE,C4BPA,CFI,C4B,F2,ACTG1,C3,LRG1,A2M,RNASET2,CLU,C2,TF,HP,BPIFB2,PRDX3,CFL1,KRT8,PSME1,PSMB5,PSMA6,ILF3,CADM1,MIF,FGB,FUCA2,ICAM1,PGC,PSMB4
GO:BP	anatomical structure morphogenesis	GO:0009653	4.02546e-08	7.39518	2797	217	73	18117	AGRN,TFRC,SPTAN1,GPI,ATRN,PSMA7,PSMB6,HSP90AB1,HSP90AA1,KRT19,PGK1,FBLN1,PSMA3,C5,PSMA1,ALDOA,ACTN4,CLTC,PKM,FGA,PSMA5,RBP4,APP,YWHAZ,VTN,P4HB,GPC3,SPTBN1,CDH2,FGG,APOB,APOE,HSPA5,FN1,F2,SERPINF2,CALR,LAMC1,ACTG1,THBS1,CPE,C3,LRG1,SDC4,RELN,CLU,APOA1,DAG1,SERPINF1,APOH,AGT,CFL1,KRT8,PSME1,PSMB5,PSMA6,KRT18,CAP1,ACTN1,FGL1,SOD1,LAMB1,UGDH,DPYSL2,FGB,YBX1,ALCAM,IGF2,SPP1,ICAM1,NCL,PSMB4,DKK1
GO:BP	NAD metabolic process	GO:0019674	4.82224e-08	7.31675	52	217	11	18117	PGAM1,GPI,GAPDH,QPRT,PGK1,LDHA,ENO1,ALDOA,PKM,MDH1,TPI1
GO:BP	regulation of immune system process	GO:0002682	5.82594e-08	7.23463	1617	217	52	18117	TFRC,CTSC,XRCC5,GPI,PSMA7,PSMB6,HSP90AB1,HSPD1,NME2,HSP90AA1,PSMA3,C5,PSMA1,HSPA1B,XRCC6,PSMA5,RBP4,APP,VTN,CPN1,APOE,C4BPA,CFI,APOA2,C4B,F2,CALR,ACTG1,THBS1,PROS1,C3,A2M,SDC4,CLU,APOA1,C2,CPN2,AMBP,ORM2,ORM1,PSME1,PSMB5,PSMA6,FGL1,CADM1,HSPA9,SOD1,MIF,IGF2,ICAM1,PGC,PSMB4
GO:BP	carboxylic acid metabolic process	GO:0019752	6.17407e-08	7.20943	1024	217	40	18117	GLUD1,ACAT2,FASN,AHCY,PGAM1,AKR1C1,GPI,GAPDH,PSMA7,PSMB6,QPRT,IDH1,PGK1,LDHA,ENO1,ATIC,PSMA3,PSAT1,PSMA1,ALDOA,PKM,MDH1,PSMA5,TPI1,APP,BTD,C3,APOA1,APOC3,GOT1,PSME1,PSMB5,PSMA6,MDH2,ECH1,MIF,UGDH,PSMB4,ACLY,FH
GO:BP	developmental process	GO:0032502	7.30525e-08	7.13637	6628	217	127	18117	AGRN,TFRC,GLUD1,FASN,CTSC,SPTAN1,AKR1C1,XRCC5,GPI,ATRN,PSMA7,PSMB6,HSP90AB1,HSPD1,CLSTN1,NME2,IDH1,HSP90AA1,KRT19,PGK1,LDHA,FBLN1,HSPE1,ATIC,PSMA3,C5,PSMA1,CLIC1,PRDX1,ALDOA,HSPA1B,XRCC6,ACTN4,CLTC,PKM,FGA,NID1,PSMA5,TPI1,RBP4,APP,YWHAE,BTD,EEF2,YWHAZ,PSAP,VTN,P4HB,GPC3,SPTBN1,CDH2,GSN,CLSTN3,FLNB,PTPRK,FGG,APOB,APOE,HSPA5,FN1,PROC,F2,SERPINF2,CALR,LAMC1,ACTG1,THBS1,CPE,C3,LRG1,A2M,SERPINA5,SDC4,…
GO:BP	regulation of molecular function	GO:0065009	9.07593e-08	7.04211	3221	217	79	18117	AGRN,TFRC,RAN,ALDH1A1,XRCC5,GPI,GAPDH,HSP90AB1,HSPD1,CTSD,HSP90AA1,FBLN1,HSPE1,PSMA3,C5,HSPA1B,XRCC6,ACTN4,HSP90B1,APP,YWHAE,TFPI,PSAP,VTN,SET,GPC3,SERPINA7,GSN,SERPINA3,APOE,SERPIND1,APOC4-APOC2,APOA2,C4B,FN1,F2,SERPINF2,ITIH2,THBS1,PROS1,C3,A2M,SERPINA5,SDC4,RELN,CLU,APOA1,SERPINA6,AHSG,DAG1,SERPINA1,CPN2,AMBP,SERPINF1,ITIH3,APOC3,SERPINC1,APOH,TF,PCSK9,AGT,HP,PEBP1,PRDX3,PSME1,PSMA6,CAP1,SOD1,…
GO:BP	anatomical structure development	GO:0048856	9.45651e-08	7.02427	6106	217	120	18117	AGRN,TFRC,GLUD1,FASN,CTSC,SPTAN1,AKR1C1,XRCC5,GPI,ATRN,PSMA7,PSMB6,HSP90AB1,HSPD1,CLSTN1,NME2,IDH1,HSP90AA1,KRT19,PGK1,LDHA,FBLN1,ATIC,PSMA3,C5,PSMA1,PRDX1,ALDOA,HSPA1B,XRCC6,ACTN4,CLTC,PKM,FGA,NID1,PSMA5,TPI1,RBP4,APP,YWHAE,BTD,EEF2,YWHAZ,PSAP,VTN,P4HB,GPC3,SPTBN1,CDH2,GSN,CLSTN3,FLNB,PTPRK,FGG,APOB,APOE,HSPA5,FN1,PROC,F2,SERPINF2,CALR,LAMC1,ACTG1,THBS1,CPE,C3,LRG1,SERPINA5,SDC4,RELN,CLU,APOA1,A…
GO:BP	negative regulation of cellular process	GO:0048523	9.87799e-08	7.00533	5139	217	107	18117	TFRC,CTSC,SPTAN1,XRCC5,GPI,GAPDH,PSMA7,PSMB6,HSP90AB1,HSPD1,NME2,FBLN1,ENO1,PSMA3,C5,PSMA1,HSPA8,HSPA1B,XRCC6,ACTN4,CLTC,FGA,HSP90B1,PSMA5,RBP4,APP,YWHAE,TFPI,YWHAZ,VTN,SET,GPC3,SERPINA7,SPTBN1,CDH2,GSN,PTPRK,SERPINA3,FGG,APOE,APOM,SERPIND1,HSPA5,APOA2,C4B,PROC,F2,SERPINF2,CALR,ITIH2,THBS1,PROS1,C3,A2M,SERPINA5,SDC4,CLU,APOA1,SERPINA6,AHSG,DAG1,SERPINA1,AMBP,SERPINF1,ITIH3,APOC3,NOTUM,SERPINC1,AL…
GO:BP	catabolic process	GO:0009056	1.31218e-07	6.88201	2744	217	71	18117	AGRN,GLUD1,ACAT2,UBA1,AHCY,PGAM1,CTSC,RPSA,ALDH1A1,GPI,GAPDH,PSMA7,PSMB6,QPRT,HSP90AB1,IDH1,CTSD,HSP90AA1,PGK1,LDHA,RPLP2,ENO1,PSMA3,PSMA1,HSPA8,PRDX1,ALDOA,HSPA1B,CLTC,PKM,HSP90B1,PSMA5,TPI1,APP,YWHAZ,PSAP,CPN1,SET,GPC3,APOB,APOE,C4BPA,HSPA5,APOA2,SDC4,RNASET2,CLU,APOA1,AMBP,APOC3,NOTUM,PCSK9,HP,GOT1,PRDX3,PSME1,PSMB5,PSMA6,SSB,RPLP0,RPL12,ECH1,YBX1,KPNB1,HNRNPC,SPP1,NPM1,FUCA2,CTSB,PSMB4,VCAN
GO:BP	oxoacid metabolic process	GO:0043436	1.61407e-07	6.79208	1057	217	40	18117	GLUD1,ACAT2,FASN,AHCY,PGAM1,AKR1C1,GPI,GAPDH,PSMA7,PSMB6,QPRT,IDH1,PGK1,LDHA,ENO1,ATIC,PSMA3,PSAT1,PSMA1,ALDOA,PKM,MDH1,PSMA5,TPI1,APP,BTD,C3,APOA1,APOC3,GOT1,PSME1,PSMB5,PSMA6,MDH2,ECH1,MIF,UGDH,PSMB4,ACLY,FH
GO:BP	negative regulation of response to wounding	GO:1903035	1.76862e-07	6.75237	93	217	13	18117	FGA,TFPI,VTN,FGG,APOE,PROC,F2,SERPINF2,THBS1,PROS1,APOH,FGB,SPP1
GO:BP	positive regulation of immune system process	GO:0002684	2.02477e-07	6.69362	1065	217	40	18117	TFRC,CTSC,XRCC5,GPI,PSMA7,PSMB6,HSP90AB1,HSPD1,HSP90AA1,PSMA3,C5,PSMA1,XRCC6,PSMA5,RBP4,APP,VTN,CPN1,C4BPA,CFI,C4B,F2,CALR,ACTG1,THBS1,PROS1,C3,A2M,CLU,C2,CPN2,PSME1,PSMB5,PSMA6,CADM1,MIF,IGF2,ICAM1,PGC,PSMB4
GO:BP	cellular response to organic substance	GO:0071310	2.24207e-07	6.64935	2776	217	71	18117	TFRC,FASN,AKR1C1,XRCC5,GAPDH,PSMA7,PSMB6,HSP90AB1,HSPD1,NME2,HSP90AA1,TALDO1,ATIC,PSMA3,PSMA1,HSPA8,TUBA1B,HSPA1B,ACTN4,PKM,HSP90B1,PSMA5,APP,TFPI,EEF2,YWHAZ,VTN,P4HB,GPC3,GSN,PTPRK,FGG,APOB,HSPA5,FN1,CALR,ACTG1,PDIA3,THBS1,LRG1,CLU,APOA1,AHSG,DAG1,SERPINF1,VASN,PCSK9,AGT,GOT1,CFL1,KRT8,PSME1,PSMB5,PSMA6,KRT18,RPLP0,HSPA9,IGFBP1,SOD1,MIF,FGB,CRLF1,IGF2,SPP1,NPM1,ICAM1,CTSB,NCL,LMNB1,LMNA,PSMB4
GO:BP	negative regulation of metabolic process	GO:0009892	2.42409e-07	6.61545	3479	217	82	18117	RAN,RPSA,ALDH1A1,XRCC5,GPI,GAPDH,PSMA7,PSMB6,HSP90AB1,HSPD1,FBLN1,RPLP2,ENO1,PSMA3,C5,PSMA1,HSPA8,HSPA1B,XRCC6,CLTC,PSMA5,APP,YWHAE,TFPI,YWHAZ,VTN,SET,GPC3,SERPINA7,PTPRK,SERPINA3,APOE,SERPIND1,APOA2,C4B,FN1,F2,SERPINF2,CALR,ITIH2,THBS1,PROS1,C3,A2M,SERPINA5,CLU,APOA1,SERPINA6,AHSG,SERPINA1,AMBP,SERPINF1,ITIH3,APOC3,SERPINC1,ORM1,PCSK9,AGT,HP,GOT1,PEBP1,PRDX3,PSME1,PSMB5,PSMA6,SSB,ILF3,RPLP0,SOD1…
GO:BP	plasma lipoprotein particle remodeling	GO:0034369	2.80822e-07	6.55157	33	217	9	18117	APOB,APOE,APOM,APOA2,APOA1,APOC3,ALB,AGT,PLTP
GO:BP	protein-lipid complex remodeling	GO:0034368	2.80822e-07	6.55157	33	217	9	18117	APOB,APOE,APOM,APOA2,APOA1,APOC3,ALB,AGT,PLTP
GO:BP	NADH metabolic process	GO:0006734	3.00397e-07	6.5223	46	217	10	18117	PGAM1,GPI,GAPDH,PGK1,ENO1,ALDOA,PKM,MDH1,TPI1,MDH2
GO:BP	negative regulation of wound healing	GO:0061045	3.03104e-07	6.51841	78	217	12	18117	FGA,TFPI,VTN,FGG,APOE,PROC,F2,SERPINF2,THBS1,PROS1,APOH,FGB
GO:BP	proteasomal ubiquitin-independent protein catabolic process	GO:0010499	3.4005e-07	6.46846	23	217	8	18117	PSMA7,PSMB6,PSMA3,PSMA1,PSMA5,PSMB5,PSMA6,PSMB4
GO:BP	monosaccharide biosynthetic process	GO:0046364	3.47417e-07	6.45915	98	217	13	18117	PGAM1,GPI,GAPDH,PGK1,TALDO1,ENO1,ALDOA,MDH1,TKT,TPI1,RBP4,GOT1,MDH2
GO:BP	regulation of anatomical structure morphogenesis	GO:0022603	4.01145e-07	6.3967	1042	217	39	18117	TFRC,PSMA7,PSMB6,PGK1,FBLN1,PSMA3,C5,PSMA1,ALDOA,ACTN4,CLTC,PKM,FGA,PSMA5,P4HB,GPC3,CDH2,FGG,FN1,F2,CALR,THBS1,C3,LRG1,RELN,APOA1,DAG1,SERPINF1,APOH,AGT,CFL1,PSME1,PSMB5,PSMA6,FGB,SPP1,ICAM1,PSMB4,DKK1
GO:BP	organic acid metabolic process	GO:0006082	4.05012e-07	6.39253	1090	217	40	18117	GLUD1,ACAT2,FASN,AHCY,PGAM1,AKR1C1,GPI,GAPDH,PSMA7,PSMB6,QPRT,IDH1,PGK1,LDHA,ENO1,ATIC,PSMA3,PSAT1,PSMA1,ALDOA,PKM,MDH1,PSMA5,TPI1,APP,BTD,C3,APOA1,APOC3,GOT1,PSME1,PSMB5,PSMA6,MDH2,ECH1,MIF,UGDH,PSMB4,ACLY,FH
GO:BP	protein-containing complex remodeling	GO:0034367	5.03561e-07	6.29795	35	217	9	18117	APOB,APOE,APOM,APOA2,APOA1,APOC3,ALB,AGT,PLTP
GO:BP	plasminogen activation	GO:0031639	5.04849e-07	6.29684	24	217	8	18117	PGK1,ENO1,FGA,FGG,SERPINF2,THBS1,APOH,FGB
GO:BP	system development	GO:0048731	5.06803e-07	6.29516	5052	217	104	18117	AGRN,TFRC,GLUD1,FASN,CTSC,SPTAN1,XRCC5,ATRN,PSMA7,PSMB6,HSP90AB1,HSPD1,CLSTN1,NME2,IDH1,HSP90AA1,KRT19,PGK1,LDHA,ATIC,PSMA3,C5,PSMA1,PRDX1,HSPA1B,XRCC6,CLTC,PKM,NID1,PSMA5,RBP4,APP,YWHAE,BTD,EEF2,YWHAZ,PSAP,GPC3,SPTBN1,CDH2,GSN,CLSTN3,FLNB,PTPRK,APOB,APOE,HSPA5,FN1,F2,SERPINF2,CALR,LAMC1,ACTG1,THBS1,CPE,C3,LRG1,SERPINA5,SDC4,RELN,CLU,APOA1,AHSG,MATN3,DAG1,KRT10,SERPINF1,AFP,SERPINC1,VASN,APOH,TF,…
GO:BP	endocytosis	GO:0006897	6.00851e-07	6.22123	696	217	31	18117	TFRC,HSP90AA1,CLTC,HSP90B1,APP,VTN,GPC3,GSN,APOB,APOE,C4BPA,CFI,C4B,CALR,ACTG1,THBS1,C3,LGALS3BP,CLU,APOA1,AHSG,AMBP,APOC3,ALB,TF,PCSK9,HP,CAP1,DPYSL2,HNRNPK,DKK1
GO:BP	cellular developmental process	GO:0048869	6.29407e-07	6.20107	4428	217	95	18117	AGRN,TFRC,FASN,SPTAN1,AKR1C1,XRCC5,ATRN,PSMA7,PSMB6,HSP90AB1,NME2,HSP90AA1,KRT19,PGK1,FBLN1,HSPE1,PSMA3,PSMA1,CLIC1,HSPA1B,XRCC6,ACTN4,CLTC,FGA,PSMA5,APP,EEF2,YWHAZ,PSAP,VTN,P4HB,GPC3,SPTBN1,CDH2,GSN,FLNB,PTPRK,FGG,APOB,APOE,HSPA5,FN1,PROC,F2,SERPINF2,CALR,LAMC1,ACTG1,THBS1,C3,LRG1,A2M,SDC4,RELN,CLU,APOA1,DAG1,KRT10,SERPINF1,VASN,TF,PCSK9,AGT,KRT9,GOT1,PRDX3,CFL1,KRT8,PSME1,PSMB5,PSMA6,KRT18,ACTN…
GO:BP	acute-phase response	GO:0006953	7.26056e-07	6.13903	50	217	10	18117	SERPINA3,FN1,F2,SERPINF2,AHSG,SERPINA1,ORM2,SAA4,ORM1,HP
GO:BP	response to abiotic stimulus	GO:0009628	7.46839e-07	6.12677	1261	217	43	18117	AHCY,XRCC5,GPI,PSMA7,PSMB6,HSP90AB1,HSPD1,HSP90AA1,PGK1,LDHA,ENO1,PSMA3,PSMA1,HSPA8,HSPA1B,XRCC6,ACTN4,PKM,HSP90B1,PSMA5,APP,YWHAE,P4HB,CDH2,GSN,PTPRK,HSPA5,ACTG1,THBS1,DAG1,SERPINF1,VASN,AGT,GOT1,KRT8,PSME1,PSMB5,PSMA6,SOD1,NPM1,ICAM1,LMNA,PSMB4
GO:BP	regulation of developmental process	GO:0050793	7.63157e-07	6.11739	2605	217	67	18117	AGRN,TFRC,CTSC,XRCC5,ATRN,PSMA7,PSMB6,HSP90AB1,CLSTN1,NME2,PGK1,FBLN1,PSMA3,C5,PSMA1,CLIC1,ALDOA,HSPA1B,XRCC6,ACTN4,CLTC,PKM,FGA,PSMA5,RBP4,APP,YWHAZ,P4HB,GPC3,CDH2,CLSTN3,FGG,APOB,APOE,FN1,PROC,F2,SERPINF2,CALR,THBS1,C3,LRG1,RELN,APOA1,AHSG,DAG1,KRT10,SERPINF1,VASN,APOH,AGT,CFL1,PSME1,PSMB5,PSMA6,HSPA9,SOD1,MIF,DPYSL2,FGB,YBX1,IGF2,SPP1,ICAM1,LMNA,PSMB4,DKK1
GO:BP	multicellular organism development	GO:0007275	8.69941e-07	6.06051	5613	217	111	18117	AGRN,TFRC,GLUD1,FASN,CTSC,SPTAN1,XRCC5,GPI,ATRN,PSMA7,PSMB6,HSP90AB1,HSPD1,CLSTN1,NME2,IDH1,HSP90AA1,KRT19,PGK1,LDHA,FBLN1,ATIC,PSMA3,C5,PSMA1,PRDX1,HSPA1B,XRCC6,CLTC,PKM,NID1,PSMA5,TPI1,RBP4,APP,YWHAE,BTD,EEF2,YWHAZ,PSAP,VTN,GPC3,SPTBN1,CDH2,GSN,CLSTN3,FLNB,PTPRK,APOB,APOE,HSPA5,FN1,PROC,F2,SERPINF2,CALR,LAMC1,ACTG1,THBS1,CPE,C3,LRG1,SERPINA5,SDC4,RELN,CLU,APOA1,AHSG,MATN3,DAG1,KRT10,SERPINF1,AF…
GO:BP	fibrinolysis	GO:0042730	1.05053e-06	5.97859	26	217	8	18117	FGA,FGG,F2,SERPINF2,THBS1,PROS1,APOH,FGB
GO:BP	retinoid metabolic process	GO:0001523	1.06535e-06	5.97251	107	217	13	18117	AGRN,ALDH1A1,AKR1C1,RBP4,GPC3,TTR,APOB,APOE,APOM,APOA2,SDC4,APOA1,APOC3
GO:BP	regulation of plasma lipoprotein particle levels	GO:0097006	1.06535e-06	5.97251	107	217	13	18117	CLTC,P4HB,APOB,APOE,APOM,APOA2,APOA1,APOC3,ALB,PCSK9,AGT,PLTP,HNRNPK
GO:BP	plasma lipoprotein particle organization	GO:0071827	1.09509e-06	5.96055	52	217	10	18117	P4HB,APOB,APOE,APOM,APOA2,APOA1,APOC3,ALB,AGT,PLTP
GO:BP	wound healing	GO:0042060	1.114e-06	5.95311	549	217	27	18117	FBLN1,CLIC1,FGA,TFPI,YWHAZ,VTN,GSN,F10,FGG,APOE,SERPIND1,FN1,PROC,F2,SERPINF2,ACTG1,THBS1,PROS1,A2M,SERPINA5,SDC4,DAG1,SERPINA1,SERPINC1,APOH,F5,FGB
GO:BP	response to wounding	GO:0009611	1.22208e-06	5.9129	674	217	30	18117	FBLN1,CLIC1,FGA,TFPI,YWHAZ,VTN,GSN,F10,FGG,APOE,SERPIND1,FN1,PROC,F2,SERPINF2,ACTG1,THBS1,PROS1,A2M,SERPINA5,SDC4,APOA1,DAG1,SERPINA1,SERPINC1,APOH,F5,SOD1,FGB,SPP1
GO:BP	response to hypoxia	GO:0001666	1.32079e-06	5.87917	367	217	22	18117	AHCY,PSMA7,PSMB6,HSPD1,PGK1,LDHA,ENO1,PSMA3,PSMA1,ACTN4,PKM,HSP90B1,PSMA5,P4HB,THBS1,VASN,PSME1,PSMB5,PSMA6,ICAM1,LMNA,PSMB4
GO:BP	glucose catabolic process to pyruvate	GO:0061718	1.47757e-06	5.83045	27	217	8	18117	PGAM1,GPI,GAPDH,PGK1,ENO1,ALDOA,PKM,TPI1
GO:BP	NADH regeneration	GO:0006735	1.47757e-06	5.83045	27	217	8	18117	PGAM1,GPI,GAPDH,PGK1,ENO1,ALDOA,PKM,TPI1
GO:BP	canonical glycolysis	GO:0061621	1.47757e-06	5.83045	27	217	8	18117	PGAM1,GPI,GAPDH,PGK1,ENO1,ALDOA,PKM,TPI1
GO:BP	regulation of complement activation	GO:0030449	1.51103e-06	5.82073	110	217	13	18117	C5,VTN,CPN1,C4BPA,CFI,C4B,F2,PROS1,C3,A2M,CLU,C2,CPN2
GO:BP	regulation of humoral immune response	GO:0002920	1.55808e-06	5.80741	133	217	14	18117	C5,VTN,CPN1,C4BPA,CFI,C4B,F2,PROS1,C3,A2M,CLU,C2,CPN2,PGC
GO:BP	macromolecule localization	GO:0033036	1.60968e-06	5.79326	3218	217	76	18117	AGRN,TFRC,GLUD1,RAN,RPSA,AKR1C1,HSPA4,XRCC5,HSP90AB1,HSPD1,CLSTN1,IDH1,CTSD,HSP90AA1,RPLP2,PDIA4,HSPA8,ACTN4,CLTC,FGA,HSP90B1,RBP4,YWHAE,YWHAZ,PSAP,GPC3,SPTBN1,CDH2,GSN,CLSTN3,PTPRK,FGG,APOB,APOE,APOM,APOC4-APOC2,HSPA5,APOA2,F2,CALR,ACTG1,THBS1,CPE,C3,SERPINA5,RELN,CLU,APOA1,DAG1,APOC3,APOH,TF,AZGP1,PCSK9,AGT,PLTP,KRT18,SSB,RPLP0,HSPA9,RPL12,ECH1,DPYSL2,CUTA,FGB,YBX1,CCT8,KPNB1,CCT3,NASP,SPP1,NPM…
GO:BP	high-density lipoprotein particle remodeling	GO:0034375	1.98595e-06	5.70203	18	217	7	18117	APOE,APOM,APOA2,APOA1,APOC3,ALB,PLTP
GO:BP	glycolytic process through glucose-6-phosphate	GO:0061620	2.04741e-06	5.6888	28	217	8	18117	PGAM1,GPI,GAPDH,PGK1,ENO1,ALDOA,PKM,TPI1
GO:BP	regulation of wound healing	GO:0061041	2.09668e-06	5.67847	136	217	14	18117	FGA,TFPI,VTN,FGG,APOE,PROC,F2,SERPINF2,ACTG1,THBS1,PROS1,SERPINC1,APOH,FGB
GO:BP	diterpenoid metabolic process	GO:0016101	2.12001e-06	5.67366	113	217	13	18117	AGRN,ALDH1A1,AKR1C1,RBP4,GPC3,TTR,APOB,APOE,APOM,APOA2,SDC4,APOA1,APOC3
GO:BP	negative regulation of macromolecule metabolic process	GO:0010605	2.24857e-06	5.64809	3241	217	76	18117	RAN,RPSA,XRCC5,GPI,GAPDH,PSMA7,PSMB6,HSP90AB1,FBLN1,RPLP2,ENO1,PSMA3,C5,PSMA1,HSPA8,HSPA1B,XRCC6,CLTC,PSMA5,APP,YWHAE,TFPI,YWHAZ,VTN,SET,GPC3,SERPINA7,PTPRK,SERPINA3,APOE,SERPIND1,APOA2,C4B,FN1,F2,SERPINF2,CALR,ITIH2,THBS1,PROS1,C3,A2M,SERPINA5,CLU,APOA1,SERPINA6,AHSG,SERPINA1,AMBP,SERPINF1,ITIH3,SERPINC1,ORM1,PCSK9,AGT,PEBP1,PRDX3,PSME1,PSMB5,PSMA6,SSB,ILF3,RPLP0,RPL12,MIF,SERPINA11,YBX1,APLP2,I…
GO:BP	activation of immune response	GO:0002253	2.34284e-06	5.63026	568	217	27	18117	XRCC5,PSMA7,PSMB6,HSP90AB1,HSP90AA1,PSMA3,C5,PSMA1,XRCC6,PSMA5,VTN,CPN1,C4BPA,CFI,C4B,F2,ACTG1,PROS1,C3,A2M,CLU,C2,CPN2,PSME1,PSMB5,PSMA6,PSMB4
GO:BP	protein-lipid complex subunit organization	GO:0071825	2.36409e-06	5.62634	56	217	10	18117	P4HB,APOB,APOE,APOM,APOA2,APOA1,APOC3,ALB,AGT,PLTP
GO:BP	acute inflammatory response	GO:0002526	2.36786e-06	5.62564	114	217	13	18117	SERPINA3,FN1,F2,SERPINF2,C3,AHSG,SERPINA1,ORM2,SAA4,SERPINC1,ORM1,HP,ICAM1
GO:BP	positive regulation of gene expression	GO:0010628	2.51642e-06	5.59922	1160	217	40	18117	TFRC,XRCC5,GPI,GAPDH,HSPD1,HSP90AA1,FBLN1,ENO1,C5,HSPA8,HSPA1B,XRCC6,PKM,RBP4,APP,EEF2,SPTBN1,GSN,APOB,APOA2,FN1,SERPINF2,CALR,ACTG1,THBS1,C3,CLU,ORM2,ORM1,AGT,CADM1,SOD1,MIF,YBX1,HNRNPC,NPM1,NCL,PGC,LMNA,DKK1
GO:BP	chylomicron assembly	GO:0034378	2.63282e-06	5.57958	11	217	6	18117	P4HB,APOB,APOE,APOA2,APOA1,APOC3
GO:BP	response to decreased oxygen levels	GO:0036293	2.79595e-06	5.55347	382	217	22	18117	AHCY,PSMA7,PSMB6,HSPD1,PGK1,LDHA,ENO1,PSMA3,PSMA1,ACTN4,PKM,HSP90B1,PSMA5,P4HB,THBS1,VASN,PSME1,PSMB5,PSMA6,ICAM1,LMNA,PSMB4
GO:BP	glycolytic process through fructose-6-phosphate	GO:0061615	2.79841e-06	5.55309	29	217	8	18117	PGAM1,GPI,GAPDH,PGK1,ENO1,ALDOA,PKM,TPI1
GO:BP	antigen processing and presentation of exogenous peptide antigen via MHC class I, TAP-dependent	GO:0002479	3.07357e-06	5.51236	75	217	11	18117	PSMA7,PSMB6,PSMA3,PSMA1,PSMA5,CALR,PDIA3,PSME1,PSMB5,PSMA6,PSMB4
GO:BP	negative regulation of molecular function	GO:0044092	3.12878e-06	5.50462	1219	217	41	18117	GPI,GAPDH,C5,APP,YWHAE,TFPI,VTN,SET,GPC3,SERPINA7,SERPINA3,APOE,SERPIND1,APOA2,C4B,SERPINF2,ITIH2,THBS1,PROS1,C3,A2M,SERPINA5,APOA1,SERPINA6,AHSG,SERPINA1,AMBP,SERPINF1,ITIH3,APOC3,SERPINC1,PCSK9,AGT,HP,PEBP1,PRDX3,SERPINA11,APLP2,NPM1,SERPINA4,DKK1
GO:BP	cell differentiation	GO:0030154	3.36022e-06	5.47363	4350	217	92	18117	AGRN,TFRC,FASN,SPTAN1,AKR1C1,XRCC5,ATRN,PSMA7,PSMB6,HSP90AB1,NME2,HSP90AA1,KRT19,PGK1,FBLN1,HSPE1,PSMA3,PSMA1,CLIC1,HSPA1B,XRCC6,ACTN4,CLTC,FGA,PSMA5,APP,EEF2,YWHAZ,PSAP,VTN,P4HB,GPC3,SPTBN1,CDH2,GSN,FLNB,PTPRK,FGG,APOB,APOE,HSPA5,FN1,PROC,F2,SERPINF2,CALR,LAMC1,ACTG1,THBS1,C3,LRG1,A2M,SDC4,RELN,CLU,APOA1,DAG1,KRT10,SERPINF1,VASN,TF,PCSK9,AGT,KRT9,GOT1,PRDX3,CFL1,KRT8,PSME1,PSMB5,PSMA6,KRT18,ACTN…
GO:BP	small molecule biosynthetic process	GO:0044283	3.40577e-06	5.46779	704	217	30	18117	GLUD1,ACAT2,FASN,RAN,PGAM1,GPI,GAPDH,NME2,PGK1,TALDO1,ENO1,PSAT1,ALDOA,PKM,MDH1,TKT,TPI1,RBP4,APOB,APOE,APOA1,APOC3,PLTP,GOT1,MDH2,SOD1,MIF,UGDH,KPNB1,ACLY
GO:BP	inflammatory response	GO:0006954	3.6124e-06	5.4422	794	217	32	18117	AHCY,CTSC,ATRN,HSPD1,C5,PSMA1,APP,SERPINA3,APOE,C4B,FN1,PROC,F2,SERPINF2,THBS1,C3,APOA1,AHSG,SERPINA1,SERPINF1,ORM2,SAA4,SERPINC1,ORM1,AGT,HP,PSMA6,SOD1,MIF,SPP1,ICAM1,PSMB4
GO:BP	MAPK cascade	GO:0000165	3.94983e-06	5.40342	935	217	35	18117	SPTAN1,PSMA7,PSMB6,FBLN1,PSMA3,C5,PSMA1,PRDX1,FGA,PSMA5,APP,YWHAE,YWHAZ,SPTBN1,CDH2,FGG,APOE,FN1,SERPINF2,THBS1,DAG1,AMBP,TF,AGT,PEBP1,PSME1,PSMB5,PSMA6,SOD1,MIF,FGB,IGF2,ICAM1,PSMB4,DKK1
GO:BP	positive regulation of immune response	GO:0050778	4.0367e-06	5.39397	753	217	31	18117	TFRC,XRCC5,PSMA7,PSMB6,HSP90AB1,HSPD1,HSP90AA1,PSMA3,C5,PSMA1,XRCC6,PSMA5,VTN,CPN1,C4BPA,CFI,C4B,F2,ACTG1,PROS1,C3,A2M,CLU,C2,CPN2,PSME1,PSMB5,PSMA6,CADM1,PGC,PSMB4
GO:BP	protein folding	GO:0006457	4.08352e-06	5.38897	225	217	17	18117	HSP90AB1,HSPD1,HSP90AA1,HSPE1,PDIA4,HSPA8,HSPA1B,HSP90B1,P4HB,HSPA5,CALR,PDIA3,CLU,HSPA9,CCT8,CCT3,PRKCSH
GO:BP	positive regulation of biological process	GO:0048518	4.11372e-06	5.38577	6363	217	119	18117	AGRN,TFRC,GLUD1,FASN,RAN,CTSC,XRCC5,GPI,GAPDH,PSMA7,PSMB6,HSP90AB1,HSPD1,CLSTN1,NME2,CTSD,HSP90AA1,PGK1,LDHA,FBLN1,HSPE1,ENO1,PSMA3,C5,PSMA1,HSPA8,CLIC1,HSPA1B,XRCC6,ACTN4,PKM,FGA,NID1,PSMA5,RBP4,APP,YWHAE,EEF2,YWHAZ,VTN,CPN1,P4HB,GPC3,SPTBN1,CDH2,GSN,CLSTN3,F10,FGG,APOB,APOE,C4BPA,CFI,HSPA5,APOA2,C4B,FN1,PROC,F2,SERPINF2,CALR,LAMC1,ACTG1,PDIA3,THBS1,PROS1,C3,LRG1,A2M,SDC4,RELN,CLU,APOA1,C2,AHSG,…
GO:BP	regulation of response to wounding	GO:1903034	4.1735e-06	5.3795	169	217	15	18117	FGA,TFPI,VTN,FGG,APOE,PROC,F2,SERPINF2,ACTG1,THBS1,PROS1,SERPINC1,APOH,FGB,SPP1
GO:BP	regulation of apoptotic process	GO:0042981	4.49319e-06	5.34744	1549	217	47	18117	TFRC,CTSC,GPI,HSP90AB1,HSPD1,NME2,CTSD,HSP90AA1,LDHA,ENO1,HSPA1B,ACTN4,FGA,HSP90B1,YWHAE,YWHAZ,SET,P4HB,GSN,FGG,APOE,HSPA5,PROC,CALR,PDIA3,THBS1,CLU,ALB,APOH,PCSK9,AGT,PRDX3,CFL1,KRT18,ACTN1,HSPA9,SOD1,MIF,DHRS2,FGB,CRLF1,NPM1,ICAM1,CTSB,HNRNPK,LMNA,DKK1
GO:BP	cellular protein modification process	GO:0006464	5.41257e-06	5.2666	4041	217	87	18117	TFRC,UBA1,XRCC5,GAPDH,PSMA7,PSMB6,HSP90AB1,NME2,HSP90AA1,FBLN1,PDIA4,PSMA3,C5,PSMA1,HSPA1B,XRCC6,FGA,HSP90B1,PSMA5,APP,YWHAE,YWHAZ,VTN,SET,P4HB,GPC3,SPTBN1,CDH2,PTPRK,FGG,APOB,APOE,SERPIND1,HSPA5,APOA2,FN1,PROC,F2,LAMC1,PDIA3,ITIH2,THBS1,CPE,C3,SDC4,RELN,CLU,APOA1,AHSG,MATN3,DAG1,SERPINA1,KRT10,AMBP,AFP,NOTUM,SERPINC1,ALB,TF,PCSK9,AGT,F5,BPIFB2,CP,PRDX3,PSME1,PSMB5,PSMA6,ILF3,IGFBP1,SOD1,MIF,LAMB…
GO:BP	protein modification process	GO:0036211	5.41257e-06	5.2666	4041	217	87	18117	TFRC,UBA1,XRCC5,GAPDH,PSMA7,PSMB6,HSP90AB1,NME2,HSP90AA1,FBLN1,PDIA4,PSMA3,C5,PSMA1,HSPA1B,XRCC6,FGA,HSP90B1,PSMA5,APP,YWHAE,YWHAZ,VTN,SET,P4HB,GPC3,SPTBN1,CDH2,PTPRK,FGG,APOB,APOE,SERPIND1,HSPA5,APOA2,FN1,PROC,F2,LAMC1,PDIA3,ITIH2,THBS1,CPE,C3,SDC4,RELN,CLU,APOA1,AHSG,MATN3,DAG1,SERPINA1,KRT10,AMBP,AFP,NOTUM,SERPINC1,ALB,TF,PCSK9,AGT,F5,BPIFB2,CP,PRDX3,PSME1,PSMB5,PSMA6,ILF3,IGFBP1,SOD1,MIF,LAMB…
GO:BP	regulation of multicellular organismal process	GO:0051239	6.07991e-06	5.2161	2861	217	69	18117	AGRN,TFRC,CTSC,ALDH1A1,XRCC5,GPI,ATRN,GAPDH,HSP90AB1,HSPD1,CLSTN1,NME2,HSP90AA1,PGK1,FBLN1,ENO1,C5,HSPA1B,XRCC6,PKM,FGA,RBP4,APP,YWHAE,TFPI,VTN,SPTBN1,CLSTN3,FGG,APOE,APOM,APOA2,FN1,PROC,F2,SERPINF2,CALR,THBS1,PROS1,C3,LRG1,RELN,CLU,APOA1,AHSG,DAG1,SERPINF1,APOC3,ORM2,SERPINC1,VASN,ORM1,APOH,TF,PCSK9,AGT,CFL1,CADM1,HSPA9,SOD1,MIF,FGB,IGF2,SPP1,ICAM1,HNRNPK,LMNA,FH,DKK1
GO:BP	terpenoid metabolic process	GO:0006721	6.10495e-06	5.21432	123	217	13	18117	AGRN,ALDH1A1,AKR1C1,RBP4,GPC3,TTR,APOB,APOE,APOM,APOA2,SDC4,APOA1,APOC3
GO:BP	antigen processing and presentation of exogenous peptide antigen via MHC class I	GO:0042590	6.23941e-06	5.20486	80	217	11	18117	PSMA7,PSMB6,PSMA3,PSMA1,PSMA5,CALR,PDIA3,PSME1,PSMB5,PSMA6,PSMB4
GO:BP	regulation of body fluid levels	GO:0050878	6.42426e-06	5.19218	514	217	25	18117	GPI,FBLN1,CLIC1,FGA,TFPI,YWHAZ,VTN,F10,FGG,APOE,SERPIND1,FN1,PROC,F2,SERPINF2,ACTG1,THBS1,PROS1,A2M,SERPINA5,SERPINA1,SERPINC1,APOH,F5,FGB
GO:BP	regulation of biological process	GO:0050789	6.9889e-06	5.15559	12091	217	183	18117	AGRN,TFRC,GLUD1,FASN,RAN,PGAM1,CTSC,SPTAN1,RPSA,ALDH1A1,XRCC5,GPI,ATRN,GAPDH,PSMA7,PSMB6,HSP90AB1,HSPD1,CLSTN1,NME2,IDH1,CTSD,HSP90AA1,KRT19,PGK1,LDHA,FBLN1,HSPE1,TALDO1,RPLP2,GSR,PDIA4,ENO1,PSMA3,C5,PSMA1,HSPA8,CLIC1,PRDX1,ALDOA,HSPA1B,XRCC6,ACTN4,CLTC,TUBB4B,PKM,FGA,HSP90B1,NID1,PSMA5,TKT,RBP4,APP,TUBB,YWHAE,TFPI,EEF2,YWHAZ,PSAP,VTN,CPN1,SET,P4HB,GPC3,SERPINA7,SPTBN1,CDH2,GSN,CLSTN3,FLNB,PTPRK,…
GO:BP	receptor-mediated endocytosis	GO:0006898	8.02753e-06	5.09542	333	217	20	18117	TFRC,HSP90AA1,CLTC,HSP90B1,VTN,APOB,APOE,CALR,C3,CLU,APOA1,AMBP,APOC3,ALB,TF,PCSK9,HP,CAP1,HNRNPK,DKK1
GO:BP	regulation of programmed cell death	GO:0043067	8.83481e-06	5.0538	1582	217	47	18117	TFRC,CTSC,GPI,HSP90AB1,HSPD1,NME2,CTSD,HSP90AA1,LDHA,ENO1,HSPA1B,ACTN4,FGA,HSP90B1,YWHAE,YWHAZ,SET,P4HB,GSN,FGG,APOE,HSPA5,PROC,CALR,PDIA3,THBS1,CLU,ALB,APOH,PCSK9,AGT,PRDX3,CFL1,KRT18,ACTN1,HSPA9,SOD1,MIF,DHRS2,FGB,CRLF1,NPM1,ICAM1,CTSB,HNRNPK,LMNA,DKK1
GO:BP	response to oxygen levels	GO:0070482	9.43496e-06	5.02526	408	217	22	18117	AHCY,PSMA7,PSMB6,HSPD1,PGK1,LDHA,ENO1,PSMA3,PSMA1,ACTN4,PKM,HSP90B1,PSMA5,P4HB,THBS1,VASN,PSME1,PSMB5,PSMA6,ICAM1,LMNA,PSMB4
GO:BP	negative regulation of apoptotic process	GO:0043066	9.88516e-06	5.00502	921	217	34	18117	TFRC,GPI,HSP90AB1,HSPD1,NME2,ENO1,HSPA1B,FGA,HSP90B1,YWHAE,YWHAZ,SET,FGG,APOE,HSPA5,PROC,THBS1,CLU,ALB,APOH,PRDX3,CFL1,KRT18,HSPA9,SOD1,MIF,DHRS2,FGB,CRLF1,NPM1,ICAM1,HNRNPK,LMNA,DKK1
GO:BP	defense response to other organism	GO:0098542	1.01707e-05	4.99265	1218	217	40	18117	XRCC5,GAPDH,PSMA7,PSMB6,HSP90AB1,HSP90AA1,PSMA3,C5,PSMA1,PRDX1,XRCC6,TUBB4B,FGA,PSMA5,APP,TUBB,GSN,APOE,C4BPA,CFI,C4B,F2,ACTG1,C3,A2M,RNASET2,CLU,C2,TF,HP,PSME1,PSMB5,PSMA6,ILF3,CADM1,MIF,FGB,ICAM1,PGC,PSMB4
GO:BP	organic cyclic compound catabolic process	GO:1901361	1.03061e-05	4.98691	651	217	28	18117	AHCY,RPSA,PSMA7,PSMB6,QPRT,RPLP2,PSMA3,PSMA1,HSPA8,HSPA1B,PSMA5,YWHAZ,SET,APOE,RNASET2,AMBP,PSME1,PSMB5,PSMA6,SSB,RPLP0,RPL12,YBX1,KPNB1,HNRNPC,SPP1,NPM1,PSMB4
GO:BP	cellular response to stress	GO:0033554	1.2224e-05	4.91279	2111	217	56	18117	UBA1,XRCC5,PSMA7,PSMB6,HSP90AB1,HSPD1,NME2,HSP90AA1,PGK1,GSR,PDIA4,ENO1,PSMA3,PSMA1,HSPA8,PRDX1,HSPA1B,XRCC6,HSP90B1,PSMA5,APP,YWHAE,EEF2,P4HB,PTPRK,HSPA5,SERPINF2,CALR,PDIA3,THBS1,CLU,APOA1,DAG1,AMBP,ALB,VASN,TF,PCSK9,AGT,PRDX3,PSME1,PSMB5,PSMA6,HSPA9,IGFBP1,SOD1,MIF,DHRS2,YBX1,SPP1,NPM1,ICAM1,HNRNPK,LMNA,PSMB4,FH
GO:BP	response to inorganic substance	GO:0010035	1.38159e-05	4.85962	575	217	26	18117	GPI,HSPD1,LDHA,ATIC,PRDX1,GGH,FGA,APP,EEF2,GSN,FGG,APOB,HSPA5,CALR,ACTG1,THBS1,SERPINF1,TF,HP,GOT1,PRDX3,KRT8,SOD1,CUTA,FGB,ICAM1
GO:BP	regulation of cell death	GO:0010941	1.50483e-05	4.82251	1720	217	49	18117	TFRC,CTSC,GPI,HSP90AB1,HSPD1,NME2,CTSD,HSP90AA1,LDHA,ENO1,HSPA1B,ACTN4,FGA,HSP90B1,YWHAE,YWHAZ,SET,P4HB,GSN,FGG,APOE,HSPA5,PROC,CALR,PDIA3,THBS1,CLU,SERPINF1,ALB,APOH,PCSK9,AGT,HP,PRDX3,CFL1,KRT18,ACTN1,HSPA9,SOD1,MIF,DHRS2,FGB,CRLF1,NPM1,ICAM1,CTSB,HNRNPK,LMNA,DKK1
GO:BP	substrate adhesion-dependent cell spreading	GO:0034446	1.57965e-05	4.80144	109	217	12	18117	ATRN,FBLN1,ACTN4,FGA,P4HB,FGG,FN1,CALR,LAMC1,APOA1,LAMB1,FGB
GO:BP	negative regulation of canonical Wnt signaling pathway	GO:0090090	1.67886e-05	4.77499	187	217	15	18117	PSMA7,PSMB6,PSMA3,PSMA1,PSMA5,GPC3,CDH2,APOE,NOTUM,PSME1,PSMB5,PSMA6,IGFBP1,PSMB4,DKK1
GO:BP	mRNA catabolic process	GO:0006402	1.68971e-05	4.77219	384	217	21	18117	RPSA,PSMA7,PSMB6,RPLP2,PSMA3,PSMA1,HSPA8,HSPA1B,PSMA5,YWHAZ,SET,PSME1,PSMB5,PSMA6,SSB,RPLP0,RPL12,YBX1,HNRNPC,NPM1,PSMB4
GO:BP	Wnt signaling pathway, planar cell polarity pathway	GO:0060071	1.75458e-05	4.75583	110	217	12	18117	PSMA7,PSMB6,PSMA3,PSMA1,CLTC,PSMA5,GPC3,PSME1,PSMB5,PSMA6,PSMB4,DKK1
GO:BP	negative regulation of programmed cell death	GO:0043069	1.78535e-05	4.74828	943	217	34	18117	TFRC,GPI,HSP90AB1,HSPD1,NME2,ENO1,HSPA1B,FGA,HSP90B1,YWHAE,YWHAZ,SET,FGG,APOE,HSPA5,PROC,THBS1,CLU,ALB,APOH,PRDX3,CFL1,KRT18,HSPA9,SOD1,MIF,DHRS2,FGB,CRLF1,NPM1,ICAM1,HNRNPK,LMNA,DKK1
GO:BP	regulation of immune effector process	GO:0002697	1.78939e-05	4.74729	461	217	23	18117	TFRC,GPI,HSPD1,HSP90AA1,C5,RBP4,VTN,CPN1,C4BPA,CFI,APOA2,C4B,F2,PROS1,C3,A2M,CLU,APOA1,C2,CPN2,CADM1,ICAM1,PGC
GO:BP	glucose catabolic process	GO:0006007	1.8358e-05	4.73618	36	217	8	18117	PGAM1,GPI,GAPDH,PGK1,ENO1,ALDOA,PKM,TPI1
GO:BP	RNA catabolic process	GO:0006401	1.90128e-05	4.72095	424	217	22	18117	RPSA,PSMA7,PSMB6,RPLP2,PSMA3,PSMA1,HSPA8,HSPA1B,PSMA5,YWHAZ,SET,RNASET2,PSME1,PSMB5,PSMA6,SSB,RPLP0,RPL12,YBX1,HNRNPC,NPM1,PSMB4
GO:BP	negative regulation of response to stimulus	GO:0048585	1.92189e-05	4.71627	1733	217	49	18117	PSMA7,PSMB6,FBLN1,ENO1,PSMA3,C5,PSMA1,HSPA1B,FGA,PSMA5,TFPI,VTN,GPC3,CDH2,FGG,APOE,C4BPA,HSPA5,PROC,F2,SERPINF2,CALR,THBS1,PROS1,A2M,CLU,APOA1,AHSG,DAG1,AMBP,SERPINF1,NOTUM,VASN,APOH,AGT,PEBP1,PSME1,PSMB5,PSMA6,IGFBP1,SOD1,MIF,FGB,YBX1,SPP1,ICAM1,LMNA,PSMB4,DKK1
GO:BP	hematopoietic stem cell differentiation	GO:0060218	1.97929e-05	4.70349	89	217	11	18117	XRCC5,PSMA7,PSMB6,PSMA3,PSMA1,PSMA5,PSME1,PSMB5,PSMA6,HSPA9,PSMB4
GO:BP	gluconeogenesis	GO:0006094	1.97929e-05	4.70349	89	217	11	18117	PGAM1,GPI,GAPDH,PGK1,ENO1,ALDOA,MDH1,TPI1,RBP4,GOT1,MDH2
GO:BP	regulation of immune response	GO:0050776	2.00968e-05	4.69687	996	217	35	18117	TFRC,XRCC5,PSMA7,PSMB6,HSP90AB1,HSPD1,HSP90AA1,PSMA3,C5,PSMA1,XRCC6,PSMA5,VTN,CPN1,APOE,C4BPA,CFI,C4B,F2,ACTG1,PROS1,C3,A2M,CLU,C2,CPN2,AMBP,PSME1,PSMB5,PSMA6,FGL1,CADM1,ICAM1,PGC,PSMB4
GO:BP	programmed cell death	GO:0012501	2.09683e-05	4.67844	2143	217	56	18117	TFRC,CTSC,GPI,GAPDH,HSP90AB1,HSPD1,NME2,CTSD,HSP90AA1,KRT19,LDHA,ENO1,HSPA1B,ACTN4,PKM,FGA,HSP90B1,APP,YWHAE,YWHAZ,SET,P4HB,GSN,FGG,APOE,HSPA5,PROC,CALR,PDIA3,THBS1,CLU,KRT10,ALB,APOH,PCSK9,AGT,KRT9,PRDX3,CFL1,KRT8,KRT18,ACTN1,CADM1,HSPA9,SOD1,MIF,DHRS2,FGB,CRLF1,KPNB1,NPM1,ICAM1,CTSB,HNRNPK,LMNA,DKK1
GO:BP	innate immune response	GO:0045087	2.11466e-05	4.67476	998	217	35	18117	XRCC5,GAPDH,PSMA7,PSMB6,HSP90AB1,HSP90AA1,PSMA3,C5,PSMA1,PRDX1,XRCC6,TUBB4B,FGA,PSMA5,APP,TUBB,GSN,APOE,C4BPA,CFI,C4B,ACTG1,C3,A2M,RNASET2,CLU,C2,PSME1,PSMB5,PSMA6,CADM1,MIF,FGB,ICAM1,PSMB4
GO:BP	regulation of mRNA stability	GO:0043488	2.23865e-05	4.65001	191	217	15	18117	PSMA7,PSMB6,PSMA3,PSMA1,HSPA8,PSMA5,YWHAZ,SET,PSME1,PSMB5,PSMA6,YBX1,HNRNPC,NPM1,PSMB4
GO:BP	regulation of establishment of planar polarity	GO:0090175	2.64191e-05	4.57808	114	217	12	18117	PSMA7,PSMB6,PSMA3,PSMA1,CLTC,PSMA5,GPC3,PSME1,PSMB5,PSMA6,PSMB4,DKK1
GO:BP	hexose biosynthetic process	GO:0019319	2.82324e-05	4.54925	92	217	11	18117	PGAM1,GPI,GAPDH,PGK1,ENO1,ALDOA,MDH1,TPI1,RBP4,GOT1,MDH2
GO:BP	positive regulation of response to external stimulus	GO:0032103	2.88309e-05	4.54014	513	217	24	18117	CTSC,XRCC5,PSMA7,PSMB6,HSPD1,HSP90AA1,PSMA3,PSMA1,XRCC6,PSMA5,APP,F2,SERPINF2,CALR,THBS1,C3,APOH,AGT,PSME1,PSMB5,PSMA6,CADM1,PGC,PSMB4
GO:BP	positive regulation of response to stimulus	GO:0048584	2.93251e-05	4.53276	2344	217	59	18117	TFRC,CTSC,XRCC5,PSMA7,PSMB6,HSP90AB1,HSPD1,HSP90AA1,PSMA3,C5,PSMA1,HSPA1B,XRCC6,ACTN4,FGA,PSMA5,APP,VTN,CPN1,GPC3,CDH2,F10,FGG,APOE,C4BPA,CFI,C4B,FN1,F2,SERPINF2,CALR,ACTG1,PDIA3,THBS1,PROS1,C3,LRG1,A2M,RELN,CLU,APOA1,C2,CPN2,APOH,TF,AGT,GOT1,PSME1,PSMB5,PSMA6,CADM1,SOD1,MIF,FGB,IGF2,ICAM1,PGC,PSMB4,DKK1
GO:BP	macromolecule modification	GO:0043412	3.24925e-05	4.48822	4257	217	88	18117	TFRC,UBA1,XRCC5,GAPDH,PSMA7,PSMB6,HSP90AB1,NME2,HSP90AA1,FBLN1,PDIA4,PSMA3,C5,PSMA1,HSPA1B,XRCC6,FGA,HSP90B1,PSMA5,APP,YWHAE,YWHAZ,VTN,SET,P4HB,GPC3,SPTBN1,CDH2,PTPRK,FGG,APOB,APOE,SERPIND1,HSPA5,APOA2,FN1,PROC,F2,LAMC1,PDIA3,ITIH2,THBS1,CPE,C3,SDC4,RELN,CLU,APOA1,AHSG,MATN3,DAG1,SERPINA1,KRT10,AMBP,AFP,NOTUM,SERPINC1,ALB,TF,PCSK9,AGT,F5,BPIFB2,CP,PRDX3,PSME1,PSMB5,PSMA6,SSB,ILF3,IGFBP1,SOD1,MIF,…
GO:BP	cell death	GO:0008219	3.36264e-05	4.47332	2292	217	58	18117	TFRC,CTSC,GPI,GAPDH,HSP90AB1,HSPD1,NME2,CTSD,HSP90AA1,KRT19,LDHA,ENO1,HSPA1B,ACTN4,PKM,FGA,HSP90B1,APP,YWHAE,YWHAZ,SET,P4HB,GSN,FGG,APOE,HSPA5,PROC,CALR,PDIA3,THBS1,CLU,KRT10,SERPINF1,ALB,APOH,PCSK9,AGT,KRT9,HP,PRDX3,CFL1,KRT8,KRT18,ACTN1,CADM1,HSPA9,SOD1,MIF,DHRS2,FGB,CRLF1,KPNB1,NPM1,ICAM1,CTSB,HNRNPK,LMNA,DKK1
GO:BP	heterocycle catabolic process	GO:0046700	3.52867e-05	4.45239	602	217	26	18117	AHCY,RPSA,PSMA7,PSMB6,QPRT,RPLP2,PSMA3,PSMA1,HSPA8,HSPA1B,PSMA5,YWHAZ,SET,RNASET2,AMBP,PSME1,PSMB5,PSMA6,SSB,RPLP0,RPL12,YBX1,KPNB1,HNRNPC,NPM1,PSMB4
GO:BP	extracellular matrix organization	GO:0030198	3.59604e-05	4.44418	401	217	21	18117	AGRN,FBLN1,FGA,NID1,APP,VTN,FGG,TTR,FN1,SERPINF2,LAMC1,THBS1,A2M,MATN3,DAG1,AGT,LAMB1,FGB,SPP1,ICAM1,VCAN
GO:BP	positive regulation of transport	GO:0051050	3.73593e-05	4.4276	923	217	33	18117	GLUD1,RAN,HSP90AB1,ACTN4,FGA,RBP4,YWHAE,YWHAZ,VTN,GPC3,CDH2,FGG,APOE,APOA2,C4B,F2,CALR,C3,SDC4,RELN,CLU,APOA1,C2,AHSG,TF,PCSK9,AGT,PLTP,SOD1,DPYSL2,FGB,SPP1,HNRNPK
GO:BP	extracellular structure organization	GO:0043062	3.75462e-05	4.42543	402	217	21	18117	AGRN,FBLN1,FGA,NID1,APP,VTN,FGG,TTR,FN1,SERPINF2,LAMC1,THBS1,A2M,MATN3,DAG1,AGT,LAMB1,FGB,SPP1,ICAM1,VCAN
GO:BP	external encapsulating structure organization	GO:0045229	4.09139e-05	4.38813	404	217	21	18117	AGRN,FBLN1,FGA,NID1,APP,VTN,FGG,TTR,FN1,SERPINF2,LAMC1,THBS1,A2M,MATN3,DAG1,AGT,LAMB1,FGB,SPP1,ICAM1,VCAN
GO:BP	cell-substrate adhesion	GO:0031589	4.14702e-05	4.38226	367	217	20	18117	ATRN,FBLN1,ACTN4,FGA,NID1,VTN,P4HB,PTPRK,FGG,FN1,CALR,LAMC1,ACTG1,THBS1,SDC4,APOA1,DAG1,ACTN1,LAMB1,FGB
GO:BP	regulation of response to stimulus	GO:0048583	4.15521e-05	4.38141	4278	217	88	18117	TFRC,CTSC,XRCC5,PSMA7,PSMB6,HSP90AB1,HSPD1,HSP90AA1,FBLN1,ENO1,PSMA3,C5,PSMA1,HSPA8,PRDX1,HSPA1B,XRCC6,ACTN4,FGA,PSMA5,APP,YWHAE,TFPI,YWHAZ,VTN,CPN1,P4HB,GPC3,SPTBN1,CDH2,F10,FGG,APOE,C4BPA,CFI,HSPA5,C4B,FN1,PROC,F2,SERPINF2,CALR,ACTG1,PDIA3,THBS1,PROS1,C3,LRG1,A2M,RELN,CLU,APOA1,C2,AHSG,DAG1,CPN2,AMBP,SERPINF1,APOC3,NOTUM,SERPINC1,VASN,APOH,TF,PCSK9,AGT,GOT1,PEBP1,PSME1,PSMB5,PSMA6,FGL1,CADM1,IG…
GO:BP	isoprenoid metabolic process	GO:0006720	4.19436e-05	4.37733	144	217	13	18117	AGRN,ALDH1A1,AKR1C1,RBP4,GPC3,TTR,APOB,APOE,APOM,APOA2,SDC4,APOA1,APOC3
GO:BP	cellular nitrogen compound catabolic process	GO:0044270	4.31316e-05	4.3652	608	217	26	18117	AHCY,RPSA,PSMA7,PSMB6,QPRT,RPLP2,PSMA3,PSMA1,HSPA8,HSPA1B,PSMA5,YWHAZ,SET,RNASET2,AMBP,PSME1,PSMB5,PSMA6,SSB,RPLP0,RPL12,YBX1,KPNB1,HNRNPC,NPM1,PSMB4
GO:BP	biological adhesion	GO:0022610	4.4454e-05	4.35209	1499	217	44	18117	TFRC,RPSA,ATRN,HSP90AB1,HSPD1,CLSTN1,NME2,FBLN1,CLIC1,ACTN4,FGA,NID1,APP,VTN,P4HB,CDH2,GSN,CLSTN3,PTPRK,FGG,FN1,SERPINF2,CALR,LAMC1,ACTG1,THBS1,LGALS3BP,SDC4,RELN,APOA1,DAG1,AMBP,AZGP1,KRT18,ACTN1,FGL1,CADM1,LAMB1,FGB,ALCAM,IGF2,SPP1,ICAM1,VCAN
GO:BP	negative regulation of response to external stimulus	GO:0032102	4.45595e-05	4.35106	406	217	21	18117	C5,PSMA1,FGA,TFPI,VTN,FGG,APOE,PROC,F2,SERPINF2,THBS1,PROS1,A2M,APOA1,SERPINF1,APOH,SOD1,MIF,FGB,SPP1,PSMB4
GO:BP	regulation of RNA stability	GO:0043487	4.45871e-05	4.35079	201	217	15	18117	PSMA7,PSMB6,PSMA3,PSMA1,HSPA8,PSMA5,YWHAZ,SET,PSME1,PSMB5,PSMA6,YBX1,HNRNPC,NPM1,PSMB4
GO:BP	biological regulation	GO:0065007	4.50232e-05	4.34656	12809	217	188	18117	AGRN,TFRC,GLUD1,FASN,RAN,PGAM1,CTSC,SPTAN1,RPSA,ALDH1A1,AKR1C1,XRCC5,GPI,ATRN,GAPDH,PSMA7,PSMB6,HSP90AB1,HSPD1,CLSTN1,NME2,IDH1,CTSD,HSP90AA1,KRT19,PGK1,LDHA,FBLN1,HSPE1,TALDO1,RPLP2,GSR,PDIA4,ENO1,PSMA3,C5,PSMA1,HSPA8,CLIC1,PRDX1,ALDOA,HSPA1B,XRCC6,ACTN4,CLTC,TUBB4B,PKM,FGA,HSP90B1,NID1,PSMA5,TKT,RBP4,APP,TUBB,YWHAE,TFPI,EEF2,YWHAZ,PSAP,VTN,CPN1,SET,P4HB,GPC3,SERPINA7,SPTBN1,CDH2,GSN,CLSTN3,FLNB…
GO:BP	regulation of hematopoietic stem cell differentiation	GO:1902036	4.51477e-05	4.34536	75	217	10	18117	PSMA7,PSMB6,PSMA3,PSMA1,PSMA5,PSME1,PSMB5,PSMA6,HSPA9,PSMB4
GO:BP	macromolecule metabolic process	GO:0043170	4.56578e-05	4.34048	9796	217	157	18117	AGRN,TFRC,RAN,UBA1,PGAM1,CTSC,RPSA,XRCC5,GPI,GAPDH,PSMA7,PSMB6,HSP90AB1,HSPD1,EEF1G,NME2,CTSD,HSP90AA1,PGK1,FBLN1,HSPE1,RPLP2,PDIA4,ENO1,PSMA3,C5,PSMA1,HSPA8,HSPA1B,XRCC6,ACTN4,GGH,CLTC,PKM,FGA,HSP90B1,PSMA5,RBP4,APP,YWHAE,TFPI,EEF2,YWHAZ,VTN,CPN1,SET,P4HB,GPC3,SERPINA7,SPTBN1,CDH2,GSN,PTPRK,F10,SERPINA3,FGG,TTR,APOB,APOE,APOM,C4BPA,CFI,SERPIND1,HSPA5,APOA2,C4B,FN1,PROC,F2,SERPINF2,CALR,LAMC1,ACT…
GO:BP	hexose catabolic process	GO:0019320	5.1074e-05	4.2918	57	217	9	18117	PGAM1,ALDH1A1,GPI,GAPDH,PGK1,ENO1,ALDOA,PKM,TPI1
GO:BP	antigen processing and presentation	GO:0019882	5.14099e-05	4.28895	234	217	16	18117	PSMA7,PSMB6,CTSD,PSMA3,PSMA1,CLTC,PSMA5,CALR,PDIA3,THBS1,AZGP1,PSME1,PSMB5,PSMA6,ICAM1,PSMB4
GO:BP	positive regulation of multicellular organismal process	GO:0051240	5.48451e-05	4.26086	1455	217	43	18117	AGRN,TFRC,XRCC5,GAPDH,HSPD1,CLSTN1,NME2,HSP90AA1,ENO1,C5,HSPA1B,XRCC6,PKM,FGA,APP,SPTBN1,CLSTN3,FGG,APOE,APOA2,FN1,F2,SERPINF2,THBS1,C3,LRG1,RELN,CLU,DAG1,SERPINF1,ORM2,ORM1,APOH,AGT,CFL1,CADM1,SOD1,MIF,FGB,IGF2,ICAM1,FH,DKK1
GO:BP	negative regulation of cell death	GO:0060548	5.68067e-05	4.2456	1038	217	35	18117	TFRC,GPI,HSP90AB1,HSPD1,NME2,ENO1,HSPA1B,FGA,HSP90B1,YWHAE,YWHAZ,SET,FGG,APOE,HSPA5,PROC,THBS1,CLU,SERPINF1,ALB,APOH,PRDX3,CFL1,KRT18,HSPA9,SOD1,MIF,DHRS2,FGB,CRLF1,NPM1,ICAM1,HNRNPK,LMNA,DKK1
GO:BP	response to topologically incorrect protein	GO:0035966	5.80683e-05	4.23606	205	217	15	18117	HSPA4,HSP90AB1,HSPD1,HSP90AA1,HSPE1,HSPA8,HSPA1B,HSP90B1,HSPA5,CALR,THBS1,CLU,HSPA9,IGFBP1,LMNA
GO:BP	zymogen activation	GO:0031638	5.98317e-05	4.22307	58	217	9	18117	PGK1,ENO1,FGA,FGG,SERPINF2,THBS1,APOH,HP,FGB
GO:BP	antigen processing and presentation of peptide antigen via MHC class I	GO:0002474	6.15317e-05	4.2109	99	217	11	18117	PSMA7,PSMB6,PSMA3,PSMA1,PSMA5,CALR,PDIA3,PSME1,PSMB5,PSMA6,PSMB4
GO:BP	chylomicron remodeling	GO:0034371	6.20218e-05	4.20746	9	217	5	18117	APOB,APOE,APOA2,APOA1,APOC3
GO:BP	tumor necrosis factor-mediated signaling pathway	GO:0033209	6.42413e-05	4.19219	177	217	14	18117	PSMA7,PSMB6,PSMA3,PSMA1,HSPA1B,ACTN4,PSMA5,APOA1,KRT8,PSME1,PSMB5,PSMA6,KRT18,PSMB4
GO:BP	macromolecule catabolic process	GO:0009057	7.08817e-05	4.14947	1468	217	43	18117	AGRN,UBA1,CTSC,RPSA,PSMA7,PSMB6,HSP90AB1,CTSD,HSP90AA1,RPLP2,PSMA3,PSMA1,HSPA8,HSPA1B,CLTC,HSP90B1,PSMA5,YWHAZ,SET,GPC3,APOB,APOE,C4BPA,HSPA5,SDC4,RNASET2,CLU,AMBP,NOTUM,PCSK9,PSME1,PSMB5,PSMA6,SSB,RPLP0,RPL12,YBX1,KPNB1,HNRNPC,NPM1,CTSB,PSMB4,VCAN
GO:BP	morphogenesis of a polarized epithelium	GO:0001738	8.02679e-05	4.09546	152	217	13	18117	PSMA7,PSMB6,PSMA3,PSMA1,CLTC,PSMA5,GPC3,ACTG1,PSME1,PSMB5,PSMA6,PSMB4,DKK1
GO:BP	tissue development	GO:0009888	8.16487e-05	4.08805	2107	217	54	18117	AGRN,FASN,AKR1C1,GPI,ATRN,PSMA7,PSMB6,NME2,KRT19,PGK1,PSMA3,PSMA1,CLTC,PKM,PSMA5,RBP4,EEF2,PSAP,VTN,GPC3,CDH2,GSN,FN1,PROC,CALR,LAMC1,ACTG1,C3,SDC4,AHSG,MATN3,DAG1,KRT10,VASN,AGT,KRT9,KRT8,PSME1,PSMB5,PSMA6,KRT18,IGFBP1,SOD1,LAMB1,YBX1,CRLF1,IGF2,SPP1,ICAM1,CTSB,LARGE1,LMNA,PSMB4,DKK1
GO:BP	cytokine-mediated signaling pathway	GO:0019221	8.29864e-05	4.08099	810	217	30	18117	PSMA7,PSMB6,HSP90AB1,HSP90AA1,TALDO1,PSMA3,PSMA1,HSPA8,HSPA1B,ACTN4,HSP90B1,PSMA5,YWHAZ,P4HB,FN1,APOA1,CFL1,KRT8,PSME1,PSMB5,PSMA6,KRT18,RPLP0,HSPA9,SOD1,MIF,CRLF1,ICAM1,LMNB1,PSMB4
GO:BP	apoptotic process	GO:0006915	8.40574e-05	4.07542	1990	217	52	18117	TFRC,CTSC,GPI,GAPDH,HSP90AB1,HSPD1,NME2,CTSD,HSP90AA1,LDHA,ENO1,HSPA1B,ACTN4,FGA,HSP90B1,APP,YWHAE,YWHAZ,SET,P4HB,GSN,FGG,APOE,HSPA5,PROC,CALR,PDIA3,THBS1,CLU,ALB,APOH,PCSK9,AGT,PRDX3,CFL1,KRT8,KRT18,ACTN1,CADM1,HSPA9,SOD1,MIF,DHRS2,FGB,CRLF1,KPNB1,NPM1,ICAM1,CTSB,HNRNPK,LMNA,DKK1
GO:BP	monosaccharide metabolic process	GO:0005996	8.64964e-05	4.063	276	217	17	18117	PGAM1,ALDH1A1,GPI,GAPDH,PGK1,TALDO1,ENO1,ALDOA,PKM,MDH1,TKT,TPI1,RBP4,GOT1,MDH2,IGF2,FUCA2
GO:BP	humoral immune response	GO:0006959	8.78514e-05	4.05625	384	217	20	18117	GPI,GAPDH,C5,FGA,VTN,CPN1,C4BPA,CFI,C4B,F2,PROS1,C3,A2M,CLU,C2,CPN2,TF,BPIFB2,FGB,PGC
GO:BP	cellular response to hypoxia	GO:0071456	9.08599e-05	4.04163	212	217	15	18117	PSMA7,PSMB6,PGK1,ENO1,PSMA3,PSMA1,PSMA5,P4HB,VASN,PSME1,PSMB5,PSMA6,ICAM1,LMNA,PSMB4
GO:BP	regulation of mRNA catabolic process	GO:0061013	9.67197e-05	4.01449	213	217	15	18117	PSMA7,PSMB6,PSMA3,PSMA1,HSPA8,PSMA5,YWHAZ,SET,PSME1,PSMB5,PSMA6,YBX1,HNRNPC,NPM1,PSMB4
GO:BP	carbohydrate biosynthetic process	GO:0016051	0.000102921	3.9875	214	217	15	18117	PGAM1,GPI,GAPDH,PGK1,TALDO1,ENO1,ALDOA,CLTC,MDH1,TKT,TPI1,RBP4,GOT1,MDH2,IGF2
GO:BP	response to unfolded protein	GO:0006986	0.000104858	3.9794	184	217	14	18117	HSPA4,HSP90AB1,HSPD1,HSP90AA1,HSPE1,HSPA8,HSPA1B,HSP90B1,HSPA5,CALR,THBS1,HSPA9,IGFBP1,LMNA
GO:BP	regulation of localization	GO:0032879	0.000108463	3.96472	2872	217	66	18117	TFRC,GLUD1,RAN,GPI,HSP90AB1,CTSD,HSP90AA1,FBLN1,C5,HSPA8,CLIC1,ACTN4,CLTC,FGA,RBP4,APP,YWHAE,YWHAZ,VTN,GPC3,SPTBN1,CDH2,GSN,CLSTN3,PTPRK,F10,FGG,APOB,APOE,HSPA5,APOA2,C4B,FN1,F2,CALR,ACTG1,THBS1,C3,SDC4,RELN,CLU,APOA1,C2,AHSG,DAG1,SERPINF1,APOC3,APOH,TF,PCSK9,AGT,PLTP,ACTN1,SOD1,MIF,LAMB1,DPYSL2,FGB,CCT8,CCT3,SPP1,ICAM1,HNRNPK,NUCB1,LMNA,DKK1
GO:BP	cell adhesion	GO:0007155	0.000112761	3.94784	1492	217	43	18117	TFRC,RPSA,ATRN,HSPD1,CLSTN1,NME2,FBLN1,CLIC1,ACTN4,FGA,NID1,APP,VTN,P4HB,CDH2,GSN,CLSTN3,PTPRK,FGG,FN1,SERPINF2,CALR,LAMC1,ACTG1,THBS1,LGALS3BP,SDC4,RELN,APOA1,DAG1,AMBP,AZGP1,KRT18,ACTN1,FGL1,CADM1,LAMB1,FGB,ALCAM,IGF2,SPP1,ICAM1,VCAN
GO:BP	animal organ development	GO:0048513	0.000115189	3.93859	3672	217	78	18117	AGRN,TFRC,GLUD1,FASN,XRCC5,ATRN,PSMA7,PSMB6,HSP90AB1,NME2,IDH1,KRT19,LDHA,ATIC,PSMA3,PSMA1,HSPA1B,XRCC6,CLTC,PKM,NID1,PSMA5,RBP4,APP,YWHAE,EEF2,YWHAZ,PSAP,GPC3,CDH2,FLNB,PTPRK,HSPA5,FN1,CALR,LAMC1,THBS1,CPE,SERPINA5,SDC4,RELN,APOA1,AHSG,MATN3,DAG1,KRT10,SERPINF1,AFP,SERPINC1,VASN,TF,PCSK9,AGT,KRT9,PRDX3,KRT8,PSME1,PSMB5,PSMA6,KRT18,ACTN1,FGL1,HSPA9,SOD1,LAMB1,DPYSL2,DHRS2,CRLF1,PRKCSH,IGF2,NASP,S…
GO:BP	establishment of planar polarity	GO:0001736	0.000116562	3.93344	130	217	12	18117	PSMA7,PSMB6,PSMA3,PSMA1,CLTC,PSMA5,GPC3,PSME1,PSMB5,PSMA6,PSMB4,DKK1
GO:BP	establishment of tissue polarity	GO:0007164	0.000116562	3.93344	130	217	12	18117	PSMA7,PSMB6,PSMA3,PSMA1,CLTC,PSMA5,GPC3,PSME1,PSMB5,PSMA6,PSMB4,DKK1
GO:BP	positive regulation of cell communication	GO:0010647	0.000118474	3.92638	1777	217	48	18117	TFRC,GLUD1,CTSC,PSMA7,PSMB6,HSP90AB1,CLSTN1,HSP90AA1,PSMA3,C5,PSMA1,HSPA1B,ACTN4,FGA,PSMA5,RBP4,APP,VTN,GPC3,CDH2,CLSTN3,F10,FGG,APOE,FN1,F2,SERPINF2,CALR,PDIA3,THBS1,C3,LRG1,RELN,APOA1,TF,AGT,GOT1,PSME1,PSMB5,PSMA6,SOD1,MIF,FGB,IGF2,SPP1,ICAM1,PSMB4,DKK1
GO:BP	monosaccharide catabolic process	GO:0046365	0.000126266	3.89871	63	217	9	18117	PGAM1,ALDH1A1,GPI,GAPDH,PGK1,ENO1,ALDOA,PKM,TPI1
GO:BP	positive regulation of signaling	GO:0023056	0.000129176	3.88882	1782	217	48	18117	TFRC,GLUD1,CTSC,PSMA7,PSMB6,HSP90AB1,CLSTN1,HSP90AA1,PSMA3,C5,PSMA1,HSPA1B,ACTN4,FGA,PSMA5,RBP4,APP,VTN,GPC3,CDH2,CLSTN3,F10,FGG,APOE,FN1,F2,SERPINF2,CALR,PDIA3,THBS1,C3,LRG1,RELN,APOA1,TF,AGT,GOT1,PSME1,PSMB5,PSMA6,SOD1,MIF,FGB,IGF2,SPP1,ICAM1,PSMB4,DKK1
GO:BP	negative regulation of Wnt signaling pathway	GO:0030178	0.000131508	3.88105	218	217	15	18117	PSMA7,PSMB6,PSMA3,PSMA1,PSMA5,GPC3,CDH2,APOE,NOTUM,PSME1,PSMB5,PSMA6,IGFBP1,PSMB4,DKK1
GO:BP	plasma lipoprotein particle assembly	GO:0034377	0.00014376	3.84236	31	217	7	18117	P4HB,APOB,APOE,APOM,APOA2,APOA1,APOC3
GO:BP	regulation of cellular amino acid metabolic process	GO:0006521	0.000145414	3.83739	64	217	9	18117	PSMA7,PSMB6,PSMA3,PSMA1,PSMA5,PSME1,PSMB5,PSMA6,PSMB4
GO:BP	cellular response to decreased oxygen levels	GO:0036294	0.000167131	3.77694	222	217	15	18117	PSMA7,PSMB6,PGK1,ENO1,PSMA3,PSMA1,PSMA5,P4HB,VASN,PSME1,PSMB5,PSMA6,ICAM1,LMNA,PSMB4
GO:BP	interleukin-12-mediated signaling pathway	GO:0035722	0.000170368	3.76861	47	217	8	18117	TALDO1,P4HB,CFL1,RPLP0,HSPA9,SOD1,MIF,LMNB1
GO:BP	positive regulation of defense response	GO:0031349	0.000172678	3.76276	362	217	19	18117	CTSC,XRCC5,PSMA7,PSMB6,HSPD1,HSP90AA1,PSMA3,PSMA1,XRCC6,PSMA5,APP,C3,AGT,PSME1,PSMB5,PSMA6,CADM1,PGC,PSMB4
GO:BP	regulation of cell cycle G2/M phase transition	GO:1902749	0.000177307	3.75127	223	217	15	18117	PSMA7,PSMB6,HSP90AA1,PSMA3,PSMA1,TUBB4B,PSMA5,APP,TUBB,YWHAE,PSME1,PSMB5,PSMA6,NPM1,PSMB4
GO:BP	antigen processing and presentation of peptide antigen	GO:0048002	0.000178743	3.74777	192	217	14	18117	PSMA7,PSMB6,CTSD,PSMA3,PSMA1,CLTC,PSMA5,CALR,PDIA3,AZGP1,PSME1,PSMB5,PSMA6,PSMB4
GO:BP	anatomical structure homeostasis	GO:0060249	0.000185867	3.7308	482	217	22	18117	TFRC,XRCC5,HSP90AB1,HSP90AA1,PRDX1,ALDOA,XRCC6,RBP4,SERPINA3,LAMC1,ACTG1,ALB,TF,AZGP1,SOD1,CCT8,CCT3,HNRNPC,SPP1,LARGE1,LMNA,FH
GO:BP	homeostatic process	GO:0042592	0.000190511	3.72008	1981	217	51	18117	TFRC,ALDH1A1,AKR1C1,XRCC5,GPI,HSP90AB1,NME2,HSP90AA1,GSR,PDIA4,PRDX1,ALDOA,HSPA1B,XRCC6,HSP90B1,RBP4,APP,YWHAE,P4HB,CDH2,SERPINA3,APOB,APOE,APOM,APOA2,F2,CALR,LAMC1,ACTG1,PDIA3,APOA1,SERPINF1,APOC3,ALB,TF,AZGP1,PCSK9,AGT,CP,GOT1,PRDX3,HSPA9,SOD1,CCT8,CCT3,HNRNPC,SPP1,ICAM1,LARGE1,LMNA,FH
GO:BP	nucleobase-containing compound catabolic process	GO:0034655	0.000190767	3.7195	567	217	24	18117	AHCY,RPSA,PSMA7,PSMB6,RPLP2,PSMA3,PSMA1,HSPA8,HSPA1B,PSMA5,YWHAZ,SET,RNASET2,PSME1,PSMB5,PSMA6,SSB,RPLP0,RPL12,YBX1,KPNB1,HNRNPC,NPM1,PSMB4
GO:BP	secondary alcohol metabolic process	GO:1902652	0.000197706	3.70398	164	217	13	18117	ACAT2,FASN,RAN,IDH1,APP,APOB,APOE,APOA2,APOA1,PCSK9,SOD1,KPNB1,ACLY
GO:BP	regulation of defense response	GO:0031347	0.000211473	3.67474	704	217	27	18117	CTSC,XRCC5,PSMA7,PSMB6,HSP90AB1,HSPD1,HSP90AA1,PSMA3,PSMA1,XRCC6,PSMA5,APP,APOE,PROC,C3,A2M,APOA1,AHSG,SERPINF1,AGT,PSME1,PSMB5,PSMA6,CADM1,SOD1,PGC,PSMB4
GO:BP	protein folding in endoplasmic reticulum	GO:0034975	0.000223003	3.65169	11	217	5	18117	HSP90B1,P4HB,HSPA5,CALR,PDIA3
GO:BP	regulation of small molecule metabolic process	GO:0062012	0.000229406	3.63939	447	217	21	18117	FASN,RAN,PGAM1,PSMA7,PSMB6,ENO1,PSMA3,PSMA1,PSMA5,APP,APOB,APOE,APOA1,APOC3,PSME1,PSMB5,PSMA6,SOD1,KPNB1,IGF2,PSMB4
GO:BP	cellular response to interleukin-12	GO:0071349	0.000239362	3.62095	49	217	8	18117	TALDO1,P4HB,CFL1,RPLP0,HSPA9,SOD1,MIF,LMNB1
GO:BP	regulation of hematopoietic progenitor cell differentiation	GO:1901532	0.000239378	3.62092	89	217	10	18117	PSMA7,PSMB6,PSMA3,PSMA1,PSMA5,PSME1,PSMB5,PSMA6,HSPA9,PSMB4
GO:BP	aromatic compound catabolic process	GO:0019439	0.000279922	3.55296	623	217	25	18117	AHCY,RPSA,PSMA7,PSMB6,RPLP2,PSMA3,PSMA1,HSPA8,HSPA1B,PSMA5,YWHAZ,SET,RNASET2,AMBP,PSME1,PSMB5,PSMA6,SSB,RPLP0,RPL12,YBX1,KPNB1,HNRNPC,NPM1,PSMB4
GO:BP	negative regulation of multicellular organismal process	GO:0051241	0.00028035	3.5523	1160	217	36	18117	CTSC,ALDH1A1,HSP90AB1,NME2,PGK1,FBLN1,FGA,RBP4,TFPI,VTN,FGG,APOE,APOM,APOA2,FN1,PROC,F2,SERPINF2,CALR,THBS1,PROS1,APOA1,AHSG,SERPINF1,APOC3,VASN,ORM1,APOH,PCSK9,AGT,HSPA9,SOD1,FGB,SPP1,LMNA,DKK1
GO:BP	response to interleukin-12	GO:0070671	0.000282041	3.54969	50	217	8	18117	TALDO1,P4HB,CFL1,RPLP0,HSPA9,SOD1,MIF,LMNB1
GO:BP	cellular component assembly	GO:0022607	0.00028456	3.54583	3010	217	67	18117	AGRN,TFRC,CTSC,SPTAN1,RPSA,HSPA4,XRCC5,HSP90AB1,HSPD1,CLSTN1,HSP90AA1,KRT19,HSPA8,ALDOA,HSPA1B,CLTC,TUBB4B,FGA,HSP90B1,APP,TUBB,YWHAE,YWHAZ,SET,P4HB,SPTBN1,CDH2,GSN,CLSTN3,PTPRK,FGG,APOB,APOE,APOM,HSPA5,APOA2,FN1,SERPINF2,CALR,LAMC1,ACTG1,THBS1,SDC4,CLU,APOA1,DAG1,SERPINA1,KRT10,APOC3,AGT,F5,KRT8,ACTN1,RPLP0,HSPA9,RPL12,MIF,LAMB1,UGDH,FGB,CCT8,KPNB1,CCT3,NASP,NPM1,ICAM1,DKK1
GO:BP	plasma lipoprotein particle clearance	GO:0034381	0.000322692	3.49121	70	217	9	18117	CLTC,APOB,APOE,APOM,APOA2,APOA1,APOC3,PCSK9,HNRNPK
GO:BP	protein-lipid complex assembly	GO:0065005	0.00035298	3.45225	35	217	7	18117	P4HB,APOB,APOE,APOM,APOA2,APOA1,APOC3
GO:BP	regulation of cellular catabolic process	GO:0031329	0.000357197	3.44709	866	217	30	18117	PGAM1,CTSC,GAPDH,PSMA7,PSMB6,HSP90AB1,IDH1,HSP90AA1,PSMA3,PSMA1,HSPA8,HSPA1B,PSMA5,APP,YWHAZ,PSAP,SET,APOE,CLU,APOA1,APOC3,PCSK9,HP,PSME1,PSMB5,PSMA6,YBX1,HNRNPC,NPM1,PSMB4
GO:BP	activation of innate immune response	GO:0002218	0.000361883	3.44143	144	217	12	18117	XRCC5,PSMA7,PSMB6,HSP90AA1,PSMA3,PSMA1,XRCC6,PSMA5,PSME1,PSMB5,PSMA6,PSMB4
GO:BP	steroid metabolic process	GO:0008202	0.000369193	3.43275	342	217	18	18117	ACAT2,FASN,RAN,AKR1C1,APP,APOB,APOE,APOA2,APOA1,SERPINA6,AFP,PCSK9,AGT,SOD1,DHRS2,KPNB1,SPP1,ACLY
GO:BP	reverse cholesterol transport	GO:0043691	0.000380826	3.41927	22	217	6	18117	APOE,APOM,APOA2,CLU,APOA1,APOC3
GO:BP	cellular response to tumor necrosis factor	GO:0071356	0.000383195	3.41658	306	217	17	18117	PSMA7,PSMB6,PSMA3,PSMA1,HSPA1B,ACTN4,PSMA5,APOB,THBS1,APOA1,KRT8,PSME1,PSMB5,PSMA6,KRT18,ICAM1,PSMB4
GO:BP	antigen processing and presentation of exogenous peptide antigen	GO:0002478	0.000395427	3.40293	174	217	13	18117	PSMA7,PSMB6,CTSD,PSMA3,PSMA1,CLTC,PSMA5,CALR,PDIA3,PSME1,PSMB5,PSMA6,PSMB4
GO:BP	alcohol metabolic process	GO:0006066	0.000398729	3.39932	382	217	19	18117	ACAT2,FASN,RAN,ALDH1A1,AKR1C1,IDH1,TPI1,RBP4,APP,TTR,APOB,APOE,APOA2,APOA1,PCSK9,GOT1,SOD1,KPNB1,ACLY
GO:BP	regulation of G2/M transition of mitotic cell cycle	GO:0010389	0.000453636	3.34329	207	217	14	18117	PSMA7,PSMB6,HSP90AA1,PSMA3,PSMA1,TUBB4B,PSMA5,APP,TUBB,YWHAE,PSME1,PSMB5,PSMA6,PSMB4
GO:BP	cellular response to oxygen levels	GO:0071453	0.000462093	3.33527	240	217	15	18117	PSMA7,PSMB6,PGK1,ENO1,PSMA3,PSMA1,PSMA5,P4HB,VASN,PSME1,PSMB5,PSMA6,ICAM1,LMNA,PSMB4
GO:BP	cellular catabolic process	GO:0044248	0.000485241	3.31404	2347	217	56	18117	GLUD1,ACAT2,UBA1,AHCY,PGAM1,CTSC,RPSA,GAPDH,PSMA7,PSMB6,QPRT,HSP90AB1,IDH1,HSP90AA1,RPLP2,PSMA3,PSMA1,HSPA8,PRDX1,HSPA1B,CLTC,HSP90B1,PSMA5,TPI1,APP,YWHAZ,PSAP,CPN1,SET,APOB,APOE,HSPA5,APOA2,RNASET2,CLU,APOA1,AMBP,APOC3,PCSK9,HP,GOT1,PRDX3,PSME1,PSMB5,PSMA6,SSB,RPLP0,RPL12,ECH1,YBX1,KPNB1,HNRNPC,NPM1,CTSB,PSMB4,VCAN
GO:BP	regulation of cellular component organization	GO:0051128	0.000503303	3.29817	2412	217	57	18117	AGRN,TFRC,SPTAN1,XRCC5,CLSTN1,NME2,HSP90AA1,ENO1,HSPA8,HSPA1B,CLTC,APP,TUBB,YWHAE,YWHAZ,VTN,SET,GPC3,SPTBN1,CDH2,GSN,CLSTN3,APOE,APOM,HSPA5,APOA2,FN1,F2,SERPINF2,CALR,ACTG1,THBS1,C3,SDC4,RELN,CLU,APOA1,DAG1,SERPINF1,APOC3,TF,PCSK9,AGT,CFL1,IGFBP1,DPYSL2,CCT8,CCT3,PRKCSH,IGF2,HNRNPC,SPP1,NPM1,ICAM1,HNRNPK,LMNA,DKK1
GO:BP	protein refolding	GO:0042026	0.000510104	3.29234	23	217	6	18117	HSPD1,HSP90AA1,HSPA8,HSPA1B,HSPA5,HSPA9
GO:BP	regulation of catabolic process	GO:0009894	0.000524376	3.28036	1033	217	33	18117	PGAM1,CTSC,GAPDH,PSMA7,PSMB6,HSP90AB1,IDH1,HSP90AA1,PSMA3,PSMA1,HSPA8,HSPA1B,PSMA5,APP,YWHAZ,PSAP,SET,GPC3,APOE,C4BPA,APOA2,CLU,APOA1,APOC3,PCSK9,HP,PSME1,PSMB5,PSMA6,YBX1,HNRNPC,NPM1,PSMB4
GO:BP	cholesterol biosynthetic process	GO:0006695	0.000526169	3.27888	74	217	9	18117	ACAT2,FASN,RAN,APOB,APOE,APOA1,SOD1,KPNB1,ACLY
GO:BP	secondary alcohol biosynthetic process	GO:1902653	0.000526169	3.27888	74	217	9	18117	ACAT2,FASN,RAN,APOB,APOE,APOA1,SOD1,KPNB1,ACLY
GO:BP	complement activation	GO:0006956	0.000586024	3.23208	180	217	13	18117	C5,VTN,CPN1,C4BPA,CFI,C4B,F2,PROS1,C3,A2M,CLU,C2,CPN2
GO:BP	non-canonical Wnt signaling pathway	GO:0035567	0.000607879	3.21618	151	217	12	18117	PSMA7,PSMB6,PSMA3,PSMA1,CLTC,PSMA5,GPC3,PSME1,PSMB5,PSMA6,PSMB4,DKK1
GO:BP	positive regulation of cell-substrate adhesion	GO:0010811	0.000635667	3.19677	124	217	11	18117	FBLN1,FGA,NID1,P4HB,FGG,FN1,CALR,SDC4,APOA1,DAG1,FGB
GO:BP	antigen processing and presentation of exogenous antigen	GO:0019884	0.000665807	3.17665	182	217	13	18117	PSMA7,PSMB6,CTSD,PSMA3,PSMA1,CLTC,PSMA5,CALR,PDIA3,PSME1,PSMB5,PSMA6,PSMB4
GO:BP	response to interleukin-1	GO:0070555	0.000721351	3.14185	215	217	14	18117	PSMA7,PSMB6,PSMA3,PSMA1,PSMA5,APP,TFPI,FGG,PSME1,PSMB5,PSMA6,FGB,ICAM1,PSMB4
GO:BP	cell morphogenesis involved in differentiation	GO:0000904	0.000726278	3.1389	749	217	27	18117	SPTAN1,ATRN,HSP90AB1,HSP90AA1,FBLN1,ACTN4,FGA,APP,P4HB,SPTBN1,CDH2,FGG,APOE,FN1,CALR,LAMC1,RELN,APOA1,DAG1,CFL1,ACTN1,SOD1,LAMB1,DPYSL2,FGB,ALCAM,SPP1
GO:BP	cholesterol metabolic process	GO:0008203	0.000752635	3.12342	154	217	12	18117	ACAT2,FASN,RAN,APP,APOB,APOE,APOA2,APOA1,PCSK9,SOD1,KPNB1,ACLY
GO:BP	regulation of animal organ morphogenesis	GO:2000027	0.000755182	3.12195	184	217	13	18117	PSMA7,PSMB6,PSMA3,PSMA1,CLTC,PSMA5,GPC3,AGT,PSME1,PSMB5,PSMA6,PSMB4,DKK1
GO:BP	positive regulation of signal transduction	GO:0009967	0.000765449	3.11608	1598	217	43	18117	TFRC,CTSC,PSMA7,PSMB6,HSP90AB1,HSP90AA1,PSMA3,C5,PSMA1,HSPA1B,ACTN4,FGA,PSMA5,APP,VTN,GPC3,CDH2,F10,FGG,APOE,FN1,F2,SERPINF2,CALR,PDIA3,THBS1,C3,LRG1,RELN,APOA1,TF,AGT,GOT1,PSME1,PSMB5,PSMA6,SOD1,MIF,FGB,IGF2,ICAM1,PSMB4,DKK1
GO:BP	positive regulation of response to biotic stimulus	GO:0002833	0.000781383	3.10714	250	217	15	18117	XRCC5,PSMA7,PSMB6,HSPD1,HSP90AA1,PSMA3,PSMA1,XRCC6,PSMA5,PSME1,PSMB5,PSMA6,CADM1,PGC,PSMB4
GO:BP	cellular response to interleukin-1	GO:0071347	0.000803775	3.09487	185	217	13	18117	PSMA7,PSMB6,PSMA3,PSMA1,PSMA5,TFPI,FGG,PSME1,PSMB5,PSMA6,FGB,ICAM1,PSMB4
GO:BP	regulation of metabolic process	GO:0019222	0.000824381	3.08387	7148	217	122	18117	AGRN,TFRC,FASN,RAN,PGAM1,CTSC,RPSA,ALDH1A1,XRCC5,GPI,GAPDH,PSMA7,PSMB6,HSP90AB1,HSPD1,NME2,IDH1,CTSD,HSP90AA1,PGK1,FBLN1,HSPE1,RPLP2,ENO1,PSMA3,C5,PSMA1,HSPA8,HSPA1B,XRCC6,ACTN4,CLTC,PKM,HSP90B1,PSMA5,RBP4,APP,YWHAE,TFPI,EEF2,YWHAZ,PSAP,VTN,SET,GPC3,SERPINA7,SPTBN1,GSN,PTPRK,SERPINA3,APOB,APOE,C4BPA,SERPIND1,HSPA5,APOA2,C4B,FN1,F2,SERPINF2,CALR,ACTG1,ITIH2,THBS1,PROS1,C3,A2M,SERPINA5,SDC4,RELN,CL…
GO:BP	regulation of transcription from RNA polymerase II promoter in response to hypoxia	GO:0061418	0.000832972	3.07937	78	217	9	18117	PSMA7,PSMB6,PSMA3,PSMA1,PSMA5,PSME1,PSMB5,PSMA6,PSMB4
GO:BP	cellular macromolecule metabolic process	GO:0044260	0.000863622	3.06368	8390	217	137	18117	AGRN,TFRC,RAN,UBA1,CTSC,RPSA,XRCC5,GPI,GAPDH,PSMA7,PSMB6,HSP90AB1,HSPD1,EEF1G,NME2,CTSD,HSP90AA1,FBLN1,HSPE1,RPLP2,PDIA4,ENO1,PSMA3,C5,PSMA1,HSPA8,HSPA1B,XRCC6,ACTN4,CLTC,PKM,FGA,HSP90B1,PSMA5,APP,YWHAE,TFPI,EEF2,YWHAZ,VTN,SET,P4HB,GPC3,SERPINA7,SPTBN1,CDH2,GSN,PTPRK,SERPINA3,FGG,TTR,APOB,APOE,SERPIND1,HSPA5,APOA2,C4B,FN1,PROC,F2,SERPINF2,CALR,LAMC1,PDIA3,ITIH2,THBS1,PROS1,CPE,C3,A2M,SERPINA5,SDC…
GO:BP	organic hydroxy compound metabolic process	GO:1901615	0.000864357	3.06331	571	217	23	18117	ACAT2,FASN,RAN,ALDH1A1,AKR1C1,IDH1,LDHA,PSAT1,TPI1,RBP4,APP,TTR,APOB,APOE,APOA2,APOA1,PCSK9,PLTP,GOT1,SOD1,KPNB1,CTSB,ACLY
GO:BP	hexose metabolic process	GO:0019318	0.00091014	3.04089	253	217	15	18117	PGAM1,ALDH1A1,GPI,GAPDH,PGK1,ENO1,ALDOA,PKM,MDH1,TPI1,RBP4,GOT1,MDH2,IGF2,FUCA2
GO:BP	regulation of substrate adhesion-dependent cell spreading	GO:1900024	0.000927526	3.03267	58	217	8	18117	FBLN1,ACTN4,FGA,P4HB,FGG,CALR,APOA1,FGB
GO:BP	protein-containing complex subunit organization	GO:0043933	0.000932159	3.03051	1963	217	49	18117	TFRC,CTSC,SPTAN1,RPSA,HSPA4,XRCC5,HSP90AB1,HSPD1,HSP90AA1,HSPA8,ALDOA,HSPA1B,CLTC,FGA,SET,P4HB,SPTBN1,GSN,FGG,APOB,APOE,APOM,HSPA5,APOA2,FN1,CALR,LAMC1,CLU,APOA1,SERPINA1,KRT10,APOC3,ALB,AGT,F5,PLTP,CFL1,RPLP0,RPL12,MIF,UGDH,FGB,CCT8,CCT3,NASP,NPM1,ICAM1,APEH,DKK1
GO:BP	triglyceride-rich lipoprotein particle remodeling	GO:0034370	0.00093839	3.02762	14	217	5	18117	APOB,APOE,APOA2,APOA1,APOC3
GO:BP	sterol biosynthetic process	GO:0016126	0.00103754	2.984	80	217	9	18117	ACAT2,FASN,RAN,APOB,APOE,APOA1,SOD1,KPNB1,ACLY
GO:BP	regulation of cell-substrate adhesion	GO:0010810	0.00106421	2.97297	222	217	14	18117	FBLN1,ACTN4,FGA,NID1,P4HB,FGG,FN1,CALR,ACTG1,THBS1,SDC4,APOA1,DAG1,FGB
GO:BP	positive regulation of protein metabolic process	GO:0051247	0.00113922	2.94339	1564	217	42	18117	TFRC,CTSC,XRCC5,HSP90AB1,HSPD1,CTSD,HSP90AA1,FBLN1,HSPE1,ENO1,C5,HSPA1B,XRCC6,PKM,APP,EEF2,VTN,GPC3,GSN,APOE,C4BPA,HSPA5,FN1,F2,THBS1,C3,SDC4,RELN,CLU,DAG1,TF,PCSK9,AGT,PSME1,SOD1,MIF,CRLF1,IGF2,NPM1,ICAM1,LMNA,DKK1
GO:BP	protein-containing complex assembly	GO:0065003	0.00114698	2.94045	1680	217	44	18117	TFRC,CTSC,SPTAN1,RPSA,HSPA4,XRCC5,HSP90AB1,HSPD1,HSP90AA1,HSPA8,ALDOA,HSPA1B,CLTC,FGA,SET,P4HB,SPTBN1,GSN,FGG,APOB,APOE,APOM,HSPA5,APOA2,FN1,CALR,LAMC1,CLU,APOA1,SERPINA1,KRT10,APOC3,F5,RPLP0,RPL12,MIF,UGDH,FGB,CCT8,CCT3,NASP,NPM1,ICAM1,DKK1
GO:BP	response to tumor necrosis factor	GO:0034612	0.00115873	2.93602	331	217	17	18117	PSMA7,PSMB6,PSMA3,PSMA1,HSPA1B,ACTN4,PSMA5,APOB,THBS1,APOA1,KRT8,PSME1,PSMB5,PSMA6,KRT18,ICAM1,PSMB4
GO:BP	stem cell differentiation	GO:0048863	0.00116781	2.93263	258	217	15	18117	XRCC5,PSMA7,PSMB6,PSMA3,PSMA1,PSMA5,CDH2,FN1,A2M,PSME1,PSMB5,PSMA6,KRT18,HSPA9,PSMB4
GO:BP	positive regulation of cytokine production	GO:0001819	0.00120958	2.91737	452	217	20	18117	XRCC5,GAPDH,HSPD1,HSP90AA1,C5,HSPA1B,XRCC6,APP,SPTBN1,APOA2,SERPINF2,THBS1,C3,CLU,ORM2,ORM1,AGT,CADM1,SOD1,MIF
GO:BP	regulation of cellular amine metabolic process	GO:0033238	0.00128429	2.89134	82	217	9	18117	PSMA7,PSMB6,PSMA3,PSMA1,PSMA5,PSME1,PSMB5,PSMA6,PSMB4
GO:BP	negative regulation of gene expression	GO:0010629	0.00135108	2.86932	1460	217	40	18117	RAN,RPSA,GAPDH,PSMA7,PSMB6,HSP90AB1,FBLN1,RPLP2,PSMA3,PSMA1,HSPA8,HSPA1B,PSMA5,APP,YWHAZ,SET,APOE,APOA2,FN1,F2,SERPINF2,CALR,THBS1,APOA1,SERPINF1,ORM1,PSME1,PSMB5,PSMA6,SSB,ILF3,RPLP0,RPL12,MIF,YBX1,HNRNPC,NPM1,NCL,HNRNPK,PSMB4
GO:BP	NIK/NF-kappaB signaling	GO:0038061	0.00138412	2.85883	194	217	13	18117	PSMA7,PSMB6,PSMA3,PSMA1,PRDX1,ACTN4,PSMA5,APP,CALR,PSME1,PSMB5,PSMA6,PSMB4
GO:BP	nucleoside diphosphate phosphorylation	GO:0006165	0.00139181	2.85642	134	217	11	18117	PGAM1,GPI,GAPDH,NME2,PGK1,LDHA,ENO1,ALDOA,PKM,TPI1,APP
GO:BP	nucleotide phosphorylation	GO:0046939	0.00149954	2.82404	135	217	11	18117	PGAM1,GPI,GAPDH,NME2,PGK1,LDHA,ENO1,ALDOA,PKM,TPI1,APP
GO:BP	regulation of protein stability	GO:0031647	0.00153714	2.81329	300	217	16	18117	GAPDH,HSP90AB1,HSPD1,HSP90AA1,HSPA8,HSPA1B,GSN,APOA2,CALR,CLU,APOA1,CPN2,TF,CCT8,CCT3,LMNA
GO:BP	cell morphogenesis	GO:0000902	0.00174641	2.75785	1037	217	32	18117	SPTAN1,ATRN,HSP90AB1,HSP90AA1,FBLN1,ALDOA,ACTN4,FGA,APP,P4HB,SPTBN1,CDH2,FGG,APOE,FN1,F2,CALR,LAMC1,RELN,CLU,APOA1,DAG1,CFL1,CAP1,ACTN1,SOD1,LAMB1,DPYSL2,FGB,ALCAM,SPP1,ICAM1
GO:BP	anaphase-promoting complex-dependent catabolic process	GO:0031145	0.00174926	2.75714	85	217	9	18117	PSMA7,PSMB6,PSMA3,PSMA1,PSMA5,PSME1,PSMB5,PSMA6,PSMB4
GO:BP	positive regulation of cellular protein metabolic process	GO:0032270	0.00181463	2.74121	1477	217	40	18117	TFRC,CTSC,XRCC5,HSP90AB1,HSPD1,CTSD,HSP90AA1,FBLN1,HSPE1,ENO1,C5,HSPA1B,XRCC6,PKM,APP,EEF2,VTN,GSN,APOE,HSPA5,FN1,F2,THBS1,C3,SDC4,RELN,CLU,DAG1,TF,PCSK9,AGT,PSME1,SOD1,MIF,CRLF1,IGF2,NPM1,ICAM1,LMNA,DKK1
GO:BP	organic substance transport	GO:0071702	0.00183968	2.73526	2766	217	61	18117	TFRC,GLUD1,RAN,RPSA,AKR1C1,HSPA4,HSP90AB1,HSPD1,CLSTN1,IDH1,HSP90AA1,RPLP2,PDIA4,HSPA8,ACTN4,CLTC,FGA,HSP90B1,RBP4,YWHAE,YWHAZ,PSAP,GPC3,SPTBN1,FGG,APOB,APOE,APOM,APOC4-APOC2,HSPA5,APOA2,CALR,THBS1,C3,SERPINA5,CLU,APOA1,APOC3,APOH,TF,AZGP1,PCSK9,AGT,PLTP,KRT18,SSB,RPLP0,HSPA9,RPL12,ECH1,DPYSL2,FGB,YBX1,KPNB1,NASP,SPP1,NPM1,NUCB1,CSE1L,LMNA,GDI2
GO:BP	regulation of transcription from RNA polymerase II promoter in response to stress	GO:0043618	0.00192984	2.71448	111	217	10	18117	PSMA7,PSMB6,PSMA3,PSMA1,PSMA5,HSPA5,PSME1,PSMB5,PSMA6,PSMB4
GO:BP	protein localization	GO:0008104	0.00193321	2.71372	2770	217	61	18117	AGRN,TFRC,GLUD1,RAN,RPSA,HSPA4,XRCC5,HSP90AB1,HSPD1,CLSTN1,IDH1,CTSD,HSP90AA1,RPLP2,PDIA4,HSPA8,ACTN4,CLTC,FGA,HSP90B1,RBP4,YWHAE,YWHAZ,GPC3,SPTBN1,CDH2,GSN,CLSTN3,PTPRK,FGG,APOB,APOE,HSPA5,F2,CALR,ACTG1,CPE,RELN,CLU,DAG1,TF,AZGP1,AGT,KRT18,SSB,RPLP0,HSPA9,RPL12,ECH1,CUTA,FGB,YBX1,CCT8,KPNB1,CCT3,NASP,NPM1,NUCB1,CSE1L,LMNA,GDI2
GO:BP	positive regulation of cellular process	GO:0048522	0.00197707	2.70398	5757	217	103	18117	AGRN,TFRC,GLUD1,FASN,RAN,CTSC,XRCC5,GPI,PSMA7,PSMB6,HSP90AB1,HSPD1,CLSTN1,NME2,CTSD,HSP90AA1,PGK1,LDHA,FBLN1,HSPE1,ENO1,PSMA3,C5,PSMA1,HSPA8,CLIC1,HSPA1B,XRCC6,ACTN4,PKM,FGA,NID1,PSMA5,RBP4,APP,YWHAE,EEF2,YWHAZ,VTN,P4HB,GPC3,SPTBN1,CDH2,GSN,CLSTN3,F10,FGG,APOB,APOE,HSPA5,APOA2,C4B,FN1,PROC,F2,SERPINF2,CALR,LAMC1,ACTG1,PDIA3,THBS1,C3,LRG1,SDC4,RELN,CLU,APOA1,C2,AHSG,DAG1,SERPINF1,TF,PCSK9,AGT,HP,G…
GO:BP	cholesterol transport	GO:0030301	0.00209711	2.67838	112	217	10	18117	AKR1C1,APOB,APOE,APOM,APOA2,CLU,APOA1,APOC3,PCSK9,PLTP
GO:BP	positive regulation of cellular component organization	GO:0051130	0.0021255	2.67254	1153	217	34	18117	AGRN,TFRC,XRCC5,CLSTN1,NME2,HSP90AA1,HSPA1B,APP,YWHAE,YWHAZ,VTN,GPC3,GSN,CLSTN3,APOE,HSPA5,FN1,SERPINF2,C3,SDC4,RELN,CLU,APOA1,DAG1,SERPINF1,TF,PCSK9,AGT,CCT8,CCT3,IGF2,ICAM1,HNRNPK,LMNA
GO:BP	regulation of innate immune response	GO:0045088	0.00227085	2.64381	309	217	16	18117	XRCC5,PSMA7,PSMB6,HSP90AB1,HSP90AA1,PSMA3,PSMA1,XRCC6,PSMA5,APOE,A2M,PSME1,PSMB5,PSMA6,CADM1,PSMB4
GO:BP	sterol metabolic process	GO:0016125	0.00231405	2.63563	171	217	12	18117	ACAT2,FASN,RAN,APP,APOB,APOE,APOA2,APOA1,PCSK9,SOD1,KPNB1,ACLY
GO:BP	hematopoietic progenitor cell differentiation	GO:0002244	0.00246168	2.60877	172	217	12	18117	XRCC5,PSMA7,PSMB6,PSMA3,PSMA1,PSMA5,EEF2,PSME1,PSMB5,PSMA6,HSPA9,PSMB4
GO:BP	cellular component biogenesis	GO:0044085	0.00250897	2.6005	3257	217	68	18117	AGRN,TFRC,RAN,CTSC,SPTAN1,RPSA,HSPA4,XRCC5,HSP90AB1,HSPD1,CLSTN1,HSP90AA1,KRT19,HSPA8,ALDOA,HSPA1B,CLTC,TUBB4B,FGA,HSP90B1,APP,TUBB,YWHAE,YWHAZ,SET,P4HB,SPTBN1,CDH2,GSN,CLSTN3,PTPRK,FGG,APOB,APOE,APOM,HSPA5,APOA2,FN1,SERPINF2,CALR,LAMC1,ACTG1,THBS1,SDC4,CLU,APOA1,DAG1,SERPINA1,KRT10,APOC3,AGT,F5,KRT8,ACTN1,RPLP0,HSPA9,RPL12,MIF,LAMB1,UGDH,FGB,CCT8,KPNB1,CCT3,NASP,NPM1,ICAM1,DKK1
GO:BP	regulation of stem cell differentiation	GO:2000736	0.00267729	2.57231	115	217	10	18117	PSMA7,PSMB6,PSMA3,PSMA1,PSMA5,PSME1,PSMB5,PSMA6,HSPA9,PSMB4
GO:BP	glycolytic process	GO:0006096	0.00267729	2.57231	115	217	10	18117	PGAM1,GPI,GAPDH,PGK1,LDHA,ENO1,ALDOA,PKM,TPI1,APP
GO:BP	high-density lipoprotein particle clearance	GO:0034384	0.00281663	2.55027	17	217	5	18117	APOE,APOM,APOA2,APOA1,APOC3
GO:BP	positive regulation of phagocytosis	GO:0050766	0.00287766	2.54096	67	217	8	18117	APOA2,C4B,CALR,C3,APOA1,C2,AHSG,SOD1
GO:BP	ATP generation from ADP	GO:0006757	0.00289956	2.53767	116	217	10	18117	PGAM1,GPI,GAPDH,PGK1,LDHA,ENO1,ALDOA,PKM,TPI1,APP
GO:BP	glyceraldehyde-3-phosphate metabolic process	GO:0019682	0.00293422	2.53251	8	217	4	18117	ALDH1A1,TALDO1,TKT,TPI1
GO:BP	positive regulation of tau-protein kinase activity	GO:1902949	0.00293422	2.53251	8	217	4	18117	HSP90AB1,HSP90AA1,CLU,DKK1
GO:BP	regulation of DNA-templated transcription in response to stress	GO:0043620	0.00313775	2.50338	117	217	10	18117	PSMA7,PSMB6,PSMA3,PSMA1,PSMA5,HSPA5,PSME1,PSMB5,PSMA6,PSMB4
GO:BP	regulation of mRNA metabolic process	GO:1903311	0.00316331	2.49986	356	217	17	18117	PSMA7,PSMB6,PSMA3,PSMA1,HSPA8,PSMA5,YWHAZ,SET,PSME1,PSMB5,PSMA6,YBX1,HNRNPC,NPM1,NCL,HNRNPK,PSMB4
GO:BP	glucose metabolic process	GO:0006006	0.00356945	2.4474	211	217	13	18117	PGAM1,GPI,GAPDH,PGK1,ENO1,ALDOA,PKM,MDH1,TPI1,RBP4,GOT1,MDH2,IGF2
GO:BP	anion transport	GO:0006820	0.00368259	2.43385	2889	217	62	18117	TFRC,GLUD1,RAN,RPSA,AKR1C1,HSPA4,HSP90AB1,HSPD1,CLSTN1,IDH1,HSP90AA1,RPLP2,PDIA4,HSPA8,CLIC1,ACTN4,CLTC,FGA,HSP90B1,RBP4,YWHAE,YWHAZ,PSAP,GPC3,SPTBN1,FGG,APOB,APOE,APOM,APOC4-APOC2,HSPA5,APOA2,CALR,THBS1,C3,SERPINA5,CLU,APOA1,APOC3,APOH,TF,AZGP1,PCSK9,AGT,PLTP,KRT18,SSB,RPLP0,HSPA9,RPL12,ECH1,DPYSL2,FGB,YBX1,KPNB1,NASP,SPP1,NPM1,NUCB1,CSE1L,LMNA,GDI2
GO:BP	cell cycle G2/M phase transition	GO:0044839	0.00373084	2.42819	283	217	15	18117	PSMA7,PSMB6,HSP90AA1,PSMA3,PSMA1,TUBB4B,PSMA5,APP,TUBB,YWHAE,PSME1,PSMB5,PSMA6,NPM1,PSMB4
GO:BP	membrane organization	GO:0061024	0.00408725	2.38857	973	217	30	18117	AGRN,TFRC,CTSC,HSPA4,HSP90AA1,HSPA8,CLTC,YWHAE,YWHAZ,SPTBN1,CDH2,GSN,APOB,APOE,APOA2,CALR,ACTG1,THBS1,C3,SERPINA5,RELN,CLU,APOA1,SERPINA1,TF,F5,PLTP,HSPA9,SOD1,LMNA
GO:BP	regulation of vesicle-mediated transport	GO:0060627	0.00441537	2.35503	536	217	21	18117	FGA,VTN,GPC3,FGG,APOE,APOA2,C4B,CALR,C3,SDC4,CLU,APOA1,C2,AHSG,APOC3,TF,PCSK9,SOD1,FGB,HNRNPK,DKK1
GO:BP	SCF-dependent proteasomal ubiquitin-dependent protein catabolic process	GO:0031146	0.00450169	2.34662	95	217	9	18117	PSMA7,PSMB6,PSMA3,PSMA1,PSMA5,PSME1,PSMB5,PSMA6,PSMB4
GO:BP	positive regulation of innate immune response	GO:0045089	0.00463349	2.33409	216	217	13	18117	XRCC5,PSMA7,PSMB6,HSP90AA1,PSMA3,PSMA1,XRCC6,PSMA5,PSME1,PSMB5,PSMA6,CADM1,PSMB4
GO:BP	establishment of protein localization to organelle	GO:0072594	0.00473289	2.32487	584	217	22	18117	RAN,RPSA,HSPA4,HSP90AB1,HSPD1,IDH1,HSP90AA1,RPLP2,HSPA8,YWHAE,YWHAZ,HSPA5,CLU,AGT,RPLP0,RPL12,ECH1,CCT8,KPNB1,CCT3,CSE1L,LMNA
GO:BP	ADP metabolic process	GO:0046031	0.00495827	2.30467	123	217	10	18117	PGAM1,GPI,GAPDH,PGK1,LDHA,ENO1,ALDOA,PKM,TPI1,APP
GO:BP	aging	GO:0007568	0.00514186	2.28888	329	217	16	18117	CTSC,APP,EEF2,GSN,CALR,DAG1,SERPINF1,AGT,IGFBP1,SOD1,MIF,YBX1,NPM1,ICAM1,LMNA,DKK1
GO:BP	carbohydrate derivative metabolic process	GO:1901135	0.00515904	2.28743	1145	217	33	18117	AGRN,FASN,RAN,AHCY,PGAM1,ALDH1A1,AKR1C1,GPI,GAPDH,NME2,PGK1,LDHA,TALDO1,ENO1,ATIC,ALDOA,CLTC,PKM,TKT,TPI1,APP,PSAP,GPC3,PAICS,ITIH2,SDC4,ITIH3,UGDH,PRKCSH,FUCA2,LARGE1,ACLY,VCAN
GO:BP	oxaloacetate metabolic process	GO:0006107	0.00523199	2.28133	9	217	4	18117	MDH1,GOT1,MDH2,ACLY
GO:BP	positive regulation of cholesterol esterification	GO:0010873	0.00523199	2.28133	9	217	4	18117	APOE,APOA2,APOA1,AGT
GO:BP	regulation of cell morphogenesis involved in differentiation	GO:0010769	0.00536341	2.27056	97	217	9	18117	FBLN1,ACTN4,FGA,P4HB,FGG,CALR,RELN,APOA1,FGB
GO:BP	response to metal ion	GO:0010038	0.00553533	2.25686	371	217	17	18117	GPI,GGH,FGA,APP,GSN,FGG,HSPA5,CALR,ACTG1,THBS1,SERPINF1,TF,GOT1,SOD1,CUTA,FGB,ICAM1
GO:BP	sterol transport	GO:0015918	0.00574159	2.24097	125	217	10	18117	AKR1C1,APOB,APOE,APOM,APOA2,CLU,APOA1,APOC3,PCSK9,PLTP
GO:BP	regulation of response to biotic stimulus	GO:0002831	0.00603951	2.219	415	217	18	18117	XRCC5,PSMA7,PSMB6,HSP90AB1,HSPD1,HSP90AA1,PSMA3,PSMA1,XRCC6,PSMA5,APOE,A2M,PSME1,PSMB5,PSMA6,CADM1,PGC,PSMB4
GO:BP	dicarboxylic acid metabolic process	GO:0043648	0.00636348	2.19631	99	217	9	18117	GLUD1,QPRT,IDH1,ATIC,MDH1,GOT1,MDH2,ACLY,FH
GO:BP	cell development	GO:0048468	0.0066171	2.17933	2100	217	49	18117	AGRN,FASN,SPTAN1,XRCC5,ATRN,HSP90AB1,NME2,HSP90AA1,KRT19,FBLN1,ACTN4,FGA,APP,YWHAZ,P4HB,SPTBN1,CDH2,GSN,PTPRK,FGG,APOE,HSPA5,FN1,PROC,F2,CALR,LAMC1,ACTG1,C3,SDC4,RELN,CLU,APOA1,DAG1,SERPINF1,AGT,CFL1,KRT8,ACTN1,SOD1,LAMB1,UGDH,DPYSL2,FGB,ALCAM,PRKCSH,SPP1,ICAM1,LMNA
GO:BP	regulation of canonical Wnt signaling pathway	GO:0060828	0.00704852	2.1519	298	217	15	18117	PSMA7,PSMB6,PSMA3,PSMA1,PSMA5,GPC3,CDH2,APOE,NOTUM,PSME1,PSMB5,PSMA6,IGFBP1,PSMB4,DKK1
GO:BP	nucleoside diphosphate metabolic process	GO:0009132	0.00708438	2.1497	158	217	11	18117	PGAM1,GPI,GAPDH,NME2,PGK1,LDHA,ENO1,ALDOA,PKM,TPI1,APP
GO:BP	regulation of cell differentiation	GO:0045595	0.0071798	2.14389	1679	217	42	18117	XRCC5,PSMA7,PSMB6,HSP90AB1,NME2,FBLN1,PSMA3,PSMA1,CLIC1,HSPA1B,XRCC6,ACTN4,FGA,PSMA5,APP,P4HB,CDH2,FGG,APOB,FN1,PROC,F2,SERPINF2,CALR,THBS1,RELN,APOA1,DAG1,SERPINF1,VASN,AGT,PSME1,PSMB5,PSMA6,HSPA9,SOD1,DPYSL2,FGB,IGF2,SPP1,PSMB4,DKK1
GO:BP	response to oxygen-containing compound	GO:1901700	0.00720513	2.14236	1739	217	43	18117	AGRN,AKR1C1,XRCC5,GPI,HSP90AB1,HSPD1,NME2,LDHA,PRDX1,GGH,PKM,HSP90B1,RBP4,APP,TFPI,EEF2,GSN,PTPRK,APOB,APOE,APOM,HSPA5,APOA2,CALR,THBS1,CLU,AHSG,DAG1,SERPINF1,PCSK9,AGT,HP,GOT1,PRDX3,KRT8,KRT18,IGFBP1,SOD1,DPYSL2,IGF2,NASP,SPP1,ICAM1
GO:BP	negative regulation of G2/M transition of mitotic cell cycle	GO:0010972	0.0081629	2.08816	102	217	9	18117	PSMA7,PSMB6,PSMA3,PSMA1,PSMA5,PSME1,PSMB5,PSMA6,PSMB4
GO:BP	protein stabilization	GO:0050821	0.00822289	2.08498	193	217	12	18117	GAPDH,HSP90AB1,HSPD1,HSP90AA1,HSPA1B,APOA2,CALR,CLU,APOA1,CPN2,CCT8,CCT3
GO:BP	positive regulation of developmental process	GO:0051094	0.00862065	2.06446	1341	217	36	18117	AGRN,TFRC,XRCC5,HSP90AB1,CLSTN1,NME2,C5,CLIC1,HSPA1B,XRCC6,PKM,FGA,P4HB,CDH2,CLSTN3,FGG,APOB,APOE,FN1,PROC,SERPINF2,CALR,THBS1,C3,LRG1,RELN,APOA1,DAG1,KRT10,SERPINF1,AGT,CFL1,FGB,IGF2,LMNA,DKK1
GO:BP	negative regulation of fibrinolysis	GO:0051918	0.00863809	2.06358	10	217	4	18117	F2,SERPINF2,THBS1,APOH
GO:BP	G2/M transition of mitotic cell cycle	GO:0000086	0.00865429	2.06277	265	217	14	18117	PSMA7,PSMB6,HSP90AA1,PSMA3,PSMA1,TUBB4B,PSMA5,APP,TUBB,YWHAE,PSME1,PSMB5,PSMA6,PSMB4
GO:BP	lipid metabolic process	GO:0006629	0.00878859	2.05608	1457	217	38	18117	AGRN,ACAT2,FASN,RAN,ALDH1A1,AKR1C1,IDH1,RBP4,APP,PSAP,GPC3,SERPINA3,TTR,APOB,APOE,APOM,APOC4-APOC2,APOA2,F2,C3,SDC4,CLU,APOA1,SERPINA6,APOC3,AFP,APOH,PCSK9,AGT,PLTP,SOD1,ECH1,MIF,DHRS2,KPNB1,SPP1,LARGE1,ACLY
GO:BP	chaperone-mediated protein complex assembly	GO:0051131	0.00890737	2.05025	21	217	5	18117	HSPA4,HSP90AB1,HSPD1,HSP90AA1,CLU
GO:BP	cellular macromolecule catabolic process	GO:0044265	0.00904116	2.04378	1231	217	34	18117	UBA1,CTSC,RPSA,PSMA7,PSMB6,HSP90AB1,HSP90AA1,RPLP2,PSMA3,PSMA1,HSPA8,HSPA1B,CLTC,HSP90B1,PSMA5,YWHAZ,SET,APOE,HSPA5,RNASET2,CLU,PCSK9,PSME1,PSMB5,PSMA6,SSB,RPLP0,RPL12,YBX1,KPNB1,HNRNPC,NPM1,CTSB,PSMB4
GO:BP	reproductive structure development	GO:0048608	0.00958698	2.01832	429	217	18	18117	HSP90AB1,IDH1,KRT19,RBP4,PSAP,HSPA5,C3,SERPINA5,SERPINF1,AFP,PRDX3,KRT8,SOD1,IGF2,NASP,SPP1,ICAM1,CTSB
GO:BP	protein maturation	GO:0051604	0.00973315	2.01175	306	217	15	18117	HSPD1,PGK1,ENO1,FGA,CPN1,GSN,FGG,SERPINF2,CALR,THBS1,CPE,APOH,PCSK9,HP,FGB
GO:BP	cellular component organization	GO:0016043	0.00982744	2.00756	6566	217	111	18117	AGRN,TFRC,RAN,CTSC,SPTAN1,RPSA,HSPA4,XRCC5,GAPDH,HSP90AB1,HSPD1,CLSTN1,NME2,IDH1,HSP90AA1,KRT19,FBLN1,ENO1,HSPA8,TUBA1B,ALDOA,HSPA1B,XRCC6,CLTC,TUBB4B,FGA,HSP90B1,TPM3,NID1,APP,TUBB,YWHAE,YWHAZ,VTN,SET,P4HB,GPC3,SPTBN1,CDH2,GSN,CLSTN3,FLNB,PTPRK,FGG,TTR,APOB,APOE,APOM,HSPA5,APOA2,FN1,F2,SERPINF2,CALR,LAMC1,ACTG1,THBS1,C3,A2M,SERPINA5,SDC4,RELN,CLU,APOA1,MATN3,DAG1,SERPINA1,KRT10,SERPINF1,APOC3,AL…
GO:BP	cellular response to stimulus	GO:0051716	0.0103017	1.98709	7781	217	126	18117	AGRN,TFRC,FASN,UBA1,CTSC,SPTAN1,AKR1C1,XRCC5,GPI,GAPDH,PSMA7,PSMB6,HSP90AB1,HSPD1,NME2,HSP90AA1,KRT19,PGK1,FBLN1,TALDO1,GSR,PDIA4,ENO1,ATIC,PSMA3,C5,PSMA1,HSPA8,TUBA1B,CLIC1,PRDX1,HSPA1B,XRCC6,ACTN4,CLTC,PKM,FGA,HSP90B1,PSMA5,APP,YWHAE,TFPI,EEF2,YWHAZ,PSAP,VTN,P4HB,GPC3,SPTBN1,CDH2,GSN,FLNB,PTPRK,F10,FGG,TTR,APOB,APOE,APOM,HSPA5,FN1,F2,SERPINF2,CALR,ACTG1,PDIA3,THBS1,CPE,C3,LRG1,A2M,LGALS3BP,RELN…
GO:BP	interleukin-1-mediated signaling pathway	GO:0070498	0.0103831	1.98367	105	217	9	18117	PSMA7,PSMB6,PSMA3,PSMA1,PSMA5,PSME1,PSMB5,PSMA6,PSMB4
GO:BP	reproductive system development	GO:0061458	0.0105569	1.97646	432	217	18	18117	HSP90AB1,IDH1,KRT19,RBP4,PSAP,HSPA5,C3,SERPINA5,SERPINF1,AFP,PRDX3,KRT8,SOD1,IGF2,NASP,SPP1,ICAM1,CTSB
GO:BP	intracellular transport	GO:0046907	0.0108362	1.96512	1767	217	43	18117	RAN,CTSC,SPTAN1,RPSA,HSPA4,HSP90AB1,HSPD1,IDH1,HSP90AA1,RPLP2,HSPA8,TUBA1B,ACTN4,CLTC,HSP90B1,APP,TUBB,YWHAE,YWHAZ,SPTBN1,F10,APOE,HSPA5,PROC,F2,CALR,PROS1,CLU,SERPINA1,PCSK9,AGT,F5,SSB,RPLP0,HSPA9,SOD1,RPL12,ECH1,KPNB1,NPM1,NUCB1,CSE1L,LMNA
GO:BP	regulation of cell morphogenesis	GO:0022604	0.0109546	1.9604	309	217	15	18117	FBLN1,ALDOA,ACTN4,FGA,P4HB,FGG,FN1,F2,CALR,RELN,APOA1,DAG1,CFL1,FGB,ICAM1
GO:BP	cellular ketone metabolic process	GO:0042180	0.0112045	1.95061	271	217	14	18117	AKR1C1,PSMA7,PSMB6,PSMA3,PSMA1,PSMA5,TPI1,APOA1,APOC3,AFP,PSME1,PSMB5,PSMA6,PSMB4
GO:BP	organonitrogen compound catabolic process	GO:1901565	0.0114441	1.94142	1358	217	36	18117	AGRN,GLUD1,UBA1,AHCY,CTSC,PSMA7,PSMB6,QPRT,HSP90AB1,CTSD,HSP90AA1,PSMA3,PSMA1,HSPA8,HSPA1B,CLTC,HSP90B1,PSMA5,CPN1,GPC3,APOB,APOE,C4BPA,HSPA5,SDC4,CLU,AMBP,NOTUM,PCSK9,GOT1,PSME1,PSMB5,PSMA6,CTSB,PSMB4,VCAN
GO:BP	protein processing	GO:0016485	0.0117081	1.93151	235	217	13	18117	PGK1,ENO1,FGA,CPN1,GSN,FGG,SERPINF2,THBS1,CPE,APOH,PCSK9,HP,FGB
GO:BP	lipid transport	GO:0006869	0.0119595	1.92229	480	217	19	18117	AKR1C1,RBP4,PSAP,APOB,APOE,APOM,APOC4-APOC2,APOA2,THBS1,SERPINA5,CLU,APOA1,APOC3,APOH,PCSK9,AGT,PLTP,DPYSL2,SPP1
GO:BP	purine ribonucleoside diphosphate metabolic process	GO:0009179	0.0122741	1.91101	136	217	10	18117	PGAM1,GPI,GAPDH,PGK1,LDHA,ENO1,ALDOA,PKM,TPI1,APP
GO:BP	purine nucleoside diphosphate metabolic process	GO:0009135	0.0122741	1.91101	136	217	10	18117	PGAM1,GPI,GAPDH,PGK1,LDHA,ENO1,ALDOA,PKM,TPI1,APP
GO:BP	regulation of lipid localization	GO:1905952	0.0124877	1.90352	201	217	12	18117	APOB,APOE,APOA2,THBS1,C3,APOA1,APOC3,PCSK9,AGT,PLTP,DPYSL2,SPP1
GO:BP	regulation of primary metabolic process	GO:0080090	0.0130212	1.88535	6053	217	104	18117	AGRN,TFRC,FASN,RAN,PGAM1,CTSC,XRCC5,GPI,GAPDH,PSMA7,PSMB6,HSP90AB1,HSPD1,NME2,IDH1,CTSD,HSP90AA1,FBLN1,HSPE1,ENO1,PSMA3,C5,PSMA1,HSPA8,HSPA1B,XRCC6,ACTN4,CLTC,PKM,HSP90B1,PSMA5,APP,YWHAE,TFPI,EEF2,YWHAZ,PSAP,VTN,SET,GPC3,SERPINA7,GSN,PTPRK,SERPINA3,APOB,APOE,C4BPA,SERPIND1,HSPA5,APOA2,C4B,FN1,F2,SERPINF2,CALR,ITIH2,THBS1,PROS1,C3,A2M,SERPINA5,SDC4,RELN,CLU,APOA1,SERPINA6,AHSG,DAG1,SERPINA1,AMBP,S…
GO:BP	regulation of macromolecule metabolic process	GO:0060255	0.0132249	1.87861	6603	217	111	18117	AGRN,TFRC,RAN,PGAM1,CTSC,RPSA,XRCC5,GPI,GAPDH,PSMA7,PSMB6,HSP90AB1,HSPD1,NME2,CTSD,HSP90AA1,FBLN1,HSPE1,RPLP2,ENO1,PSMA3,C5,PSMA1,HSPA8,HSPA1B,XRCC6,ACTN4,CLTC,PKM,HSP90B1,PSMA5,RBP4,APP,YWHAE,TFPI,EEF2,YWHAZ,VTN,SET,GPC3,SERPINA7,SPTBN1,GSN,PTPRK,SERPINA3,APOB,APOE,C4BPA,SERPIND1,HSPA5,APOA2,C4B,FN1,F2,SERPINF2,CALR,ACTG1,ITIH2,THBS1,PROS1,C3,A2M,SERPINA5,SDC4,RELN,CLU,APOA1,SERPINA6,AHSG,DAG1,S…
GO:BP	lipid localization	GO:0010876	0.0136865	1.86371	530	217	20	18117	AKR1C1,RBP4,PSAP,APOB,APOE,APOM,APOC4-APOC2,APOA2,THBS1,C3,SERPINA5,CLU,APOA1,APOC3,APOH,PCSK9,AGT,PLTP,DPYSL2,SPP1
GO:BP	cell surface receptor signaling pathway	GO:0007166	0.0139466	1.85553	3210	217	65	18117	PSMA7,PSMB6,HSP90AB1,NME2,HSP90AA1,KRT19,TALDO1,PSMA3,C5,PSMA1,HSPA8,HSPA1B,ACTN4,CLTC,FGA,HSP90B1,PSMA5,APP,YWHAZ,VTN,P4HB,GPC3,SPTBN1,CDH2,PTPRK,FGG,APOE,HSPA5,FN1,F2,ACTG1,PDIA3,THBS1,CPE,C3,LRG1,RELN,APOA1,AHSG,AFP,NOTUM,VASN,TF,AGT,GOT1,CFL1,KRT8,PSME1,PSMB5,PSMA6,KRT18,RPLP0,HSPA9,IGFBP1,SOD1,MIF,FGB,YBX1,CRLF1,IGF2,ICAM1,LMNB1,LMNA,PSMB4,DKK1
GO:BP	negative regulation of very-low-density lipoprotein particle remodeling	GO:0010903	0.0146084	1.8354	4	217	3	18117	APOA2,APOA1,APOC3
GO:BP	positive regulation of amyloid fibril formation	GO:1905908	0.0146084	1.8354	4	217	3	18117	APP,APOE,CLU
GO:BP	establishment of protein localization	GO:0045184	0.0146605	1.83385	2035	217	47	18117	TFRC,GLUD1,RAN,RPSA,HSPA4,HSP90AB1,HSPD1,CLSTN1,IDH1,CTSD,HSP90AA1,RPLP2,PDIA4,HSPA8,ACTN4,CLTC,FGA,HSP90B1,RBP4,YWHAE,YWHAZ,SPTBN1,FGG,APOB,APOE,HSPA5,CALR,CLU,TF,AZGP1,AGT,KRT18,SSB,RPLP0,HSPA9,RPL12,ECH1,FGB,CCT8,KPNB1,CCT3,NASP,NPM1,NUCB1,CSE1L,LMNA,GDI2
GO:BP	ribonucleoside diphosphate metabolic process	GO:0009185	0.0149097	1.82653	139	217	10	18117	PGAM1,GPI,GAPDH,PGK1,LDHA,ENO1,ALDOA,PKM,TPI1,APP
GO:BP	protein import	GO:0017038	0.0152718	1.81611	205	217	12	18117	RAN,HSPA4,HSP90AB1,HSPD1,HSP90AA1,HSPA8,APOE,CLU,AGT,KPNB1,CSE1L,LMNA
GO:BP	'de novo' protein folding	GO:0006458	0.0163654	1.78607	40	217	6	18117	HSPD1,HSPE1,HSPA8,HSPA1B,HSPA5,HSPA9
GO:BP	positive regulation of metabolic process	GO:0009893	0.0166612	1.77829	3783	217	73	18117	AGRN,TFRC,FASN,CTSC,XRCC5,GPI,GAPDH,HSP90AB1,HSPD1,NME2,CTSD,HSP90AA1,PGK1,FBLN1,HSPE1,ENO1,C5,HSPA8,HSPA1B,XRCC6,ACTN4,PKM,RBP4,APP,EEF2,VTN,GPC3,SPTBN1,GSN,APOB,APOE,C4BPA,HSPA5,APOA2,FN1,F2,SERPINF2,CALR,ACTG1,THBS1,C3,SDC4,RELN,CLU,APOA1,DAG1,ORM2,ORM1,TF,PCSK9,AGT,PSME1,ACTN1,ILF3,CADM1,SOD1,MIF,YBX1,CRLF1,CCT8,CCT3,IGF2,HNRNPC,SPP1,NPM1,ICAM1,NCL,PGC,HNRNPK,LMNA,ACLY,FH,DKK1
GO:BP	chaperone-mediated protein folding	GO:0061077	0.0175896	1.75474	61	217	7	18117	HSPE1,PDIA4,HSPA8,HSPA1B,HSPA5,CLU,HSPA9
GO:BP	stimulatory C-type lectin receptor signaling pathway	GO:0002223	0.0176612	1.75298	112	217	9	18117	PSMA7,PSMB6,PSMA3,PSMA1,PSMA5,PSME1,PSMB5,PSMA6,PSMB4
GO:BP	regulation of signal transduction	GO:0009966	0.0178093	1.74935	3165	217	64	18117	TFRC,CTSC,PSMA7,PSMB6,HSP90AB1,HSP90AA1,FBLN1,ENO1,PSMA3,C5,PSMA1,PRDX1,HSPA1B,ACTN4,FGA,PSMA5,APP,YWHAZ,VTN,P4HB,GPC3,SPTBN1,CDH2,F10,FGG,APOE,HSPA5,FN1,F2,SERPINF2,CALR,PDIA3,THBS1,C3,LRG1,A2M,RELN,CLU,APOA1,AHSG,DAG1,AMBP,APOC3,NOTUM,VASN,TF,PCSK9,AGT,GOT1,PEBP1,PSME1,PSMB5,PSMA6,IGFBP1,SOD1,MIF,FGB,IGF2,ICAM1,HNRNPK,LMNA,PSMB4,GDI2,DKK1
GO:BP	regulation of apoptotic signaling pathway	GO:2001233	0.0179602	1.74569	363	217	16	18117	CTSC,ENO1,HSPA1B,FGA,P4HB,FGG,PDIA3,THBS1,CLU,AGT,SOD1,MIF,FGB,ICAM1,HNRNPK,LMNA
GO:BP	carbohydrate metabolic process	GO:0005975	0.018035	1.74388	635	217	22	18117	PGAM1,ALDH1A1,GPI,GAPDH,IDH1,PGK1,LDHA,TALDO1,ENO1,ALDOA,CLTC,PKM,MDH1,TKT,TPI1,RBP4,APP,GOT1,MDH2,UGDH,IGF2,FUCA2
GO:BP	supramolecular fiber organization	GO:0097435	0.0181702	1.74064	734	217	24	18117	SPTAN1,HSP90AB1,KRT19,HSPA8,ALDOA,HSPA1B,HSP90B1,TPM3,APP,SPTBN1,GSN,APOE,SERPINF2,ACTG1,SDC4,CLU,APOA1,TF,KRT9,CFL1,KRT8,ACTN1,KPNB1,ICAM1
GO:BP	negative regulation of cell cycle G2/M phase transition	GO:1902750	0.0189925	1.72142	113	217	9	18117	PSMA7,PSMB6,PSMA3,PSMA1,PSMA5,PSME1,PSMB5,PSMA6,PSMB4
GO:BP	phospholipid efflux	GO:0033700	0.0199808	1.69939	12	217	4	18117	APOE,APOA2,APOA1,APOC3
GO:BP	very-low-density lipoprotein particle remodeling	GO:0034372	0.0199808	1.69939	12	217	4	18117	APOE,APOA2,APOA1,APOC3
GO:BP	intracellular signal transduction	GO:0035556	0.0201432	1.69587	2772	217	58	18117	TFRC,SPTAN1,PSMA7,PSMB6,HSP90AB1,HSP90AA1,FBLN1,ENO1,PSMA3,C5,PSMA1,PRDX1,HSPA1B,ACTN4,FGA,PSMA5,APP,YWHAE,YWHAZ,P4HB,SPTBN1,CDH2,GSN,F10,FGG,APOE,FN1,F2,SERPINF2,CALR,THBS1,A2M,RELN,CLU,APOA1,DAG1,AMBP,APOC3,TF,AGT,PEBP1,CFL1,PSME1,PSMB5,PSMA6,CAP1,SOD1,MIF,FGB,KPNB1,PRKCSH,IGF2,ICAM1,HNRNPK,NUCB1,PSMB4,GDI2,DKK1
GO:BP	regulation of synapse organization	GO:0050807	0.0214717	1.66813	212	217	12	18117	AGRN,CLSTN1,HSPA8,APP,TUBB,YWHAZ,CDH2,CLSTN3,APOE,RELN,DAG1,CFL1
GO:BP	innate immune response activating cell surface receptor signaling pathway	GO:0002220	0.0219143	1.65927	115	217	9	18117	PSMA7,PSMB6,PSMA3,PSMA1,PSMA5,PSME1,PSMB5,PSMA6,PSMB4
GO:BP	positive regulation of substrate adhesion-dependent cell spreading	GO:1900026	0.0219242	1.65908	42	217	6	18117	FGA,P4HB,FGG,CALR,APOA1,FGB
GO:BP	negative regulation of nitrogen compound metabolic process	GO:0051172	0.0225695	1.64648	2518	217	54	18117	XRCC5,GPI,GAPDH,HSP90AB1,FBLN1,ENO1,C5,HSPA8,HSPA1B,XRCC6,CLTC,APP,YWHAE,TFPI,VTN,SET,GPC3,SERPINA7,PTPRK,SERPINA3,APOE,SERPIND1,C4B,F2,SERPINF2,CALR,ITIH2,THBS1,PROS1,C3,A2M,SERPINA5,CLU,SERPINA6,AHSG,SERPINA1,AMBP,SERPINF1,ITIH3,SERPINC1,AGT,PEBP1,PRDX3,ILF3,SERPINA11,YBX1,APLP2,IGF2,HNRNPC,NPM1,NCL,HNRNPK,SERPINA4,DKK1
GO:BP	amide transport	GO:0042886	0.0230129	1.63803	2007	217	46	18117	TFRC,GLUD1,RAN,RPSA,HSPA4,HSP90AB1,HSPD1,CLSTN1,IDH1,HSP90AA1,RPLP2,PDIA4,HSPA8,ACTN4,CLTC,FGA,HSP90B1,RBP4,YWHAE,YWHAZ,PSAP,SPTBN1,FGG,APOB,APOE,HSPA5,CALR,CLU,TF,AZGP1,AGT,PLTP,KRT18,SSB,RPLP0,HSPA9,RPL12,ECH1,FGB,KPNB1,NASP,NPM1,NUCB1,CSE1L,LMNA,GDI2
GO:BP	negative regulation of cellular metabolic process	GO:0031324	0.0234026	1.63074	2719	217	57	18117	XRCC5,GPI,GAPDH,HSP90AB1,HSPD1,FBLN1,ENO1,C5,HSPA8,HSPA1B,XRCC6,APP,YWHAE,TFPI,VTN,SET,GPC3,SERPINA7,PTPRK,SERPINA3,APOE,SERPIND1,C4B,F2,SERPINF2,CALR,ITIH2,THBS1,PROS1,C3,A2M,SERPINA5,CLU,SERPINA6,AHSG,SERPINA1,AMBP,SERPINF1,ITIH3,APOC3,SERPINC1,PCSK9,AGT,HP,PEBP1,PRDX3,ILF3,SERPINA11,YBX1,APLP2,IGF2,HNRNPC,NPM1,NCL,HNRNPK,SERPINA4,DKK1
GO:BP	innate immune response-activating signal transduction	GO:0002758	0.0235136	1.62868	116	217	9	18117	PSMA7,PSMB6,PSMA3,PSMA1,PSMA5,PSME1,PSMB5,PSMA6,PSMB4
GO:BP	regulation of cell communication	GO:0010646	0.0248183	1.60523	3543	217	69	18117	TFRC,GLUD1,CTSC,PSMA7,PSMB6,HSP90AB1,CLSTN1,HSP90AA1,FBLN1,ENO1,PSMA3,C5,PSMA1,PRDX1,HSPA1B,ACTN4,FGA,PSMA5,RBP4,APP,YWHAZ,VTN,P4HB,GPC3,SPTBN1,CDH2,CLSTN3,F10,FGG,APOE,HSPA5,FN1,F2,SERPINF2,CALR,PDIA3,THBS1,C3,LRG1,A2M,RELN,CLU,APOA1,AHSG,DAG1,AMBP,APOC3,NOTUM,VASN,TF,PCSK9,AGT,GOT1,PEBP1,PSME1,PSMB5,PSMA6,IGFBP1,SOD1,MIF,FGB,IGF2,SPP1,ICAM1,HNRNPK,LMNA,PSMB4,GDI2,DKK1
GO:BP	positive regulation of macromolecule metabolic process	GO:0010604	0.0273194	1.56353	3483	217	68	18117	AGRN,TFRC,CTSC,XRCC5,GPI,GAPDH,HSP90AB1,HSPD1,NME2,CTSD,HSP90AA1,FBLN1,HSPE1,ENO1,C5,HSPA8,HSPA1B,XRCC6,ACTN4,PKM,RBP4,APP,EEF2,VTN,GPC3,SPTBN1,GSN,APOB,APOE,C4BPA,HSPA5,APOA2,FN1,F2,SERPINF2,CALR,ACTG1,THBS1,C3,SDC4,RELN,CLU,DAG1,ORM2,ORM1,TF,PCSK9,AGT,PSME1,ACTN1,ILF3,CADM1,SOD1,MIF,YBX1,CRLF1,CCT8,CCT3,IGF2,HNRNPC,SPP1,NPM1,ICAM1,NCL,PGC,HNRNPK,LMNA,DKK1
GO:BP	protein localization to organelle	GO:0033365	0.027676	1.5579	1017	217	29	18117	TFRC,RAN,RPSA,HSPA4,XRCC5,HSP90AB1,HSPD1,IDH1,HSP90AA1,RPLP2,HSPA8,YWHAE,YWHAZ,HSPA5,F2,CALR,CLU,DAG1,AGT,SSB,RPLP0,RPL12,ECH1,YBX1,CCT8,KPNB1,CCT3,CSE1L,LMNA
GO:BP	regulation of Wnt signaling pathway	GO:0030111	0.0278277	1.55552	376	217	16	18117	PSMA7,PSMB6,PSMA3,PSMA1,PSMA5,APP,GPC3,CDH2,APOE,NOTUM,PSME1,PSMB5,PSMA6,IGFBP1,PSMB4,DKK1
GO:BP	regulation of tau-protein kinase activity	GO:1902947	0.0285904	1.54378	13	217	4	18117	HSP90AB1,HSP90AA1,CLU,DKK1
GO:BP	regulation of cytokine production	GO:0001817	0.0287236	1.54176	806	217	25	18117	XRCC5,GAPDH,HSP90AB1,HSPD1,HSP90AA1,FBLN1,C5,HSPA1B,XRCC6,APP,SPTBN1,APOA2,FN1,F2,SERPINF2,THBS1,C3,CLU,APOA1,ORM2,ORM1,AGT,CADM1,SOD1,MIF
GO:BP	response to oxidative stress	GO:0006979	0.0296283	1.52829	466	217	18	18117	ATRN,HSPD1,NME2,IDH1,LDHA,GSR,PRDX1,HSPA1B,APP,EEF2,P4HB,PTPRK,APOE,HP,PRDX3,PSMB5,SOD1,DHRS2
GO:BP	cholesterol efflux	GO:0033344	0.0298489	1.52507	66	217	7	18117	APOB,APOE,APOM,APOA2,APOA1,APOC3,PLTP
GO:BP	positive regulation of Wnt signaling pathway	GO:0030177	0.0303808	1.5174	184	217	11	18117	PSMA7,PSMB6,PSMA3,PSMA1,PSMA5,GPC3,PSME1,PSMB5,PSMA6,PSMB4,DKK1
GO:BP	pyruvate metabolic process	GO:0006090	0.0309516	1.50932	151	217	10	18117	PGAM1,GPI,GAPDH,PGK1,LDHA,ENO1,ALDOA,PKM,TPI1,APP
GO:BP	positive regulation of canonical Wnt signaling pathway	GO:0090263	0.0309516	1.50932	151	217	10	18117	PSMA7,PSMB6,PSMA3,PSMA1,PSMA5,GPC3,PSME1,PSMB5,PSMA6,PSMB4
GO:BP	negative regulation of signal transduction	GO:0009968	0.0318039	1.49752	1364	217	35	18117	PSMA7,PSMB6,FBLN1,ENO1,PSMA3,PSMA1,HSPA1B,FGA,PSMA5,GPC3,CDH2,FGG,APOE,HSPA5,CALR,THBS1,CLU,APOA1,AHSG,DAG1,AMBP,NOTUM,VASN,AGT,PEBP1,PSME1,PSMB5,PSMA6,IGFBP1,MIF,FGB,ICAM1,LMNA,PSMB4,DKK1
GO:BP	cytoskeleton organization	GO:0007010	0.0320583	1.49406	1423	217	36	18117	AGRN,RAN,SPTAN1,GAPDH,KRT19,TUBA1B,ALDOA,HSPA1B,CLTC,TUBB4B,HSP90B1,TPM3,TUBB,SPTBN1,GSN,FLNB,APOE,SERPINF2,CALR,ACTG1,SDC4,APOA1,DAG1,TF,KRT9,CFL1,KRT8,KRT18,CAP1,ACTN1,SOD1,DPYSL2,KPNB1,NPM1,ICAM1,LMNA
GO:BP	protein catabolic process	GO:0030163	0.0341999	1.46598	974	217	28	18117	UBA1,CTSC,PSMA7,PSMB6,HSP90AB1,CTSD,HSP90AA1,PSMA3,PSMA1,HSPA8,HSPA1B,CLTC,HSP90B1,PSMA5,GPC3,APOB,APOE,C4BPA,HSPA5,CLU,AMBP,NOTUM,PCSK9,PSME1,PSMB5,PSMA6,CTSB,PSMB4
GO:BP	response to hormone	GO:0009725	0.0348072	1.45833	921	217	27	18117	AKR1C1,GPI,HSPD1,NME2,IDH1,KRT19,LDHA,GGH,PKM,TFPI,CPN1,APOB,CALR,THBS1,APOA1,AHSG,DAG1,SERPINF1,PCSK9,AGT,GOT1,IGFBP1,FGB,IGF2,SPP1,ICAM1,CTSB
GO:BP	regulation of signaling	GO:0023051	0.0348433	1.45788	3578	217	69	18117	TFRC,GLUD1,CTSC,PSMA7,PSMB6,HSP90AB1,CLSTN1,HSP90AA1,FBLN1,ENO1,PSMA3,C5,PSMA1,PRDX1,HSPA1B,ACTN4,FGA,PSMA5,RBP4,APP,YWHAZ,VTN,P4HB,GPC3,SPTBN1,CDH2,CLSTN3,F10,FGG,APOE,HSPA5,FN1,F2,SERPINF2,CALR,PDIA3,THBS1,C3,LRG1,A2M,RELN,CLU,APOA1,AHSG,DAG1,AMBP,APOC3,NOTUM,VASN,TF,PCSK9,AGT,GOT1,PEBP1,PSME1,PSMB5,PSMA6,IGFBP1,SOD1,MIF,FGB,IGF2,SPP1,ICAM1,HNRNPK,LMNA,PSMB4,GDI2,DKK1
GO:BP	regulation of synapse structure or activity	GO:0050803	0.0356819	1.44755	223	217	12	18117	AGRN,CLSTN1,HSPA8,APP,TUBB,YWHAZ,CDH2,CLSTN3,APOE,RELN,DAG1,CFL1
GO:BP	purine-containing compound metabolic process	GO:0072521	0.0361734	1.44161	473	217	18	18117	FASN,RAN,AHCY,PGAM1,GPI,GAPDH,NME2,PGK1,LDHA,ENO1,ATIC,ALDOA,PKM,TPI1,APP,TTR,PAICS,ACLY
GO:BP	regulation of fibrinolysis	GO:0051917	0.0396512	1.40174	14	217	4	18117	F2,SERPINF2,THBS1,APOH
GO:BP	regulation of cholesterol esterification	GO:0010872	0.0396512	1.40174	14	217	4	18117	APOE,APOA2,APOA1,AGT
GO:BP	canonical Wnt signaling pathway	GO:0060070	0.0406369	1.39108	345	217	15	18117	PSMA7,PSMB6,PSMA3,PSMA1,PSMA5,GPC3,CDH2,APOE,NOTUM,PSME1,PSMB5,PSMA6,IGFBP1,PSMB4,DKK1
GO:BP	protein transport	GO:0015031	0.0422668	1.374	1929	217	44	18117	TFRC,GLUD1,RAN,RPSA,HSPA4,HSP90AB1,HSPD1,CLSTN1,IDH1,HSP90AA1,RPLP2,PDIA4,HSPA8,ACTN4,CLTC,FGA,HSP90B1,RBP4,YWHAE,YWHAZ,SPTBN1,FGG,APOB,APOE,HSPA5,CALR,CLU,TF,AZGP1,AGT,KRT18,SSB,RPLP0,HSPA9,RPL12,ECH1,FGB,KPNB1,NASP,NPM1,NUCB1,CSE1L,LMNA,GDI2
GO:BP	cell junction organization	GO:0034330	0.0428704	1.36784	722	217	23	18117	AGRN,CLSTN1,HSPA8,APP,TUBB,YWHAZ,CDH2,CLSTN3,PTPRK,APOE,FN1,LAMC1,ACTG1,THBS1,C3,SDC4,RELN,DAG1,AGT,CFL1,ACTN1,CADM1,DKK1
GO:BP	cellular component organization or biogenesis	GO:0071840	0.0443594	1.35301	6760	217	111	18117	AGRN,TFRC,RAN,CTSC,SPTAN1,RPSA,HSPA4,XRCC5,GAPDH,HSP90AB1,HSPD1,CLSTN1,NME2,IDH1,HSP90AA1,KRT19,FBLN1,ENO1,HSPA8,TUBA1B,ALDOA,HSPA1B,XRCC6,CLTC,TUBB4B,FGA,HSP90B1,TPM3,NID1,APP,TUBB,YWHAE,YWHAZ,VTN,SET,P4HB,GPC3,SPTBN1,CDH2,GSN,CLSTN3,FLNB,PTPRK,FGG,TTR,APOB,APOE,APOM,HSPA5,APOA2,FN1,F2,SERPINF2,CALR,LAMC1,ACTG1,THBS1,C3,A2M,SERPINA5,SDC4,RELN,CLU,APOA1,MATN3,DAG1,SERPINA1,KRT10,SERPINF1,APOC3,AL…
GO:BP	regulation of transport	GO:0051049	0.0448368	1.34837	1809	217	42	18117	GLUD1,RAN,HSP90AB1,HSPA8,CLIC1,ACTN4,FGA,RBP4,APP,YWHAE,YWHAZ,VTN,GPC3,CDH2,FGG,APOE,APOA2,C4B,F2,CALR,ACTG1,THBS1,C3,SDC4,RELN,CLU,APOA1,C2,AHSG,APOC3,TF,PCSK9,AGT,PLTP,SOD1,DPYSL2,FGB,SPP1,ICAM1,HNRNPK,NUCB1,DKK1
GO:BP	alcohol biosynthetic process	GO:0046165	0.0459122	1.33807	158	217	10	18117	ACAT2,FASN,RAN,APOB,APOE,APOA1,GOT1,SOD1,KPNB1,ACLY
GO:BP	regulation of cellular ketone metabolic process	GO:0010565	0.0497874	1.30288	194	217	11	18117	PSMA7,PSMB6,PSMA3,PSMA1,PSMA5,APOA1,APOC3,PSME1,PSMB5,PSMA6,PSMB4
GO:BP	regulated exocytosis	GO:0045055	1.75123e-33	32.7567	785	217	65	18117	PGAM1,CTSC,SPTAN1,XRCC5,GPI,HSP90AB1,NME2,IDH1,CTSD,HSP90AA1,HSPA8,ALDOA,HSPA1B,XRCC6,ACTN4,GGH,TUBB4B,PKM,FGA,PSMA5,APP,TUBB,EEF2,PSAP,GSN,SERPINA3,FGG,TTR,FN1,SERPINF2,THBS1,PROS1,C3,LRG1,A2M,LGALS3BP,RNASET2,CLU,APOA1,AHSG,SERPINA1,ITIH3,ORM2,ALB,ORM1,APOH,TF,A1BG,F5,HP,CAP1,ACTN1,SOD1,MIF,FGB,CCT8,KPNB1,APLP2,IGF2,FUCA2,CTSB,SERPINA4,GDI2,ACLY,APEH
GO:BP	exocytosis	GO:0006887	9.8069e-31	30.0085	904	217	66	18117	PGAM1,CTSC,SPTAN1,XRCC5,GPI,HSP90AB1,NME2,IDH1,CTSD,HSP90AA1,HSPA8,ALDOA,HSPA1B,XRCC6,ACTN4,GGH,TUBB4B,PKM,FGA,PSMA5,APP,TUBB,EEF2,PSAP,GSN,SERPINA3,FGG,TTR,FN1,SERPINF2,THBS1,PROS1,C3,LRG1,A2M,LGALS3BP,SDC4,RNASET2,CLU,APOA1,AHSG,SERPINA1,ITIH3,ORM2,ALB,ORM1,APOH,TF,A1BG,F5,HP,CAP1,ACTN1,SOD1,MIF,FGB,CCT8,KPNB1,APLP2,IGF2,FUCA2,CTSB,SERPINA4,GDI2,ACLY,APEH
GO:BP	post-translational protein modification	GO:0043687	1.28637e-30	29.8906	362	217	46	18117	PSMA7,PSMB6,PSMA3,PSMA1,FGA,HSP90B1,PSMA5,APP,P4HB,GPC3,CDH2,FGG,APOB,APOE,SERPIND1,APOA2,FN1,PROC,LAMC1,ITIH2,C3,APOA1,AHSG,MATN3,SERPINA1,AFP,NOTUM,SERPINC1,ALB,TF,PCSK9,F5,BPIFB2,CP,PSME1,PSMB5,PSMA6,IGFBP1,LAMB1,APLP2,PRKCSH,SPP1,FUCA2,NUCB1,PSMB4,VCAN
GO:BP	platelet degranulation	GO:0002576	6.7992e-29	28.1675	126	217	31	18117	ALDOA,ACTN4,FGA,APP,PSAP,SERPINA3,FGG,FN1,SERPINF2,THBS1,PROS1,A2M,LGALS3BP,CLU,APOA1,AHSG,SERPINA1,ITIH3,ORM2,ALB,ORM1,APOH,TF,A1BG,F5,ACTN1,SOD1,FGB,APLP2,IGF2,SERPINA4
GO:BP	vesicle-mediated transport	GO:0016192	3.77967e-27	26.4225	2180	217	93	18117	TFRC,PGAM1,CTSC,SPTAN1,XRCC5,GPI,HSP90AB1,CLSTN1,NME2,IDH1,CTSD,HSP90AA1,HSPA8,ALDOA,HSPA1B,XRCC6,ACTN4,GGH,CLTC,TUBB4B,PKM,FGA,HSP90B1,PSMA5,APP,TUBB,EEF2,PSAP,VTN,GPC3,SPTBN1,CDH2,GSN,F10,SERPINA3,FGG,TTR,APOB,APOE,C4BPA,CFI,APOA2,C4B,FN1,PROC,F2,SERPINF2,CALR,ACTG1,THBS1,PROS1,C3,LRG1,A2M,LGALS3BP,SDC4,RNASET2,CLU,APOA1,C2,AHSG,SERPINA1,AMBP,ITIH3,APOC3,ORM2,ALB,ORM1,APOH,TF,PCSK9,A1BG,F5,HP,K…
GO:BP	secretion by cell	GO:0032940	7.96787e-26	25.0987	1364	217	73	18117	GLUD1,PGAM1,CTSC,SPTAN1,XRCC5,GPI,HSP90AB1,NME2,IDH1,CTSD,HSP90AA1,PDIA4,HSPA8,ALDOA,HSPA1B,XRCC6,ACTN4,GGH,TUBB4B,PKM,FGA,PSMA5,RBP4,APP,TUBB,EEF2,PSAP,GSN,SERPINA3,FGG,TTR,APOE,FN1,SERPINF2,THBS1,PROS1,C3,LRG1,A2M,LGALS3BP,SDC4,RNASET2,CLU,APOA1,AHSG,SERPINA1,ITIH3,ORM2,ALB,ORM1,APOH,TF,AGT,A1BG,F5,HP,CAP1,ACTN1,SOD1,MIF,DPYSL2,FGB,CCT8,KPNB1,APLP2,IGF2,SPP1,FUCA2,CTSB,SERPINA4,GDI2,ACLY,APEH
GO:BP	export from cell	GO:0140352	1.45611e-25	24.8368	1418	217	74	18117	GLUD1,PGAM1,CTSC,SPTAN1,XRCC5,GPI,HSP90AB1,NME2,IDH1,CTSD,HSP90AA1,PDIA4,HSPA8,ALDOA,HSPA1B,XRCC6,ACTN4,GGH,TUBB4B,PKM,FGA,PSMA5,RBP4,APP,TUBB,YWHAE,EEF2,PSAP,GSN,SERPINA3,FGG,TTR,APOE,FN1,SERPINF2,THBS1,PROS1,C3,LRG1,A2M,LGALS3BP,SDC4,RNASET2,CLU,APOA1,AHSG,SERPINA1,ITIH3,ORM2,ALB,ORM1,APOH,TF,AGT,A1BG,F5,HP,CAP1,ACTN1,SOD1,MIF,DPYSL2,FGB,CCT8,KPNB1,APLP2,IGF2,SPP1,FUCA2,CTSB,SERPINA4,GDI2,ACLY,…
GO:BP	secretion	GO:0046903	5.41015e-24	23.2668	1501	217	74	18117	GLUD1,PGAM1,CTSC,SPTAN1,XRCC5,GPI,HSP90AB1,NME2,IDH1,CTSD,HSP90AA1,PDIA4,HSPA8,ALDOA,HSPA1B,XRCC6,ACTN4,GGH,TUBB4B,PKM,FGA,PSMA5,RBP4,APP,TUBB,EEF2,PSAP,GSN,SERPINA3,FGG,TTR,APOE,FN1,SERPINF2,THBS1,PROS1,C3,LRG1,A2M,LGALS3BP,SDC4,RNASET2,CLU,APOA1,AHSG,SERPINA1,ITIH3,ORM2,SERPINC1,ALB,ORM1,APOH,TF,AGT,A1BG,F5,HP,CAP1,ACTN1,SOD1,MIF,DPYSL2,FGB,CCT8,KPNB1,APLP2,IGF2,SPP1,FUCA2,CTSB,SERPINA4,GDI2,AC…
GO:BP	transport	GO:0006810	6.44076e-24	23.1911	5224	217	139	18117	TFRC,GLUD1,RAN,PGAM1,CTSC,SPTAN1,RPSA,AKR1C1,HSPA4,XRCC5,GPI,PSMA7,PSMB6,HSP90AB1,HSPD1,CLSTN1,NME2,IDH1,CTSD,HSP90AA1,RPLP2,PDIA4,PSMA3,PSMA1,HSPA8,TUBA1B,CLIC1,ALDOA,HSPA1B,XRCC6,ACTN4,GGH,CLTC,TUBB4B,PKM,FGA,HSP90B1,PSMA5,RBP4,APP,TUBB,YWHAE,EEF2,YWHAZ,PSAP,VTN,GPC3,SERPINA7,SPTBN1,CDH2,GSN,F10,SERPINA3,FGG,TTR,APOB,APOE,APOM,C4BPA,CFI,APOC4-APOC2,HSPA5,APOA2,C4B,FN1,PROC,F2,SERPINF2,CALR,ACTG…
GO:BP	establishment of localization	GO:0051234	3.0899e-23	22.5101	5372	217	140	18117	TFRC,GLUD1,RAN,PGAM1,CTSC,SPTAN1,RPSA,AKR1C1,HSPA4,XRCC5,GPI,PSMA7,PSMB6,HSP90AB1,HSPD1,CLSTN1,NME2,IDH1,CTSD,HSP90AA1,RPLP2,PDIA4,PSMA3,PSMA1,HSPA8,TUBA1B,CLIC1,ALDOA,HSPA1B,XRCC6,ACTN4,GGH,CLTC,TUBB4B,PKM,FGA,HSP90B1,PSMA5,RBP4,APP,TUBB,YWHAE,EEF2,YWHAZ,PSAP,VTN,GPC3,SERPINA7,SPTBN1,CDH2,GSN,F10,SERPINA3,FGG,TTR,APOB,APOE,APOM,C4BPA,CFI,APOC4-APOC2,HSPA5,APOA2,C4B,FN1,PROC,F2,SERPINF2,CALR,ACTG…
GO:BP	organonitrogen compound metabolic process	GO:1901564	2.30356e-22	21.6376	6792	217	157	18117	AGRN,TFRC,GLUD1,FASN,RAN,UBA1,AHCY,PGAM1,CTSC,RPSA,XRCC5,GPI,GAPDH,PSMA7,PSMB6,QPRT,HSP90AB1,HSPD1,EEF1G,NME2,IDH1,CTSD,HSP90AA1,PGK1,LDHA,FBLN1,HSPE1,RPLP2,GSR,PDIA4,ENO1,ATIC,PSMA3,PSAT1,C5,PSMA1,HSPA8,CLIC1,ALDOA,HSPA1B,XRCC6,GGH,CLTC,PKM,FGA,HSP90B1,PSMA5,TPI1,APP,YWHAE,BTD,TFPI,EEF2,YWHAZ,PSAP,VTN,CPN1,SET,P4HB,GPC3,SERPINA7,SPTBN1,CDH2,GSN,PTPRK,F10,SERPINA3,FGG,TTR,PAICS,APOB,APOE,APOM,C4B…
GO:BP	neutrophil mediated immunity	GO:0002446	1.80068e-21	20.7446	497	217	43	18117	PGAM1,CTSC,SPTAN1,XRCC5,GPI,HSP90AB1,NME2,IDH1,CTSD,HSP90AA1,HSPA8,ALDOA,HSPA1B,XRCC6,GGH,TUBB4B,PKM,PSMA5,TUBB,EEF2,PSAP,GSN,SERPINA3,TTR,F2,C3,LRG1,RNASET2,AHSG,SERPINA1,ORM2,ORM1,A1BG,HP,CAP1,MIF,CCT8,KPNB1,FUCA2,CTSB,GDI2,ACLY,APEH
GO:BP	establishment of localization in cell	GO:0051649	2.22752e-21	20.6522	2813	217	97	18117	RAN,PGAM1,CTSC,SPTAN1,RPSA,HSPA4,XRCC5,GPI,HSP90AB1,HSPD1,NME2,IDH1,CTSD,HSP90AA1,RPLP2,HSPA8,TUBA1B,ALDOA,HSPA1B,XRCC6,ACTN4,GGH,CLTC,TUBB4B,PKM,FGA,HSP90B1,PSMA5,APP,TUBB,YWHAE,EEF2,YWHAZ,PSAP,SPTBN1,CDH2,GSN,F10,SERPINA3,FGG,TTR,APOE,HSPA5,FN1,PROC,F2,SERPINF2,CALR,ACTG1,THBS1,PROS1,C3,LRG1,A2M,LGALS3BP,RNASET2,CLU,APOA1,AHSG,SERPINA1,ITIH3,ORM2,ALB,ORM1,APOH,TF,PCSK9,AGT,A1BG,F5,HP,CFL1,CAP1,…
GO:BP	immune effector process	GO:0002252	2.48517e-21	20.6046	1309	217	66	18117	TFRC,PGAM1,CTSC,SPTAN1,XRCC5,GPI,HSP90AB1,HSPD1,NME2,IDH1,CTSD,HSP90AA1,C5,HSPA8,PRDX1,ALDOA,HSPA1B,XRCC6,GGH,TUBB4B,PKM,PSMA5,RBP4,APP,TUBB,EEF2,PSAP,VTN,CPN1,GSN,SERPINA3,TTR,C4BPA,CFI,APOA2,C4B,F2,ACTG1,PROS1,C3,LRG1,A2M,RNASET2,CLU,APOA1,C2,AHSG,SERPINA1,CPN2,ORM2,ORM1,A1BG,HP,CAP1,ILF3,CADM1,MIF,CCT8,KPNB1,FUCA2,ICAM1,CTSB,PGC,GDI2,ACLY,APEH
GO:BP	neutrophil degranulation	GO:0043312	5.13516e-21	20.2894	482	217	42	18117	PGAM1,CTSC,SPTAN1,XRCC5,GPI,HSP90AB1,NME2,IDH1,CTSD,HSP90AA1,HSPA8,ALDOA,HSPA1B,XRCC6,GGH,TUBB4B,PKM,PSMA5,TUBB,EEF2,PSAP,GSN,SERPINA3,TTR,C3,LRG1,RNASET2,AHSG,SERPINA1,ORM2,ORM1,A1BG,HP,CAP1,MIF,CCT8,KPNB1,FUCA2,CTSB,GDI2,ACLY,APEH
GO:BP	neutrophil activation involved in immune response	GO:0002283	6.54899e-21	20.1838	485	217	42	18117	PGAM1,CTSC,SPTAN1,XRCC5,GPI,HSP90AB1,NME2,IDH1,CTSD,HSP90AA1,HSPA8,ALDOA,HSPA1B,XRCC6,GGH,TUBB4B,PKM,PSMA5,TUBB,EEF2,PSAP,GSN,SERPINA3,TTR,C3,LRG1,RNASET2,AHSG,SERPINA1,ORM2,ORM1,A1BG,HP,CAP1,MIF,CCT8,KPNB1,FUCA2,CTSB,GDI2,ACLY,APEH
GO:BP	proteolysis	GO:0006508	1.06711e-20	19.9718	1836	217	77	18117	UBA1,CTSC,GPI,GAPDH,PSMA7,PSMB6,HSP90AB1,HSPD1,CTSD,PGK1,FBLN1,HSPE1,ENO1,PSMA3,C5,PSMA1,HSPA1B,GGH,FGA,HSP90B1,PSMA5,APP,YWHAE,TFPI,VTN,CPN1,GPC3,SERPINA7,GSN,F10,SERPINA3,FGG,APOE,CFI,SERPIND1,HSPA5,C4B,FN1,PROC,F2,SERPINF2,PDIA3,ITIH2,THBS1,PROS1,CPE,C3,A2M,SERPINA5,RELN,CLU,C2,SERPINA6,AHSG,DAG1,SERPINA1,AMBP,SERPINF1,ITIH3,SERPINC1,APOH,PCSK9,AGT,HP,PEBP1,PRDX3,PSME1,PSMB5,PSMA6,FGB,SERPINA1…
GO:BP	leukocyte mediated immunity	GO:0002443	1.13669e-20	19.9444	877	217	54	18117	TFRC,PGAM1,CTSC,SPTAN1,XRCC5,GPI,HSP90AB1,HSPD1,NME2,IDH1,CTSD,HSP90AA1,C5,HSPA8,PRDX1,ALDOA,HSPA1B,XRCC6,GGH,TUBB4B,PKM,PSMA5,TUBB,EEF2,PSAP,GSN,SERPINA3,TTR,C4BPA,CFI,C4B,F2,C3,LRG1,RNASET2,CLU,C2,AHSG,SERPINA1,ORM2,ORM1,A1BG,HP,CAP1,CADM1,MIF,CCT8,KPNB1,FUCA2,ICAM1,CTSB,GDI2,ACLY,APEH
GO:BP	neutrophil activation	GO:0042119	1.84142e-20	19.7348	498	217	42	18117	PGAM1,CTSC,SPTAN1,XRCC5,GPI,HSP90AB1,NME2,IDH1,CTSD,HSP90AA1,HSPA8,ALDOA,HSPA1B,XRCC6,GGH,TUBB4B,PKM,PSMA5,TUBB,EEF2,PSAP,GSN,SERPINA3,TTR,C3,LRG1,RNASET2,AHSG,SERPINA1,ORM2,ORM1,A1BG,HP,CAP1,MIF,CCT8,KPNB1,FUCA2,CTSB,GDI2,ACLY,APEH
GO:BP	cellular localization	GO:0051641	2.08736e-20	19.6804	3541	217	108	18117	AGRN,TFRC,RAN,PGAM1,CTSC,SPTAN1,RPSA,HSPA4,XRCC5,GPI,HSP90AB1,HSPD1,CLSTN1,NME2,IDH1,CTSD,HSP90AA1,RPLP2,HSPA8,TUBA1B,ALDOA,HSPA1B,XRCC6,ACTN4,GGH,CLTC,TUBB4B,PKM,FGA,HSP90B1,PSMA5,APP,TUBB,YWHAE,EEF2,YWHAZ,PSAP,GPC3,SPTBN1,CDH2,GSN,PTPRK,F10,SERPINA3,FGG,TTR,APOE,HSPA5,FN1,PROC,F2,SERPINF2,CALR,ACTG1,THBS1,PROS1,CPE,C3,LRG1,A2M,LGALS3BP,RNASET2,RELN,CLU,APOA1,AHSG,DAG1,SERPINA1,ITIH3,ORM2,ALB,OR…
GO:BP	granulocyte activation	GO:0036230	2.93593e-20	19.5323	504	217	42	18117	PGAM1,CTSC,SPTAN1,XRCC5,GPI,HSP90AB1,NME2,IDH1,CTSD,HSP90AA1,HSPA8,ALDOA,HSPA1B,XRCC6,GGH,TUBB4B,PKM,PSMA5,TUBB,EEF2,PSAP,GSN,SERPINA3,TTR,C3,LRG1,RNASET2,AHSG,SERPINA1,ORM2,ORM1,A1BG,HP,CAP1,MIF,CCT8,KPNB1,FUCA2,CTSB,GDI2,ACLY,APEH
GO:BP	myeloid leukocyte activation	GO:0002274	6.01013e-20	19.2211	667	217	47	18117	PGAM1,CTSC,SPTAN1,XRCC5,GPI,HSP90AB1,HSPD1,NME2,IDH1,CTSD,HSP90AA1,HSPA8,ALDOA,HSPA1B,XRCC6,GGH,TUBB4B,PKM,PSMA5,APP,TUBB,EEF2,PSAP,GSN,SERPINA3,TTR,THBS1,C3,LRG1,RNASET2,CLU,AHSG,SERPINA1,ORM2,ORM1,A1BG,HP,CAP1,MIF,DHRS2,CCT8,KPNB1,FUCA2,CTSB,GDI2,ACLY,APEH
GO:BP	myeloid leukocyte mediated immunity	GO:0002444	1.0875e-19	18.9636	551	217	43	18117	PGAM1,CTSC,SPTAN1,XRCC5,GPI,HSP90AB1,NME2,IDH1,CTSD,HSP90AA1,HSPA8,ALDOA,HSPA1B,XRCC6,GGH,TUBB4B,PKM,PSMA5,TUBB,EEF2,PSAP,GSN,SERPINA3,TTR,F2,C3,LRG1,RNASET2,AHSG,SERPINA1,ORM2,ORM1,A1BG,HP,CAP1,MIF,CCT8,KPNB1,FUCA2,CTSB,GDI2,ACLY,APEH
GO:BP	regulation of peptidase activity	GO:0052547	1.38446e-19	18.8587	467	217	40	18117	GPI,GAPDH,HSPD1,CTSD,FBLN1,HSPE1,PSMA3,C5,APP,YWHAE,TFPI,VTN,GPC3,SERPINA7,GSN,SERPINA3,SERPIND1,C4B,FN1,SERPINF2,ITIH2,THBS1,PROS1,C3,A2M,SERPINA5,SERPINA6,AHSG,SERPINA1,AMBP,SERPINF1,ITIH3,SERPINC1,AGT,PEBP1,PRDX3,PSME1,SERPINA11,APLP2,SERPINA4
GO:BP	negative regulation of peptidase activity	GO:0010466	1.5049e-19	18.8225	267	217	32	18117	GPI,GAPDH,C5,APP,YWHAE,TFPI,VTN,GPC3,SERPINA7,SERPINA3,SERPIND1,C4B,SERPINF2,ITIH2,THBS1,PROS1,C3,A2M,SERPINA5,SERPINA6,AHSG,SERPINA1,AMBP,SERPINF1,ITIH3,SERPINC1,AGT,PEBP1,PRDX3,SERPINA11,APLP2,SERPINA4
GO:BP	immune system process	GO:0002376	2.11551e-19	18.6746	3278	217	102	18117	TFRC,FASN,AHCY,PGAM1,CTSC,SPTAN1,XRCC5,GPI,GAPDH,PSMA7,PSMB6,HSP90AB1,HSPD1,NME2,IDH1,CTSD,HSP90AA1,PSMA3,C5,PSMA1,HSPA8,PRDX1,ALDOA,HSPA1B,XRCC6,GGH,CLTC,TUBB4B,PKM,FGA,PSMA5,RBP4,APP,TUBB,EEF2,PSAP,VTN,CPN1,GPC3,GSN,PTPRK,SERPINA3,TTR,APOB,APOE,C4BPA,CFI,APOA2,C4B,FN1,F2,CALR,ACTG1,PDIA3,THBS1,PROS1,C3,LRG1,A2M,SDC4,RNASET2,CLU,APOA1,C2,AHSG,SERPINA1,CPN2,AMBP,ORM2,SERPINC1,ORM1,TF,AZGP1,A1BG,H…
GO:BP	leukocyte degranulation	GO:0043299	2.95805e-19	18.529	535	217	42	18117	PGAM1,CTSC,SPTAN1,XRCC5,GPI,HSP90AB1,NME2,IDH1,CTSD,HSP90AA1,HSPA8,ALDOA,HSPA1B,XRCC6,GGH,TUBB4B,PKM,PSMA5,TUBB,EEF2,PSAP,GSN,SERPINA3,TTR,C3,LRG1,RNASET2,AHSG,SERPINA1,ORM2,ORM1,A1BG,HP,CAP1,MIF,CCT8,KPNB1,FUCA2,CTSB,GDI2,ACLY,APEH
GO:BP	negative regulation of endopeptidase activity	GO:0010951	3.79932e-19	18.4203	253	217	31	18117	GPI,GAPDH,C5,APP,YWHAE,TFPI,VTN,SERPINA7,SERPINA3,SERPIND1,C4B,SERPINF2,ITIH2,THBS1,PROS1,C3,A2M,SERPINA5,SERPINA6,AHSG,SERPINA1,AMBP,SERPINF1,ITIH3,SERPINC1,AGT,PEBP1,PRDX3,SERPINA11,APLP2,SERPINA4
GO:BP	localization	GO:0051179	4.79232e-19	18.3195	6901	217	153	18117	AGRN,TFRC,GLUD1,RAN,PGAM1,CTSC,SPTAN1,RPSA,AKR1C1,HSPA4,XRCC5,GPI,ATRN,PSMA7,PSMB6,HSP90AB1,HSPD1,CLSTN1,NME2,IDH1,CTSD,HSP90AA1,FBLN1,RPLP2,PDIA4,PSMA3,C5,PSMA1,HSPA8,TUBA1B,CLIC1,ALDOA,HSPA1B,XRCC6,ACTN4,GGH,CLTC,TUBB4B,PKM,FGA,HSP90B1,PSMA5,RBP4,APP,TUBB,YWHAE,EEF2,YWHAZ,PSAP,VTN,GPC3,SERPINA7,SPTBN1,CDH2,GSN,CLSTN3,PTPRK,F10,SERPINA3,FGG,TTR,APOB,APOE,APOM,C4BPA,CFI,APOC4-APOC2,HSPA5,APOA2,C4…
GO:BP	immune response	GO:0006955	5.58689e-19	18.2528	2311	217	84	18117	TFRC,AHCY,PGAM1,CTSC,SPTAN1,XRCC5,GPI,GAPDH,PSMA7,PSMB6,HSP90AB1,HSPD1,NME2,IDH1,CTSD,HSP90AA1,PSMA3,C5,PSMA1,HSPA8,PRDX1,ALDOA,HSPA1B,XRCC6,GGH,TUBB4B,PKM,FGA,PSMA5,APP,TUBB,EEF2,PSAP,VTN,CPN1,GSN,SERPINA3,TTR,APOE,C4BPA,CFI,APOA2,C4B,F2,ACTG1,THBS1,PROS1,C3,LRG1,A2M,RNASET2,CLU,APOA1,C2,AHSG,SERPINA1,CPN2,AMBP,ORM2,SERPINC1,ORM1,TF,A1BG,HP,BPIFB2,PSME1,PSMB5,PSMA6,CAP1,FGL1,CADM1,MIF,FGB,CCT8,K…
GO:BP	myeloid cell activation involved in immune response	GO:0002275	6.93487e-19	18.159	547	217	42	18117	PGAM1,CTSC,SPTAN1,XRCC5,GPI,HSP90AB1,NME2,IDH1,CTSD,HSP90AA1,HSPA8,ALDOA,HSPA1B,XRCC6,GGH,TUBB4B,PKM,PSMA5,TUBB,EEF2,PSAP,GSN,SERPINA3,TTR,C3,LRG1,RNASET2,AHSG,SERPINA1,ORM2,ORM1,A1BG,HP,CAP1,MIF,CCT8,KPNB1,FUCA2,CTSB,GDI2,ACLY,APEH
GO:BP	response to stress	GO:0006950	5.01144e-18	17.3	4170	217	114	18117	UBA1,AHCY,CTSC,HSPA4,XRCC5,GPI,ATRN,GAPDH,PSMA7,PSMB6,HSP90AB1,HSPD1,NME2,IDH1,HSP90AA1,PGK1,LDHA,FBLN1,HSPE1,GSR,PDIA4,ENO1,PSMA3,C5,PSMA1,HSPA8,CLIC1,PRDX1,HSPA1B,XRCC6,ACTN4,TUBB4B,PKM,FGA,HSP90B1,PSMA5,APP,TUBB,YWHAE,TFPI,EEF2,YWHAZ,VTN,P4HB,GSN,PTPRK,F10,SERPINA3,FGG,APOE,C4BPA,CFI,SERPIND1,HSPA5,C4B,FN1,PROC,F2,SERPINF2,CALR,ACTG1,PDIA3,THBS1,PROS1,C3,A2M,SERPINA5,LGALS3BP,SDC4,RNASET2,RELN…
GO:BP	protein metabolic process	GO:0019538	7.75422e-18	17.1105	5808	217	137	18117	TFRC,UBA1,CTSC,RPSA,XRCC5,GPI,GAPDH,PSMA7,PSMB6,HSP90AB1,HSPD1,EEF1G,NME2,CTSD,HSP90AA1,PGK1,FBLN1,HSPE1,RPLP2,PDIA4,ENO1,PSMA3,C5,PSMA1,HSPA8,HSPA1B,XRCC6,GGH,CLTC,PKM,FGA,HSP90B1,PSMA5,APP,YWHAE,TFPI,EEF2,YWHAZ,VTN,CPN1,SET,P4HB,GPC3,SERPINA7,SPTBN1,CDH2,GSN,PTPRK,F10,SERPINA3,FGG,TTR,APOB,APOE,APOM,C4BPA,CFI,SERPIND1,HSPA5,APOA2,C4B,FN1,PROC,F2,SERPINF2,CALR,LAMC1,PDIA3,ITIH2,THBS1,PROS1,CPE,C…
GO:BP	regulation of proteolysis	GO:0030162	9.0614e-18	17.0428	752	217	47	18117	CTSC,GPI,GAPDH,HSP90AB1,HSPD1,CTSD,FBLN1,HSPE1,ENO1,PSMA3,C5,HSPA1B,APP,YWHAE,TFPI,VTN,GPC3,SERPINA7,GSN,SERPINA3,APOE,SERPIND1,C4B,FN1,F2,SERPINF2,ITIH2,THBS1,PROS1,C3,A2M,SERPINA5,CLU,SERPINA6,AHSG,SERPINA1,AMBP,SERPINF1,ITIH3,SERPINC1,AGT,PEBP1,PRDX3,PSME1,SERPINA11,APLP2,SERPINA4
GO:BP	regulation of endopeptidase activity	GO:0052548	1.01904e-17	16.9918	437	217	37	18117	GPI,GAPDH,HSPD1,CTSD,HSPE1,PSMA3,C5,APP,YWHAE,TFPI,VTN,SERPINA7,GSN,SERPINA3,SERPIND1,C4B,SERPINF2,ITIH2,THBS1,PROS1,C3,A2M,SERPINA5,SERPINA6,AHSG,SERPINA1,AMBP,SERPINF1,ITIH3,SERPINC1,AGT,PEBP1,PRDX3,PSME1,SERPINA11,APLP2,SERPINA4
GO:BP	cell activation involved in immune response	GO:0002263	1.11396e-17	16.9531	721	217	46	18117	TFRC,PGAM1,CTSC,SPTAN1,XRCC5,GPI,HSP90AB1,HSPD1,NME2,IDH1,CTSD,HSP90AA1,HSPA8,ALDOA,HSPA1B,XRCC6,GGH,TUBB4B,PKM,PSMA5,APP,TUBB,EEF2,PSAP,GSN,SERPINA3,TTR,C3,LRG1,RNASET2,AHSG,SERPINA1,ORM2,ORM1,A1BG,HP,CAP1,MIF,CCT8,KPNB1,FUCA2,ICAM1,CTSB,GDI2,ACLY,APEH
GO:BP	negative regulation of proteolysis	GO:0045861	1.3409e-17	16.8726	359	217	34	18117	GPI,GAPDH,HSP90AB1,C5,APP,YWHAE,TFPI,VTN,GPC3,SERPINA7,SERPINA3,SERPIND1,C4B,F2,SERPINF2,ITIH2,THBS1,PROS1,C3,A2M,SERPINA5,SERPINA6,AHSG,SERPINA1,AMBP,SERPINF1,ITIH3,SERPINC1,AGT,PEBP1,PRDX3,SERPINA11,APLP2,SERPINA4
GO:BP	leukocyte activation involved in immune response	GO:0002366	6.12368e-17	16.213	717	217	45	18117	TFRC,PGAM1,CTSC,SPTAN1,XRCC5,GPI,HSP90AB1,HSPD1,NME2,IDH1,CTSD,HSP90AA1,HSPA8,ALDOA,HSPA1B,XRCC6,GGH,TUBB4B,PKM,PSMA5,TUBB,EEF2,PSAP,GSN,SERPINA3,TTR,C3,LRG1,RNASET2,AHSG,SERPINA1,ORM2,ORM1,A1BG,HP,CAP1,MIF,CCT8,KPNB1,FUCA2,ICAM1,CTSB,GDI2,ACLY,APEH
GO:BP	cell activation	GO:0001775	9.32287e-17	16.0305	1495	217	64	18117	TFRC,PGAM1,CTSC,SPTAN1,XRCC5,GPI,HSP90AB1,HSPD1,NME2,IDH1,CTSD,HSP90AA1,HSPA8,CLIC1,PRDX1,ALDOA,HSPA1B,XRCC6,GGH,TUBB4B,PKM,FGA,PSMA5,APP,TUBB,EEF2,YWHAZ,PSAP,GSN,PTPRK,SERPINA3,FGG,TTR,APOE,FN1,F2,ACTG1,THBS1,C3,LRG1,SDC4,RNASET2,CLU,AHSG,SERPINA1,ORM2,ORM1,A1BG,HP,CAP1,FGL1,SOD1,MIF,DHRS2,FGB,CCT8,KPNB1,IGF2,FUCA2,ICAM1,CTSB,GDI2,ACLY,APEH
GO:BP	negative regulation of hydrolase activity	GO:0051346	1.00471e-15	14.998	470	217	36	18117	GPI,GAPDH,C5,APP,YWHAE,TFPI,VTN,SET,GPC3,SERPINA7,SERPINA3,SERPIND1,APOA2,C4B,SERPINF2,ITIH2,THBS1,PROS1,C3,A2M,SERPINA5,APOA1,SERPINA6,AHSG,SERPINA1,AMBP,SERPINF1,ITIH3,APOC3,SERPINC1,AGT,PEBP1,PRDX3,SERPINA11,APLP2,SERPINA4
GO:BP	regulation of biological quality	GO:0065008	1.50386e-15	14.8228	4131	217	109	18117	AGRN,TFRC,GLUD1,SPTAN1,ALDH1A1,AKR1C1,XRCC5,GPI,GAPDH,PSMA7,PSMB6,HSP90AB1,HSPD1,CLSTN1,NME2,HSP90AA1,FBLN1,GSR,PDIA4,PSMA3,PSMA1,HSPA8,CLIC1,PRDX1,ALDOA,HSPA1B,XRCC6,FGA,HSP90B1,PSMA5,RBP4,APP,TUBB,YWHAE,TFPI,YWHAZ,VTN,SET,P4HB,SERPINA7,SPTBN1,CDH2,GSN,CLSTN3,F10,SERPINA3,FGG,TTR,APOB,APOE,APOM,SERPIND1,HSPA5,APOA2,FN1,PROC,F2,SERPINF2,CALR,LAMC1,ACTG1,PDIA3,THBS1,PROS1,C3,A2M,SERPINA5,RELN,CLU,…
GO:BP	response to stimulus	GO:0050896	6.79401e-15	14.1679	9407	217	174	18117	AGRN,TFRC,FASN,UBA1,AHCY,PGAM1,CTSC,SPTAN1,AKR1C1,HSPA4,XRCC5,GPI,ATRN,GAPDH,PSMA7,PSMB6,HSP90AB1,HSPD1,EEF1G,NME2,IDH1,CTSD,HSP90AA1,KRT19,PGK1,LDHA,FBLN1,HSPE1,TALDO1,GSR,PDIA4,ENO1,ATIC,PSMA3,C5,PSMA1,HSPA8,TUBA1B,CLIC1,PRDX1,ALDOA,HSPA1B,XRCC6,ACTN4,GGH,CLTC,TUBB4B,PKM,FGA,HSP90B1,PSMA5,RBP4,APP,TUBB,YWHAE,TFPI,EEF2,YWHAZ,PSAP,VTN,CPN1,P4HB,GPC3,SPTBN1,CDH2,GSN,FLNB,PTPRK,F10,SERPINA3,FGG,TTR…
GO:BP	biological process involved in interspecies interaction between organisms	GO:0044419	4.56397e-14	13.3407	2255	217	75	18117	TFRC,RAN,RPSA,XRCC5,GAPDH,PSMA7,PSMB6,HSP90AB1,HSPD1,EEF1G,HSP90AA1,KRT19,FBLN1,RPLP2,ENO1,PSMA3,C5,PSMA1,HSPA8,PRDX1,HSPA1B,XRCC6,TUBB4B,FGA,PSMA5,APP,TUBB,YWHAE,TFPI,SET,P4HB,GPC3,GSN,APOB,APOE,C4BPA,CFI,APOA2,C4B,FN1,F2,ACTG1,C3,LRG1,A2M,RNASET2,CLU,C2,DAG1,AMBP,TF,HP,BPIFB2,PRDX3,CFL1,KRT8,PSME1,PSMB5,PSMA6,KRT18,SSB,ILF3,RPLP0,CADM1,RPL12,MIF,FGB,KPNB1,NPM1,FUCA2,ICAM1,CTSB,PGC,HNRNPK,PSMB4
GO:BP	cellular protein metabolic process	GO:0044267	5.36822e-14	13.2702	5229	217	122	18117	TFRC,UBA1,CTSC,RPSA,XRCC5,GPI,GAPDH,PSMA7,PSMB6,HSP90AB1,HSPD1,EEF1G,NME2,CTSD,HSP90AA1,FBLN1,HSPE1,RPLP2,PDIA4,ENO1,PSMA3,C5,PSMA1,HSPA1B,XRCC6,CLTC,PKM,FGA,HSP90B1,PSMA5,APP,YWHAE,TFPI,EEF2,YWHAZ,VTN,SET,P4HB,GPC3,SERPINA7,SPTBN1,CDH2,GSN,PTPRK,SERPINA3,FGG,TTR,APOB,APOE,SERPIND1,HSPA5,APOA2,C4B,FN1,PROC,F2,SERPINF2,CALR,LAMC1,PDIA3,ITIH2,THBS1,PROS1,CPE,C3,A2M,SERPINA5,SDC4,RELN,CLU,APOA1,SERP…
GO:BP	response to external stimulus	GO:0009605	6.02565e-14	13.22	2944	217	87	18117	AHCY,CTSC,SPTAN1,XRCC5,GPI,GAPDH,PSMA7,PSMB6,HSP90AB1,HSPD1,EEF1G,HSP90AA1,LDHA,ENO1,PSMA3,C5,PSMA1,HSPA8,PRDX1,XRCC6,TUBB4B,PKM,FGA,PSMA5,APP,TUBB,TFPI,EEF2,VTN,GPC3,SPTBN1,CDH2,GSN,FGG,APOB,APOE,C4BPA,CFI,SERPIND1,HSPA5,C4B,PROC,F2,SERPINF2,CALR,ACTG1,THBS1,PROS1,C3,LRG1,A2M,RNASET2,RELN,CLU,APOA1,C2,AHSG,DAG1,SERPINF1,SERPINC1,ALB,APOH,TF,PCSK9,AGT,HP,BPIFB2,GOT1,PRDX3,CFL1,KRT8,PSME1,PSMB5,PS…
GO:BP	leukocyte activation	GO:0045321	4.02066e-13	12.3957	1332	217	55	18117	TFRC,PGAM1,CTSC,SPTAN1,XRCC5,GPI,HSP90AB1,HSPD1,NME2,IDH1,CTSD,HSP90AA1,HSPA8,PRDX1,ALDOA,HSPA1B,XRCC6,GGH,TUBB4B,PKM,PSMA5,APP,TUBB,EEF2,PSAP,GSN,PTPRK,SERPINA3,TTR,THBS1,C3,LRG1,SDC4,RNASET2,CLU,AHSG,SERPINA1,ORM2,ORM1,A1BG,HP,CAP1,FGL1,SOD1,MIF,DHRS2,CCT8,KPNB1,IGF2,FUCA2,ICAM1,CTSB,GDI2,ACLY,APEH
GO:BP	response to chemical	GO:0042221	3.6442e-12	11.4384	4781	217	112	18117	AGRN,TFRC,FASN,AHCY,CTSC,SPTAN1,AKR1C1,HSPA4,XRCC5,GPI,GAPDH,PSMA7,PSMB6,HSP90AB1,HSPD1,NME2,IDH1,HSP90AA1,KRT19,PGK1,LDHA,HSPE1,TALDO1,GSR,ENO1,ATIC,PSMA3,C5,PSMA1,HSPA8,TUBA1B,PRDX1,HSPA1B,XRCC6,ACTN4,GGH,PKM,FGA,HSP90B1,PSMA5,RBP4,APP,TFPI,EEF2,YWHAZ,VTN,CPN1,P4HB,GPC3,SPTBN1,GSN,PTPRK,FGG,APOB,APOE,APOM,SERPIND1,HSPA5,APOA2,C4B,FN1,SERPINF2,CALR,ACTG1,PDIA3,THBS1,LRG1,RELN,CLU,APOA1,C2,AHSG,D…
GO:BP	regulation of hydrolase activity	GO:0051336	5.43625e-12	11.2647	1321	217	53	18117	AGRN,ALDH1A1,GPI,GAPDH,HSP90AB1,HSPD1,CTSD,FBLN1,HSPE1,PSMA3,C5,HSP90B1,APP,YWHAE,TFPI,VTN,SET,GPC3,SERPINA7,GSN,SERPINA3,SERPIND1,APOA2,C4B,FN1,SERPINF2,ITIH2,THBS1,PROS1,C3,A2M,SERPINA5,APOA1,SERPINA6,AHSG,SERPINA1,AMBP,SERPINF1,ITIH3,APOC3,SERPINC1,APOH,AGT,PEBP1,PRDX3,PSME1,SOD1,SERPINA11,APLP2,NPM1,ICAM1,SERPINA4,GDI2
GO:BP	response to organic substance	GO:0010033	1.71837e-11	10.7649	3412	217	90	18117	AGRN,TFRC,FASN,CTSC,AKR1C1,HSPA4,XRCC5,GPI,GAPDH,PSMA7,PSMB6,HSP90AB1,HSPD1,NME2,IDH1,HSP90AA1,KRT19,LDHA,HSPE1,TALDO1,ATIC,PSMA3,PSMA1,HSPA8,TUBA1B,HSPA1B,ACTN4,GGH,PKM,HSP90B1,PSMA5,RBP4,APP,TFPI,EEF2,YWHAZ,VTN,CPN1,P4HB,GPC3,GSN,PTPRK,FGG,APOB,APOE,APOM,HSPA5,APOA2,C4B,FN1,SERPINF2,CALR,ACTG1,PDIA3,THBS1,LRG1,CLU,APOA1,AHSG,DAG1,SERPINF1,VASN,PCSK9,AGT,GOT1,PRDX3,CFL1,KRT8,PSME1,PSMB5,PSMA6,KR…
GO:BP	protein activation cascade	GO:0072376	2.20446e-11	10.6567	28	217	11	18117	FBLN1,FGA,TFPI,F10,FGG,FN1,F2,A2M,SERPINC1,APOH,FGB
GO:BP	blood coagulation, fibrin clot formation	GO:0072378	2.20446e-11	10.6567	28	217	11	18117	FBLN1,FGA,TFPI,F10,FGG,FN1,F2,A2M,SERPINC1,APOH,FGB
GO:BP	primary metabolic process	GO:0044238	4.51979e-11	10.3449	10584	217	179	18117	AGRN,TFRC,GLUD1,ACAT2,FASN,RAN,UBA1,AHCY,PGAM1,CTSC,RPSA,ALDH1A1,AKR1C1,XRCC5,GPI,GAPDH,PSMA7,PSMB6,QPRT,HSP90AB1,HSPD1,EEF1G,NME2,IDH1,CTSD,HSP90AA1,PGK1,LDHA,FBLN1,HSPE1,TALDO1,RPLP2,GSR,PDIA4,ENO1,ATIC,PSMA3,PSAT1,C5,PSMA1,HSPA8,ALDOA,HSPA1B,XRCC6,ACTN4,GGH,CLTC,PKM,MDH1,FGA,HSP90B1,PSMA5,TKT,TPI1,RBP4,APP,YWHAE,TFPI,EEF2,YWHAZ,PSAP,VTN,CPN1,SET,P4HB,GPC3,SERPINA7,SPTBN1,CDH2,GSN,PTPRK,F10,SER…
GO:BP	regulation of response to stress	GO:0080134	5.05543e-11	10.2962	1443	217	54	18117	CTSC,XRCC5,PSMA7,PSMB6,HSP90AB1,HSPD1,HSP90AA1,ENO1,PSMA3,PSMA1,HSPA8,PRDX1,HSPA1B,XRCC6,FGA,PSMA5,APP,YWHAE,TFPI,VTN,P4HB,FGG,APOE,HSPA5,PROC,F2,SERPINF2,ACTG1,THBS1,PROS1,C3,A2M,CLU,APOA1,AHSG,AMBP,SERPINF1,SERPINC1,APOH,AGT,PSME1,PSMB5,PSMA6,CADM1,SOD1,MIF,FGB,YBX1,SPP1,NPM1,PGC,HNRNPK,LMNA,PSMB4
GO:BP	organic substance metabolic process	GO:0071704	5.31629e-11	10.2744	11326	217	186	18117	AGRN,TFRC,GLUD1,ACAT2,FASN,RAN,UBA1,AHCY,PGAM1,CTSC,RPSA,ALDH1A1,AKR1C1,XRCC5,GPI,GAPDH,PSMA7,PSMB6,QPRT,HSP90AB1,HSPD1,EEF1G,NME2,IDH1,CTSD,HSP90AA1,PGK1,LDHA,FBLN1,HSPE1,TALDO1,RPLP2,GSR,PDIA4,ENO1,ATIC,PSMA3,PSAT1,C5,PSMA1,HSPA8,CLIC1,ALDOA,HSPA1B,XRCC6,ACTN4,GGH,CLTC,PKM,MDH1,FGA,HSP90B1,PSMA5,TKT,TPI1,RBP4,APP,YWHAE,BTD,TFPI,EEF2,YWHAZ,PSAP,VTN,CPN1,SET,P4HB,GPC3,SERPINA7,SPTBN1,CDH2,GSN,PTP…
GO:BP	cellular response to cytokine stimulus	GO:0071345	8.41408e-11	10.075	1132	217	47	18117	TFRC,FASN,XRCC5,GAPDH,PSMA7,PSMB6,HSP90AB1,HSPD1,HSP90AA1,TALDO1,ATIC,PSMA3,PSMA1,HSPA8,TUBA1B,HSPA1B,ACTN4,HSP90B1,PSMA5,TFPI,YWHAZ,P4HB,GSN,FGG,APOB,HSPA5,FN1,ACTG1,PDIA3,THBS1,APOA1,CFL1,KRT8,PSME1,PSMB5,PSMA6,KRT18,RPLP0,HSPA9,SOD1,MIF,FGB,CRLF1,ICAM1,NCL,LMNB1,PSMB4
GO:BP	biological process involved in symbiotic interaction	GO:0044403	8.9075e-11	10.0502	1001	217	44	18117	TFRC,RAN,RPSA,XRCC5,GAPDH,PSMA7,PSMB6,HSP90AB1,HSPD1,HSP90AA1,KRT19,FBLN1,RPLP2,PSMA3,HSPA8,HSPA1B,XRCC6,YWHAE,SET,P4HB,GSN,APOE,CFI,APOA2,FN1,F2,DAG1,AMBP,CFL1,KRT8,PSMB5,KRT18,SSB,ILF3,RPLP0,CADM1,RPL12,KPNB1,NPM1,FUCA2,ICAM1,CTSB,HNRNPK,PSMB4
GO:BP	defense response	GO:0006952	9.11394e-11	10.0403	1818	217	61	18117	AHCY,CTSC,XRCC5,ATRN,GAPDH,PSMA7,PSMB6,HSP90AB1,HSPD1,HSP90AA1,PSMA3,C5,PSMA1,PRDX1,XRCC6,TUBB4B,FGA,PSMA5,APP,TUBB,GSN,SERPINA3,APOE,C4BPA,CFI,C4B,FN1,PROC,F2,SERPINF2,ACTG1,THBS1,C3,A2M,LGALS3BP,RNASET2,CLU,APOA1,C2,AHSG,SERPINA1,SERPINF1,ORM2,SAA4,SERPINC1,ORM1,TF,AGT,HP,PSME1,PSMB5,PSMA6,ILF3,CADM1,SOD1,MIF,FGB,SPP1,ICAM1,PGC,PSMB4
GO:BP	regulation of cellular protein metabolic process	GO:0032268	3.44316e-10	9.46304	2541	217	73	18117	TFRC,CTSC,XRCC5,GPI,GAPDH,HSP90AB1,HSPD1,CTSD,HSP90AA1,FBLN1,HSPE1,ENO1,C5,HSPA1B,XRCC6,PKM,HSP90B1,APP,YWHAE,TFPI,EEF2,VTN,SET,GPC3,SERPINA7,GSN,SERPINA3,APOE,SERPIND1,HSPA5,C4B,FN1,F2,SERPINF2,CALR,ITIH2,THBS1,PROS1,C3,A2M,SERPINA5,SDC4,RELN,CLU,APOA1,SERPINA6,AHSG,DAG1,SERPINA1,AMBP,SERPINF1,ITIH3,SERPINC1,TF,PCSK9,AGT,PEBP1,PRDX3,PSME1,ILF3,SOD1,MIF,SERPINA11,YBX1,CRLF1,APLP2,IGF2,NPM1,ICAM1,…
GO:BP	response to cytokine	GO:0034097	3.79868e-10	9.42037	1226	217	48	18117	TFRC,FASN,XRCC5,GAPDH,PSMA7,PSMB6,HSP90AB1,HSPD1,HSP90AA1,TALDO1,ATIC,PSMA3,PSMA1,HSPA8,TUBA1B,HSPA1B,ACTN4,HSP90B1,PSMA5,APP,TFPI,YWHAZ,P4HB,GSN,FGG,APOB,HSPA5,FN1,ACTG1,PDIA3,THBS1,APOA1,CFL1,KRT8,PSME1,PSMB5,PSMA6,KRT18,RPLP0,HSPA9,SOD1,MIF,FGB,CRLF1,ICAM1,NCL,LMNB1,PSMB4
GO:BP	regulation of protein metabolic process	GO:0051246	8.37529e-10	9.077	2704	217	75	18117	TFRC,CTSC,XRCC5,GPI,GAPDH,HSP90AB1,HSPD1,CTSD,HSP90AA1,FBLN1,HSPE1,ENO1,PSMA3,C5,HSPA1B,XRCC6,PKM,HSP90B1,APP,YWHAE,TFPI,EEF2,VTN,SET,GPC3,SERPINA7,GSN,SERPINA3,APOE,C4BPA,SERPIND1,HSPA5,C4B,FN1,F2,SERPINF2,CALR,ITIH2,THBS1,PROS1,C3,A2M,SERPINA5,SDC4,RELN,CLU,APOA1,SERPINA6,AHSG,DAG1,SERPINA1,AMBP,SERPINF1,ITIH3,SERPINC1,TF,PCSK9,AGT,PEBP1,PRDX3,PSME1,ILF3,SOD1,MIF,SERPINA11,YBX1,CRLF1,APLP2,IGF2…
GO:BP	negative regulation of catalytic activity	GO:0043086	8.65964e-10	9.0625	851	217	39	18117	GPI,GAPDH,C5,APP,YWHAE,TFPI,VTN,SET,GPC3,SERPINA7,SERPINA3,APOE,SERPIND1,APOA2,C4B,SERPINF2,ITIH2,THBS1,PROS1,C3,A2M,SERPINA5,APOA1,SERPINA6,AHSG,SERPINA1,AMBP,SERPINF1,ITIH3,APOC3,SERPINC1,AGT,HP,PEBP1,PRDX3,SERPINA11,APLP2,NPM1,SERPINA4
GO:BP	negative regulation of blood coagulation	GO:0030195	1.13679e-09	8.94432	50	217	12	18117	FGA,TFPI,VTN,FGG,APOE,PROC,F2,SERPINF2,THBS1,PROS1,APOH,FGB
GO:BP	regulation of catalytic activity	GO:0050790	1.18272e-09	8.92712	2545	217	72	18117	AGRN,ALDH1A1,XRCC5,GPI,GAPDH,HSP90AB1,HSPD1,CTSD,HSP90AA1,FBLN1,HSPE1,PSMA3,C5,XRCC6,HSP90B1,APP,YWHAE,TFPI,PSAP,VTN,SET,GPC3,SERPINA7,GSN,SERPINA3,APOE,SERPIND1,APOC4-APOC2,APOA2,C4B,FN1,F2,SERPINF2,ITIH2,THBS1,PROS1,C3,A2M,SERPINA5,SDC4,RELN,CLU,APOA1,SERPINA6,AHSG,DAG1,SERPINA1,CPN2,AMBP,SERPINF1,ITIH3,APOC3,SERPINC1,APOH,TF,AGT,HP,PEBP1,PRDX3,PSME1,CAP1,SOD1,SERPINA11,APLP2,IGF2,NPM1,ICAM1,CT…
GO:BP	negative regulation of cellular protein metabolic process	GO:0032269	1.32066e-09	8.87921	1082	217	44	18117	GPI,GAPDH,HSP90AB1,FBLN1,C5,HSPA1B,APP,YWHAE,TFPI,VTN,SET,GPC3,SERPINA7,SERPINA3,APOE,SERPIND1,C4B,F2,SERPINF2,CALR,ITIH2,THBS1,PROS1,C3,A2M,SERPINA5,SERPINA6,AHSG,SERPINA1,AMBP,SERPINF1,ITIH3,SERPINC1,AGT,PEBP1,PRDX3,ILF3,SERPINA11,YBX1,APLP2,NPM1,NCL,SERPINA4,DKK1
GO:BP	organic substance catabolic process	GO:1901575	1.44064e-09	8.84145	2267	217	67	18117	AGRN,GLUD1,ACAT2,UBA1,AHCY,PGAM1,CTSC,RPSA,ALDH1A1,GPI,GAPDH,PSMA7,PSMB6,QPRT,HSP90AB1,IDH1,CTSD,HSP90AA1,PGK1,LDHA,RPLP2,ENO1,PSMA3,PSMA1,HSPA8,ALDOA,HSPA1B,CLTC,PKM,HSP90B1,PSMA5,TPI1,APP,YWHAZ,CPN1,SET,GPC3,APOB,APOE,C4BPA,HSPA5,APOA2,SDC4,RNASET2,CLU,APOA1,AMBP,APOC3,NOTUM,PCSK9,GOT1,PSME1,PSMB5,PSMA6,SSB,RPLP0,RPL12,ECH1,YBX1,KPNB1,HNRNPC,SPP1,NPM1,FUCA2,CTSB,PSMB4,VCAN
GO:BP	negative regulation of hemostasis	GO:1900047	1.47105e-09	8.83237	51	217	12	18117	FGA,TFPI,VTN,FGG,APOE,PROC,F2,SERPINF2,THBS1,PROS1,APOH,FGB
GO:BP	metabolic process	GO:0008152	1.52826e-09	8.8158	11827	217	188	18117	AGRN,TFRC,GLUD1,ACAT2,FASN,RAN,UBA1,AHCY,PGAM1,CTSC,RPSA,ALDH1A1,AKR1C1,XRCC5,GPI,GAPDH,PSMA7,PSMB6,QPRT,HSP90AB1,HSPD1,EEF1G,NME2,IDH1,CTSD,HSP90AA1,PGK1,LDHA,FBLN1,HSPE1,TALDO1,RPLP2,GSR,PDIA4,ENO1,ATIC,PSMA3,PSAT1,C5,PSMA1,HSPA8,CLIC1,PRDX1,ALDOA,HSPA1B,XRCC6,ACTN4,GGH,CLTC,PKM,MDH1,FGA,HSP90B1,PSMA5,TKT,TPI1,RBP4,APP,YWHAE,BTD,TFPI,EEF2,YWHAZ,PSAP,VTN,CPN1,SET,P4HB,GPC3,SERPINA7,SPTBN1,CDH2,G…
GO:BP	hemostasis	GO:0007599	1.90742e-09	8.71955	351	217	25	18117	GPI,FBLN1,CLIC1,FGA,TFPI,YWHAZ,VTN,F10,FGG,APOE,SERPIND1,FN1,PROC,F2,SERPINF2,ACTG1,THBS1,PROS1,A2M,SERPINA5,SERPINA1,SERPINC1,APOH,F5,FGB
GO:BP	negative regulation of protein metabolic process	GO:0051248	2.68039e-09	8.5718	1151	217	45	18117	GPI,GAPDH,HSP90AB1,FBLN1,C5,HSPA1B,APP,YWHAE,TFPI,VTN,SET,GPC3,SERPINA7,SERPINA3,APOE,SERPIND1,C4B,F2,SERPINF2,CALR,ITIH2,THBS1,PROS1,C3,A2M,SERPINA5,CLU,SERPINA6,AHSG,SERPINA1,AMBP,SERPINF1,ITIH3,SERPINC1,AGT,PEBP1,PRDX3,ILF3,SERPINA11,YBX1,APLP2,NPM1,NCL,SERPINA4,DKK1
GO:BP	regulation of blood coagulation	GO:0030193	2.78005e-09	8.55595	68	217	13	18117	FGA,TFPI,VTN,FGG,APOE,PROC,F2,SERPINF2,THBS1,PROS1,SERPINC1,APOH,FGB
GO:BP	cellular response to chemical stimulus	GO:0070887	3.03008e-09	8.51855	3393	217	85	18117	AGRN,TFRC,FASN,AKR1C1,XRCC5,GAPDH,PSMA7,PSMB6,HSP90AB1,HSPD1,NME2,HSP90AA1,PGK1,TALDO1,GSR,ENO1,ATIC,PSMA3,C5,PSMA1,HSPA8,TUBA1B,PRDX1,HSPA1B,XRCC6,ACTN4,PKM,HSP90B1,PSMA5,APP,TFPI,EEF2,YWHAZ,VTN,P4HB,GPC3,GSN,PTPRK,FGG,APOB,APOE,APOM,HSPA5,FN1,CALR,ACTG1,PDIA3,THBS1,LRG1,CLU,APOA1,AHSG,DAG1,SERPINF1,ALB,VASN,TF,PCSK9,AGT,HP,GOT1,PRDX3,CFL1,KRT8,PSME1,PSMB5,PSMA6,KRT18,RPLP0,HSPA9,IGFBP1,SOD1,MIF…
GO:BP	negative regulation of biological process	GO:0048519	3.12882e-09	8.50462	5757	217	119	18117	TFRC,RAN,CTSC,SPTAN1,RPSA,ALDH1A1,XRCC5,GPI,GAPDH,PSMA7,PSMB6,HSP90AB1,HSPD1,NME2,PGK1,FBLN1,RPLP2,ENO1,PSMA3,C5,PSMA1,HSPA8,HSPA1B,XRCC6,ACTN4,CLTC,FGA,HSP90B1,PSMA5,RBP4,APP,YWHAE,TFPI,YWHAZ,VTN,SET,GPC3,SERPINA7,SPTBN1,CDH2,GSN,PTPRK,SERPINA3,FGG,APOE,APOM,C4BPA,SERPIND1,HSPA5,APOA2,C4B,FN1,PROC,F2,SERPINF2,CALR,ITIH2,THBS1,PROS1,C3,A2M,SERPINA5,SDC4,CLU,APOA1,SERPINA6,AHSG,DAG1,SERPINA1,AMBP,…
GO:BP	regulation of hemostasis	GO:1900046	3.38959e-09	8.46985	69	217	13	18117	FGA,TFPI,VTN,FGG,APOE,PROC,F2,SERPINF2,THBS1,PROS1,SERPINC1,APOH,FGB
GO:BP	nitrogen compound metabolic process	GO:0006807	3.76246e-09	8.42453	10078	217	170	18117	AGRN,TFRC,GLUD1,FASN,RAN,UBA1,AHCY,PGAM1,CTSC,RPSA,AKR1C1,XRCC5,GPI,GAPDH,PSMA7,PSMB6,QPRT,HSP90AB1,HSPD1,EEF1G,NME2,IDH1,CTSD,HSP90AA1,PGK1,LDHA,FBLN1,HSPE1,RPLP2,GSR,PDIA4,ENO1,ATIC,PSMA3,PSAT1,C5,PSMA1,HSPA8,CLIC1,ALDOA,HSPA1B,XRCC6,ACTN4,GGH,CLTC,PKM,FGA,HSP90B1,PSMA5,TPI1,APP,YWHAE,BTD,TFPI,EEF2,YWHAZ,PSAP,VTN,CPN1,SET,P4HB,GPC3,SERPINA7,SPTBN1,CDH2,GSN,PTPRK,F10,SERPINA3,FGG,TTR,PAICS,APOB,…
GO:BP	viral process	GO:0016032	4.66129e-09	8.33149	942	217	40	18117	TFRC,RAN,RPSA,XRCC5,PSMA7,PSMB6,HSP90AB1,HSPD1,HSP90AA1,KRT19,FBLN1,RPLP2,PSMA3,HSPA8,HSPA1B,XRCC6,YWHAE,SET,P4HB,GSN,APOE,CFI,APOA2,DAG1,AMBP,CFL1,KRT8,PSMB5,KRT18,SSB,ILF3,RPLP0,CADM1,RPL12,KPNB1,NPM1,ICAM1,CTSB,HNRNPK,PSMB4
GO:BP	negative regulation of coagulation	GO:0050819	4.90945e-09	8.30897	56	217	12	18117	FGA,TFPI,VTN,FGG,APOE,PROC,F2,SERPINF2,THBS1,PROS1,APOH,FGB
GO:BP	regulation of response to external stimulus	GO:0032101	8.63037e-09	8.06397	1051	217	42	18117	CTSC,XRCC5,PSMA7,PSMB6,HSP90AB1,HSPD1,HSP90AA1,PSMA3,C5,PSMA1,XRCC6,FGA,PSMA5,APP,TFPI,VTN,FGG,APOE,PROC,F2,SERPINF2,CALR,THBS1,PROS1,C3,A2M,APOA1,AHSG,SERPINF1,SERPINC1,APOH,AGT,PSME1,PSMB5,PSMA6,CADM1,SOD1,MIF,FGB,SPP1,PGC,PSMB4
GO:BP	regulation of coagulation	GO:0050818	1.04237e-08	7.98198	75	217	13	18117	FGA,TFPI,VTN,FGG,APOE,PROC,F2,SERPINF2,THBS1,PROS1,SERPINC1,APOH,FGB
GO:BP	blood coagulation	GO:0007596	1.04941e-08	7.97906	347	217	24	18117	FBLN1,CLIC1,FGA,TFPI,YWHAZ,VTN,F10,FGG,APOE,SERPIND1,FN1,PROC,F2,SERPINF2,ACTG1,THBS1,PROS1,A2M,SERPINA5,SERPINA1,SERPINC1,APOH,F5,FGB
GO:BP	small molecule metabolic process	GO:0044281	1.17654e-08	7.92939	1921	217	59	18117	GLUD1,ACAT2,FASN,RAN,AHCY,PGAM1,ALDH1A1,AKR1C1,GPI,GAPDH,PSMA7,PSMB6,QPRT,NME2,IDH1,PGK1,LDHA,TALDO1,GSR,ENO1,ATIC,PSMA3,PSAT1,PSMA1,ALDOA,PKM,MDH1,PSMA5,TKT,TPI1,RBP4,APP,BTD,TTR,PAICS,APOB,APOE,APOA2,C3,APOA1,APOC3,AFP,PCSK9,PLTP,GOT1,PSME1,PSMB5,PSMA6,MDH2,SOD1,ECH1,MIF,UGDH,KPNB1,IGF2,FUCA2,PSMB4,ACLY,FH
GO:BP	cellular metabolic process	GO:0044237	1.26471e-08	7.89801	10871	217	177	18117	AGRN,TFRC,GLUD1,ACAT2,FASN,RAN,UBA1,AHCY,PGAM1,CTSC,RPSA,ALDH1A1,AKR1C1,XRCC5,GPI,GAPDH,PSMA7,PSMB6,QPRT,HSP90AB1,HSPD1,EEF1G,NME2,IDH1,CTSD,HSP90AA1,PGK1,LDHA,FBLN1,HSPE1,TALDO1,RPLP2,GSR,PDIA4,ENO1,ATIC,PSMA3,PSAT1,C5,PSMA1,HSPA8,CLIC1,PRDX1,ALDOA,HSPA1B,XRCC6,ACTN4,GGH,CLTC,PKM,MDH1,FGA,HSP90B1,PSMA5,TKT,TPI1,RBP4,APP,YWHAE,BTD,TFPI,EEF2,YWHAZ,PSAP,VTN,CPN1,SET,P4HB,GPC3,SERPINA7,SPTBN1,CDH2,G…
GO:BP	multicellular organismal process	GO:0032501	1.30152e-08	7.88555	7946	217	145	18117	AGRN,TFRC,GLUD1,FASN,CTSC,SPTAN1,ALDH1A1,AKR1C1,XRCC5,GPI,ATRN,GAPDH,PSMA7,PSMB6,HSP90AB1,HSPD1,CLSTN1,NME2,IDH1,HSP90AA1,KRT19,PGK1,LDHA,FBLN1,HSPE1,ENO1,ATIC,PSMA3,C5,PSMA1,CLIC1,PRDX1,ALDOA,HSPA1B,XRCC6,CLTC,PKM,FGA,TPM3,NID1,PSMA5,TPI1,RBP4,APP,YWHAE,BTD,TFPI,EEF2,YWHAZ,PSAP,VTN,P4HB,GPC3,SPTBN1,CDH2,GSN,CLSTN3,FLNB,PTPRK,F10,SERPINA3,FGG,APOB,APOE,APOM,SERPIND1,HSPA5,APOA2,FN1,PROC,F2,SERPIN…
GO:BP	coagulation	GO:0050817	1.60186e-08	7.79538	354	217	24	18117	FBLN1,CLIC1,FGA,TFPI,YWHAZ,VTN,F10,FGG,APOE,SERPIND1,FN1,PROC,F2,SERPINF2,ACTG1,THBS1,PROS1,A2M,SERPINA5,SERPINA1,SERPINC1,APOH,F5,FGB
GO:BP	response to biotic stimulus	GO:0009607	2.12503e-08	7.67263	1626	217	53	18117	XRCC5,GAPDH,PSMA7,PSMB6,HSP90AB1,HSPD1,EEF1G,HSP90AA1,ENO1,PSMA3,C5,PSMA1,PRDX1,XRCC6,TUBB4B,FGA,PSMA5,APP,TUBB,TFPI,GPC3,GSN,APOB,APOE,C4BPA,CFI,HSPA5,C4B,F2,ACTG1,C3,LRG1,A2M,RNASET2,CLU,C2,TF,HP,BPIFB2,PRDX3,CFL1,KRT8,PSME1,PSMB5,PSMA6,ILF3,CADM1,MIF,FGB,FUCA2,ICAM1,PGC,PSMB4
GO:BP	response to other organism	GO:0051707	3.26346e-08	7.48632	1592	217	52	18117	XRCC5,GAPDH,PSMA7,PSMB6,HSP90AB1,HSPD1,EEF1G,HSP90AA1,ENO1,PSMA3,C5,PSMA1,PRDX1,XRCC6,TUBB4B,FGA,PSMA5,APP,TUBB,TFPI,GPC3,GSN,APOB,APOE,C4BPA,CFI,C4B,F2,ACTG1,C3,LRG1,A2M,RNASET2,CLU,C2,TF,HP,BPIFB2,PRDX3,CFL1,KRT8,PSME1,PSMB5,PSMA6,ILF3,CADM1,MIF,FGB,FUCA2,ICAM1,PGC,PSMB4
GO:BP	response to external biotic stimulus	GO:0043207	3.42001e-08	7.46597	1594	217	52	18117	XRCC5,GAPDH,PSMA7,PSMB6,HSP90AB1,HSPD1,EEF1G,HSP90AA1,ENO1,PSMA3,C5,PSMA1,PRDX1,XRCC6,TUBB4B,FGA,PSMA5,APP,TUBB,TFPI,GPC3,GSN,APOB,APOE,C4BPA,CFI,C4B,F2,ACTG1,C3,LRG1,A2M,RNASET2,CLU,C2,TF,HP,BPIFB2,PRDX3,CFL1,KRT8,PSME1,PSMB5,PSMA6,ILF3,CADM1,MIF,FGB,FUCA2,ICAM1,PGC,PSMB4
GO:BP	anatomical structure morphogenesis	GO:0009653	4.02546e-08	7.39518	2797	217	73	18117	AGRN,TFRC,SPTAN1,GPI,ATRN,PSMA7,PSMB6,HSP90AB1,HSP90AA1,KRT19,PGK1,FBLN1,PSMA3,C5,PSMA1,ALDOA,ACTN4,CLTC,PKM,FGA,PSMA5,RBP4,APP,YWHAZ,VTN,P4HB,GPC3,SPTBN1,CDH2,FGG,APOB,APOE,HSPA5,FN1,F2,SERPINF2,CALR,LAMC1,ACTG1,THBS1,CPE,C3,LRG1,SDC4,RELN,CLU,APOA1,DAG1,SERPINF1,APOH,AGT,CFL1,KRT8,PSME1,PSMB5,PSMA6,KRT18,CAP1,ACTN1,FGL1,SOD1,LAMB1,UGDH,DPYSL2,FGB,YBX1,ALCAM,IGF2,SPP1,ICAM1,NCL,PSMB4,DKK1
GO:BP	NAD metabolic process	GO:0019674	4.82224e-08	7.31675	52	217	11	18117	PGAM1,GPI,GAPDH,QPRT,PGK1,LDHA,ENO1,ALDOA,PKM,MDH1,TPI1
GO:BP	regulation of immune system process	GO:0002682	5.82594e-08	7.23463	1617	217	52	18117	TFRC,CTSC,XRCC5,GPI,PSMA7,PSMB6,HSP90AB1,HSPD1,NME2,HSP90AA1,PSMA3,C5,PSMA1,HSPA1B,XRCC6,PSMA5,RBP4,APP,VTN,CPN1,APOE,C4BPA,CFI,APOA2,C4B,F2,CALR,ACTG1,THBS1,PROS1,C3,A2M,SDC4,CLU,APOA1,C2,CPN2,AMBP,ORM2,ORM1,PSME1,PSMB5,PSMA6,FGL1,CADM1,HSPA9,SOD1,MIF,IGF2,ICAM1,PGC,PSMB4
GO:BP	carboxylic acid metabolic process	GO:0019752	6.17407e-08	7.20943	1024	217	40	18117	GLUD1,ACAT2,FASN,AHCY,PGAM1,AKR1C1,GPI,GAPDH,PSMA7,PSMB6,QPRT,IDH1,PGK1,LDHA,ENO1,ATIC,PSMA3,PSAT1,PSMA1,ALDOA,PKM,MDH1,PSMA5,TPI1,APP,BTD,C3,APOA1,APOC3,GOT1,PSME1,PSMB5,PSMA6,MDH2,ECH1,MIF,UGDH,PSMB4,ACLY,FH
GO:BP	developmental process	GO:0032502	7.30525e-08	7.13637	6628	217	127	18117	AGRN,TFRC,GLUD1,FASN,CTSC,SPTAN1,AKR1C1,XRCC5,GPI,ATRN,PSMA7,PSMB6,HSP90AB1,HSPD1,CLSTN1,NME2,IDH1,HSP90AA1,KRT19,PGK1,LDHA,FBLN1,HSPE1,ATIC,PSMA3,C5,PSMA1,CLIC1,PRDX1,ALDOA,HSPA1B,XRCC6,ACTN4,CLTC,PKM,FGA,NID1,PSMA5,TPI1,RBP4,APP,YWHAE,BTD,EEF2,YWHAZ,PSAP,VTN,P4HB,GPC3,SPTBN1,CDH2,GSN,CLSTN3,FLNB,PTPRK,FGG,APOB,APOE,HSPA5,FN1,PROC,F2,SERPINF2,CALR,LAMC1,ACTG1,THBS1,CPE,C3,LRG1,A2M,SERPINA5,SDC4,…
GO:BP	regulation of molecular function	GO:0065009	9.07593e-08	7.04211	3221	217	79	18117	AGRN,TFRC,RAN,ALDH1A1,XRCC5,GPI,GAPDH,HSP90AB1,HSPD1,CTSD,HSP90AA1,FBLN1,HSPE1,PSMA3,C5,HSPA1B,XRCC6,ACTN4,HSP90B1,APP,YWHAE,TFPI,PSAP,VTN,SET,GPC3,SERPINA7,GSN,SERPINA3,APOE,SERPIND1,APOC4-APOC2,APOA2,C4B,FN1,F2,SERPINF2,ITIH2,THBS1,PROS1,C3,A2M,SERPINA5,SDC4,RELN,CLU,APOA1,SERPINA6,AHSG,DAG1,SERPINA1,CPN2,AMBP,SERPINF1,ITIH3,APOC3,SERPINC1,APOH,TF,PCSK9,AGT,HP,PEBP1,PRDX3,PSME1,PSMA6,CAP1,SOD1,…
GO:BP	anatomical structure development	GO:0048856	9.45651e-08	7.02427	6106	217	120	18117	AGRN,TFRC,GLUD1,FASN,CTSC,SPTAN1,AKR1C1,XRCC5,GPI,ATRN,PSMA7,PSMB6,HSP90AB1,HSPD1,CLSTN1,NME2,IDH1,HSP90AA1,KRT19,PGK1,LDHA,FBLN1,ATIC,PSMA3,C5,PSMA1,PRDX1,ALDOA,HSPA1B,XRCC6,ACTN4,CLTC,PKM,FGA,NID1,PSMA5,TPI1,RBP4,APP,YWHAE,BTD,EEF2,YWHAZ,PSAP,VTN,P4HB,GPC3,SPTBN1,CDH2,GSN,CLSTN3,FLNB,PTPRK,FGG,APOB,APOE,HSPA5,FN1,PROC,F2,SERPINF2,CALR,LAMC1,ACTG1,THBS1,CPE,C3,LRG1,SERPINA5,SDC4,RELN,CLU,APOA1,A…
GO:BP	negative regulation of cellular process	GO:0048523	9.87799e-08	7.00533	5139	217	107	18117	TFRC,CTSC,SPTAN1,XRCC5,GPI,GAPDH,PSMA7,PSMB6,HSP90AB1,HSPD1,NME2,FBLN1,ENO1,PSMA3,C5,PSMA1,HSPA8,HSPA1B,XRCC6,ACTN4,CLTC,FGA,HSP90B1,PSMA5,RBP4,APP,YWHAE,TFPI,YWHAZ,VTN,SET,GPC3,SERPINA7,SPTBN1,CDH2,GSN,PTPRK,SERPINA3,FGG,APOE,APOM,SERPIND1,HSPA5,APOA2,C4B,PROC,F2,SERPINF2,CALR,ITIH2,THBS1,PROS1,C3,A2M,SERPINA5,SDC4,CLU,APOA1,SERPINA6,AHSG,DAG1,SERPINA1,AMBP,SERPINF1,ITIH3,APOC3,NOTUM,SERPINC1,AL…
GO:BP	catabolic process	GO:0009056	1.31218e-07	6.88201	2744	217	71	18117	AGRN,GLUD1,ACAT2,UBA1,AHCY,PGAM1,CTSC,RPSA,ALDH1A1,GPI,GAPDH,PSMA7,PSMB6,QPRT,HSP90AB1,IDH1,CTSD,HSP90AA1,PGK1,LDHA,RPLP2,ENO1,PSMA3,PSMA1,HSPA8,PRDX1,ALDOA,HSPA1B,CLTC,PKM,HSP90B1,PSMA5,TPI1,APP,YWHAZ,PSAP,CPN1,SET,GPC3,APOB,APOE,C4BPA,HSPA5,APOA2,SDC4,RNASET2,CLU,APOA1,AMBP,APOC3,NOTUM,PCSK9,HP,GOT1,PRDX3,PSME1,PSMB5,PSMA6,SSB,RPLP0,RPL12,ECH1,YBX1,KPNB1,HNRNPC,SPP1,NPM1,FUCA2,CTSB,PSMB4,VCAN
GO:BP	oxoacid metabolic process	GO:0043436	1.61407e-07	6.79208	1057	217	40	18117	GLUD1,ACAT2,FASN,AHCY,PGAM1,AKR1C1,GPI,GAPDH,PSMA7,PSMB6,QPRT,IDH1,PGK1,LDHA,ENO1,ATIC,PSMA3,PSAT1,PSMA1,ALDOA,PKM,MDH1,PSMA5,TPI1,APP,BTD,C3,APOA1,APOC3,GOT1,PSME1,PSMB5,PSMA6,MDH2,ECH1,MIF,UGDH,PSMB4,ACLY,FH
GO:BP	negative regulation of response to wounding	GO:1903035	1.76862e-07	6.75237	93	217	13	18117	FGA,TFPI,VTN,FGG,APOE,PROC,F2,SERPINF2,THBS1,PROS1,APOH,FGB,SPP1
GO:BP	positive regulation of immune system process	GO:0002684	2.02477e-07	6.69362	1065	217	40	18117	TFRC,CTSC,XRCC5,GPI,PSMA7,PSMB6,HSP90AB1,HSPD1,HSP90AA1,PSMA3,C5,PSMA1,XRCC6,PSMA5,RBP4,APP,VTN,CPN1,C4BPA,CFI,C4B,F2,CALR,ACTG1,THBS1,PROS1,C3,A2M,CLU,C2,CPN2,PSME1,PSMB5,PSMA6,CADM1,MIF,IGF2,ICAM1,PGC,PSMB4
GO:BP	cellular response to organic substance	GO:0071310	2.24207e-07	6.64935	2776	217	71	18117	TFRC,FASN,AKR1C1,XRCC5,GAPDH,PSMA7,PSMB6,HSP90AB1,HSPD1,NME2,HSP90AA1,TALDO1,ATIC,PSMA3,PSMA1,HSPA8,TUBA1B,HSPA1B,ACTN4,PKM,HSP90B1,PSMA5,APP,TFPI,EEF2,YWHAZ,VTN,P4HB,GPC3,GSN,PTPRK,FGG,APOB,HSPA5,FN1,CALR,ACTG1,PDIA3,THBS1,LRG1,CLU,APOA1,AHSG,DAG1,SERPINF1,VASN,PCSK9,AGT,GOT1,CFL1,KRT8,PSME1,PSMB5,PSMA6,KRT18,RPLP0,HSPA9,IGFBP1,SOD1,MIF,FGB,CRLF1,IGF2,SPP1,NPM1,ICAM1,CTSB,NCL,LMNB1,LMNA,PSMB4
GO:BP	negative regulation of metabolic process	GO:0009892	2.42409e-07	6.61545	3479	217	82	18117	RAN,RPSA,ALDH1A1,XRCC5,GPI,GAPDH,PSMA7,PSMB6,HSP90AB1,HSPD1,FBLN1,RPLP2,ENO1,PSMA3,C5,PSMA1,HSPA8,HSPA1B,XRCC6,CLTC,PSMA5,APP,YWHAE,TFPI,YWHAZ,VTN,SET,GPC3,SERPINA7,PTPRK,SERPINA3,APOE,SERPIND1,APOA2,C4B,FN1,F2,SERPINF2,CALR,ITIH2,THBS1,PROS1,C3,A2M,SERPINA5,CLU,APOA1,SERPINA6,AHSG,SERPINA1,AMBP,SERPINF1,ITIH3,APOC3,SERPINC1,ORM1,PCSK9,AGT,HP,GOT1,PEBP1,PRDX3,PSME1,PSMB5,PSMA6,SSB,ILF3,RPLP0,SOD1…
GO:BP	plasma lipoprotein particle remodeling	GO:0034369	2.80822e-07	6.55157	33	217	9	18117	APOB,APOE,APOM,APOA2,APOA1,APOC3,ALB,AGT,PLTP
GO:BP	protein-lipid complex remodeling	GO:0034368	2.80822e-07	6.55157	33	217	9	18117	APOB,APOE,APOM,APOA2,APOA1,APOC3,ALB,AGT,PLTP
GO:BP	NADH metabolic process	GO:0006734	3.00397e-07	6.5223	46	217	10	18117	PGAM1,GPI,GAPDH,PGK1,ENO1,ALDOA,PKM,MDH1,TPI1,MDH2
GO:BP	negative regulation of wound healing	GO:0061045	3.03104e-07	6.51841	78	217	12	18117	FGA,TFPI,VTN,FGG,APOE,PROC,F2,SERPINF2,THBS1,PROS1,APOH,FGB
GO:BP	proteasomal ubiquitin-independent protein catabolic process	GO:0010499	3.4005e-07	6.46846	23	217	8	18117	PSMA7,PSMB6,PSMA3,PSMA1,PSMA5,PSMB5,PSMA6,PSMB4
GO:BP	monosaccharide biosynthetic process	GO:0046364	3.47417e-07	6.45915	98	217	13	18117	PGAM1,GPI,GAPDH,PGK1,TALDO1,ENO1,ALDOA,MDH1,TKT,TPI1,RBP4,GOT1,MDH2
GO:BP	regulation of anatomical structure morphogenesis	GO:0022603	4.01145e-07	6.3967	1042	217	39	18117	TFRC,PSMA7,PSMB6,PGK1,FBLN1,PSMA3,C5,PSMA1,ALDOA,ACTN4,CLTC,PKM,FGA,PSMA5,P4HB,GPC3,CDH2,FGG,FN1,F2,CALR,THBS1,C3,LRG1,RELN,APOA1,DAG1,SERPINF1,APOH,AGT,CFL1,PSME1,PSMB5,PSMA6,FGB,SPP1,ICAM1,PSMB4,DKK1
GO:BP	organic acid metabolic process	GO:0006082	4.05012e-07	6.39253	1090	217	40	18117	GLUD1,ACAT2,FASN,AHCY,PGAM1,AKR1C1,GPI,GAPDH,PSMA7,PSMB6,QPRT,IDH1,PGK1,LDHA,ENO1,ATIC,PSMA3,PSAT1,PSMA1,ALDOA,PKM,MDH1,PSMA5,TPI1,APP,BTD,C3,APOA1,APOC3,GOT1,PSME1,PSMB5,PSMA6,MDH2,ECH1,MIF,UGDH,PSMB4,ACLY,FH
GO:BP	protein-containing complex remodeling	GO:0034367	5.03561e-07	6.29795	35	217	9	18117	APOB,APOE,APOM,APOA2,APOA1,APOC3,ALB,AGT,PLTP
GO:BP	plasminogen activation	GO:0031639	5.04849e-07	6.29684	24	217	8	18117	PGK1,ENO1,FGA,FGG,SERPINF2,THBS1,APOH,FGB
GO:BP	system development	GO:0048731	5.06803e-07	6.29516	5052	217	104	18117	AGRN,TFRC,GLUD1,FASN,CTSC,SPTAN1,XRCC5,ATRN,PSMA7,PSMB6,HSP90AB1,HSPD1,CLSTN1,NME2,IDH1,HSP90AA1,KRT19,PGK1,LDHA,ATIC,PSMA3,C5,PSMA1,PRDX1,HSPA1B,XRCC6,CLTC,PKM,NID1,PSMA5,RBP4,APP,YWHAE,BTD,EEF2,YWHAZ,PSAP,GPC3,SPTBN1,CDH2,GSN,CLSTN3,FLNB,PTPRK,APOB,APOE,HSPA5,FN1,F2,SERPINF2,CALR,LAMC1,ACTG1,THBS1,CPE,C3,LRG1,SERPINA5,SDC4,RELN,CLU,APOA1,AHSG,MATN3,DAG1,KRT10,SERPINF1,AFP,SERPINC1,VASN,APOH,TF,…
GO:BP	endocytosis	GO:0006897	6.00851e-07	6.22123	696	217	31	18117	TFRC,HSP90AA1,CLTC,HSP90B1,APP,VTN,GPC3,GSN,APOB,APOE,C4BPA,CFI,C4B,CALR,ACTG1,THBS1,C3,LGALS3BP,CLU,APOA1,AHSG,AMBP,APOC3,ALB,TF,PCSK9,HP,CAP1,DPYSL2,HNRNPK,DKK1
GO:BP	cellular developmental process	GO:0048869	6.29407e-07	6.20107	4428	217	95	18117	AGRN,TFRC,FASN,SPTAN1,AKR1C1,XRCC5,ATRN,PSMA7,PSMB6,HSP90AB1,NME2,HSP90AA1,KRT19,PGK1,FBLN1,HSPE1,PSMA3,PSMA1,CLIC1,HSPA1B,XRCC6,ACTN4,CLTC,FGA,PSMA5,APP,EEF2,YWHAZ,PSAP,VTN,P4HB,GPC3,SPTBN1,CDH2,GSN,FLNB,PTPRK,FGG,APOB,APOE,HSPA5,FN1,PROC,F2,SERPINF2,CALR,LAMC1,ACTG1,THBS1,C3,LRG1,A2M,SDC4,RELN,CLU,APOA1,DAG1,KRT10,SERPINF1,VASN,TF,PCSK9,AGT,KRT9,GOT1,PRDX3,CFL1,KRT8,PSME1,PSMB5,PSMA6,KRT18,ACTN…
GO:BP	acute-phase response	GO:0006953	7.26056e-07	6.13903	50	217	10	18117	SERPINA3,FN1,F2,SERPINF2,AHSG,SERPINA1,ORM2,SAA4,ORM1,HP
GO:BP	response to abiotic stimulus	GO:0009628	7.46839e-07	6.12677	1261	217	43	18117	AHCY,XRCC5,GPI,PSMA7,PSMB6,HSP90AB1,HSPD1,HSP90AA1,PGK1,LDHA,ENO1,PSMA3,PSMA1,HSPA8,HSPA1B,XRCC6,ACTN4,PKM,HSP90B1,PSMA5,APP,YWHAE,P4HB,CDH2,GSN,PTPRK,HSPA5,ACTG1,THBS1,DAG1,SERPINF1,VASN,AGT,GOT1,KRT8,PSME1,PSMB5,PSMA6,SOD1,NPM1,ICAM1,LMNA,PSMB4
GO:BP	regulation of developmental process	GO:0050793	7.63157e-07	6.11739	2605	217	67	18117	AGRN,TFRC,CTSC,XRCC5,ATRN,PSMA7,PSMB6,HSP90AB1,CLSTN1,NME2,PGK1,FBLN1,PSMA3,C5,PSMA1,CLIC1,ALDOA,HSPA1B,XRCC6,ACTN4,CLTC,PKM,FGA,PSMA5,RBP4,APP,YWHAZ,P4HB,GPC3,CDH2,CLSTN3,FGG,APOB,APOE,FN1,PROC,F2,SERPINF2,CALR,THBS1,C3,LRG1,RELN,APOA1,AHSG,DAG1,KRT10,SERPINF1,VASN,APOH,AGT,CFL1,PSME1,PSMB5,PSMA6,HSPA9,SOD1,MIF,DPYSL2,FGB,YBX1,IGF2,SPP1,ICAM1,LMNA,PSMB4,DKK1
GO:BP	multicellular organism development	GO:0007275	8.69941e-07	6.06051	5613	217	111	18117	AGRN,TFRC,GLUD1,FASN,CTSC,SPTAN1,XRCC5,GPI,ATRN,PSMA7,PSMB6,HSP90AB1,HSPD1,CLSTN1,NME2,IDH1,HSP90AA1,KRT19,PGK1,LDHA,FBLN1,ATIC,PSMA3,C5,PSMA1,PRDX1,HSPA1B,XRCC6,CLTC,PKM,NID1,PSMA5,TPI1,RBP4,APP,YWHAE,BTD,EEF2,YWHAZ,PSAP,VTN,GPC3,SPTBN1,CDH2,GSN,CLSTN3,FLNB,PTPRK,APOB,APOE,HSPA5,FN1,PROC,F2,SERPINF2,CALR,LAMC1,ACTG1,THBS1,CPE,C3,LRG1,SERPINA5,SDC4,RELN,CLU,APOA1,AHSG,MATN3,DAG1,KRT10,SERPINF1,AF…
GO:BP	fibrinolysis	GO:0042730	1.05053e-06	5.97859	26	217	8	18117	FGA,FGG,F2,SERPINF2,THBS1,PROS1,APOH,FGB
GO:BP	retinoid metabolic process	GO:0001523	1.06535e-06	5.97251	107	217	13	18117	AGRN,ALDH1A1,AKR1C1,RBP4,GPC3,TTR,APOB,APOE,APOM,APOA2,SDC4,APOA1,APOC3
GO:BP	regulation of plasma lipoprotein particle levels	GO:0097006	1.06535e-06	5.97251	107	217	13	18117	CLTC,P4HB,APOB,APOE,APOM,APOA2,APOA1,APOC3,ALB,PCSK9,AGT,PLTP,HNRNPK
GO:BP	plasma lipoprotein particle organization	GO:0071827	1.09509e-06	5.96055	52	217	10	18117	P4HB,APOB,APOE,APOM,APOA2,APOA1,APOC3,ALB,AGT,PLTP
GO:BP	wound healing	GO:0042060	1.114e-06	5.95311	549	217	27	18117	FBLN1,CLIC1,FGA,TFPI,YWHAZ,VTN,GSN,F10,FGG,APOE,SERPIND1,FN1,PROC,F2,SERPINF2,ACTG1,THBS1,PROS1,A2M,SERPINA5,SDC4,DAG1,SERPINA1,SERPINC1,APOH,F5,FGB
GO:BP	response to wounding	GO:0009611	1.22208e-06	5.9129	674	217	30	18117	FBLN1,CLIC1,FGA,TFPI,YWHAZ,VTN,GSN,F10,FGG,APOE,SERPIND1,FN1,PROC,F2,SERPINF2,ACTG1,THBS1,PROS1,A2M,SERPINA5,SDC4,APOA1,DAG1,SERPINA1,SERPINC1,APOH,F5,SOD1,FGB,SPP1
GO:BP	response to hypoxia	GO:0001666	1.32079e-06	5.87917	367	217	22	18117	AHCY,PSMA7,PSMB6,HSPD1,PGK1,LDHA,ENO1,PSMA3,PSMA1,ACTN4,PKM,HSP90B1,PSMA5,P4HB,THBS1,VASN,PSME1,PSMB5,PSMA6,ICAM1,LMNA,PSMB4
GO:BP	glucose catabolic process to pyruvate	GO:0061718	1.47757e-06	5.83045	27	217	8	18117	PGAM1,GPI,GAPDH,PGK1,ENO1,ALDOA,PKM,TPI1
GO:BP	NADH regeneration	GO:0006735	1.47757e-06	5.83045	27	217	8	18117	PGAM1,GPI,GAPDH,PGK1,ENO1,ALDOA,PKM,TPI1
GO:BP	canonical glycolysis	GO:0061621	1.47757e-06	5.83045	27	217	8	18117	PGAM1,GPI,GAPDH,PGK1,ENO1,ALDOA,PKM,TPI1
GO:BP	regulation of complement activation	GO:0030449	1.51103e-06	5.82073	110	217	13	18117	C5,VTN,CPN1,C4BPA,CFI,C4B,F2,PROS1,C3,A2M,CLU,C2,CPN2
GO:BP	regulation of humoral immune response	GO:0002920	1.55808e-06	5.80741	133	217	14	18117	C5,VTN,CPN1,C4BPA,CFI,C4B,F2,PROS1,C3,A2M,CLU,C2,CPN2,PGC
GO:BP	macromolecule localization	GO:0033036	1.60968e-06	5.79326	3218	217	76	18117	AGRN,TFRC,GLUD1,RAN,RPSA,AKR1C1,HSPA4,XRCC5,HSP90AB1,HSPD1,CLSTN1,IDH1,CTSD,HSP90AA1,RPLP2,PDIA4,HSPA8,ACTN4,CLTC,FGA,HSP90B1,RBP4,YWHAE,YWHAZ,PSAP,GPC3,SPTBN1,CDH2,GSN,CLSTN3,PTPRK,FGG,APOB,APOE,APOM,APOC4-APOC2,HSPA5,APOA2,F2,CALR,ACTG1,THBS1,CPE,C3,SERPINA5,RELN,CLU,APOA1,DAG1,APOC3,APOH,TF,AZGP1,PCSK9,AGT,PLTP,KRT18,SSB,RPLP0,HSPA9,RPL12,ECH1,DPYSL2,CUTA,FGB,YBX1,CCT8,KPNB1,CCT3,NASP,SPP1,NPM…
GO:BP	high-density lipoprotein particle remodeling	GO:0034375	1.98595e-06	5.70203	18	217	7	18117	APOE,APOM,APOA2,APOA1,APOC3,ALB,PLTP
GO:BP	glycolytic process through glucose-6-phosphate	GO:0061620	2.04741e-06	5.6888	28	217	8	18117	PGAM1,GPI,GAPDH,PGK1,ENO1,ALDOA,PKM,TPI1
GO:BP	regulation of wound healing	GO:0061041	2.09668e-06	5.67847	136	217	14	18117	FGA,TFPI,VTN,FGG,APOE,PROC,F2,SERPINF2,ACTG1,THBS1,PROS1,SERPINC1,APOH,FGB
GO:BP	diterpenoid metabolic process	GO:0016101	2.12001e-06	5.67366	113	217	13	18117	AGRN,ALDH1A1,AKR1C1,RBP4,GPC3,TTR,APOB,APOE,APOM,APOA2,SDC4,APOA1,APOC3
GO:BP	negative regulation of macromolecule metabolic process	GO:0010605	2.24857e-06	5.64809	3241	217	76	18117	RAN,RPSA,XRCC5,GPI,GAPDH,PSMA7,PSMB6,HSP90AB1,FBLN1,RPLP2,ENO1,PSMA3,C5,PSMA1,HSPA8,HSPA1B,XRCC6,CLTC,PSMA5,APP,YWHAE,TFPI,YWHAZ,VTN,SET,GPC3,SERPINA7,PTPRK,SERPINA3,APOE,SERPIND1,APOA2,C4B,FN1,F2,SERPINF2,CALR,ITIH2,THBS1,PROS1,C3,A2M,SERPINA5,CLU,APOA1,SERPINA6,AHSG,SERPINA1,AMBP,SERPINF1,ITIH3,SERPINC1,ORM1,PCSK9,AGT,PEBP1,PRDX3,PSME1,PSMB5,PSMA6,SSB,ILF3,RPLP0,RPL12,MIF,SERPINA11,YBX1,APLP2,I…
GO:BP	activation of immune response	GO:0002253	2.34284e-06	5.63026	568	217	27	18117	XRCC5,PSMA7,PSMB6,HSP90AB1,HSP90AA1,PSMA3,C5,PSMA1,XRCC6,PSMA5,VTN,CPN1,C4BPA,CFI,C4B,F2,ACTG1,PROS1,C3,A2M,CLU,C2,CPN2,PSME1,PSMB5,PSMA6,PSMB4
GO:BP	protein-lipid complex subunit organization	GO:0071825	2.36409e-06	5.62634	56	217	10	18117	P4HB,APOB,APOE,APOM,APOA2,APOA1,APOC3,ALB,AGT,PLTP
GO:BP	acute inflammatory response	GO:0002526	2.36786e-06	5.62564	114	217	13	18117	SERPINA3,FN1,F2,SERPINF2,C3,AHSG,SERPINA1,ORM2,SAA4,SERPINC1,ORM1,HP,ICAM1
GO:BP	positive regulation of gene expression	GO:0010628	2.51642e-06	5.59922	1160	217	40	18117	TFRC,XRCC5,GPI,GAPDH,HSPD1,HSP90AA1,FBLN1,ENO1,C5,HSPA8,HSPA1B,XRCC6,PKM,RBP4,APP,EEF2,SPTBN1,GSN,APOB,APOA2,FN1,SERPINF2,CALR,ACTG1,THBS1,C3,CLU,ORM2,ORM1,AGT,CADM1,SOD1,MIF,YBX1,HNRNPC,NPM1,NCL,PGC,LMNA,DKK1
GO:BP	chylomicron assembly	GO:0034378	2.63282e-06	5.57958	11	217	6	18117	P4HB,APOB,APOE,APOA2,APOA1,APOC3
GO:BP	response to decreased oxygen levels	GO:0036293	2.79595e-06	5.55347	382	217	22	18117	AHCY,PSMA7,PSMB6,HSPD1,PGK1,LDHA,ENO1,PSMA3,PSMA1,ACTN4,PKM,HSP90B1,PSMA5,P4HB,THBS1,VASN,PSME1,PSMB5,PSMA6,ICAM1,LMNA,PSMB4
GO:BP	glycolytic process through fructose-6-phosphate	GO:0061615	2.79841e-06	5.55309	29	217	8	18117	PGAM1,GPI,GAPDH,PGK1,ENO1,ALDOA,PKM,TPI1
GO:BP	antigen processing and presentation of exogenous peptide antigen via MHC class I, TAP-dependent	GO:0002479	3.07357e-06	5.51236	75	217	11	18117	PSMA7,PSMB6,PSMA3,PSMA1,PSMA5,CALR,PDIA3,PSME1,PSMB5,PSMA6,PSMB4
GO:BP	negative regulation of molecular function	GO:0044092	3.12878e-06	5.50462	1219	217	41	18117	GPI,GAPDH,C5,APP,YWHAE,TFPI,VTN,SET,GPC3,SERPINA7,SERPINA3,APOE,SERPIND1,APOA2,C4B,SERPINF2,ITIH2,THBS1,PROS1,C3,A2M,SERPINA5,APOA1,SERPINA6,AHSG,SERPINA1,AMBP,SERPINF1,ITIH3,APOC3,SERPINC1,PCSK9,AGT,HP,PEBP1,PRDX3,SERPINA11,APLP2,NPM1,SERPINA4,DKK1
GO:BP	cell differentiation	GO:0030154	3.36022e-06	5.47363	4350	217	92	18117	AGRN,TFRC,FASN,SPTAN1,AKR1C1,XRCC5,ATRN,PSMA7,PSMB6,HSP90AB1,NME2,HSP90AA1,KRT19,PGK1,FBLN1,HSPE1,PSMA3,PSMA1,CLIC1,HSPA1B,XRCC6,ACTN4,CLTC,FGA,PSMA5,APP,EEF2,YWHAZ,PSAP,VTN,P4HB,GPC3,SPTBN1,CDH2,GSN,FLNB,PTPRK,FGG,APOB,APOE,HSPA5,FN1,PROC,F2,SERPINF2,CALR,LAMC1,ACTG1,THBS1,C3,LRG1,A2M,SDC4,RELN,CLU,APOA1,DAG1,KRT10,SERPINF1,VASN,TF,PCSK9,AGT,KRT9,GOT1,PRDX3,CFL1,KRT8,PSME1,PSMB5,PSMA6,KRT18,ACTN…
GO:BP	small molecule biosynthetic process	GO:0044283	3.40577e-06	5.46779	704	217	30	18117	GLUD1,ACAT2,FASN,RAN,PGAM1,GPI,GAPDH,NME2,PGK1,TALDO1,ENO1,PSAT1,ALDOA,PKM,MDH1,TKT,TPI1,RBP4,APOB,APOE,APOA1,APOC3,PLTP,GOT1,MDH2,SOD1,MIF,UGDH,KPNB1,ACLY
GO:BP	inflammatory response	GO:0006954	3.6124e-06	5.4422	794	217	32	18117	AHCY,CTSC,ATRN,HSPD1,C5,PSMA1,APP,SERPINA3,APOE,C4B,FN1,PROC,F2,SERPINF2,THBS1,C3,APOA1,AHSG,SERPINA1,SERPINF1,ORM2,SAA4,SERPINC1,ORM1,AGT,HP,PSMA6,SOD1,MIF,SPP1,ICAM1,PSMB4
GO:BP	MAPK cascade	GO:0000165	3.94983e-06	5.40342	935	217	35	18117	SPTAN1,PSMA7,PSMB6,FBLN1,PSMA3,C5,PSMA1,PRDX1,FGA,PSMA5,APP,YWHAE,YWHAZ,SPTBN1,CDH2,FGG,APOE,FN1,SERPINF2,THBS1,DAG1,AMBP,TF,AGT,PEBP1,PSME1,PSMB5,PSMA6,SOD1,MIF,FGB,IGF2,ICAM1,PSMB4,DKK1
GO:BP	positive regulation of immune response	GO:0050778	4.0367e-06	5.39397	753	217	31	18117	TFRC,XRCC5,PSMA7,PSMB6,HSP90AB1,HSPD1,HSP90AA1,PSMA3,C5,PSMA1,XRCC6,PSMA5,VTN,CPN1,C4BPA,CFI,C4B,F2,ACTG1,PROS1,C3,A2M,CLU,C2,CPN2,PSME1,PSMB5,PSMA6,CADM1,PGC,PSMB4
GO:BP	protein folding	GO:0006457	4.08352e-06	5.38897	225	217	17	18117	HSP90AB1,HSPD1,HSP90AA1,HSPE1,PDIA4,HSPA8,HSPA1B,HSP90B1,P4HB,HSPA5,CALR,PDIA3,CLU,HSPA9,CCT8,CCT3,PRKCSH
GO:BP	positive regulation of biological process	GO:0048518	4.11372e-06	5.38577	6363	217	119	18117	AGRN,TFRC,GLUD1,FASN,RAN,CTSC,XRCC5,GPI,GAPDH,PSMA7,PSMB6,HSP90AB1,HSPD1,CLSTN1,NME2,CTSD,HSP90AA1,PGK1,LDHA,FBLN1,HSPE1,ENO1,PSMA3,C5,PSMA1,HSPA8,CLIC1,HSPA1B,XRCC6,ACTN4,PKM,FGA,NID1,PSMA5,RBP4,APP,YWHAE,EEF2,YWHAZ,VTN,CPN1,P4HB,GPC3,SPTBN1,CDH2,GSN,CLSTN3,F10,FGG,APOB,APOE,C4BPA,CFI,HSPA5,APOA2,C4B,FN1,PROC,F2,SERPINF2,CALR,LAMC1,ACTG1,PDIA3,THBS1,PROS1,C3,LRG1,A2M,SDC4,RELN,CLU,APOA1,C2,AHSG,…
GO:BP	regulation of response to wounding	GO:1903034	4.1735e-06	5.3795	169	217	15	18117	FGA,TFPI,VTN,FGG,APOE,PROC,F2,SERPINF2,ACTG1,THBS1,PROS1,SERPINC1,APOH,FGB,SPP1
GO:BP	regulation of apoptotic process	GO:0042981	4.49319e-06	5.34744	1549	217	47	18117	TFRC,CTSC,GPI,HSP90AB1,HSPD1,NME2,CTSD,HSP90AA1,LDHA,ENO1,HSPA1B,ACTN4,FGA,HSP90B1,YWHAE,YWHAZ,SET,P4HB,GSN,FGG,APOE,HSPA5,PROC,CALR,PDIA3,THBS1,CLU,ALB,APOH,PCSK9,AGT,PRDX3,CFL1,KRT18,ACTN1,HSPA9,SOD1,MIF,DHRS2,FGB,CRLF1,NPM1,ICAM1,CTSB,HNRNPK,LMNA,DKK1
GO:BP	cellular protein modification process	GO:0006464	5.41257e-06	5.2666	4041	217	87	18117	TFRC,UBA1,XRCC5,GAPDH,PSMA7,PSMB6,HSP90AB1,NME2,HSP90AA1,FBLN1,PDIA4,PSMA3,C5,PSMA1,HSPA1B,XRCC6,FGA,HSP90B1,PSMA5,APP,YWHAE,YWHAZ,VTN,SET,P4HB,GPC3,SPTBN1,CDH2,PTPRK,FGG,APOB,APOE,SERPIND1,HSPA5,APOA2,FN1,PROC,F2,LAMC1,PDIA3,ITIH2,THBS1,CPE,C3,SDC4,RELN,CLU,APOA1,AHSG,MATN3,DAG1,SERPINA1,KRT10,AMBP,AFP,NOTUM,SERPINC1,ALB,TF,PCSK9,AGT,F5,BPIFB2,CP,PRDX3,PSME1,PSMB5,PSMA6,ILF3,IGFBP1,SOD1,MIF,LAMB…
GO:BP	protein modification process	GO:0036211	5.41257e-06	5.2666	4041	217	87	18117	TFRC,UBA1,XRCC5,GAPDH,PSMA7,PSMB6,HSP90AB1,NME2,HSP90AA1,FBLN1,PDIA4,PSMA3,C5,PSMA1,HSPA1B,XRCC6,FGA,HSP90B1,PSMA5,APP,YWHAE,YWHAZ,VTN,SET,P4HB,GPC3,SPTBN1,CDH2,PTPRK,FGG,APOB,APOE,SERPIND1,HSPA5,APOA2,FN1,PROC,F2,LAMC1,PDIA3,ITIH2,THBS1,CPE,C3,SDC4,RELN,CLU,APOA1,AHSG,MATN3,DAG1,SERPINA1,KRT10,AMBP,AFP,NOTUM,SERPINC1,ALB,TF,PCSK9,AGT,F5,BPIFB2,CP,PRDX3,PSME1,PSMB5,PSMA6,ILF3,IGFBP1,SOD1,MIF,LAMB…
GO:BP	regulation of multicellular organismal process	GO:0051239	6.07991e-06	5.2161	2861	217	69	18117	AGRN,TFRC,CTSC,ALDH1A1,XRCC5,GPI,ATRN,GAPDH,HSP90AB1,HSPD1,CLSTN1,NME2,HSP90AA1,PGK1,FBLN1,ENO1,C5,HSPA1B,XRCC6,PKM,FGA,RBP4,APP,YWHAE,TFPI,VTN,SPTBN1,CLSTN3,FGG,APOE,APOM,APOA2,FN1,PROC,F2,SERPINF2,CALR,THBS1,PROS1,C3,LRG1,RELN,CLU,APOA1,AHSG,DAG1,SERPINF1,APOC3,ORM2,SERPINC1,VASN,ORM1,APOH,TF,PCSK9,AGT,CFL1,CADM1,HSPA9,SOD1,MIF,FGB,IGF2,SPP1,ICAM1,HNRNPK,LMNA,FH,DKK1
GO:BP	terpenoid metabolic process	GO:0006721	6.10495e-06	5.21432	123	217	13	18117	AGRN,ALDH1A1,AKR1C1,RBP4,GPC3,TTR,APOB,APOE,APOM,APOA2,SDC4,APOA1,APOC3
GO:BP	antigen processing and presentation of exogenous peptide antigen via MHC class I	GO:0042590	6.23941e-06	5.20486	80	217	11	18117	PSMA7,PSMB6,PSMA3,PSMA1,PSMA5,CALR,PDIA3,PSME1,PSMB5,PSMA6,PSMB4
GO:BP	regulation of body fluid levels	GO:0050878	6.42426e-06	5.19218	514	217	25	18117	GPI,FBLN1,CLIC1,FGA,TFPI,YWHAZ,VTN,F10,FGG,APOE,SERPIND1,FN1,PROC,F2,SERPINF2,ACTG1,THBS1,PROS1,A2M,SERPINA5,SERPINA1,SERPINC1,APOH,F5,FGB
GO:BP	regulation of biological process	GO:0050789	6.9889e-06	5.15559	12091	217	183	18117	AGRN,TFRC,GLUD1,FASN,RAN,PGAM1,CTSC,SPTAN1,RPSA,ALDH1A1,XRCC5,GPI,ATRN,GAPDH,PSMA7,PSMB6,HSP90AB1,HSPD1,CLSTN1,NME2,IDH1,CTSD,HSP90AA1,KRT19,PGK1,LDHA,FBLN1,HSPE1,TALDO1,RPLP2,GSR,PDIA4,ENO1,PSMA3,C5,PSMA1,HSPA8,CLIC1,PRDX1,ALDOA,HSPA1B,XRCC6,ACTN4,CLTC,TUBB4B,PKM,FGA,HSP90B1,NID1,PSMA5,TKT,RBP4,APP,TUBB,YWHAE,TFPI,EEF2,YWHAZ,PSAP,VTN,CPN1,SET,P4HB,GPC3,SERPINA7,SPTBN1,CDH2,GSN,CLSTN3,FLNB,PTPRK,…
GO:BP	receptor-mediated endocytosis	GO:0006898	8.02753e-06	5.09542	333	217	20	18117	TFRC,HSP90AA1,CLTC,HSP90B1,VTN,APOB,APOE,CALR,C3,CLU,APOA1,AMBP,APOC3,ALB,TF,PCSK9,HP,CAP1,HNRNPK,DKK1
GO:BP	regulation of programmed cell death	GO:0043067	8.83481e-06	5.0538	1582	217	47	18117	TFRC,CTSC,GPI,HSP90AB1,HSPD1,NME2,CTSD,HSP90AA1,LDHA,ENO1,HSPA1B,ACTN4,FGA,HSP90B1,YWHAE,YWHAZ,SET,P4HB,GSN,FGG,APOE,HSPA5,PROC,CALR,PDIA3,THBS1,CLU,ALB,APOH,PCSK9,AGT,PRDX3,CFL1,KRT18,ACTN1,HSPA9,SOD1,MIF,DHRS2,FGB,CRLF1,NPM1,ICAM1,CTSB,HNRNPK,LMNA,DKK1
GO:BP	response to oxygen levels	GO:0070482	9.43496e-06	5.02526	408	217	22	18117	AHCY,PSMA7,PSMB6,HSPD1,PGK1,LDHA,ENO1,PSMA3,PSMA1,ACTN4,PKM,HSP90B1,PSMA5,P4HB,THBS1,VASN,PSME1,PSMB5,PSMA6,ICAM1,LMNA,PSMB4
GO:BP	negative regulation of apoptotic process	GO:0043066	9.88516e-06	5.00502	921	217	34	18117	TFRC,GPI,HSP90AB1,HSPD1,NME2,ENO1,HSPA1B,FGA,HSP90B1,YWHAE,YWHAZ,SET,FGG,APOE,HSPA5,PROC,THBS1,CLU,ALB,APOH,PRDX3,CFL1,KRT18,HSPA9,SOD1,MIF,DHRS2,FGB,CRLF1,NPM1,ICAM1,HNRNPK,LMNA,DKK1
GO:BP	defense response to other organism	GO:0098542	1.01707e-05	4.99265	1218	217	40	18117	XRCC5,GAPDH,PSMA7,PSMB6,HSP90AB1,HSP90AA1,PSMA3,C5,PSMA1,PRDX1,XRCC6,TUBB4B,FGA,PSMA5,APP,TUBB,GSN,APOE,C4BPA,CFI,C4B,F2,ACTG1,C3,A2M,RNASET2,CLU,C2,TF,HP,PSME1,PSMB5,PSMA6,ILF3,CADM1,MIF,FGB,ICAM1,PGC,PSMB4
GO:BP	organic cyclic compound catabolic process	GO:1901361	1.03061e-05	4.98691	651	217	28	18117	AHCY,RPSA,PSMA7,PSMB6,QPRT,RPLP2,PSMA3,PSMA1,HSPA8,HSPA1B,PSMA5,YWHAZ,SET,APOE,RNASET2,AMBP,PSME1,PSMB5,PSMA6,SSB,RPLP0,RPL12,YBX1,KPNB1,HNRNPC,SPP1,NPM1,PSMB4
GO:BP	cellular response to stress	GO:0033554	1.2224e-05	4.91279	2111	217	56	18117	UBA1,XRCC5,PSMA7,PSMB6,HSP90AB1,HSPD1,NME2,HSP90AA1,PGK1,GSR,PDIA4,ENO1,PSMA3,PSMA1,HSPA8,PRDX1,HSPA1B,XRCC6,HSP90B1,PSMA5,APP,YWHAE,EEF2,P4HB,PTPRK,HSPA5,SERPINF2,CALR,PDIA3,THBS1,CLU,APOA1,DAG1,AMBP,ALB,VASN,TF,PCSK9,AGT,PRDX3,PSME1,PSMB5,PSMA6,HSPA9,IGFBP1,SOD1,MIF,DHRS2,YBX1,SPP1,NPM1,ICAM1,HNRNPK,LMNA,PSMB4,FH
GO:BP	response to inorganic substance	GO:0010035	1.38159e-05	4.85962	575	217	26	18117	GPI,HSPD1,LDHA,ATIC,PRDX1,GGH,FGA,APP,EEF2,GSN,FGG,APOB,HSPA5,CALR,ACTG1,THBS1,SERPINF1,TF,HP,GOT1,PRDX3,KRT8,SOD1,CUTA,FGB,ICAM1
GO:BP	regulation of cell death	GO:0010941	1.50483e-05	4.82251	1720	217	49	18117	TFRC,CTSC,GPI,HSP90AB1,HSPD1,NME2,CTSD,HSP90AA1,LDHA,ENO1,HSPA1B,ACTN4,FGA,HSP90B1,YWHAE,YWHAZ,SET,P4HB,GSN,FGG,APOE,HSPA5,PROC,CALR,PDIA3,THBS1,CLU,SERPINF1,ALB,APOH,PCSK9,AGT,HP,PRDX3,CFL1,KRT18,ACTN1,HSPA9,SOD1,MIF,DHRS2,FGB,CRLF1,NPM1,ICAM1,CTSB,HNRNPK,LMNA,DKK1
GO:BP	substrate adhesion-dependent cell spreading	GO:0034446	1.57965e-05	4.80144	109	217	12	18117	ATRN,FBLN1,ACTN4,FGA,P4HB,FGG,FN1,CALR,LAMC1,APOA1,LAMB1,FGB
GO:BP	negative regulation of canonical Wnt signaling pathway	GO:0090090	1.67886e-05	4.77499	187	217	15	18117	PSMA7,PSMB6,PSMA3,PSMA1,PSMA5,GPC3,CDH2,APOE,NOTUM,PSME1,PSMB5,PSMA6,IGFBP1,PSMB4,DKK1
GO:BP	mRNA catabolic process	GO:0006402	1.68971e-05	4.77219	384	217	21	18117	RPSA,PSMA7,PSMB6,RPLP2,PSMA3,PSMA1,HSPA8,HSPA1B,PSMA5,YWHAZ,SET,PSME1,PSMB5,PSMA6,SSB,RPLP0,RPL12,YBX1,HNRNPC,NPM1,PSMB4
GO:BP	Wnt signaling pathway, planar cell polarity pathway	GO:0060071	1.75458e-05	4.75583	110	217	12	18117	PSMA7,PSMB6,PSMA3,PSMA1,CLTC,PSMA5,GPC3,PSME1,PSMB5,PSMA6,PSMB4,DKK1
GO:BP	negative regulation of programmed cell death	GO:0043069	1.78535e-05	4.74828	943	217	34	18117	TFRC,GPI,HSP90AB1,HSPD1,NME2,ENO1,HSPA1B,FGA,HSP90B1,YWHAE,YWHAZ,SET,FGG,APOE,HSPA5,PROC,THBS1,CLU,ALB,APOH,PRDX3,CFL1,KRT18,HSPA9,SOD1,MIF,DHRS2,FGB,CRLF1,NPM1,ICAM1,HNRNPK,LMNA,DKK1
GO:BP	regulation of immune effector process	GO:0002697	1.78939e-05	4.74729	461	217	23	18117	TFRC,GPI,HSPD1,HSP90AA1,C5,RBP4,VTN,CPN1,C4BPA,CFI,APOA2,C4B,F2,PROS1,C3,A2M,CLU,APOA1,C2,CPN2,CADM1,ICAM1,PGC
GO:BP	glucose catabolic process	GO:0006007	1.8358e-05	4.73618	36	217	8	18117	PGAM1,GPI,GAPDH,PGK1,ENO1,ALDOA,PKM,TPI1
GO:BP	RNA catabolic process	GO:0006401	1.90128e-05	4.72095	424	217	22	18117	RPSA,PSMA7,PSMB6,RPLP2,PSMA3,PSMA1,HSPA8,HSPA1B,PSMA5,YWHAZ,SET,RNASET2,PSME1,PSMB5,PSMA6,SSB,RPLP0,RPL12,YBX1,HNRNPC,NPM1,PSMB4
GO:BP	negative regulation of response to stimulus	GO:0048585	1.92189e-05	4.71627	1733	217	49	18117	PSMA7,PSMB6,FBLN1,ENO1,PSMA3,C5,PSMA1,HSPA1B,FGA,PSMA5,TFPI,VTN,GPC3,CDH2,FGG,APOE,C4BPA,HSPA5,PROC,F2,SERPINF2,CALR,THBS1,PROS1,A2M,CLU,APOA1,AHSG,DAG1,AMBP,SERPINF1,NOTUM,VASN,APOH,AGT,PEBP1,PSME1,PSMB5,PSMA6,IGFBP1,SOD1,MIF,FGB,YBX1,SPP1,ICAM1,LMNA,PSMB4,DKK1
GO:BP	hematopoietic stem cell differentiation	GO:0060218	1.97929e-05	4.70349	89	217	11	18117	XRCC5,PSMA7,PSMB6,PSMA3,PSMA1,PSMA5,PSME1,PSMB5,PSMA6,HSPA9,PSMB4
GO:BP	gluconeogenesis	GO:0006094	1.97929e-05	4.70349	89	217	11	18117	PGAM1,GPI,GAPDH,PGK1,ENO1,ALDOA,MDH1,TPI1,RBP4,GOT1,MDH2
GO:BP	regulation of immune response	GO:0050776	2.00968e-05	4.69687	996	217	35	18117	TFRC,XRCC5,PSMA7,PSMB6,HSP90AB1,HSPD1,HSP90AA1,PSMA3,C5,PSMA1,XRCC6,PSMA5,VTN,CPN1,APOE,C4BPA,CFI,C4B,F2,ACTG1,PROS1,C3,A2M,CLU,C2,CPN2,AMBP,PSME1,PSMB5,PSMA6,FGL1,CADM1,ICAM1,PGC,PSMB4
GO:BP	programmed cell death	GO:0012501	2.09683e-05	4.67844	2143	217	56	18117	TFRC,CTSC,GPI,GAPDH,HSP90AB1,HSPD1,NME2,CTSD,HSP90AA1,KRT19,LDHA,ENO1,HSPA1B,ACTN4,PKM,FGA,HSP90B1,APP,YWHAE,YWHAZ,SET,P4HB,GSN,FGG,APOE,HSPA5,PROC,CALR,PDIA3,THBS1,CLU,KRT10,ALB,APOH,PCSK9,AGT,KRT9,PRDX3,CFL1,KRT8,KRT18,ACTN1,CADM1,HSPA9,SOD1,MIF,DHRS2,FGB,CRLF1,KPNB1,NPM1,ICAM1,CTSB,HNRNPK,LMNA,DKK1
GO:BP	innate immune response	GO:0045087	2.11466e-05	4.67476	998	217	35	18117	XRCC5,GAPDH,PSMA7,PSMB6,HSP90AB1,HSP90AA1,PSMA3,C5,PSMA1,PRDX1,XRCC6,TUBB4B,FGA,PSMA5,APP,TUBB,GSN,APOE,C4BPA,CFI,C4B,ACTG1,C3,A2M,RNASET2,CLU,C2,PSME1,PSMB5,PSMA6,CADM1,MIF,FGB,ICAM1,PSMB4
GO:BP	regulation of mRNA stability	GO:0043488	2.23865e-05	4.65001	191	217	15	18117	PSMA7,PSMB6,PSMA3,PSMA1,HSPA8,PSMA5,YWHAZ,SET,PSME1,PSMB5,PSMA6,YBX1,HNRNPC,NPM1,PSMB4
GO:BP	regulation of establishment of planar polarity	GO:0090175	2.64191e-05	4.57808	114	217	12	18117	PSMA7,PSMB6,PSMA3,PSMA1,CLTC,PSMA5,GPC3,PSME1,PSMB5,PSMA6,PSMB4,DKK1
GO:BP	hexose biosynthetic process	GO:0019319	2.82324e-05	4.54925	92	217	11	18117	PGAM1,GPI,GAPDH,PGK1,ENO1,ALDOA,MDH1,TPI1,RBP4,GOT1,MDH2
GO:BP	positive regulation of response to external stimulus	GO:0032103	2.88309e-05	4.54014	513	217	24	18117	CTSC,XRCC5,PSMA7,PSMB6,HSPD1,HSP90AA1,PSMA3,PSMA1,XRCC6,PSMA5,APP,F2,SERPINF2,CALR,THBS1,C3,APOH,AGT,PSME1,PSMB5,PSMA6,CADM1,PGC,PSMB4
GO:BP	positive regulation of response to stimulus	GO:0048584	2.93251e-05	4.53276	2344	217	59	18117	TFRC,CTSC,XRCC5,PSMA7,PSMB6,HSP90AB1,HSPD1,HSP90AA1,PSMA3,C5,PSMA1,HSPA1B,XRCC6,ACTN4,FGA,PSMA5,APP,VTN,CPN1,GPC3,CDH2,F10,FGG,APOE,C4BPA,CFI,C4B,FN1,F2,SERPINF2,CALR,ACTG1,PDIA3,THBS1,PROS1,C3,LRG1,A2M,RELN,CLU,APOA1,C2,CPN2,APOH,TF,AGT,GOT1,PSME1,PSMB5,PSMA6,CADM1,SOD1,MIF,FGB,IGF2,ICAM1,PGC,PSMB4,DKK1
GO:BP	macromolecule modification	GO:0043412	3.24925e-05	4.48822	4257	217	88	18117	TFRC,UBA1,XRCC5,GAPDH,PSMA7,PSMB6,HSP90AB1,NME2,HSP90AA1,FBLN1,PDIA4,PSMA3,C5,PSMA1,HSPA1B,XRCC6,FGA,HSP90B1,PSMA5,APP,YWHAE,YWHAZ,VTN,SET,P4HB,GPC3,SPTBN1,CDH2,PTPRK,FGG,APOB,APOE,SERPIND1,HSPA5,APOA2,FN1,PROC,F2,LAMC1,PDIA3,ITIH2,THBS1,CPE,C3,SDC4,RELN,CLU,APOA1,AHSG,MATN3,DAG1,SERPINA1,KRT10,AMBP,AFP,NOTUM,SERPINC1,ALB,TF,PCSK9,AGT,F5,BPIFB2,CP,PRDX3,PSME1,PSMB5,PSMA6,SSB,ILF3,IGFBP1,SOD1,MIF,…
GO:BP	cell death	GO:0008219	3.36264e-05	4.47332	2292	217	58	18117	TFRC,CTSC,GPI,GAPDH,HSP90AB1,HSPD1,NME2,CTSD,HSP90AA1,KRT19,LDHA,ENO1,HSPA1B,ACTN4,PKM,FGA,HSP90B1,APP,YWHAE,YWHAZ,SET,P4HB,GSN,FGG,APOE,HSPA5,PROC,CALR,PDIA3,THBS1,CLU,KRT10,SERPINF1,ALB,APOH,PCSK9,AGT,KRT9,HP,PRDX3,CFL1,KRT8,KRT18,ACTN1,CADM1,HSPA9,SOD1,MIF,DHRS2,FGB,CRLF1,KPNB1,NPM1,ICAM1,CTSB,HNRNPK,LMNA,DKK1
GO:BP	heterocycle catabolic process	GO:0046700	3.52867e-05	4.45239	602	217	26	18117	AHCY,RPSA,PSMA7,PSMB6,QPRT,RPLP2,PSMA3,PSMA1,HSPA8,HSPA1B,PSMA5,YWHAZ,SET,RNASET2,AMBP,PSME1,PSMB5,PSMA6,SSB,RPLP0,RPL12,YBX1,KPNB1,HNRNPC,NPM1,PSMB4
GO:BP	extracellular matrix organization	GO:0030198	3.59604e-05	4.44418	401	217	21	18117	AGRN,FBLN1,FGA,NID1,APP,VTN,FGG,TTR,FN1,SERPINF2,LAMC1,THBS1,A2M,MATN3,DAG1,AGT,LAMB1,FGB,SPP1,ICAM1,VCAN
GO:BP	positive regulation of transport	GO:0051050	3.73593e-05	4.4276	923	217	33	18117	GLUD1,RAN,HSP90AB1,ACTN4,FGA,RBP4,YWHAE,YWHAZ,VTN,GPC3,CDH2,FGG,APOE,APOA2,C4B,F2,CALR,C3,SDC4,RELN,CLU,APOA1,C2,AHSG,TF,PCSK9,AGT,PLTP,SOD1,DPYSL2,FGB,SPP1,HNRNPK
GO:BP	extracellular structure organization	GO:0043062	3.75462e-05	4.42543	402	217	21	18117	AGRN,FBLN1,FGA,NID1,APP,VTN,FGG,TTR,FN1,SERPINF2,LAMC1,THBS1,A2M,MATN3,DAG1,AGT,LAMB1,FGB,SPP1,ICAM1,VCAN
GO:BP	external encapsulating structure organization	GO:0045229	4.09139e-05	4.38813	404	217	21	18117	AGRN,FBLN1,FGA,NID1,APP,VTN,FGG,TTR,FN1,SERPINF2,LAMC1,THBS1,A2M,MATN3,DAG1,AGT,LAMB1,FGB,SPP1,ICAM1,VCAN
GO:BP	cell-substrate adhesion	GO:0031589	4.14702e-05	4.38226	367	217	20	18117	ATRN,FBLN1,ACTN4,FGA,NID1,VTN,P4HB,PTPRK,FGG,FN1,CALR,LAMC1,ACTG1,THBS1,SDC4,APOA1,DAG1,ACTN1,LAMB1,FGB
GO:BP	regulation of response to stimulus	GO:0048583	4.15521e-05	4.38141	4278	217	88	18117	TFRC,CTSC,XRCC5,PSMA7,PSMB6,HSP90AB1,HSPD1,HSP90AA1,FBLN1,ENO1,PSMA3,C5,PSMA1,HSPA8,PRDX1,HSPA1B,XRCC6,ACTN4,FGA,PSMA5,APP,YWHAE,TFPI,YWHAZ,VTN,CPN1,P4HB,GPC3,SPTBN1,CDH2,F10,FGG,APOE,C4BPA,CFI,HSPA5,C4B,FN1,PROC,F2,SERPINF2,CALR,ACTG1,PDIA3,THBS1,PROS1,C3,LRG1,A2M,RELN,CLU,APOA1,C2,AHSG,DAG1,CPN2,AMBP,SERPINF1,APOC3,NOTUM,SERPINC1,VASN,APOH,TF,PCSK9,AGT,GOT1,PEBP1,PSME1,PSMB5,PSMA6,FGL1,CADM1,IG…
GO:BP	isoprenoid metabolic process	GO:0006720	4.19436e-05	4.37733	144	217	13	18117	AGRN,ALDH1A1,AKR1C1,RBP4,GPC3,TTR,APOB,APOE,APOM,APOA2,SDC4,APOA1,APOC3
GO:BP	cellular nitrogen compound catabolic process	GO:0044270	4.31316e-05	4.3652	608	217	26	18117	AHCY,RPSA,PSMA7,PSMB6,QPRT,RPLP2,PSMA3,PSMA1,HSPA8,HSPA1B,PSMA5,YWHAZ,SET,RNASET2,AMBP,PSME1,PSMB5,PSMA6,SSB,RPLP0,RPL12,YBX1,KPNB1,HNRNPC,NPM1,PSMB4
GO:BP	biological adhesion	GO:0022610	4.4454e-05	4.35209	1499	217	44	18117	TFRC,RPSA,ATRN,HSP90AB1,HSPD1,CLSTN1,NME2,FBLN1,CLIC1,ACTN4,FGA,NID1,APP,VTN,P4HB,CDH2,GSN,CLSTN3,PTPRK,FGG,FN1,SERPINF2,CALR,LAMC1,ACTG1,THBS1,LGALS3BP,SDC4,RELN,APOA1,DAG1,AMBP,AZGP1,KRT18,ACTN1,FGL1,CADM1,LAMB1,FGB,ALCAM,IGF2,SPP1,ICAM1,VCAN
GO:BP	negative regulation of response to external stimulus	GO:0032102	4.45595e-05	4.35106	406	217	21	18117	C5,PSMA1,FGA,TFPI,VTN,FGG,APOE,PROC,F2,SERPINF2,THBS1,PROS1,A2M,APOA1,SERPINF1,APOH,SOD1,MIF,FGB,SPP1,PSMB4
GO:BP	regulation of RNA stability	GO:0043487	4.45871e-05	4.35079	201	217	15	18117	PSMA7,PSMB6,PSMA3,PSMA1,HSPA8,PSMA5,YWHAZ,SET,PSME1,PSMB5,PSMA6,YBX1,HNRNPC,NPM1,PSMB4
GO:BP	biological regulation	GO:0065007	4.50232e-05	4.34656	12809	217	188	18117	AGRN,TFRC,GLUD1,FASN,RAN,PGAM1,CTSC,SPTAN1,RPSA,ALDH1A1,AKR1C1,XRCC5,GPI,ATRN,GAPDH,PSMA7,PSMB6,HSP90AB1,HSPD1,CLSTN1,NME2,IDH1,CTSD,HSP90AA1,KRT19,PGK1,LDHA,FBLN1,HSPE1,TALDO1,RPLP2,GSR,PDIA4,ENO1,PSMA3,C5,PSMA1,HSPA8,CLIC1,PRDX1,ALDOA,HSPA1B,XRCC6,ACTN4,CLTC,TUBB4B,PKM,FGA,HSP90B1,NID1,PSMA5,TKT,RBP4,APP,TUBB,YWHAE,TFPI,EEF2,YWHAZ,PSAP,VTN,CPN1,SET,P4HB,GPC3,SERPINA7,SPTBN1,CDH2,GSN,CLSTN3,FLNB…
GO:BP	regulation of hematopoietic stem cell differentiation	GO:1902036	4.51477e-05	4.34536	75	217	10	18117	PSMA7,PSMB6,PSMA3,PSMA1,PSMA5,PSME1,PSMB5,PSMA6,HSPA9,PSMB4
GO:BP	macromolecule metabolic process	GO:0043170	4.56578e-05	4.34048	9796	217	157	18117	AGRN,TFRC,RAN,UBA1,PGAM1,CTSC,RPSA,XRCC5,GPI,GAPDH,PSMA7,PSMB6,HSP90AB1,HSPD1,EEF1G,NME2,CTSD,HSP90AA1,PGK1,FBLN1,HSPE1,RPLP2,PDIA4,ENO1,PSMA3,C5,PSMA1,HSPA8,HSPA1B,XRCC6,ACTN4,GGH,CLTC,PKM,FGA,HSP90B1,PSMA5,RBP4,APP,YWHAE,TFPI,EEF2,YWHAZ,VTN,CPN1,SET,P4HB,GPC3,SERPINA7,SPTBN1,CDH2,GSN,PTPRK,F10,SERPINA3,FGG,TTR,APOB,APOE,APOM,C4BPA,CFI,SERPIND1,HSPA5,APOA2,C4B,FN1,PROC,F2,SERPINF2,CALR,LAMC1,ACT…
GO:BP	hexose catabolic process	GO:0019320	5.1074e-05	4.2918	57	217	9	18117	PGAM1,ALDH1A1,GPI,GAPDH,PGK1,ENO1,ALDOA,PKM,TPI1
GO:BP	antigen processing and presentation	GO:0019882	5.14099e-05	4.28895	234	217	16	18117	PSMA7,PSMB6,CTSD,PSMA3,PSMA1,CLTC,PSMA5,CALR,PDIA3,THBS1,AZGP1,PSME1,PSMB5,PSMA6,ICAM1,PSMB4
GO:BP	positive regulation of multicellular organismal process	GO:0051240	5.48451e-05	4.26086	1455	217	43	18117	AGRN,TFRC,XRCC5,GAPDH,HSPD1,CLSTN1,NME2,HSP90AA1,ENO1,C5,HSPA1B,XRCC6,PKM,FGA,APP,SPTBN1,CLSTN3,FGG,APOE,APOA2,FN1,F2,SERPINF2,THBS1,C3,LRG1,RELN,CLU,DAG1,SERPINF1,ORM2,ORM1,APOH,AGT,CFL1,CADM1,SOD1,MIF,FGB,IGF2,ICAM1,FH,DKK1
GO:BP	negative regulation of cell death	GO:0060548	5.68067e-05	4.2456	1038	217	35	18117	TFRC,GPI,HSP90AB1,HSPD1,NME2,ENO1,HSPA1B,FGA,HSP90B1,YWHAE,YWHAZ,SET,FGG,APOE,HSPA5,PROC,THBS1,CLU,SERPINF1,ALB,APOH,PRDX3,CFL1,KRT18,HSPA9,SOD1,MIF,DHRS2,FGB,CRLF1,NPM1,ICAM1,HNRNPK,LMNA,DKK1
GO:BP	response to topologically incorrect protein	GO:0035966	5.80683e-05	4.23606	205	217	15	18117	HSPA4,HSP90AB1,HSPD1,HSP90AA1,HSPE1,HSPA8,HSPA1B,HSP90B1,HSPA5,CALR,THBS1,CLU,HSPA9,IGFBP1,LMNA
GO:BP	zymogen activation	GO:0031638	5.98317e-05	4.22307	58	217	9	18117	PGK1,ENO1,FGA,FGG,SERPINF2,THBS1,APOH,HP,FGB
GO:BP	antigen processing and presentation of peptide antigen via MHC class I	GO:0002474	6.15317e-05	4.2109	99	217	11	18117	PSMA7,PSMB6,PSMA3,PSMA1,PSMA5,CALR,PDIA3,PSME1,PSMB5,PSMA6,PSMB4
GO:BP	chylomicron remodeling	GO:0034371	6.20218e-05	4.20746	9	217	5	18117	APOB,APOE,APOA2,APOA1,APOC3
GO:BP	tumor necrosis factor-mediated signaling pathway	GO:0033209	6.42413e-05	4.19219	177	217	14	18117	PSMA7,PSMB6,PSMA3,PSMA1,HSPA1B,ACTN4,PSMA5,APOA1,KRT8,PSME1,PSMB5,PSMA6,KRT18,PSMB4
GO:BP	macromolecule catabolic process	GO:0009057	7.08817e-05	4.14947	1468	217	43	18117	AGRN,UBA1,CTSC,RPSA,PSMA7,PSMB6,HSP90AB1,CTSD,HSP90AA1,RPLP2,PSMA3,PSMA1,HSPA8,HSPA1B,CLTC,HSP90B1,PSMA5,YWHAZ,SET,GPC3,APOB,APOE,C4BPA,HSPA5,SDC4,RNASET2,CLU,AMBP,NOTUM,PCSK9,PSME1,PSMB5,PSMA6,SSB,RPLP0,RPL12,YBX1,KPNB1,HNRNPC,NPM1,CTSB,PSMB4,VCAN
GO:BP	morphogenesis of a polarized epithelium	GO:0001738	8.02679e-05	4.09546	152	217	13	18117	PSMA7,PSMB6,PSMA3,PSMA1,CLTC,PSMA5,GPC3,ACTG1,PSME1,PSMB5,PSMA6,PSMB4,DKK1
GO:BP	tissue development	GO:0009888	8.16487e-05	4.08805	2107	217	54	18117	AGRN,FASN,AKR1C1,GPI,ATRN,PSMA7,PSMB6,NME2,KRT19,PGK1,PSMA3,PSMA1,CLTC,PKM,PSMA5,RBP4,EEF2,PSAP,VTN,GPC3,CDH2,GSN,FN1,PROC,CALR,LAMC1,ACTG1,C3,SDC4,AHSG,MATN3,DAG1,KRT10,VASN,AGT,KRT9,KRT8,PSME1,PSMB5,PSMA6,KRT18,IGFBP1,SOD1,LAMB1,YBX1,CRLF1,IGF2,SPP1,ICAM1,CTSB,LARGE1,LMNA,PSMB4,DKK1
GO:BP	cytokine-mediated signaling pathway	GO:0019221	8.29864e-05	4.08099	810	217	30	18117	PSMA7,PSMB6,HSP90AB1,HSP90AA1,TALDO1,PSMA3,PSMA1,HSPA8,HSPA1B,ACTN4,HSP90B1,PSMA5,YWHAZ,P4HB,FN1,APOA1,CFL1,KRT8,PSME1,PSMB5,PSMA6,KRT18,RPLP0,HSPA9,SOD1,MIF,CRLF1,ICAM1,LMNB1,PSMB4
GO:BP	apoptotic process	GO:0006915	8.40574e-05	4.07542	1990	217	52	18117	TFRC,CTSC,GPI,GAPDH,HSP90AB1,HSPD1,NME2,CTSD,HSP90AA1,LDHA,ENO1,HSPA1B,ACTN4,FGA,HSP90B1,APP,YWHAE,YWHAZ,SET,P4HB,GSN,FGG,APOE,HSPA5,PROC,CALR,PDIA3,THBS1,CLU,ALB,APOH,PCSK9,AGT,PRDX3,CFL1,KRT8,KRT18,ACTN1,CADM1,HSPA9,SOD1,MIF,DHRS2,FGB,CRLF1,KPNB1,NPM1,ICAM1,CTSB,HNRNPK,LMNA,DKK1
GO:BP	monosaccharide metabolic process	GO:0005996	8.64964e-05	4.063	276	217	17	18117	PGAM1,ALDH1A1,GPI,GAPDH,PGK1,TALDO1,ENO1,ALDOA,PKM,MDH1,TKT,TPI1,RBP4,GOT1,MDH2,IGF2,FUCA2
GO:BP	humoral immune response	GO:0006959	8.78514e-05	4.05625	384	217	20	18117	GPI,GAPDH,C5,FGA,VTN,CPN1,C4BPA,CFI,C4B,F2,PROS1,C3,A2M,CLU,C2,CPN2,TF,BPIFB2,FGB,PGC
GO:BP	cellular response to hypoxia	GO:0071456	9.08599e-05	4.04163	212	217	15	18117	PSMA7,PSMB6,PGK1,ENO1,PSMA3,PSMA1,PSMA5,P4HB,VASN,PSME1,PSMB5,PSMA6,ICAM1,LMNA,PSMB4
GO:BP	regulation of mRNA catabolic process	GO:0061013	9.67197e-05	4.01449	213	217	15	18117	PSMA7,PSMB6,PSMA3,PSMA1,HSPA8,PSMA5,YWHAZ,SET,PSME1,PSMB5,PSMA6,YBX1,HNRNPC,NPM1,PSMB4
GO:BP	carbohydrate biosynthetic process	GO:0016051	0.000102921	3.9875	214	217	15	18117	PGAM1,GPI,GAPDH,PGK1,TALDO1,ENO1,ALDOA,CLTC,MDH1,TKT,TPI1,RBP4,GOT1,MDH2,IGF2
GO:BP	response to unfolded protein	GO:0006986	0.000104858	3.9794	184	217	14	18117	HSPA4,HSP90AB1,HSPD1,HSP90AA1,HSPE1,HSPA8,HSPA1B,HSP90B1,HSPA5,CALR,THBS1,HSPA9,IGFBP1,LMNA
GO:BP	regulation of localization	GO:0032879	0.000108463	3.96472	2872	217	66	18117	TFRC,GLUD1,RAN,GPI,HSP90AB1,CTSD,HSP90AA1,FBLN1,C5,HSPA8,CLIC1,ACTN4,CLTC,FGA,RBP4,APP,YWHAE,YWHAZ,VTN,GPC3,SPTBN1,CDH2,GSN,CLSTN3,PTPRK,F10,FGG,APOB,APOE,HSPA5,APOA2,C4B,FN1,F2,CALR,ACTG1,THBS1,C3,SDC4,RELN,CLU,APOA1,C2,AHSG,DAG1,SERPINF1,APOC3,APOH,TF,PCSK9,AGT,PLTP,ACTN1,SOD1,MIF,LAMB1,DPYSL2,FGB,CCT8,CCT3,SPP1,ICAM1,HNRNPK,NUCB1,LMNA,DKK1
GO:BP	cell adhesion	GO:0007155	0.000112761	3.94784	1492	217	43	18117	TFRC,RPSA,ATRN,HSPD1,CLSTN1,NME2,FBLN1,CLIC1,ACTN4,FGA,NID1,APP,VTN,P4HB,CDH2,GSN,CLSTN3,PTPRK,FGG,FN1,SERPINF2,CALR,LAMC1,ACTG1,THBS1,LGALS3BP,SDC4,RELN,APOA1,DAG1,AMBP,AZGP1,KRT18,ACTN1,FGL1,CADM1,LAMB1,FGB,ALCAM,IGF2,SPP1,ICAM1,VCAN
GO:BP	animal organ development	GO:0048513	0.000115189	3.93859	3672	217	78	18117	AGRN,TFRC,GLUD1,FASN,XRCC5,ATRN,PSMA7,PSMB6,HSP90AB1,NME2,IDH1,KRT19,LDHA,ATIC,PSMA3,PSMA1,HSPA1B,XRCC6,CLTC,PKM,NID1,PSMA5,RBP4,APP,YWHAE,EEF2,YWHAZ,PSAP,GPC3,CDH2,FLNB,PTPRK,HSPA5,FN1,CALR,LAMC1,THBS1,CPE,SERPINA5,SDC4,RELN,APOA1,AHSG,MATN3,DAG1,KRT10,SERPINF1,AFP,SERPINC1,VASN,TF,PCSK9,AGT,KRT9,PRDX3,KRT8,PSME1,PSMB5,PSMA6,KRT18,ACTN1,FGL1,HSPA9,SOD1,LAMB1,DPYSL2,DHRS2,CRLF1,PRKCSH,IGF2,NASP,S…
GO:BP	establishment of planar polarity	GO:0001736	0.000116562	3.93344	130	217	12	18117	PSMA7,PSMB6,PSMA3,PSMA1,CLTC,PSMA5,GPC3,PSME1,PSMB5,PSMA6,PSMB4,DKK1
GO:BP	establishment of tissue polarity	GO:0007164	0.000116562	3.93344	130	217	12	18117	PSMA7,PSMB6,PSMA3,PSMA1,CLTC,PSMA5,GPC3,PSME1,PSMB5,PSMA6,PSMB4,DKK1
GO:BP	positive regulation of cell communication	GO:0010647	0.000118474	3.92638	1777	217	48	18117	TFRC,GLUD1,CTSC,PSMA7,PSMB6,HSP90AB1,CLSTN1,HSP90AA1,PSMA3,C5,PSMA1,HSPA1B,ACTN4,FGA,PSMA5,RBP4,APP,VTN,GPC3,CDH2,CLSTN3,F10,FGG,APOE,FN1,F2,SERPINF2,CALR,PDIA3,THBS1,C3,LRG1,RELN,APOA1,TF,AGT,GOT1,PSME1,PSMB5,PSMA6,SOD1,MIF,FGB,IGF2,SPP1,ICAM1,PSMB4,DKK1
GO:BP	monosaccharide catabolic process	GO:0046365	0.000126266	3.89871	63	217	9	18117	PGAM1,ALDH1A1,GPI,GAPDH,PGK1,ENO1,ALDOA,PKM,TPI1
GO:BP	positive regulation of signaling	GO:0023056	0.000129176	3.88882	1782	217	48	18117	TFRC,GLUD1,CTSC,PSMA7,PSMB6,HSP90AB1,CLSTN1,HSP90AA1,PSMA3,C5,PSMA1,HSPA1B,ACTN4,FGA,PSMA5,RBP4,APP,VTN,GPC3,CDH2,CLSTN3,F10,FGG,APOE,FN1,F2,SERPINF2,CALR,PDIA3,THBS1,C3,LRG1,RELN,APOA1,TF,AGT,GOT1,PSME1,PSMB5,PSMA6,SOD1,MIF,FGB,IGF2,SPP1,ICAM1,PSMB4,DKK1
GO:BP	negative regulation of Wnt signaling pathway	GO:0030178	0.000131508	3.88105	218	217	15	18117	PSMA7,PSMB6,PSMA3,PSMA1,PSMA5,GPC3,CDH2,APOE,NOTUM,PSME1,PSMB5,PSMA6,IGFBP1,PSMB4,DKK1
GO:BP	plasma lipoprotein particle assembly	GO:0034377	0.00014376	3.84236	31	217	7	18117	P4HB,APOB,APOE,APOM,APOA2,APOA1,APOC3
GO:BP	regulation of cellular amino acid metabolic process	GO:0006521	0.000145414	3.83739	64	217	9	18117	PSMA7,PSMB6,PSMA3,PSMA1,PSMA5,PSME1,PSMB5,PSMA6,PSMB4
GO:BP	cellular response to decreased oxygen levels	GO:0036294	0.000167131	3.77694	222	217	15	18117	PSMA7,PSMB6,PGK1,ENO1,PSMA3,PSMA1,PSMA5,P4HB,VASN,PSME1,PSMB5,PSMA6,ICAM1,LMNA,PSMB4
GO:BP	interleukin-12-mediated signaling pathway	GO:0035722	0.000170368	3.76861	47	217	8	18117	TALDO1,P4HB,CFL1,RPLP0,HSPA9,SOD1,MIF,LMNB1
GO:BP	positive regulation of defense response	GO:0031349	0.000172678	3.76276	362	217	19	18117	CTSC,XRCC5,PSMA7,PSMB6,HSPD1,HSP90AA1,PSMA3,PSMA1,XRCC6,PSMA5,APP,C3,AGT,PSME1,PSMB5,PSMA6,CADM1,PGC,PSMB4
GO:BP	regulation of cell cycle G2/M phase transition	GO:1902749	0.000177307	3.75127	223	217	15	18117	PSMA7,PSMB6,HSP90AA1,PSMA3,PSMA1,TUBB4B,PSMA5,APP,TUBB,YWHAE,PSME1,PSMB5,PSMA6,NPM1,PSMB4
GO:BP	antigen processing and presentation of peptide antigen	GO:0048002	0.000178743	3.74777	192	217	14	18117	PSMA7,PSMB6,CTSD,PSMA3,PSMA1,CLTC,PSMA5,CALR,PDIA3,AZGP1,PSME1,PSMB5,PSMA6,PSMB4
GO:BP	anatomical structure homeostasis	GO:0060249	0.000185867	3.7308	482	217	22	18117	TFRC,XRCC5,HSP90AB1,HSP90AA1,PRDX1,ALDOA,XRCC6,RBP4,SERPINA3,LAMC1,ACTG1,ALB,TF,AZGP1,SOD1,CCT8,CCT3,HNRNPC,SPP1,LARGE1,LMNA,FH
GO:BP	homeostatic process	GO:0042592	0.000190511	3.72008	1981	217	51	18117	TFRC,ALDH1A1,AKR1C1,XRCC5,GPI,HSP90AB1,NME2,HSP90AA1,GSR,PDIA4,PRDX1,ALDOA,HSPA1B,XRCC6,HSP90B1,RBP4,APP,YWHAE,P4HB,CDH2,SERPINA3,APOB,APOE,APOM,APOA2,F2,CALR,LAMC1,ACTG1,PDIA3,APOA1,SERPINF1,APOC3,ALB,TF,AZGP1,PCSK9,AGT,CP,GOT1,PRDX3,HSPA9,SOD1,CCT8,CCT3,HNRNPC,SPP1,ICAM1,LARGE1,LMNA,FH
GO:BP	nucleobase-containing compound catabolic process	GO:0034655	0.000190767	3.7195	567	217	24	18117	AHCY,RPSA,PSMA7,PSMB6,RPLP2,PSMA3,PSMA1,HSPA8,HSPA1B,PSMA5,YWHAZ,SET,RNASET2,PSME1,PSMB5,PSMA6,SSB,RPLP0,RPL12,YBX1,KPNB1,HNRNPC,NPM1,PSMB4
GO:BP	secondary alcohol metabolic process	GO:1902652	0.000197706	3.70398	164	217	13	18117	ACAT2,FASN,RAN,IDH1,APP,APOB,APOE,APOA2,APOA1,PCSK9,SOD1,KPNB1,ACLY
GO:BP	regulation of defense response	GO:0031347	0.000211473	3.67474	704	217	27	18117	CTSC,XRCC5,PSMA7,PSMB6,HSP90AB1,HSPD1,HSP90AA1,PSMA3,PSMA1,XRCC6,PSMA5,APP,APOE,PROC,C3,A2M,APOA1,AHSG,SERPINF1,AGT,PSME1,PSMB5,PSMA6,CADM1,SOD1,PGC,PSMB4
GO:BP	protein folding in endoplasmic reticulum	GO:0034975	0.000223003	3.65169	11	217	5	18117	HSP90B1,P4HB,HSPA5,CALR,PDIA3
GO:BP	regulation of small molecule metabolic process	GO:0062012	0.000229406	3.63939	447	217	21	18117	FASN,RAN,PGAM1,PSMA7,PSMB6,ENO1,PSMA3,PSMA1,PSMA5,APP,APOB,APOE,APOA1,APOC3,PSME1,PSMB5,PSMA6,SOD1,KPNB1,IGF2,PSMB4
GO:BP	cellular response to interleukin-12	GO:0071349	0.000239362	3.62095	49	217	8	18117	TALDO1,P4HB,CFL1,RPLP0,HSPA9,SOD1,MIF,LMNB1
GO:BP	regulation of hematopoietic progenitor cell differentiation	GO:1901532	0.000239378	3.62092	89	217	10	18117	PSMA7,PSMB6,PSMA3,PSMA1,PSMA5,PSME1,PSMB5,PSMA6,HSPA9,PSMB4
GO:BP	aromatic compound catabolic process	GO:0019439	0.000279922	3.55296	623	217	25	18117	AHCY,RPSA,PSMA7,PSMB6,RPLP2,PSMA3,PSMA1,HSPA8,HSPA1B,PSMA5,YWHAZ,SET,RNASET2,AMBP,PSME1,PSMB5,PSMA6,SSB,RPLP0,RPL12,YBX1,KPNB1,HNRNPC,NPM1,PSMB4
GO:BP	negative regulation of multicellular organismal process	GO:0051241	0.00028035	3.5523	1160	217	36	18117	CTSC,ALDH1A1,HSP90AB1,NME2,PGK1,FBLN1,FGA,RBP4,TFPI,VTN,FGG,APOE,APOM,APOA2,FN1,PROC,F2,SERPINF2,CALR,THBS1,PROS1,APOA1,AHSG,SERPINF1,APOC3,VASN,ORM1,APOH,PCSK9,AGT,HSPA9,SOD1,FGB,SPP1,LMNA,DKK1
GO:BP	response to interleukin-12	GO:0070671	0.000282041	3.54969	50	217	8	18117	TALDO1,P4HB,CFL1,RPLP0,HSPA9,SOD1,MIF,LMNB1
GO:BP	cellular component assembly	GO:0022607	0.00028456	3.54583	3010	217	67	18117	AGRN,TFRC,CTSC,SPTAN1,RPSA,HSPA4,XRCC5,HSP90AB1,HSPD1,CLSTN1,HSP90AA1,KRT19,HSPA8,ALDOA,HSPA1B,CLTC,TUBB4B,FGA,HSP90B1,APP,TUBB,YWHAE,YWHAZ,SET,P4HB,SPTBN1,CDH2,GSN,CLSTN3,PTPRK,FGG,APOB,APOE,APOM,HSPA5,APOA2,FN1,SERPINF2,CALR,LAMC1,ACTG1,THBS1,SDC4,CLU,APOA1,DAG1,SERPINA1,KRT10,APOC3,AGT,F5,KRT8,ACTN1,RPLP0,HSPA9,RPL12,MIF,LAMB1,UGDH,FGB,CCT8,KPNB1,CCT3,NASP,NPM1,ICAM1,DKK1
GO:BP	plasma lipoprotein particle clearance	GO:0034381	0.000322692	3.49121	70	217	9	18117	CLTC,APOB,APOE,APOM,APOA2,APOA1,APOC3,PCSK9,HNRNPK
GO:BP	protein-lipid complex assembly	GO:0065005	0.00035298	3.45225	35	217	7	18117	P4HB,APOB,APOE,APOM,APOA2,APOA1,APOC3
GO:BP	regulation of cellular catabolic process	GO:0031329	0.000357197	3.44709	866	217	30	18117	PGAM1,CTSC,GAPDH,PSMA7,PSMB6,HSP90AB1,IDH1,HSP90AA1,PSMA3,PSMA1,HSPA8,HSPA1B,PSMA5,APP,YWHAZ,PSAP,SET,APOE,CLU,APOA1,APOC3,PCSK9,HP,PSME1,PSMB5,PSMA6,YBX1,HNRNPC,NPM1,PSMB4
GO:BP	activation of innate immune response	GO:0002218	0.000361883	3.44143	144	217	12	18117	XRCC5,PSMA7,PSMB6,HSP90AA1,PSMA3,PSMA1,XRCC6,PSMA5,PSME1,PSMB5,PSMA6,PSMB4
GO:BP	steroid metabolic process	GO:0008202	0.000369193	3.43275	342	217	18	18117	ACAT2,FASN,RAN,AKR1C1,APP,APOB,APOE,APOA2,APOA1,SERPINA6,AFP,PCSK9,AGT,SOD1,DHRS2,KPNB1,SPP1,ACLY
GO:BP	reverse cholesterol transport	GO:0043691	0.000380826	3.41927	22	217	6	18117	APOE,APOM,APOA2,CLU,APOA1,APOC3
GO:BP	cellular response to tumor necrosis factor	GO:0071356	0.000383195	3.41658	306	217	17	18117	PSMA7,PSMB6,PSMA3,PSMA1,HSPA1B,ACTN4,PSMA5,APOB,THBS1,APOA1,KRT8,PSME1,PSMB5,PSMA6,KRT18,ICAM1,PSMB4
GO:BP	antigen processing and presentation of exogenous peptide antigen	GO:0002478	0.000395427	3.40293	174	217	13	18117	PSMA7,PSMB6,CTSD,PSMA3,PSMA1,CLTC,PSMA5,CALR,PDIA3,PSME1,PSMB5,PSMA6,PSMB4
GO:BP	alcohol metabolic process	GO:0006066	0.000398729	3.39932	382	217	19	18117	ACAT2,FASN,RAN,ALDH1A1,AKR1C1,IDH1,TPI1,RBP4,APP,TTR,APOB,APOE,APOA2,APOA1,PCSK9,GOT1,SOD1,KPNB1,ACLY
GO:BP	regulation of G2/M transition of mitotic cell cycle	GO:0010389	0.000453636	3.34329	207	217	14	18117	PSMA7,PSMB6,HSP90AA1,PSMA3,PSMA1,TUBB4B,PSMA5,APP,TUBB,YWHAE,PSME1,PSMB5,PSMA6,PSMB4
GO:BP	cellular response to oxygen levels	GO:0071453	0.000462093	3.33527	240	217	15	18117	PSMA7,PSMB6,PGK1,ENO1,PSMA3,PSMA1,PSMA5,P4HB,VASN,PSME1,PSMB5,PSMA6,ICAM1,LMNA,PSMB4
GO:BP	cellular catabolic process	GO:0044248	0.000485241	3.31404	2347	217	56	18117	GLUD1,ACAT2,UBA1,AHCY,PGAM1,CTSC,RPSA,GAPDH,PSMA7,PSMB6,QPRT,HSP90AB1,IDH1,HSP90AA1,RPLP2,PSMA3,PSMA1,HSPA8,PRDX1,HSPA1B,CLTC,HSP90B1,PSMA5,TPI1,APP,YWHAZ,PSAP,CPN1,SET,APOB,APOE,HSPA5,APOA2,RNASET2,CLU,APOA1,AMBP,APOC3,PCSK9,HP,GOT1,PRDX3,PSME1,PSMB5,PSMA6,SSB,RPLP0,RPL12,ECH1,YBX1,KPNB1,HNRNPC,NPM1,CTSB,PSMB4,VCAN
GO:BP	regulation of cellular component organization	GO:0051128	0.000503303	3.29817	2412	217	57	18117	AGRN,TFRC,SPTAN1,XRCC5,CLSTN1,NME2,HSP90AA1,ENO1,HSPA8,HSPA1B,CLTC,APP,TUBB,YWHAE,YWHAZ,VTN,SET,GPC3,SPTBN1,CDH2,GSN,CLSTN3,APOE,APOM,HSPA5,APOA2,FN1,F2,SERPINF2,CALR,ACTG1,THBS1,C3,SDC4,RELN,CLU,APOA1,DAG1,SERPINF1,APOC3,TF,PCSK9,AGT,CFL1,IGFBP1,DPYSL2,CCT8,CCT3,PRKCSH,IGF2,HNRNPC,SPP1,NPM1,ICAM1,HNRNPK,LMNA,DKK1
GO:BP	protein refolding	GO:0042026	0.000510104	3.29234	23	217	6	18117	HSPD1,HSP90AA1,HSPA8,HSPA1B,HSPA5,HSPA9
GO:BP	regulation of catabolic process	GO:0009894	0.000524376	3.28036	1033	217	33	18117	PGAM1,CTSC,GAPDH,PSMA7,PSMB6,HSP90AB1,IDH1,HSP90AA1,PSMA3,PSMA1,HSPA8,HSPA1B,PSMA5,APP,YWHAZ,PSAP,SET,GPC3,APOE,C4BPA,APOA2,CLU,APOA1,APOC3,PCSK9,HP,PSME1,PSMB5,PSMA6,YBX1,HNRNPC,NPM1,PSMB4
GO:BP	cholesterol biosynthetic process	GO:0006695	0.000526169	3.27888	74	217	9	18117	ACAT2,FASN,RAN,APOB,APOE,APOA1,SOD1,KPNB1,ACLY
GO:BP	secondary alcohol biosynthetic process	GO:1902653	0.000526169	3.27888	74	217	9	18117	ACAT2,FASN,RAN,APOB,APOE,APOA1,SOD1,KPNB1,ACLY
GO:BP	complement activation	GO:0006956	0.000586024	3.23208	180	217	13	18117	C5,VTN,CPN1,C4BPA,CFI,C4B,F2,PROS1,C3,A2M,CLU,C2,CPN2
GO:BP	non-canonical Wnt signaling pathway	GO:0035567	0.000607879	3.21618	151	217	12	18117	PSMA7,PSMB6,PSMA3,PSMA1,CLTC,PSMA5,GPC3,PSME1,PSMB5,PSMA6,PSMB4,DKK1
GO:BP	positive regulation of cell-substrate adhesion	GO:0010811	0.000635667	3.19677	124	217	11	18117	FBLN1,FGA,NID1,P4HB,FGG,FN1,CALR,SDC4,APOA1,DAG1,FGB
GO:BP	antigen processing and presentation of exogenous antigen	GO:0019884	0.000665807	3.17665	182	217	13	18117	PSMA7,PSMB6,CTSD,PSMA3,PSMA1,CLTC,PSMA5,CALR,PDIA3,PSME1,PSMB5,PSMA6,PSMB4
GO:BP	response to interleukin-1	GO:0070555	0.000721351	3.14185	215	217	14	18117	PSMA7,PSMB6,PSMA3,PSMA1,PSMA5,APP,TFPI,FGG,PSME1,PSMB5,PSMA6,FGB,ICAM1,PSMB4
GO:BP	cell morphogenesis involved in differentiation	GO:0000904	0.000726278	3.1389	749	217	27	18117	SPTAN1,ATRN,HSP90AB1,HSP90AA1,FBLN1,ACTN4,FGA,APP,P4HB,SPTBN1,CDH2,FGG,APOE,FN1,CALR,LAMC1,RELN,APOA1,DAG1,CFL1,ACTN1,SOD1,LAMB1,DPYSL2,FGB,ALCAM,SPP1
GO:BP	cholesterol metabolic process	GO:0008203	0.000752635	3.12342	154	217	12	18117	ACAT2,FASN,RAN,APP,APOB,APOE,APOA2,APOA1,PCSK9,SOD1,KPNB1,ACLY
GO:BP	regulation of animal organ morphogenesis	GO:2000027	0.000755182	3.12195	184	217	13	18117	PSMA7,PSMB6,PSMA3,PSMA1,CLTC,PSMA5,GPC3,AGT,PSME1,PSMB5,PSMA6,PSMB4,DKK1
GO:BP	positive regulation of signal transduction	GO:0009967	0.000765449	3.11608	1598	217	43	18117	TFRC,CTSC,PSMA7,PSMB6,HSP90AB1,HSP90AA1,PSMA3,C5,PSMA1,HSPA1B,ACTN4,FGA,PSMA5,APP,VTN,GPC3,CDH2,F10,FGG,APOE,FN1,F2,SERPINF2,CALR,PDIA3,THBS1,C3,LRG1,RELN,APOA1,TF,AGT,GOT1,PSME1,PSMB5,PSMA6,SOD1,MIF,FGB,IGF2,ICAM1,PSMB4,DKK1
GO:BP	positive regulation of response to biotic stimulus	GO:0002833	0.000781383	3.10714	250	217	15	18117	XRCC5,PSMA7,PSMB6,HSPD1,HSP90AA1,PSMA3,PSMA1,XRCC6,PSMA5,PSME1,PSMB5,PSMA6,CADM1,PGC,PSMB4
GO:BP	cellular response to interleukin-1	GO:0071347	0.000803775	3.09487	185	217	13	18117	PSMA7,PSMB6,PSMA3,PSMA1,PSMA5,TFPI,FGG,PSME1,PSMB5,PSMA6,FGB,ICAM1,PSMB4
GO:BP	regulation of metabolic process	GO:0019222	0.000824381	3.08387	7148	217	122	18117	AGRN,TFRC,FASN,RAN,PGAM1,CTSC,RPSA,ALDH1A1,XRCC5,GPI,GAPDH,PSMA7,PSMB6,HSP90AB1,HSPD1,NME2,IDH1,CTSD,HSP90AA1,PGK1,FBLN1,HSPE1,RPLP2,ENO1,PSMA3,C5,PSMA1,HSPA8,HSPA1B,XRCC6,ACTN4,CLTC,PKM,HSP90B1,PSMA5,RBP4,APP,YWHAE,TFPI,EEF2,YWHAZ,PSAP,VTN,SET,GPC3,SERPINA7,SPTBN1,GSN,PTPRK,SERPINA3,APOB,APOE,C4BPA,SERPIND1,HSPA5,APOA2,C4B,FN1,F2,SERPINF2,CALR,ACTG1,ITIH2,THBS1,PROS1,C3,A2M,SERPINA5,SDC4,RELN,CL…
GO:BP	regulation of transcription from RNA polymerase II promoter in response to hypoxia	GO:0061418	0.000832972	3.07937	78	217	9	18117	PSMA7,PSMB6,PSMA3,PSMA1,PSMA5,PSME1,PSMB5,PSMA6,PSMB4
GO:BP	cellular macromolecule metabolic process	GO:0044260	0.000863622	3.06368	8390	217	137	18117	AGRN,TFRC,RAN,UBA1,CTSC,RPSA,XRCC5,GPI,GAPDH,PSMA7,PSMB6,HSP90AB1,HSPD1,EEF1G,NME2,CTSD,HSP90AA1,FBLN1,HSPE1,RPLP2,PDIA4,ENO1,PSMA3,C5,PSMA1,HSPA8,HSPA1B,XRCC6,ACTN4,CLTC,PKM,FGA,HSP90B1,PSMA5,APP,YWHAE,TFPI,EEF2,YWHAZ,VTN,SET,P4HB,GPC3,SERPINA7,SPTBN1,CDH2,GSN,PTPRK,SERPINA3,FGG,TTR,APOB,APOE,SERPIND1,HSPA5,APOA2,C4B,FN1,PROC,F2,SERPINF2,CALR,LAMC1,PDIA3,ITIH2,THBS1,PROS1,CPE,C3,A2M,SERPINA5,SDC…
GO:BP	organic hydroxy compound metabolic process	GO:1901615	0.000864357	3.06331	571	217	23	18117	ACAT2,FASN,RAN,ALDH1A1,AKR1C1,IDH1,LDHA,PSAT1,TPI1,RBP4,APP,TTR,APOB,APOE,APOA2,APOA1,PCSK9,PLTP,GOT1,SOD1,KPNB1,CTSB,ACLY
GO:BP	hexose metabolic process	GO:0019318	0.00091014	3.04089	253	217	15	18117	PGAM1,ALDH1A1,GPI,GAPDH,PGK1,ENO1,ALDOA,PKM,MDH1,TPI1,RBP4,GOT1,MDH2,IGF2,FUCA2
GO:BP	regulation of substrate adhesion-dependent cell spreading	GO:1900024	0.000927526	3.03267	58	217	8	18117	FBLN1,ACTN4,FGA,P4HB,FGG,CALR,APOA1,FGB
GO:BP	protein-containing complex subunit organization	GO:0043933	0.000932159	3.03051	1963	217	49	18117	TFRC,CTSC,SPTAN1,RPSA,HSPA4,XRCC5,HSP90AB1,HSPD1,HSP90AA1,HSPA8,ALDOA,HSPA1B,CLTC,FGA,SET,P4HB,SPTBN1,GSN,FGG,APOB,APOE,APOM,HSPA5,APOA2,FN1,CALR,LAMC1,CLU,APOA1,SERPINA1,KRT10,APOC3,ALB,AGT,F5,PLTP,CFL1,RPLP0,RPL12,MIF,UGDH,FGB,CCT8,CCT3,NASP,NPM1,ICAM1,APEH,DKK1
GO:BP	triglyceride-rich lipoprotein particle remodeling	GO:0034370	0.00093839	3.02762	14	217	5	18117	APOB,APOE,APOA2,APOA1,APOC3
GO:BP	sterol biosynthetic process	GO:0016126	0.00103754	2.984	80	217	9	18117	ACAT2,FASN,RAN,APOB,APOE,APOA1,SOD1,KPNB1,ACLY
GO:BP	regulation of cell-substrate adhesion	GO:0010810	0.00106421	2.97297	222	217	14	18117	FBLN1,ACTN4,FGA,NID1,P4HB,FGG,FN1,CALR,ACTG1,THBS1,SDC4,APOA1,DAG1,FGB
GO:BP	positive regulation of protein metabolic process	GO:0051247	0.00113922	2.94339	1564	217	42	18117	TFRC,CTSC,XRCC5,HSP90AB1,HSPD1,CTSD,HSP90AA1,FBLN1,HSPE1,ENO1,C5,HSPA1B,XRCC6,PKM,APP,EEF2,VTN,GPC3,GSN,APOE,C4BPA,HSPA5,FN1,F2,THBS1,C3,SDC4,RELN,CLU,DAG1,TF,PCSK9,AGT,PSME1,SOD1,MIF,CRLF1,IGF2,NPM1,ICAM1,LMNA,DKK1
GO:BP	protein-containing complex assembly	GO:0065003	0.00114698	2.94045	1680	217	44	18117	TFRC,CTSC,SPTAN1,RPSA,HSPA4,XRCC5,HSP90AB1,HSPD1,HSP90AA1,HSPA8,ALDOA,HSPA1B,CLTC,FGA,SET,P4HB,SPTBN1,GSN,FGG,APOB,APOE,APOM,HSPA5,APOA2,FN1,CALR,LAMC1,CLU,APOA1,SERPINA1,KRT10,APOC3,F5,RPLP0,RPL12,MIF,UGDH,FGB,CCT8,CCT3,NASP,NPM1,ICAM1,DKK1
GO:BP	response to tumor necrosis factor	GO:0034612	0.00115873	2.93602	331	217	17	18117	PSMA7,PSMB6,PSMA3,PSMA1,HSPA1B,ACTN4,PSMA5,APOB,THBS1,APOA1,KRT8,PSME1,PSMB5,PSMA6,KRT18,ICAM1,PSMB4
GO:BP	stem cell differentiation	GO:0048863	0.00116781	2.93263	258	217	15	18117	XRCC5,PSMA7,PSMB6,PSMA3,PSMA1,PSMA5,CDH2,FN1,A2M,PSME1,PSMB5,PSMA6,KRT18,HSPA9,PSMB4
GO:BP	positive regulation of cytokine production	GO:0001819	0.00120958	2.91737	452	217	20	18117	XRCC5,GAPDH,HSPD1,HSP90AA1,C5,HSPA1B,XRCC6,APP,SPTBN1,APOA2,SERPINF2,THBS1,C3,CLU,ORM2,ORM1,AGT,CADM1,SOD1,MIF
GO:BP	regulation of cellular amine metabolic process	GO:0033238	0.00128429	2.89134	82	217	9	18117	PSMA7,PSMB6,PSMA3,PSMA1,PSMA5,PSME1,PSMB5,PSMA6,PSMB4
GO:BP	negative regulation of gene expression	GO:0010629	0.00135108	2.86932	1460	217	40	18117	RAN,RPSA,GAPDH,PSMA7,PSMB6,HSP90AB1,FBLN1,RPLP2,PSMA3,PSMA1,HSPA8,HSPA1B,PSMA5,APP,YWHAZ,SET,APOE,APOA2,FN1,F2,SERPINF2,CALR,THBS1,APOA1,SERPINF1,ORM1,PSME1,PSMB5,PSMA6,SSB,ILF3,RPLP0,RPL12,MIF,YBX1,HNRNPC,NPM1,NCL,HNRNPK,PSMB4
GO:BP	NIK/NF-kappaB signaling	GO:0038061	0.00138412	2.85883	194	217	13	18117	PSMA7,PSMB6,PSMA3,PSMA1,PRDX1,ACTN4,PSMA5,APP,CALR,PSME1,PSMB5,PSMA6,PSMB4
GO:BP	nucleoside diphosphate phosphorylation	GO:0006165	0.00139181	2.85642	134	217	11	18117	PGAM1,GPI,GAPDH,NME2,PGK1,LDHA,ENO1,ALDOA,PKM,TPI1,APP
GO:BP	nucleotide phosphorylation	GO:0046939	0.00149954	2.82404	135	217	11	18117	PGAM1,GPI,GAPDH,NME2,PGK1,LDHA,ENO1,ALDOA,PKM,TPI1,APP
GO:BP	regulation of protein stability	GO:0031647	0.00153714	2.81329	300	217	16	18117	GAPDH,HSP90AB1,HSPD1,HSP90AA1,HSPA8,HSPA1B,GSN,APOA2,CALR,CLU,APOA1,CPN2,TF,CCT8,CCT3,LMNA
GO:BP	cell morphogenesis	GO:0000902	0.00174641	2.75785	1037	217	32	18117	SPTAN1,ATRN,HSP90AB1,HSP90AA1,FBLN1,ALDOA,ACTN4,FGA,APP,P4HB,SPTBN1,CDH2,FGG,APOE,FN1,F2,CALR,LAMC1,RELN,CLU,APOA1,DAG1,CFL1,CAP1,ACTN1,SOD1,LAMB1,DPYSL2,FGB,ALCAM,SPP1,ICAM1
GO:BP	anaphase-promoting complex-dependent catabolic process	GO:0031145	0.00174926	2.75714	85	217	9	18117	PSMA7,PSMB6,PSMA3,PSMA1,PSMA5,PSME1,PSMB5,PSMA6,PSMB4
GO:BP	positive regulation of cellular protein metabolic process	GO:0032270	0.00181463	2.74121	1477	217	40	18117	TFRC,CTSC,XRCC5,HSP90AB1,HSPD1,CTSD,HSP90AA1,FBLN1,HSPE1,ENO1,C5,HSPA1B,XRCC6,PKM,APP,EEF2,VTN,GSN,APOE,HSPA5,FN1,F2,THBS1,C3,SDC4,RELN,CLU,DAG1,TF,PCSK9,AGT,PSME1,SOD1,MIF,CRLF1,IGF2,NPM1,ICAM1,LMNA,DKK1
GO:BP	organic substance transport	GO:0071702	0.00183968	2.73526	2766	217	61	18117	TFRC,GLUD1,RAN,RPSA,AKR1C1,HSPA4,HSP90AB1,HSPD1,CLSTN1,IDH1,HSP90AA1,RPLP2,PDIA4,HSPA8,ACTN4,CLTC,FGA,HSP90B1,RBP4,YWHAE,YWHAZ,PSAP,GPC3,SPTBN1,FGG,APOB,APOE,APOM,APOC4-APOC2,HSPA5,APOA2,CALR,THBS1,C3,SERPINA5,CLU,APOA1,APOC3,APOH,TF,AZGP1,PCSK9,AGT,PLTP,KRT18,SSB,RPLP0,HSPA9,RPL12,ECH1,DPYSL2,FGB,YBX1,KPNB1,NASP,SPP1,NPM1,NUCB1,CSE1L,LMNA,GDI2
GO:BP	regulation of transcription from RNA polymerase II promoter in response to stress	GO:0043618	0.00192984	2.71448	111	217	10	18117	PSMA7,PSMB6,PSMA3,PSMA1,PSMA5,HSPA5,PSME1,PSMB5,PSMA6,PSMB4
GO:BP	protein localization	GO:0008104	0.00193321	2.71372	2770	217	61	18117	AGRN,TFRC,GLUD1,RAN,RPSA,HSPA4,XRCC5,HSP90AB1,HSPD1,CLSTN1,IDH1,CTSD,HSP90AA1,RPLP2,PDIA4,HSPA8,ACTN4,CLTC,FGA,HSP90B1,RBP4,YWHAE,YWHAZ,GPC3,SPTBN1,CDH2,GSN,CLSTN3,PTPRK,FGG,APOB,APOE,HSPA5,F2,CALR,ACTG1,CPE,RELN,CLU,DAG1,TF,AZGP1,AGT,KRT18,SSB,RPLP0,HSPA9,RPL12,ECH1,CUTA,FGB,YBX1,CCT8,KPNB1,CCT3,NASP,NPM1,NUCB1,CSE1L,LMNA,GDI2
GO:BP	positive regulation of cellular process	GO:0048522	0.00197707	2.70398	5757	217	103	18117	AGRN,TFRC,GLUD1,FASN,RAN,CTSC,XRCC5,GPI,PSMA7,PSMB6,HSP90AB1,HSPD1,CLSTN1,NME2,CTSD,HSP90AA1,PGK1,LDHA,FBLN1,HSPE1,ENO1,PSMA3,C5,PSMA1,HSPA8,CLIC1,HSPA1B,XRCC6,ACTN4,PKM,FGA,NID1,PSMA5,RBP4,APP,YWHAE,EEF2,YWHAZ,VTN,P4HB,GPC3,SPTBN1,CDH2,GSN,CLSTN3,F10,FGG,APOB,APOE,HSPA5,APOA2,C4B,FN1,PROC,F2,SERPINF2,CALR,LAMC1,ACTG1,PDIA3,THBS1,C3,LRG1,SDC4,RELN,CLU,APOA1,C2,AHSG,DAG1,SERPINF1,TF,PCSK9,AGT,HP,G…
GO:BP	cholesterol transport	GO:0030301	0.00209711	2.67838	112	217	10	18117	AKR1C1,APOB,APOE,APOM,APOA2,CLU,APOA1,APOC3,PCSK9,PLTP
GO:BP	positive regulation of cellular component organization	GO:0051130	0.0021255	2.67254	1153	217	34	18117	AGRN,TFRC,XRCC5,CLSTN1,NME2,HSP90AA1,HSPA1B,APP,YWHAE,YWHAZ,VTN,GPC3,GSN,CLSTN3,APOE,HSPA5,FN1,SERPINF2,C3,SDC4,RELN,CLU,APOA1,DAG1,SERPINF1,TF,PCSK9,AGT,CCT8,CCT3,IGF2,ICAM1,HNRNPK,LMNA
GO:BP	regulation of innate immune response	GO:0045088	0.00227085	2.64381	309	217	16	18117	XRCC5,PSMA7,PSMB6,HSP90AB1,HSP90AA1,PSMA3,PSMA1,XRCC6,PSMA5,APOE,A2M,PSME1,PSMB5,PSMA6,CADM1,PSMB4
GO:BP	sterol metabolic process	GO:0016125	0.00231405	2.63563	171	217	12	18117	ACAT2,FASN,RAN,APP,APOB,APOE,APOA2,APOA1,PCSK9,SOD1,KPNB1,ACLY
GO:BP	hematopoietic progenitor cell differentiation	GO:0002244	0.00246168	2.60877	172	217	12	18117	XRCC5,PSMA7,PSMB6,PSMA3,PSMA1,PSMA5,EEF2,PSME1,PSMB5,PSMA6,HSPA9,PSMB4
GO:BP	cellular component biogenesis	GO:0044085	0.00250897	2.6005	3257	217	68	18117	AGRN,TFRC,RAN,CTSC,SPTAN1,RPSA,HSPA4,XRCC5,HSP90AB1,HSPD1,CLSTN1,HSP90AA1,KRT19,HSPA8,ALDOA,HSPA1B,CLTC,TUBB4B,FGA,HSP90B1,APP,TUBB,YWHAE,YWHAZ,SET,P4HB,SPTBN1,CDH2,GSN,CLSTN3,PTPRK,FGG,APOB,APOE,APOM,HSPA5,APOA2,FN1,SERPINF2,CALR,LAMC1,ACTG1,THBS1,SDC4,CLU,APOA1,DAG1,SERPINA1,KRT10,APOC3,AGT,F5,KRT8,ACTN1,RPLP0,HSPA9,RPL12,MIF,LAMB1,UGDH,FGB,CCT8,KPNB1,CCT3,NASP,NPM1,ICAM1,DKK1
GO:BP	regulation of stem cell differentiation	GO:2000736	0.00267729	2.57231	115	217	10	18117	PSMA7,PSMB6,PSMA3,PSMA1,PSMA5,PSME1,PSMB5,PSMA6,HSPA9,PSMB4
GO:BP	glycolytic process	GO:0006096	0.00267729	2.57231	115	217	10	18117	PGAM1,GPI,GAPDH,PGK1,LDHA,ENO1,ALDOA,PKM,TPI1,APP
GO:BP	high-density lipoprotein particle clearance	GO:0034384	0.00281663	2.55027	17	217	5	18117	APOE,APOM,APOA2,APOA1,APOC3
GO:BP	positive regulation of phagocytosis	GO:0050766	0.00287766	2.54096	67	217	8	18117	APOA2,C4B,CALR,C3,APOA1,C2,AHSG,SOD1
GO:BP	ATP generation from ADP	GO:0006757	0.00289956	2.53767	116	217	10	18117	PGAM1,GPI,GAPDH,PGK1,LDHA,ENO1,ALDOA,PKM,TPI1,APP
GO:BP	glyceraldehyde-3-phosphate metabolic process	GO:0019682	0.00293422	2.53251	8	217	4	18117	ALDH1A1,TALDO1,TKT,TPI1
GO:BP	positive regulation of tau-protein kinase activity	GO:1902949	0.00293422	2.53251	8	217	4	18117	HSP90AB1,HSP90AA1,CLU,DKK1
GO:BP	regulation of DNA-templated transcription in response to stress	GO:0043620	0.00313775	2.50338	117	217	10	18117	PSMA7,PSMB6,PSMA3,PSMA1,PSMA5,HSPA5,PSME1,PSMB5,PSMA6,PSMB4
GO:BP	regulation of mRNA metabolic process	GO:1903311	0.00316331	2.49986	356	217	17	18117	PSMA7,PSMB6,PSMA3,PSMA1,HSPA8,PSMA5,YWHAZ,SET,PSME1,PSMB5,PSMA6,YBX1,HNRNPC,NPM1,NCL,HNRNPK,PSMB4
GO:BP	glucose metabolic process	GO:0006006	0.00356945	2.4474	211	217	13	18117	PGAM1,GPI,GAPDH,PGK1,ENO1,ALDOA,PKM,MDH1,TPI1,RBP4,GOT1,MDH2,IGF2
GO:BP	anion transport	GO:0006820	0.00368259	2.43385	2889	217	62	18117	TFRC,GLUD1,RAN,RPSA,AKR1C1,HSPA4,HSP90AB1,HSPD1,CLSTN1,IDH1,HSP90AA1,RPLP2,PDIA4,HSPA8,CLIC1,ACTN4,CLTC,FGA,HSP90B1,RBP4,YWHAE,YWHAZ,PSAP,GPC3,SPTBN1,FGG,APOB,APOE,APOM,APOC4-APOC2,HSPA5,APOA2,CALR,THBS1,C3,SERPINA5,CLU,APOA1,APOC3,APOH,TF,AZGP1,PCSK9,AGT,PLTP,KRT18,SSB,RPLP0,HSPA9,RPL12,ECH1,DPYSL2,FGB,YBX1,KPNB1,NASP,SPP1,NPM1,NUCB1,CSE1L,LMNA,GDI2
GO:BP	cell cycle G2/M phase transition	GO:0044839	0.00373084	2.42819	283	217	15	18117	PSMA7,PSMB6,HSP90AA1,PSMA3,PSMA1,TUBB4B,PSMA5,APP,TUBB,YWHAE,PSME1,PSMB5,PSMA6,NPM1,PSMB4
GO:BP	membrane organization	GO:0061024	0.00408725	2.38857	973	217	30	18117	AGRN,TFRC,CTSC,HSPA4,HSP90AA1,HSPA8,CLTC,YWHAE,YWHAZ,SPTBN1,CDH2,GSN,APOB,APOE,APOA2,CALR,ACTG1,THBS1,C3,SERPINA5,RELN,CLU,APOA1,SERPINA1,TF,F5,PLTP,HSPA9,SOD1,LMNA
GO:BP	regulation of vesicle-mediated transport	GO:0060627	0.00441537	2.35503	536	217	21	18117	FGA,VTN,GPC3,FGG,APOE,APOA2,C4B,CALR,C3,SDC4,CLU,APOA1,C2,AHSG,APOC3,TF,PCSK9,SOD1,FGB,HNRNPK,DKK1
GO:BP	SCF-dependent proteasomal ubiquitin-dependent protein catabolic process	GO:0031146	0.00450169	2.34662	95	217	9	18117	PSMA7,PSMB6,PSMA3,PSMA1,PSMA5,PSME1,PSMB5,PSMA6,PSMB4
GO:BP	positive regulation of innate immune response	GO:0045089	0.00463349	2.33409	216	217	13	18117	XRCC5,PSMA7,PSMB6,HSP90AA1,PSMA3,PSMA1,XRCC6,PSMA5,PSME1,PSMB5,PSMA6,CADM1,PSMB4
GO:BP	establishment of protein localization to organelle	GO:0072594	0.00473289	2.32487	584	217	22	18117	RAN,RPSA,HSPA4,HSP90AB1,HSPD1,IDH1,HSP90AA1,RPLP2,HSPA8,YWHAE,YWHAZ,HSPA5,CLU,AGT,RPLP0,RPL12,ECH1,CCT8,KPNB1,CCT3,CSE1L,LMNA
GO:BP	ADP metabolic process	GO:0046031	0.00495827	2.30467	123	217	10	18117	PGAM1,GPI,GAPDH,PGK1,LDHA,ENO1,ALDOA,PKM,TPI1,APP
GO:BP	aging	GO:0007568	0.00514186	2.28888	329	217	16	18117	CTSC,APP,EEF2,GSN,CALR,DAG1,SERPINF1,AGT,IGFBP1,SOD1,MIF,YBX1,NPM1,ICAM1,LMNA,DKK1
GO:BP	carbohydrate derivative metabolic process	GO:1901135	0.00515904	2.28743	1145	217	33	18117	AGRN,FASN,RAN,AHCY,PGAM1,ALDH1A1,AKR1C1,GPI,GAPDH,NME2,PGK1,LDHA,TALDO1,ENO1,ATIC,ALDOA,CLTC,PKM,TKT,TPI1,APP,PSAP,GPC3,PAICS,ITIH2,SDC4,ITIH3,UGDH,PRKCSH,FUCA2,LARGE1,ACLY,VCAN
GO:BP	oxaloacetate metabolic process	GO:0006107	0.00523199	2.28133	9	217	4	18117	MDH1,GOT1,MDH2,ACLY
GO:BP	positive regulation of cholesterol esterification	GO:0010873	0.00523199	2.28133	9	217	4	18117	APOE,APOA2,APOA1,AGT
GO:BP	regulation of cell morphogenesis involved in differentiation	GO:0010769	0.00536341	2.27056	97	217	9	18117	FBLN1,ACTN4,FGA,P4HB,FGG,CALR,RELN,APOA1,FGB
GO:BP	response to metal ion	GO:0010038	0.00553533	2.25686	371	217	17	18117	GPI,GGH,FGA,APP,GSN,FGG,HSPA5,CALR,ACTG1,THBS1,SERPINF1,TF,GOT1,SOD1,CUTA,FGB,ICAM1
GO:BP	sterol transport	GO:0015918	0.00574159	2.24097	125	217	10	18117	AKR1C1,APOB,APOE,APOM,APOA2,CLU,APOA1,APOC3,PCSK9,PLTP
GO:BP	regulation of response to biotic stimulus	GO:0002831	0.00603951	2.219	415	217	18	18117	XRCC5,PSMA7,PSMB6,HSP90AB1,HSPD1,HSP90AA1,PSMA3,PSMA1,XRCC6,PSMA5,APOE,A2M,PSME1,PSMB5,PSMA6,CADM1,PGC,PSMB4
GO:BP	dicarboxylic acid metabolic process	GO:0043648	0.00636348	2.19631	99	217	9	18117	GLUD1,QPRT,IDH1,ATIC,MDH1,GOT1,MDH2,ACLY,FH
GO:BP	cell development	GO:0048468	0.0066171	2.17933	2100	217	49	18117	AGRN,FASN,SPTAN1,XRCC5,ATRN,HSP90AB1,NME2,HSP90AA1,KRT19,FBLN1,ACTN4,FGA,APP,YWHAZ,P4HB,SPTBN1,CDH2,GSN,PTPRK,FGG,APOE,HSPA5,FN1,PROC,F2,CALR,LAMC1,ACTG1,C3,SDC4,RELN,CLU,APOA1,DAG1,SERPINF1,AGT,CFL1,KRT8,ACTN1,SOD1,LAMB1,UGDH,DPYSL2,FGB,ALCAM,PRKCSH,SPP1,ICAM1,LMNA
GO:BP	regulation of canonical Wnt signaling pathway	GO:0060828	0.00704852	2.1519	298	217	15	18117	PSMA7,PSMB6,PSMA3,PSMA1,PSMA5,GPC3,CDH2,APOE,NOTUM,PSME1,PSMB5,PSMA6,IGFBP1,PSMB4,DKK1
GO:BP	nucleoside diphosphate metabolic process	GO:0009132	0.00708438	2.1497	158	217	11	18117	PGAM1,GPI,GAPDH,NME2,PGK1,LDHA,ENO1,ALDOA,PKM,TPI1,APP
GO:BP	regulation of cell differentiation	GO:0045595	0.0071798	2.14389	1679	217	42	18117	XRCC5,PSMA7,PSMB6,HSP90AB1,NME2,FBLN1,PSMA3,PSMA1,CLIC1,HSPA1B,XRCC6,ACTN4,FGA,PSMA5,APP,P4HB,CDH2,FGG,APOB,FN1,PROC,F2,SERPINF2,CALR,THBS1,RELN,APOA1,DAG1,SERPINF1,VASN,AGT,PSME1,PSMB5,PSMA6,HSPA9,SOD1,DPYSL2,FGB,IGF2,SPP1,PSMB4,DKK1
GO:BP	response to oxygen-containing compound	GO:1901700	0.00720513	2.14236	1739	217	43	18117	AGRN,AKR1C1,XRCC5,GPI,HSP90AB1,HSPD1,NME2,LDHA,PRDX1,GGH,PKM,HSP90B1,RBP4,APP,TFPI,EEF2,GSN,PTPRK,APOB,APOE,APOM,HSPA5,APOA2,CALR,THBS1,CLU,AHSG,DAG1,SERPINF1,PCSK9,AGT,HP,GOT1,PRDX3,KRT8,KRT18,IGFBP1,SOD1,DPYSL2,IGF2,NASP,SPP1,ICAM1
GO:BP	negative regulation of G2/M transition of mitotic cell cycle	GO:0010972	0.0081629	2.08816	102	217	9	18117	PSMA7,PSMB6,PSMA3,PSMA1,PSMA5,PSME1,PSMB5,PSMA6,PSMB4
GO:BP	protein stabilization	GO:0050821	0.00822289	2.08498	193	217	12	18117	GAPDH,HSP90AB1,HSPD1,HSP90AA1,HSPA1B,APOA2,CALR,CLU,APOA1,CPN2,CCT8,CCT3
GO:BP	positive regulation of developmental process	GO:0051094	0.00862065	2.06446	1341	217	36	18117	AGRN,TFRC,XRCC5,HSP90AB1,CLSTN1,NME2,C5,CLIC1,HSPA1B,XRCC6,PKM,FGA,P4HB,CDH2,CLSTN3,FGG,APOB,APOE,FN1,PROC,SERPINF2,CALR,THBS1,C3,LRG1,RELN,APOA1,DAG1,KRT10,SERPINF1,AGT,CFL1,FGB,IGF2,LMNA,DKK1
GO:BP	negative regulation of fibrinolysis	GO:0051918	0.00863809	2.06358	10	217	4	18117	F2,SERPINF2,THBS1,APOH
GO:BP	G2/M transition of mitotic cell cycle	GO:0000086	0.00865429	2.06277	265	217	14	18117	PSMA7,PSMB6,HSP90AA1,PSMA3,PSMA1,TUBB4B,PSMA5,APP,TUBB,YWHAE,PSME1,PSMB5,PSMA6,PSMB4
GO:BP	lipid metabolic process	GO:0006629	0.00878859	2.05608	1457	217	38	18117	AGRN,ACAT2,FASN,RAN,ALDH1A1,AKR1C1,IDH1,RBP4,APP,PSAP,GPC3,SERPINA3,TTR,APOB,APOE,APOM,APOC4-APOC2,APOA2,F2,C3,SDC4,CLU,APOA1,SERPINA6,APOC3,AFP,APOH,PCSK9,AGT,PLTP,SOD1,ECH1,MIF,DHRS2,KPNB1,SPP1,LARGE1,ACLY
GO:BP	chaperone-mediated protein complex assembly	GO:0051131	0.00890737	2.05025	21	217	5	18117	HSPA4,HSP90AB1,HSPD1,HSP90AA1,CLU
GO:BP	cellular macromolecule catabolic process	GO:0044265	0.00904116	2.04378	1231	217	34	18117	UBA1,CTSC,RPSA,PSMA7,PSMB6,HSP90AB1,HSP90AA1,RPLP2,PSMA3,PSMA1,HSPA8,HSPA1B,CLTC,HSP90B1,PSMA5,YWHAZ,SET,APOE,HSPA5,RNASET2,CLU,PCSK9,PSME1,PSMB5,PSMA6,SSB,RPLP0,RPL12,YBX1,KPNB1,HNRNPC,NPM1,CTSB,PSMB4
GO:BP	reproductive structure development	GO:0048608	0.00958698	2.01832	429	217	18	18117	HSP90AB1,IDH1,KRT19,RBP4,PSAP,HSPA5,C3,SERPINA5,SERPINF1,AFP,PRDX3,KRT8,SOD1,IGF2,NASP,SPP1,ICAM1,CTSB
GO:BP	protein maturation	GO:0051604	0.00973315	2.01175	306	217	15	18117	HSPD1,PGK1,ENO1,FGA,CPN1,GSN,FGG,SERPINF2,CALR,THBS1,CPE,APOH,PCSK9,HP,FGB
GO:BP	cellular component organization	GO:0016043	0.00982744	2.00756	6566	217	111	18117	AGRN,TFRC,RAN,CTSC,SPTAN1,RPSA,HSPA4,XRCC5,GAPDH,HSP90AB1,HSPD1,CLSTN1,NME2,IDH1,HSP90AA1,KRT19,FBLN1,ENO1,HSPA8,TUBA1B,ALDOA,HSPA1B,XRCC6,CLTC,TUBB4B,FGA,HSP90B1,TPM3,NID1,APP,TUBB,YWHAE,YWHAZ,VTN,SET,P4HB,GPC3,SPTBN1,CDH2,GSN,CLSTN3,FLNB,PTPRK,FGG,TTR,APOB,APOE,APOM,HSPA5,APOA2,FN1,F2,SERPINF2,CALR,LAMC1,ACTG1,THBS1,C3,A2M,SERPINA5,SDC4,RELN,CLU,APOA1,MATN3,DAG1,SERPINA1,KRT10,SERPINF1,APOC3,AL…
GO:BP	cellular response to stimulus	GO:0051716	0.0103017	1.98709	7781	217	126	18117	AGRN,TFRC,FASN,UBA1,CTSC,SPTAN1,AKR1C1,XRCC5,GPI,GAPDH,PSMA7,PSMB6,HSP90AB1,HSPD1,NME2,HSP90AA1,KRT19,PGK1,FBLN1,TALDO1,GSR,PDIA4,ENO1,ATIC,PSMA3,C5,PSMA1,HSPA8,TUBA1B,CLIC1,PRDX1,HSPA1B,XRCC6,ACTN4,CLTC,PKM,FGA,HSP90B1,PSMA5,APP,YWHAE,TFPI,EEF2,YWHAZ,PSAP,VTN,P4HB,GPC3,SPTBN1,CDH2,GSN,FLNB,PTPRK,F10,FGG,TTR,APOB,APOE,APOM,HSPA5,FN1,F2,SERPINF2,CALR,ACTG1,PDIA3,THBS1,CPE,C3,LRG1,A2M,LGALS3BP,RELN…
GO:BP	interleukin-1-mediated signaling pathway	GO:0070498	0.0103831	1.98367	105	217	9	18117	PSMA7,PSMB6,PSMA3,PSMA1,PSMA5,PSME1,PSMB5,PSMA6,PSMB4
GO:BP	reproductive system development	GO:0061458	0.0105569	1.97646	432	217	18	18117	HSP90AB1,IDH1,KRT19,RBP4,PSAP,HSPA5,C3,SERPINA5,SERPINF1,AFP,PRDX3,KRT8,SOD1,IGF2,NASP,SPP1,ICAM1,CTSB
GO:BP	intracellular transport	GO:0046907	0.0108362	1.96512	1767	217	43	18117	RAN,CTSC,SPTAN1,RPSA,HSPA4,HSP90AB1,HSPD1,IDH1,HSP90AA1,RPLP2,HSPA8,TUBA1B,ACTN4,CLTC,HSP90B1,APP,TUBB,YWHAE,YWHAZ,SPTBN1,F10,APOE,HSPA5,PROC,F2,CALR,PROS1,CLU,SERPINA1,PCSK9,AGT,F5,SSB,RPLP0,HSPA9,SOD1,RPL12,ECH1,KPNB1,NPM1,NUCB1,CSE1L,LMNA
GO:BP	regulation of cell morphogenesis	GO:0022604	0.0109546	1.9604	309	217	15	18117	FBLN1,ALDOA,ACTN4,FGA,P4HB,FGG,FN1,F2,CALR,RELN,APOA1,DAG1,CFL1,FGB,ICAM1
GO:BP	cellular ketone metabolic process	GO:0042180	0.0112045	1.95061	271	217	14	18117	AKR1C1,PSMA7,PSMB6,PSMA3,PSMA1,PSMA5,TPI1,APOA1,APOC3,AFP,PSME1,PSMB5,PSMA6,PSMB4
GO:BP	organonitrogen compound catabolic process	GO:1901565	0.0114441	1.94142	1358	217	36	18117	AGRN,GLUD1,UBA1,AHCY,CTSC,PSMA7,PSMB6,QPRT,HSP90AB1,CTSD,HSP90AA1,PSMA3,PSMA1,HSPA8,HSPA1B,CLTC,HSP90B1,PSMA5,CPN1,GPC3,APOB,APOE,C4BPA,HSPA5,SDC4,CLU,AMBP,NOTUM,PCSK9,GOT1,PSME1,PSMB5,PSMA6,CTSB,PSMB4,VCAN
GO:BP	protein processing	GO:0016485	0.0117081	1.93151	235	217	13	18117	PGK1,ENO1,FGA,CPN1,GSN,FGG,SERPINF2,THBS1,CPE,APOH,PCSK9,HP,FGB
GO:BP	lipid transport	GO:0006869	0.0119595	1.92229	480	217	19	18117	AKR1C1,RBP4,PSAP,APOB,APOE,APOM,APOC4-APOC2,APOA2,THBS1,SERPINA5,CLU,APOA1,APOC3,APOH,PCSK9,AGT,PLTP,DPYSL2,SPP1
GO:BP	purine ribonucleoside diphosphate metabolic process	GO:0009179	0.0122741	1.91101	136	217	10	18117	PGAM1,GPI,GAPDH,PGK1,LDHA,ENO1,ALDOA,PKM,TPI1,APP
GO:BP	purine nucleoside diphosphate metabolic process	GO:0009135	0.0122741	1.91101	136	217	10	18117	PGAM1,GPI,GAPDH,PGK1,LDHA,ENO1,ALDOA,PKM,TPI1,APP
GO:BP	regulation of lipid localization	GO:1905952	0.0124877	1.90352	201	217	12	18117	APOB,APOE,APOA2,THBS1,C3,APOA1,APOC3,PCSK9,AGT,PLTP,DPYSL2,SPP1
GO:BP	regulation of primary metabolic process	GO:0080090	0.0130212	1.88535	6053	217	104	18117	AGRN,TFRC,FASN,RAN,PGAM1,CTSC,XRCC5,GPI,GAPDH,PSMA7,PSMB6,HSP90AB1,HSPD1,NME2,IDH1,CTSD,HSP90AA1,FBLN1,HSPE1,ENO1,PSMA3,C5,PSMA1,HSPA8,HSPA1B,XRCC6,ACTN4,CLTC,PKM,HSP90B1,PSMA5,APP,YWHAE,TFPI,EEF2,YWHAZ,PSAP,VTN,SET,GPC3,SERPINA7,GSN,PTPRK,SERPINA3,APOB,APOE,C4BPA,SERPIND1,HSPA5,APOA2,C4B,FN1,F2,SERPINF2,CALR,ITIH2,THBS1,PROS1,C3,A2M,SERPINA5,SDC4,RELN,CLU,APOA1,SERPINA6,AHSG,DAG1,SERPINA1,AMBP,S…
GO:BP	regulation of macromolecule metabolic process	GO:0060255	0.0132249	1.87861	6603	217	111	18117	AGRN,TFRC,RAN,PGAM1,CTSC,RPSA,XRCC5,GPI,GAPDH,PSMA7,PSMB6,HSP90AB1,HSPD1,NME2,CTSD,HSP90AA1,FBLN1,HSPE1,RPLP2,ENO1,PSMA3,C5,PSMA1,HSPA8,HSPA1B,XRCC6,ACTN4,CLTC,PKM,HSP90B1,PSMA5,RBP4,APP,YWHAE,TFPI,EEF2,YWHAZ,VTN,SET,GPC3,SERPINA7,SPTBN1,GSN,PTPRK,SERPINA3,APOB,APOE,C4BPA,SERPIND1,HSPA5,APOA2,C4B,FN1,F2,SERPINF2,CALR,ACTG1,ITIH2,THBS1,PROS1,C3,A2M,SERPINA5,SDC4,RELN,CLU,APOA1,SERPINA6,AHSG,DAG1,S…
GO:BP	lipid localization	GO:0010876	0.0136865	1.86371	530	217	20	18117	AKR1C1,RBP4,PSAP,APOB,APOE,APOM,APOC4-APOC2,APOA2,THBS1,C3,SERPINA5,CLU,APOA1,APOC3,APOH,PCSK9,AGT,PLTP,DPYSL2,SPP1
GO:BP	cell surface receptor signaling pathway	GO:0007166	0.0139466	1.85553	3210	217	65	18117	PSMA7,PSMB6,HSP90AB1,NME2,HSP90AA1,KRT19,TALDO1,PSMA3,C5,PSMA1,HSPA8,HSPA1B,ACTN4,CLTC,FGA,HSP90B1,PSMA5,APP,YWHAZ,VTN,P4HB,GPC3,SPTBN1,CDH2,PTPRK,FGG,APOE,HSPA5,FN1,F2,ACTG1,PDIA3,THBS1,CPE,C3,LRG1,RELN,APOA1,AHSG,AFP,NOTUM,VASN,TF,AGT,GOT1,CFL1,KRT8,PSME1,PSMB5,PSMA6,KRT18,RPLP0,HSPA9,IGFBP1,SOD1,MIF,FGB,YBX1,CRLF1,IGF2,ICAM1,LMNB1,LMNA,PSMB4,DKK1
GO:BP	negative regulation of very-low-density lipoprotein particle remodeling	GO:0010903	0.0146084	1.8354	4	217	3	18117	APOA2,APOA1,APOC3
GO:BP	positive regulation of amyloid fibril formation	GO:1905908	0.0146084	1.8354	4	217	3	18117	APP,APOE,CLU
GO:BP	establishment of protein localization	GO:0045184	0.0146605	1.83385	2035	217	47	18117	TFRC,GLUD1,RAN,RPSA,HSPA4,HSP90AB1,HSPD1,CLSTN1,IDH1,CTSD,HSP90AA1,RPLP2,PDIA4,HSPA8,ACTN4,CLTC,FGA,HSP90B1,RBP4,YWHAE,YWHAZ,SPTBN1,FGG,APOB,APOE,HSPA5,CALR,CLU,TF,AZGP1,AGT,KRT18,SSB,RPLP0,HSPA9,RPL12,ECH1,FGB,CCT8,KPNB1,CCT3,NASP,NPM1,NUCB1,CSE1L,LMNA,GDI2
GO:BP	ribonucleoside diphosphate metabolic process	GO:0009185	0.0149097	1.82653	139	217	10	18117	PGAM1,GPI,GAPDH,PGK1,LDHA,ENO1,ALDOA,PKM,TPI1,APP
GO:BP	protein import	GO:0017038	0.0152718	1.81611	205	217	12	18117	RAN,HSPA4,HSP90AB1,HSPD1,HSP90AA1,HSPA8,APOE,CLU,AGT,KPNB1,CSE1L,LMNA
GO:BP	'de novo' protein folding	GO:0006458	0.0163654	1.78607	40	217	6	18117	HSPD1,HSPE1,HSPA8,HSPA1B,HSPA5,HSPA9
GO:BP	positive regulation of metabolic process	GO:0009893	0.0166612	1.77829	3783	217	73	18117	AGRN,TFRC,FASN,CTSC,XRCC5,GPI,GAPDH,HSP90AB1,HSPD1,NME2,CTSD,HSP90AA1,PGK1,FBLN1,HSPE1,ENO1,C5,HSPA8,HSPA1B,XRCC6,ACTN4,PKM,RBP4,APP,EEF2,VTN,GPC3,SPTBN1,GSN,APOB,APOE,C4BPA,HSPA5,APOA2,FN1,F2,SERPINF2,CALR,ACTG1,THBS1,C3,SDC4,RELN,CLU,APOA1,DAG1,ORM2,ORM1,TF,PCSK9,AGT,PSME1,ACTN1,ILF3,CADM1,SOD1,MIF,YBX1,CRLF1,CCT8,CCT3,IGF2,HNRNPC,SPP1,NPM1,ICAM1,NCL,PGC,HNRNPK,LMNA,ACLY,FH,DKK1
GO:BP	chaperone-mediated protein folding	GO:0061077	0.0175896	1.75474	61	217	7	18117	HSPE1,PDIA4,HSPA8,HSPA1B,HSPA5,CLU,HSPA9
GO:BP	stimulatory C-type lectin receptor signaling pathway	GO:0002223	0.0176612	1.75298	112	217	9	18117	PSMA7,PSMB6,PSMA3,PSMA1,PSMA5,PSME1,PSMB5,PSMA6,PSMB4
GO:BP	regulation of signal transduction	GO:0009966	0.0178093	1.74935	3165	217	64	18117	TFRC,CTSC,PSMA7,PSMB6,HSP90AB1,HSP90AA1,FBLN1,ENO1,PSMA3,C5,PSMA1,PRDX1,HSPA1B,ACTN4,FGA,PSMA5,APP,YWHAZ,VTN,P4HB,GPC3,SPTBN1,CDH2,F10,FGG,APOE,HSPA5,FN1,F2,SERPINF2,CALR,PDIA3,THBS1,C3,LRG1,A2M,RELN,CLU,APOA1,AHSG,DAG1,AMBP,APOC3,NOTUM,VASN,TF,PCSK9,AGT,GOT1,PEBP1,PSME1,PSMB5,PSMA6,IGFBP1,SOD1,MIF,FGB,IGF2,ICAM1,HNRNPK,LMNA,PSMB4,GDI2,DKK1
GO:BP	regulation of apoptotic signaling pathway	GO:2001233	0.0179602	1.74569	363	217	16	18117	CTSC,ENO1,HSPA1B,FGA,P4HB,FGG,PDIA3,THBS1,CLU,AGT,SOD1,MIF,FGB,ICAM1,HNRNPK,LMNA
GO:BP	carbohydrate metabolic process	GO:0005975	0.018035	1.74388	635	217	22	18117	PGAM1,ALDH1A1,GPI,GAPDH,IDH1,PGK1,LDHA,TALDO1,ENO1,ALDOA,CLTC,PKM,MDH1,TKT,TPI1,RBP4,APP,GOT1,MDH2,UGDH,IGF2,FUCA2
GO:BP	supramolecular fiber organization	GO:0097435	0.0181702	1.74064	734	217	24	18117	SPTAN1,HSP90AB1,KRT19,HSPA8,ALDOA,HSPA1B,HSP90B1,TPM3,APP,SPTBN1,GSN,APOE,SERPINF2,ACTG1,SDC4,CLU,APOA1,TF,KRT9,CFL1,KRT8,ACTN1,KPNB1,ICAM1
GO:BP	negative regulation of cell cycle G2/M phase transition	GO:1902750	0.0189925	1.72142	113	217	9	18117	PSMA7,PSMB6,PSMA3,PSMA1,PSMA5,PSME1,PSMB5,PSMA6,PSMB4
GO:BP	phospholipid efflux	GO:0033700	0.0199808	1.69939	12	217	4	18117	APOE,APOA2,APOA1,APOC3
GO:BP	very-low-density lipoprotein particle remodeling	GO:0034372	0.0199808	1.69939	12	217	4	18117	APOE,APOA2,APOA1,APOC3
GO:BP	intracellular signal transduction	GO:0035556	0.0201432	1.69587	2772	217	58	18117	TFRC,SPTAN1,PSMA7,PSMB6,HSP90AB1,HSP90AA1,FBLN1,ENO1,PSMA3,C5,PSMA1,PRDX1,HSPA1B,ACTN4,FGA,PSMA5,APP,YWHAE,YWHAZ,P4HB,SPTBN1,CDH2,GSN,F10,FGG,APOE,FN1,F2,SERPINF2,CALR,THBS1,A2M,RELN,CLU,APOA1,DAG1,AMBP,APOC3,TF,AGT,PEBP1,CFL1,PSME1,PSMB5,PSMA6,CAP1,SOD1,MIF,FGB,KPNB1,PRKCSH,IGF2,ICAM1,HNRNPK,NUCB1,PSMB4,GDI2,DKK1
GO:BP	regulation of synapse organization	GO:0050807	0.0214717	1.66813	212	217	12	18117	AGRN,CLSTN1,HSPA8,APP,TUBB,YWHAZ,CDH2,CLSTN3,APOE,RELN,DAG1,CFL1
GO:BP	innate immune response activating cell surface receptor signaling pathway	GO:0002220	0.0219143	1.65927	115	217	9	18117	PSMA7,PSMB6,PSMA3,PSMA1,PSMA5,PSME1,PSMB5,PSMA6,PSMB4
GO:BP	positive regulation of substrate adhesion-dependent cell spreading	GO:1900026	0.0219242	1.65908	42	217	6	18117	FGA,P4HB,FGG,CALR,APOA1,FGB
GO:BP	negative regulation of nitrogen compound metabolic process	GO:0051172	0.0225695	1.64648	2518	217	54	18117	XRCC5,GPI,GAPDH,HSP90AB1,FBLN1,ENO1,C5,HSPA8,HSPA1B,XRCC6,CLTC,APP,YWHAE,TFPI,VTN,SET,GPC3,SERPINA7,PTPRK,SERPINA3,APOE,SERPIND1,C4B,F2,SERPINF2,CALR,ITIH2,THBS1,PROS1,C3,A2M,SERPINA5,CLU,SERPINA6,AHSG,SERPINA1,AMBP,SERPINF1,ITIH3,SERPINC1,AGT,PEBP1,PRDX3,ILF3,SERPINA11,YBX1,APLP2,IGF2,HNRNPC,NPM1,NCL,HNRNPK,SERPINA4,DKK1
GO:BP	amide transport	GO:0042886	0.0230129	1.63803	2007	217	46	18117	TFRC,GLUD1,RAN,RPSA,HSPA4,HSP90AB1,HSPD1,CLSTN1,IDH1,HSP90AA1,RPLP2,PDIA4,HSPA8,ACTN4,CLTC,FGA,HSP90B1,RBP4,YWHAE,YWHAZ,PSAP,SPTBN1,FGG,APOB,APOE,HSPA5,CALR,CLU,TF,AZGP1,AGT,PLTP,KRT18,SSB,RPLP0,HSPA9,RPL12,ECH1,FGB,KPNB1,NASP,NPM1,NUCB1,CSE1L,LMNA,GDI2
GO:BP	negative regulation of cellular metabolic process	GO:0031324	0.0234026	1.63074	2719	217	57	18117	XRCC5,GPI,GAPDH,HSP90AB1,HSPD1,FBLN1,ENO1,C5,HSPA8,HSPA1B,XRCC6,APP,YWHAE,TFPI,VTN,SET,GPC3,SERPINA7,PTPRK,SERPINA3,APOE,SERPIND1,C4B,F2,SERPINF2,CALR,ITIH2,THBS1,PROS1,C3,A2M,SERPINA5,CLU,SERPINA6,AHSG,SERPINA1,AMBP,SERPINF1,ITIH3,APOC3,SERPINC1,PCSK9,AGT,HP,PEBP1,PRDX3,ILF3,SERPINA11,YBX1,APLP2,IGF2,HNRNPC,NPM1,NCL,HNRNPK,SERPINA4,DKK1
GO:BP	innate immune response-activating signal transduction	GO:0002758	0.0235136	1.62868	116	217	9	18117	PSMA7,PSMB6,PSMA3,PSMA1,PSMA5,PSME1,PSMB5,PSMA6,PSMB4
GO:BP	regulation of cell communication	GO:0010646	0.0248183	1.60523	3543	217	69	18117	TFRC,GLUD1,CTSC,PSMA7,PSMB6,HSP90AB1,CLSTN1,HSP90AA1,FBLN1,ENO1,PSMA3,C5,PSMA1,PRDX1,HSPA1B,ACTN4,FGA,PSMA5,RBP4,APP,YWHAZ,VTN,P4HB,GPC3,SPTBN1,CDH2,CLSTN3,F10,FGG,APOE,HSPA5,FN1,F2,SERPINF2,CALR,PDIA3,THBS1,C3,LRG1,A2M,RELN,CLU,APOA1,AHSG,DAG1,AMBP,APOC3,NOTUM,VASN,TF,PCSK9,AGT,GOT1,PEBP1,PSME1,PSMB5,PSMA6,IGFBP1,SOD1,MIF,FGB,IGF2,SPP1,ICAM1,HNRNPK,LMNA,PSMB4,GDI2,DKK1
GO:BP	positive regulation of macromolecule metabolic process	GO:0010604	0.0273194	1.56353	3483	217	68	18117	AGRN,TFRC,CTSC,XRCC5,GPI,GAPDH,HSP90AB1,HSPD1,NME2,CTSD,HSP90AA1,FBLN1,HSPE1,ENO1,C5,HSPA8,HSPA1B,XRCC6,ACTN4,PKM,RBP4,APP,EEF2,VTN,GPC3,SPTBN1,GSN,APOB,APOE,C4BPA,HSPA5,APOA2,FN1,F2,SERPINF2,CALR,ACTG1,THBS1,C3,SDC4,RELN,CLU,DAG1,ORM2,ORM1,TF,PCSK9,AGT,PSME1,ACTN1,ILF3,CADM1,SOD1,MIF,YBX1,CRLF1,CCT8,CCT3,IGF2,HNRNPC,SPP1,NPM1,ICAM1,NCL,PGC,HNRNPK,LMNA,DKK1
GO:BP	protein localization to organelle	GO:0033365	0.027676	1.5579	1017	217	29	18117	TFRC,RAN,RPSA,HSPA4,XRCC5,HSP90AB1,HSPD1,IDH1,HSP90AA1,RPLP2,HSPA8,YWHAE,YWHAZ,HSPA5,F2,CALR,CLU,DAG1,AGT,SSB,RPLP0,RPL12,ECH1,YBX1,CCT8,KPNB1,CCT3,CSE1L,LMNA
GO:BP	regulation of Wnt signaling pathway	GO:0030111	0.0278277	1.55552	376	217	16	18117	PSMA7,PSMB6,PSMA3,PSMA1,PSMA5,APP,GPC3,CDH2,APOE,NOTUM,PSME1,PSMB5,PSMA6,IGFBP1,PSMB4,DKK1
GO:BP	regulation of tau-protein kinase activity	GO:1902947	0.0285904	1.54378	13	217	4	18117	HSP90AB1,HSP90AA1,CLU,DKK1
GO:BP	regulation of cytokine production	GO:0001817	0.0287236	1.54176	806	217	25	18117	XRCC5,GAPDH,HSP90AB1,HSPD1,HSP90AA1,FBLN1,C5,HSPA1B,XRCC6,APP,SPTBN1,APOA2,FN1,F2,SERPINF2,THBS1,C3,CLU,APOA1,ORM2,ORM1,AGT,CADM1,SOD1,MIF
GO:BP	response to oxidative stress	GO:0006979	0.0296283	1.52829	466	217	18	18117	ATRN,HSPD1,NME2,IDH1,LDHA,GSR,PRDX1,HSPA1B,APP,EEF2,P4HB,PTPRK,APOE,HP,PRDX3,PSMB5,SOD1,DHRS2
GO:BP	cholesterol efflux	GO:0033344	0.0298489	1.52507	66	217	7	18117	APOB,APOE,APOM,APOA2,APOA1,APOC3,PLTP
GO:BP	positive regulation of Wnt signaling pathway	GO:0030177	0.0303808	1.5174	184	217	11	18117	PSMA7,PSMB6,PSMA3,PSMA1,PSMA5,GPC3,PSME1,PSMB5,PSMA6,PSMB4,DKK1
GO:BP	pyruvate metabolic process	GO:0006090	0.0309516	1.50932	151	217	10	18117	PGAM1,GPI,GAPDH,PGK1,LDHA,ENO1,ALDOA,PKM,TPI1,APP
GO:BP	positive regulation of canonical Wnt signaling pathway	GO:0090263	0.0309516	1.50932	151	217	10	18117	PSMA7,PSMB6,PSMA3,PSMA1,PSMA5,GPC3,PSME1,PSMB5,PSMA6,PSMB4
GO:BP	negative regulation of signal transduction	GO:0009968	0.0318039	1.49752	1364	217	35	18117	PSMA7,PSMB6,FBLN1,ENO1,PSMA3,PSMA1,HSPA1B,FGA,PSMA5,GPC3,CDH2,FGG,APOE,HSPA5,CALR,THBS1,CLU,APOA1,AHSG,DAG1,AMBP,NOTUM,VASN,AGT,PEBP1,PSME1,PSMB5,PSMA6,IGFBP1,MIF,FGB,ICAM1,LMNA,PSMB4,DKK1
GO:BP	cytoskeleton organization	GO:0007010	0.0320583	1.49406	1423	217	36	18117	AGRN,RAN,SPTAN1,GAPDH,KRT19,TUBA1B,ALDOA,HSPA1B,CLTC,TUBB4B,HSP90B1,TPM3,TUBB,SPTBN1,GSN,FLNB,APOE,SERPINF2,CALR,ACTG1,SDC4,APOA1,DAG1,TF,KRT9,CFL1,KRT8,KRT18,CAP1,ACTN1,SOD1,DPYSL2,KPNB1,NPM1,ICAM1,LMNA
GO:BP	protein catabolic process	GO:0030163	0.0341999	1.46598	974	217	28	18117	UBA1,CTSC,PSMA7,PSMB6,HSP90AB1,CTSD,HSP90AA1,PSMA3,PSMA1,HSPA8,HSPA1B,CLTC,HSP90B1,PSMA5,GPC3,APOB,APOE,C4BPA,HSPA5,CLU,AMBP,NOTUM,PCSK9,PSME1,PSMB5,PSMA6,CTSB,PSMB4
GO:BP	response to hormone	GO:0009725	0.0348072	1.45833	921	217	27	18117	AKR1C1,GPI,HSPD1,NME2,IDH1,KRT19,LDHA,GGH,PKM,TFPI,CPN1,APOB,CALR,THBS1,APOA1,AHSG,DAG1,SERPINF1,PCSK9,AGT,GOT1,IGFBP1,FGB,IGF2,SPP1,ICAM1,CTSB
GO:BP	regulation of signaling	GO:0023051	0.0348433	1.45788	3578	217	69	18117	TFRC,GLUD1,CTSC,PSMA7,PSMB6,HSP90AB1,CLSTN1,HSP90AA1,FBLN1,ENO1,PSMA3,C5,PSMA1,PRDX1,HSPA1B,ACTN4,FGA,PSMA5,RBP4,APP,YWHAZ,VTN,P4HB,GPC3,SPTBN1,CDH2,CLSTN3,F10,FGG,APOE,HSPA5,FN1,F2,SERPINF2,CALR,PDIA3,THBS1,C3,LRG1,A2M,RELN,CLU,APOA1,AHSG,DAG1,AMBP,APOC3,NOTUM,VASN,TF,PCSK9,AGT,GOT1,PEBP1,PSME1,PSMB5,PSMA6,IGFBP1,SOD1,MIF,FGB,IGF2,SPP1,ICAM1,HNRNPK,LMNA,PSMB4,GDI2,DKK1
GO:BP	regulation of synapse structure or activity	GO:0050803	0.0356819	1.44755	223	217	12	18117	AGRN,CLSTN1,HSPA8,APP,TUBB,YWHAZ,CDH2,CLSTN3,APOE,RELN,DAG1,CFL1
GO:BP	purine-containing compound metabolic process	GO:0072521	0.0361734	1.44161	473	217	18	18117	FASN,RAN,AHCY,PGAM1,GPI,GAPDH,NME2,PGK1,LDHA,ENO1,ATIC,ALDOA,PKM,TPI1,APP,TTR,PAICS,ACLY
GO:BP	regulation of fibrinolysis	GO:0051917	0.0396512	1.40174	14	217	4	18117	F2,SERPINF2,THBS1,APOH
GO:BP	regulation of cholesterol esterification	GO:0010872	0.0396512	1.40174	14	217	4	18117	APOE,APOA2,APOA1,AGT
GO:BP	canonical Wnt signaling pathway	GO:0060070	0.0406369	1.39108	345	217	15	18117	PSMA7,PSMB6,PSMA3,PSMA1,PSMA5,GPC3,CDH2,APOE,NOTUM,PSME1,PSMB5,PSMA6,IGFBP1,PSMB4,DKK1
GO:BP	protein transport	GO:0015031	0.0422668	1.374	1929	217	44	18117	TFRC,GLUD1,RAN,RPSA,HSPA4,HSP90AB1,HSPD1,CLSTN1,IDH1,HSP90AA1,RPLP2,PDIA4,HSPA8,ACTN4,CLTC,FGA,HSP90B1,RBP4,YWHAE,YWHAZ,SPTBN1,FGG,APOB,APOE,HSPA5,CALR,CLU,TF,AZGP1,AGT,KRT18,SSB,RPLP0,HSPA9,RPL12,ECH1,FGB,KPNB1,NASP,NPM1,NUCB1,CSE1L,LMNA,GDI2
GO:BP	cell junction organization	GO:0034330	0.0428704	1.36784	722	217	23	18117	AGRN,CLSTN1,HSPA8,APP,TUBB,YWHAZ,CDH2,CLSTN3,PTPRK,APOE,FN1,LAMC1,ACTG1,THBS1,C3,SDC4,RELN,DAG1,AGT,CFL1,ACTN1,CADM1,DKK1
GO:BP	cellular component organization or biogenesis	GO:0071840	0.0443594	1.35301	6760	217	111	18117	AGRN,TFRC,RAN,CTSC,SPTAN1,RPSA,HSPA4,XRCC5,GAPDH,HSP90AB1,HSPD1,CLSTN1,NME2,IDH1,HSP90AA1,KRT19,FBLN1,ENO1,HSPA8,TUBA1B,ALDOA,HSPA1B,XRCC6,CLTC,TUBB4B,FGA,HSP90B1,TPM3,NID1,APP,TUBB,YWHAE,YWHAZ,VTN,SET,P4HB,GPC3,SPTBN1,CDH2,GSN,CLSTN3,FLNB,PTPRK,FGG,TTR,APOB,APOE,APOM,HSPA5,APOA2,FN1,F2,SERPINF2,CALR,LAMC1,ACTG1,THBS1,C3,A2M,SERPINA5,SDC4,RELN,CLU,APOA1,MATN3,DAG1,SERPINA1,KRT10,SERPINF1,APOC3,AL…
GO:BP	regulation of transport	GO:0051049	0.0448368	1.34837	1809	217	42	18117	GLUD1,RAN,HSP90AB1,HSPA8,CLIC1,ACTN4,FGA,RBP4,APP,YWHAE,YWHAZ,VTN,GPC3,CDH2,FGG,APOE,APOA2,C4B,F2,CALR,ACTG1,THBS1,C3,SDC4,RELN,CLU,APOA1,C2,AHSG,APOC3,TF,PCSK9,AGT,PLTP,SOD1,DPYSL2,FGB,SPP1,ICAM1,HNRNPK,NUCB1,DKK1
GO:BP	alcohol biosynthetic process	GO:0046165	0.0459122	1.33807	158	217	10	18117	ACAT2,FASN,RAN,APOB,APOE,APOA1,GOT1,SOD1,KPNB1,ACLY
GO:BP	regulation of cellular ketone metabolic process	GO:0010565	0.0497874	1.30288	194	217	11	18117	PSMA7,PSMB6,PSMA3,PSMA1,PSMA5,APOA1,APOC3,PSME1,PSMB5,PSMA6,PSMB4
GO:CC	extracellular exosome	GO:0070062	2.64929e-119	118.577	2176	217	173	18960	AGRN,TFRC,ACAT2,FASN,RAN,UBA1,AHCY,PGAM1,CTSC,SPTAN1,RPSA,ALDH1A1,AKR1C1,HSPA4,GPI,ATRN,GAPDH,PSMA7,PSMB6,QPRT,HSP90AB1,HSPD1,EEF1G,NME2,IDH1,CTSD,HSP90AA1,KRT19,PGK1,LDHA,FBLN1,HSPE1,TALDO1,RPLP2,GSR,ENO1,ATIC,PSMA3,PSAT1,C5,PSMA1,HSPA8,CLIC1,PRDX1,ALDOA,HSPA1B,ACTN4,GGH,CLTC,TUBB4B,PKM,MDH1,FGA,HSP90B1,TPM3,NID1,PSMA5,TKT,TPI1,RBP4,APP,TUBB,YWHAE,BTD,EEF2,YWHAZ,PSAP,VTN,P4HB,SERPINA7,SPTBN1,GSN…
GO:CC	extracellular vesicle	GO:1903561	6.66922e-118	117.176	2261	217	174	18960	AGRN,TFRC,ACAT2,FASN,RAN,UBA1,AHCY,PGAM1,CTSC,SPTAN1,RPSA,ALDH1A1,AKR1C1,HSPA4,GPI,ATRN,GAPDH,PSMA7,PSMB6,QPRT,HSP90AB1,HSPD1,EEF1G,NME2,IDH1,CTSD,HSP90AA1,KRT19,PGK1,LDHA,FBLN1,HSPE1,TALDO1,RPLP2,GSR,ENO1,ATIC,PSMA3,PSAT1,C5,PSMA1,HSPA8,CLIC1,PRDX1,ALDOA,HSPA1B,ACTN4,GGH,CLTC,TUBB4B,PKM,MDH1,FGA,HSP90B1,TPM3,NID1,PSMA5,TKT,TPI1,RBP4,APP,TUBB,YWHAE,BTD,EEF2,YWHAZ,PSAP,VTN,P4HB,SERPINA7,SPTBN1,GSN…
GO:CC	extracellular organelle	GO:0043230	7.7868e-118	117.109	2263	217	174	18960	AGRN,TFRC,ACAT2,FASN,RAN,UBA1,AHCY,PGAM1,CTSC,SPTAN1,RPSA,ALDH1A1,AKR1C1,HSPA4,GPI,ATRN,GAPDH,PSMA7,PSMB6,QPRT,HSP90AB1,HSPD1,EEF1G,NME2,IDH1,CTSD,HSP90AA1,KRT19,PGK1,LDHA,FBLN1,HSPE1,TALDO1,RPLP2,GSR,ENO1,ATIC,PSMA3,PSAT1,C5,PSMA1,HSPA8,CLIC1,PRDX1,ALDOA,HSPA1B,ACTN4,GGH,CLTC,TUBB4B,PKM,MDH1,FGA,HSP90B1,TPM3,NID1,PSMA5,TKT,TPI1,RBP4,APP,TUBB,YWHAE,BTD,EEF2,YWHAZ,PSAP,VTN,P4HB,SERPINA7,SPTBN1,GSN…
GO:CC	extracellular space	GO:0005615	2.53718e-111	110.596	3594	217	194	18960	AGRN,TFRC,ACAT2,FASN,RAN,UBA1,AHCY,PGAM1,CTSC,SPTAN1,RPSA,ALDH1A1,AKR1C1,HSPA4,GPI,ATRN,GAPDH,PSMA7,PSMB6,QPRT,HSP90AB1,HSPD1,EEF1G,NME2,IDH1,CTSD,HSP90AA1,KRT19,PGK1,LDHA,FBLN1,HSPE1,TALDO1,RPLP2,GSR,PDIA4,ENO1,ATIC,PSMA3,PSAT1,C5,PSMA1,HSPA8,CLIC1,PRDX1,ALDOA,HSPA1B,ACTN4,GGH,CLTC,TUBB4B,PKM,MDH1,FGA,HSP90B1,TPM3,NID1,PSMA5,TKT,TPI1,RBP4,APP,TUBB,YWHAE,BTD,TFPI,EEF2,YWHAZ,PSAP,VTN,CPN1,P4HB,SER…
GO:CC	extracellular region	GO:0005576	6.75296e-102	101.171	4567	217	201	18960	AGRN,TFRC,ACAT2,FASN,RAN,UBA1,AHCY,PGAM1,CTSC,SPTAN1,RPSA,ALDH1A1,AKR1C1,HSPA4,XRCC5,GPI,ATRN,GAPDH,PSMA7,PSMB6,QPRT,HSP90AB1,HSPD1,EEF1G,CLSTN1,NME2,IDH1,CTSD,HSP90AA1,KRT19,PGK1,LDHA,FBLN1,HSPE1,TALDO1,RPLP2,GSR,PDIA4,ENO1,ATIC,PSMA3,PSAT1,C5,PSMA1,HSPA8,CLIC1,PRDX1,ALDOA,HSPA1B,XRCC6,ACTN4,GGH,CLTC,TUBB4B,PKM,MDH1,FGA,HSP90B1,TPM3,NID1,PSMA5,TKT,TPI1,RBP4,APP,TUBB,YWHAE,BTD,TFPI,EEF2,YWHAZ,PSA…
GO:CC	vesicle	GO:0031982	1.84849e-84	83.7332	4055	217	182	18960	AGRN,TFRC,ACAT2,FASN,RAN,UBA1,AHCY,PGAM1,CTSC,SPTAN1,RPSA,ALDH1A1,AKR1C1,HSPA4,XRCC5,GPI,ATRN,GAPDH,PSMA7,PSMB6,QPRT,HSP90AB1,HSPD1,EEF1G,CLSTN1,NME2,IDH1,CTSD,HSP90AA1,KRT19,PGK1,LDHA,FBLN1,HSPE1,TALDO1,RPLP2,GSR,PDIA4,ENO1,ATIC,PSMA3,PSAT1,C5,PSMA1,HSPA8,CLIC1,PRDX1,ALDOA,HSPA1B,XRCC6,ACTN4,GGH,CLTC,TUBB4B,PKM,MDH1,FGA,HSP90B1,TPM3,NID1,PSMA5,TKT,TPI1,RBP4,APP,TUBB,YWHAE,BTD,EEF2,YWHAZ,PSAP,VTN…
GO:CC	vesicle lumen	GO:0031983	4.19434e-53	52.3773	326	217	60	18960	PGAM1,CTSC,SPTAN1,XRCC5,GPI,HSP90AB1,NME2,IDH1,CTSD,HSP90AA1,HSPA8,ALDOA,XRCC6,ACTN4,GGH,TUBB4B,PKM,FGA,PSMA5,APP,TUBB,EEF2,GSN,SERPINA3,FGG,TTR,APOB,FN1,SERPINF2,THBS1,PROS1,C3,LRG1,A2M,LGALS3BP,RNASET2,CLU,APOA1,AHSG,SERPINA1,ITIH3,ORM2,ALB,ORM1,APOH,TF,A1BG,F5,HP,CAP1,ACTN1,MIF,FGB,CCT8,KPNB1,IGF2,FUCA2,SERPINA4,GDI2,ACLY
GO:CC	secretory granule lumen	GO:0034774	3.46588e-52	51.4602	320	217	59	18960	PGAM1,CTSC,SPTAN1,XRCC5,GPI,HSP90AB1,NME2,IDH1,CTSD,HSP90AA1,HSPA8,ALDOA,XRCC6,ACTN4,GGH,TUBB4B,PKM,FGA,PSMA5,APP,TUBB,EEF2,GSN,SERPINA3,FGG,TTR,FN1,SERPINF2,THBS1,PROS1,C3,LRG1,A2M,LGALS3BP,RNASET2,CLU,APOA1,AHSG,SERPINA1,ITIH3,ORM2,ALB,ORM1,APOH,TF,A1BG,F5,HP,CAP1,ACTN1,MIF,FGB,CCT8,KPNB1,IGF2,FUCA2,SERPINA4,GDI2,ACLY
GO:CC	cytoplasmic vesicle lumen	GO:0060205	7.52119e-52	51.1237	324	217	59	18960	PGAM1,CTSC,SPTAN1,XRCC5,GPI,HSP90AB1,NME2,IDH1,CTSD,HSP90AA1,HSPA8,ALDOA,XRCC6,ACTN4,GGH,TUBB4B,PKM,FGA,PSMA5,APP,TUBB,EEF2,GSN,SERPINA3,FGG,TTR,FN1,SERPINF2,THBS1,PROS1,C3,LRG1,A2M,LGALS3BP,RNASET2,CLU,APOA1,AHSG,SERPINA1,ITIH3,ORM2,ALB,ORM1,APOH,TF,A1BG,F5,HP,CAP1,ACTN1,MIF,FGB,CCT8,KPNB1,IGF2,FUCA2,SERPINA4,GDI2,ACLY
GO:CC	blood microparticle	GO:0072562	2.2188e-39	38.6539	140	217	38	18960	TFRC,HSPA8,CLIC1,HSPA1B,FGA,YWHAZ,VTN,GSN,SERPINA3,FGG,APOE,C4BPA,APOA2,C4B,FN1,F2,SERPINF2,ACTG1,ITIH2,PROS1,C3,A2M,LGALS3BP,CLU,APOA1,AHSG,CPN2,AMBP,ORM2,SERPINC1,ALB,ORM1,TF,AGT,A1BG,HP,CP,FGB
GO:CC	endoplasmic reticulum lumen	GO:0005788	3.86233e-38	37.4132	307	217	48	18960	CTSC,PDIA4,FGA,HSP90B1,APP,P4HB,GPC3,CDH2,F10,FGG,APOB,APOE,SERPIND1,HSPA5,APOA2,FN1,PROC,F2,CALR,LAMC1,PDIA3,ITIH2,THBS1,C3,RNASET2,CLU,APOA1,AHSG,MATN3,DAG1,SERPINA1,AFP,NOTUM,SERPINC1,ALB,TF,PCSK9,F5,BPIFB2,CP,IGFBP1,LAMB1,APLP2,PRKCSH,SPP1,FUCA2,NUCB1,VCAN
GO:CC	secretory granule	GO:0030141	2.73118e-36	35.5636	851	217	68	18960	PGAM1,CTSC,SPTAN1,XRCC5,GPI,HSP90AB1,HSPD1,NME2,IDH1,CTSD,HSP90AA1,HSPA8,ALDOA,HSPA1B,XRCC6,ACTN4,GGH,TUBB4B,PKM,FGA,PSMA5,APP,TUBB,EEF2,PSAP,GSN,SERPINA3,FGG,TTR,FN1,SERPINF2,CALR,THBS1,PROS1,C3,LRG1,A2M,SERPINA5,LGALS3BP,RNASET2,CLU,APOA1,AHSG,SERPINA1,ITIH3,ORM2,ALB,ORM1,APOH,TF,A1BG,F5,HP,CAP1,ACTN1,SOD1,MIF,FGB,CCT8,KPNB1,APLP2,IGF2,FUCA2,CTSB,SERPINA4,GDI2,ACLY,APEH
GO:CC	collagen-containing extracellular matrix	GO:0062023	1.59495e-31	30.7973	421	217	48	18960	AGRN,CTSC,ATRN,CTSD,FBLN1,PKM,FGA,HSP90B1,NID1,PSAP,VTN,GPC3,CDH2,SERPINA3,FGG,APOE,FN1,F2,SERPINF2,CALR,LAMC1,ITIH2,THBS1,A2M,SERPINA5,LGALS3BP,CLU,APOA1,AHSG,MATN3,DAG1,SERPINA1,AMBP,SERPINF1,APOC3,ORM2,SERPINC1,ORM1,APOH,AZGP1,AGT,A1BG,FGL1,LAMB1,FGB,ICAM1,CTSB,VCAN
GO:CC	secretory vesicle	GO:0099503	2.45214e-31	30.6105	1020	217	68	18960	PGAM1,CTSC,SPTAN1,XRCC5,GPI,HSP90AB1,HSPD1,NME2,IDH1,CTSD,HSP90AA1,HSPA8,ALDOA,HSPA1B,XRCC6,ACTN4,GGH,TUBB4B,PKM,FGA,PSMA5,APP,TUBB,EEF2,PSAP,GSN,SERPINA3,FGG,TTR,FN1,SERPINF2,CALR,THBS1,PROS1,C3,LRG1,A2M,SERPINA5,LGALS3BP,RNASET2,CLU,APOA1,AHSG,SERPINA1,ITIH3,ORM2,ALB,ORM1,APOH,TF,A1BG,F5,HP,CAP1,ACTN1,SOD1,MIF,FGB,CCT8,KPNB1,APLP2,IGF2,FUCA2,CTSB,SERPINA4,GDI2,ACLY,APEH
GO:CC	extracellular matrix	GO:0031012	8.13886e-29	28.0894	562	217	51	18960	AGRN,CTSC,ATRN,CTSD,FBLN1,PKM,FGA,HSP90B1,NID1,PSAP,VTN,GPC3,CDH2,SERPINA3,FGG,APOE,FN1,F2,SERPINF2,CALR,LAMC1,ITIH2,THBS1,A2M,SERPINA5,LGALS3BP,RELN,CLU,APOA1,AHSG,MATN3,DAG1,SERPINA1,CPN2,AMBP,SERPINF1,APOC3,ORM2,SERPINC1,VASN,ORM1,APOH,AZGP1,AGT,A1BG,FGL1,LAMB1,FGB,ICAM1,CTSB,VCAN
GO:CC	external encapsulating structure	GO:0030312	8.87056e-29	28.052	563	217	51	18960	AGRN,CTSC,ATRN,CTSD,FBLN1,PKM,FGA,HSP90B1,NID1,PSAP,VTN,GPC3,CDH2,SERPINA3,FGG,APOE,FN1,F2,SERPINF2,CALR,LAMC1,ITIH2,THBS1,A2M,SERPINA5,LGALS3BP,RELN,CLU,APOA1,AHSG,MATN3,DAG1,SERPINA1,CPN2,AMBP,SERPINF1,APOC3,ORM2,SERPINC1,VASN,ORM1,APOH,AZGP1,AGT,A1BG,FGL1,LAMB1,FGB,ICAM1,CTSB,VCAN
GO:CC	cytoplasmic vesicle	GO:0031410	1.43233e-26	25.844	2424	217	94	18960	TFRC,FASN,RAN,UBA1,AHCY,PGAM1,CTSC,SPTAN1,XRCC5,GPI,HSP90AB1,HSPD1,CLSTN1,NME2,IDH1,CTSD,HSP90AA1,PDIA4,HSPA8,PRDX1,ALDOA,HSPA1B,XRCC6,ACTN4,GGH,CLTC,TUBB4B,PKM,FGA,HSP90B1,PSMA5,APP,TUBB,YWHAE,EEF2,YWHAZ,PSAP,P4HB,GSN,SERPINA3,FGG,TTR,APOB,APOE,HSPA5,APOA2,FN1,SERPINF2,CALR,ACTG1,PDIA3,THBS1,PROS1,CPE,C3,LRG1,A2M,SERPINA5,LGALS3BP,RNASET2,CLU,APOA1,AHSG,SERPINA1,SERPINF1,ITIH3,APOC3,ORM2,ALB,ORM…
GO:CC	intracellular vesicle	GO:0097708	1.62891e-26	25.7881	2428	217	94	18960	TFRC,FASN,RAN,UBA1,AHCY,PGAM1,CTSC,SPTAN1,XRCC5,GPI,HSP90AB1,HSPD1,CLSTN1,NME2,IDH1,CTSD,HSP90AA1,PDIA4,HSPA8,PRDX1,ALDOA,HSPA1B,XRCC6,ACTN4,GGH,CLTC,TUBB4B,PKM,FGA,HSP90B1,PSMA5,APP,TUBB,YWHAE,EEF2,YWHAZ,PSAP,P4HB,GSN,SERPINA3,FGG,TTR,APOB,APOE,HSPA5,APOA2,FN1,SERPINF2,CALR,ACTG1,PDIA3,THBS1,PROS1,CPE,C3,LRG1,A2M,SERPINA5,LGALS3BP,RNASET2,CLU,APOA1,AHSG,SERPINA1,SERPINF1,ITIH3,APOC3,ORM2,ALB,ORM…
GO:CC	platelet alpha granule lumen	GO:0031093	2.94793e-24	23.5305	66	217	22	18960	ALDOA,ACTN4,FGA,APP,SERPINA3,FGG,FN1,SERPINF2,THBS1,PROS1,A2M,CLU,AHSG,SERPINA1,ORM2,ALB,ORM1,A1BG,F5,ACTN1,FGB,IGF2
GO:CC	platelet alpha granule	GO:0031091	6.06268e-24	23.2173	90	217	24	18960	ALDOA,ACTN4,FGA,APP,SERPINA3,FGG,FN1,SERPINF2,THBS1,PROS1,A2M,SERPINA5,CLU,AHSG,SERPINA1,ORM2,ALB,ORM1,A1BG,F5,ACTN1,FGB,APLP2,IGF2
GO:CC	membrane-enclosed lumen	GO:0031974	8.12744e-24	23.09	5565	217	139	18960	AGRN,GLUD1,RAN,UBA1,PGAM1,CTSC,SPTAN1,RPSA,XRCC5,GPI,PSMA7,PSMB6,HSP90AB1,HSPD1,NME2,IDH1,CTSD,HSP90AA1,HSPE1,GSR,PDIA4,PSMA3,PSMA1,HSPA8,ALDOA,HSPA1B,XRCC6,ACTN4,GGH,TUBB4B,PKM,FGA,HSP90B1,PSMA5,TKT,APP,TUBB,BTD,EEF2,YWHAZ,PSAP,SET,P4HB,GPC3,SPTBN1,CDH2,GSN,F10,SERPINA3,FGG,TTR,APOB,APOE,SERPIND1,HSPA5,APOA2,FN1,PROC,F2,SERPINF2,CALR,LAMC1,PDIA3,ITIH2,THBS1,PROS1,C3,LRG1,A2M,LGALS3BP,SDC4,RNASET…
GO:CC	organelle lumen	GO:0043233	8.12744e-24	23.09	5565	217	139	18960	AGRN,GLUD1,RAN,UBA1,PGAM1,CTSC,SPTAN1,RPSA,XRCC5,GPI,PSMA7,PSMB6,HSP90AB1,HSPD1,NME2,IDH1,CTSD,HSP90AA1,HSPE1,GSR,PDIA4,PSMA3,PSMA1,HSPA8,ALDOA,HSPA1B,XRCC6,ACTN4,GGH,TUBB4B,PKM,FGA,HSP90B1,PSMA5,TKT,APP,TUBB,BTD,EEF2,YWHAZ,PSAP,SET,P4HB,GPC3,SPTBN1,CDH2,GSN,F10,SERPINA3,FGG,TTR,APOB,APOE,SERPIND1,HSPA5,APOA2,FN1,PROC,F2,SERPINF2,CALR,LAMC1,PDIA3,ITIH2,THBS1,PROS1,C3,LRG1,A2M,LGALS3BP,SDC4,RNASET…
GO:CC	endomembrane system	GO:0012505	1.19116e-23	22.924	4640	217	126	18960	AGRN,TFRC,GLUD1,FASN,RAN,UBA1,PGAM1,CTSC,SPTAN1,XRCC5,GPI,GAPDH,HSP90AB1,HSPD1,EEF1G,CLSTN1,NME2,IDH1,CTSD,HSP90AA1,PDIA4,HSPA8,CLIC1,ALDOA,HSPA1B,XRCC6,ACTN4,GGH,CLTC,TUBB4B,PKM,FGA,HSP90B1,PSMA5,TKT,APP,TUBB,TFPI,EEF2,PSAP,VTN,SET,P4HB,GPC3,CDH2,GSN,CLSTN3,F10,SERPINA3,FGG,TTR,APOB,APOE,SERPIND1,HSPA5,APOA2,FN1,PROC,F2,SERPINF2,CALR,LAMC1,PDIA3,ITIH2,THBS1,PROS1,CPE,C3,LRG1,A2M,SERPINA5,LGALS3B…
GO:CC	membrane-bounded organelle	GO:0043227	1.89155e-20	19.7232	12858	217	206	18960	AGRN,TFRC,GLUD1,ACAT2,FASN,RAN,UBA1,AHCY,PGAM1,CTSC,SPTAN1,RPSA,ALDH1A1,AKR1C1,HSPA4,XRCC5,GPI,ATRN,GAPDH,PSMA7,PSMB6,QPRT,HSP90AB1,HSPD1,EEF1G,CLSTN1,NME2,IDH1,CTSD,HSP90AA1,KRT19,PGK1,LDHA,FBLN1,HSPE1,TALDO1,RPLP2,GSR,PDIA4,ENO1,ATIC,PSMA3,PSAT1,C5,PSMA1,HSPA8,CLIC1,PRDX1,ALDOA,HSPA1B,XRCC6,ACTN4,GGH,CLTC,TUBB4B,PKM,MDH1,FGA,HSP90B1,TPM3,NID1,PSMA5,TKT,TPI1,RBP4,APP,TUBB,YWHAE,BTD,TFPI,EEF2,YWH…
GO:CC	ficolin-1-rich granule lumen	GO:1904813	2.56366e-20	19.5911	124	217	24	18960	PGAM1,GPI,HSP90AB1,NME2,IDH1,CTSD,HSP90AA1,HSPA8,ALDOA,HSPA1B,XRCC6,PKM,PSMA5,EEF2,GSN,LRG1,SERPINA1,A1BG,MIF,CCT8,KPNB1,CTSB,ACLY,APEH
GO:CC	vacuolar lumen	GO:0005775	1.09038e-16	15.9624	174	217	24	18960	AGRN,CTSC,CTSD,HSP90AA1,HSPA8,GGH,TUBB4B,TUBB,PSAP,GPC3,SERPINA3,TTR,APOB,C3,SDC4,RNASET2,ORM2,CAP1,CCT8,FUCA2,CTSB,GDI2,ACLY,VCAN
GO:CC	melanosome	GO:0042470	1.57191e-16	15.8036	105	217	20	18960	TFRC,FASN,RAN,AHCY,HSP90AB1,CTSD,HSP90AA1,PDIA4,HSPA8,PRDX1,GGH,CLTC,HSP90B1,YWHAE,YWHAZ,P4HB,HSPA5,PDIA3,SERPINF1,CTSB
GO:CC	pigment granule	GO:0048770	1.57191e-16	15.8036	105	217	20	18960	TFRC,FASN,RAN,AHCY,HSP90AB1,CTSD,HSP90AA1,PDIA4,HSPA8,PRDX1,GGH,CLTC,HSP90B1,YWHAE,YWHAZ,P4HB,HSPA5,PDIA3,SERPINF1,CTSB
GO:CC	ficolin-1-rich granule	GO:0101002	4.15121e-16	15.3818	184	217	24	18960	PGAM1,GPI,HSP90AB1,NME2,IDH1,CTSD,HSP90AA1,HSPA8,ALDOA,HSPA1B,XRCC6,PKM,PSMA5,EEF2,GSN,LRG1,SERPINA1,A1BG,MIF,CCT8,KPNB1,CTSB,ACLY,APEH
GO:CC	organelle	GO:0043226	1.52777e-14	13.8159	14008	217	207	18960	AGRN,TFRC,GLUD1,ACAT2,FASN,RAN,UBA1,AHCY,PGAM1,CTSC,SPTAN1,RPSA,ALDH1A1,AKR1C1,HSPA4,XRCC5,GPI,ATRN,GAPDH,PSMA7,PSMB6,QPRT,HSP90AB1,HSPD1,EEF1G,CLSTN1,NME2,IDH1,CTSD,HSP90AA1,KRT19,PGK1,LDHA,FBLN1,HSPE1,TALDO1,RPLP2,GSR,PDIA4,ENO1,ATIC,PSMA3,PSAT1,C5,PSMA1,HSPA8,TUBA1B,CLIC1,PRDX1,ALDOA,HSPA1B,XRCC6,ACTN4,GGH,CLTC,TUBB4B,PKM,MDH1,FGA,HSP90B1,TPM3,NID1,PSMA5,TKT,TPI1,RBP4,APP,TUBB,YWHAE,BTD,TFPI,E…
GO:CC	cytoplasm	GO:0005737	1.88956e-14	13.7236	11911	217	191	18960	AGRN,TFRC,GLUD1,ACAT2,FASN,RAN,UBA1,AHCY,PGAM1,CTSC,SPTAN1,RPSA,ALDH1A1,AKR1C1,HSPA4,XRCC5,GPI,ATRN,GAPDH,PSMA7,PSMB6,QPRT,HSP90AB1,HSPD1,EEF1G,CLSTN1,NME2,IDH1,CTSD,HSP90AA1,KRT19,PGK1,LDHA,HSPE1,TALDO1,RPLP2,GSR,PDIA4,ENO1,ATIC,PSMA3,PSAT1,PSMA1,HSPA8,TUBA1B,CLIC1,PRDX1,ALDOA,HSPA1B,XRCC6,ACTN4,GGH,CLTC,TUBB4B,PKM,MDH1,FGA,HSP90B1,TPM3,PSMA5,TKT,TPI1,RBP4,APP,TUBB,YWHAE,BTD,TFPI,EEF2,YWHAZ,PSAP…
GO:CC	cell surface	GO:0009986	6.62083e-14	13.1791	899	217	44	18960	TFRC,HSP90AB1,HSPD1,CLSTN1,HSP90AA1,GSR,PDIA4,ENO1,FGA,APP,TFPI,P4HB,GPC3,CDH2,CLSTN3,PTPRK,F10,FGG,HSPA5,F2,SERPINF2,CALR,PDIA3,THBS1,C3,SERPINA5,SDC4,CLU,APOA1,DAG1,KRT10,AMBP,VASN,APOH,TF,AZGP1,PCSK9,KRT18,MIF,FGB,CRLF1,ALCAM,ICAM1,CTSB
GO:CC	intracellular organelle lumen	GO:0070013	3.23762e-13	12.4898	5402	217	118	18960	AGRN,GLUD1,RAN,UBA1,CTSC,RPSA,XRCC5,GPI,PSMA7,PSMB6,HSP90AB1,HSPD1,IDH1,CTSD,HSP90AA1,HSPE1,GSR,PDIA4,PSMA3,PSMA1,HSPA8,HSPA1B,XRCC6,ACTN4,GGH,TUBB4B,FGA,HSP90B1,PSMA5,TKT,APP,TUBB,BTD,YWHAZ,PSAP,SET,P4HB,GPC3,SPTBN1,CDH2,F10,SERPINA3,FGG,TTR,APOB,APOE,SERPIND1,HSPA5,APOA2,FN1,PROC,F2,CALR,LAMC1,PDIA3,ITIH2,THBS1,PROS1,C3,SDC4,RNASET2,CLU,APOA1,AHSG,MATN3,DAG1,SERPINA1,AFP,ORM2,NOTUM,SERPINC1,ALB…
GO:CC	endoplasmic reticulum	GO:0005783	2.17772e-12	11.662	1982	217	64	18960	GLUD1,UBA1,CTSC,HSPD1,EEF1G,CLSTN1,PDIA4,HSPA1B,PKM,FGA,HSP90B1,TKT,APP,TFPI,VTN,SET,P4HB,GPC3,CDH2,CLSTN3,F10,FGG,APOB,APOE,SERPIND1,HSPA5,APOA2,FN1,PROC,F2,CALR,LAMC1,PDIA3,ITIH2,THBS1,PROS1,C3,RNASET2,CLU,APOA1,AHSG,MATN3,DAG1,SERPINA1,AFP,NOTUM,SERPINC1,ALB,TF,PCSK9,F5,BPIFB2,CP,RPLP0,IGFBP1,LAMB1,FGB,KPNB1,APLP2,PRKCSH,SPP1,FUCA2,NUCB1,VCAN
GO:CC	focal adhesion	GO:0005925	3.07381e-12	11.5123	420	217	29	18960	RPLP2,HSPA8,HSPA1B,ACTN4,CLTC,HSP90B1,YWHAE,YWHAZ,P4HB,CDH2,GSN,FLNB,HSPA5,CALR,ACTG1,PDIA3,SDC4,DAG1,CFL1,CAP1,ACTN1,RPLP0,HSPA9,RPL12,ALCAM,NPM1,ICAM1,HNRNPK,GDI2
GO:CC	high-density lipoprotein particle	GO:0034364	3.7728e-12	11.4233	29	217	11	18960	APOB,APOE,APOM,APOC4-APOC2,APOA2,CLU,APOA1,APOC3,SAA4,APOH,PLTP
GO:CC	cell-substrate junction	GO:0030055	4.71284e-12	11.3267	427	217	29	18960	RPLP2,HSPA8,HSPA1B,ACTN4,CLTC,HSP90B1,YWHAE,YWHAZ,P4HB,CDH2,GSN,FLNB,HSPA5,CALR,ACTG1,PDIA3,SDC4,DAG1,CFL1,CAP1,ACTN1,RPLP0,HSPA9,RPL12,ALCAM,NPM1,ICAM1,HNRNPK,GDI2
GO:CC	fibrinogen complex	GO:0005577	7.0621e-11	10.1511	8	217	7	18960	FGA,FGG,FN1,SERPINF2,THBS1,FGL1,FGB
GO:CC	lipoprotein particle	GO:1990777	1.19916e-10	9.92112	38	217	11	18960	APOB,APOE,APOM,APOC4-APOC2,APOA2,CLU,APOA1,APOC3,SAA4,APOH,PLTP
GO:CC	plasma lipoprotein particle	GO:0034358	1.19916e-10	9.92112	38	217	11	18960	APOB,APOE,APOM,APOC4-APOC2,APOA2,CLU,APOA1,APOC3,SAA4,APOH,PLTP
GO:CC	protein-lipid complex	GO:0032994	3.0554e-10	9.51493	41	217	11	18960	APOB,APOE,APOM,APOC4-APOC2,APOA2,CLU,APOA1,APOC3,SAA4,APOH,PLTP
GO:CC	azurophil granule lumen	GO:0035578	8.14658e-10	9.08902	91	217	14	18960	CTSC,GGH,TUBB4B,TUBB,SERPINA3,TTR,C3,RNASET2,ORM2,CAP1,CCT8,FUCA2,GDI2,ACLY
GO:CC	anchoring junction	GO:0070161	1.0279e-08	7.98805	836	217	35	18960	UBA1,RPLP2,HSPA8,HSPA1B,ACTN4,CLTC,HSP90B1,APP,YWHAE,YWHAZ,P4HB,CDH2,GSN,FLNB,PTPRK,HSPA5,CALR,ACTG1,PDIA3,SDC4,DAG1,CFL1,KRT8,KRT18,CAP1,ACTN1,RPLP0,CADM1,HSPA9,RPL12,ALCAM,NPM1,ICAM1,HNRNPK,GDI2
GO:CC	lysosome	GO:0005764	1.33097e-08	7.87583	712	217	32	18960	AGRN,UBA1,CTSC,HSP90AB1,CTSD,HSP90AA1,HSPA8,GGH,CLTC,TUBB4B,TUBB,PSAP,GPC3,SERPINA3,TTR,APOB,C3,SDC4,RNASET2,ORM2,VASN,PCSK9,CP,GOT1,CAP1,SOD1,CCT8,FUCA2,CTSB,GDI2,ACLY,VCAN
GO:CC	lytic vacuole	GO:0000323	1.33097e-08	7.87583	712	217	32	18960	AGRN,UBA1,CTSC,HSP90AB1,CTSD,HSP90AA1,HSPA8,GGH,CLTC,TUBB4B,TUBB,PSAP,GPC3,SERPINA3,TTR,APOB,C3,SDC4,RNASET2,ORM2,VASN,PCSK9,CP,GOT1,CAP1,SOD1,CCT8,FUCA2,CTSB,GDI2,ACLY,VCAN
GO:CC	triglyceride-rich plasma lipoprotein particle	GO:0034385	1.76835e-08	7.75243	21	217	8	18960	APOB,APOE,APOM,APOC4-APOC2,APOA2,APOA1,APOC3,APOH
GO:CC	very-low-density lipoprotein particle	GO:0034361	1.76835e-08	7.75243	21	217	8	18960	APOB,APOE,APOM,APOC4-APOC2,APOA2,APOA1,APOC3,APOH
GO:CC	chylomicron	GO:0042627	2.85769e-08	7.54399	14	217	7	18960	APOB,APOE,APOC4-APOC2,APOA2,APOA1,APOC3,APOH
GO:CC	proteasome core complex	GO:0005839	4.17785e-08	7.37905	23	217	8	18960	PSMA7,PSMB6,PSMA3,PSMA1,PSMA5,PSMB5,PSMA6,PSMB4
GO:CC	azurophil granule	GO:0042582	1.07669e-07	6.96791	154	217	15	18960	CTSC,GGH,TUBB4B,TUBB,PSAP,SERPINA3,TTR,C3,RNASET2,ORM2,CAP1,CCT8,FUCA2,GDI2,ACLY
GO:CC	primary lysosome	GO:0005766	1.07669e-07	6.96791	154	217	15	18960	CTSC,GGH,TUBB4B,TUBB,PSAP,SERPINA3,TTR,C3,RNASET2,ORM2,CAP1,CCT8,FUCA2,GDI2,ACLY
GO:CC	cytosol	GO:0005829	1.08501e-07	6.96457	5303	217	104	18960	ACAT2,FASN,RAN,UBA1,AHCY,PGAM1,SPTAN1,RPSA,ALDH1A1,AKR1C1,HSPA4,XRCC5,GPI,GAPDH,PSMA7,PSMB6,QPRT,HSP90AB1,HSPD1,EEF1G,NME2,IDH1,HSP90AA1,KRT19,PGK1,LDHA,TALDO1,RPLP2,GSR,ENO1,ATIC,PSMA3,PSAT1,PSMA1,HSPA8,PRDX1,ALDOA,HSPA1B,XRCC6,ACTN4,GGH,CLTC,TUBB4B,PKM,MDH1,HSP90B1,TPM3,PSMA5,TKT,TPI1,RBP4,APP,YWHAE,EEF2,YWHAZ,SET,P4HB,SPTBN1,GSN,FLNB,PAICS,APOB,HSPA5,APOA2,CALR,ACTG1,A2M,CLU,APOA1,DAG1,KRT10,A…
GO:CC	vacuole	GO:0005773	3.43959e-07	6.46349	810	217	32	18960	AGRN,UBA1,CTSC,HSP90AB1,CTSD,HSP90AA1,HSPA8,GGH,CLTC,TUBB4B,TUBB,PSAP,GPC3,SERPINA3,TTR,APOB,C3,SDC4,RNASET2,ORM2,VASN,PCSK9,CP,GOT1,CAP1,SOD1,CCT8,FUCA2,CTSB,GDI2,ACLY,VCAN
GO:CC	endocytic vesicle lumen	GO:0071682	6.08866e-07	6.21548	20	217	7	18960	HSP90AA1,HSP90B1,APOB,APOE,CALR,APOA1,HP
GO:CC	cell periphery	GO:0071944	1.54986e-06	5.80971	6169	217	112	18960	AGRN,TFRC,FASN,CTSC,SPTAN1,RPSA,XRCC5,GPI,ATRN,GAPDH,HSP90AB1,HSPD1,CLSTN1,NME2,CTSD,HSP90AA1,KRT19,FBLN1,GSR,ENO1,ATIC,C5,HSPA8,CLIC1,HSPA1B,CLTC,PKM,FGA,HSP90B1,NID1,APP,YWHAE,TFPI,EEF2,PSAP,VTN,P4HB,GPC3,SPTBN1,CDH2,GSN,CLSTN3,FLNB,PTPRK,F10,SERPINA3,FGG,APOB,APOE,C4BPA,HSPA5,C4B,FN1,F2,SERPINF2,CALR,LAMC1,ACTG1,ITIH2,THBS1,PROS1,CPE,C3,A2M,SERPINA5,LGALS3BP,SDC4,RELN,CLU,APOA1,AHSG,MATN3,DAG1…
GO:CC	spherical high-density lipoprotein particle	GO:0034366	3.89827e-06	5.40913	8	217	5	18960	APOM,APOA2,CLU,APOA1,APOC3
GO:CC	lysosomal lumen	GO:0043202	5.49434e-06	5.26008	97	217	11	18960	AGRN,CTSD,HSP90AA1,HSPA8,PSAP,GPC3,APOB,SDC4,RNASET2,CTSB,VCAN
GO:CC	proteasome core complex, alpha-subunit complex	GO:0019773	1.7217e-05	4.76404	10	217	5	18960	PSMA7,PSMA3,PSMA1,PSMA5,PSMA6
GO:CC	external side of plasma membrane	GO:0009897	2.00572e-05	4.69773	408	217	20	18960	TFRC,GSR,FGA,P4HB,F10,FGG,F2,CALR,THBS1,SERPINA5,DAG1,TF,AZGP1,PCSK9,KRT18,FGB,CRLF1,ALCAM,ICAM1,CTSB
GO:CC	proteasome complex	GO:0000502	2.29148e-05	4.63988	66	217	9	18960	PSMA7,PSMB6,PSMA3,PSMA1,PSMA5,PSME1,PSMB5,PSMA6,PSMB4
GO:CC	intermediate-density lipoprotein particle	GO:0034363	3.15716e-05	4.5007	5	217	4	18960	APOB,APOE,APOA1,APOC3
GO:CC	endopeptidase complex	GO:1905369	4.96555e-05	4.30403	72	217	9	18960	PSMA7,PSMB6,PSMA3,PSMA1,PSMA5,PSME1,PSMB5,PSMA6,PSMB4
GO:CC	tertiary granule lumen	GO:1904724	7.57538e-05	4.1206	55	217	8	18960	SPTAN1,IDH1,CTSD,ALDOA,GGH,LRG1,ORM1,HP
GO:CC	Golgi lumen	GO:0005796	7.6737e-05	4.115	99	217	10	18960	AGRN,APP,GPC3,F10,PROC,F2,PROS1,SDC4,DAG1,VCAN
GO:CC	protein-containing complex	GO:0032991	8.21179e-05	4.08556	5548	217	99	18960	TFRC,RAN,SPTAN1,RPSA,XRCC5,GAPDH,PSMA7,PSMB6,QPRT,HSP90AB1,HSPD1,HSP90AA1,KRT19,RPLP2,ENO1,PSMA3,C5,PSMA1,HSPA8,CLIC1,HSPA1B,XRCC6,ACTN4,CLTC,PKM,FGA,HSP90B1,TPM3,PSMA5,RBP4,APP,TUBB,YWHAE,EEF2,VTN,SET,P4HB,SPTBN1,CDH2,GSN,CLSTN3,FGG,TTR,APOB,APOE,APOM,APOC4-APOC2,HSPA5,APOA2,FN1,SERPINF2,CALR,LAMC1,ACTG1,PDIA3,THBS1,C3,SERPINA5,CLU,APOA1,DAG1,APOC3,SAA4,ALB,APOH,TF,PCSK9,HP,PLTP,PRDX3,KRT8,PSME1…
GO:CC	low-density lipoprotein particle	GO:0034362	0.000131758	3.88022	14	217	5	18960	APOB,APOE,APOM,APOC4-APOC2,APOA1
GO:CC	specific granule lumen	GO:0035580	0.000172746	3.76259	61	217	8	18960	SPTAN1,CTSD,GGH,LRG1,ORM2,ORM1,HP,KPNB1
GO:CC	cell junction	GO:0030054	0.000338823	3.47003	2105	217	49	18960	AGRN,UBA1,PSMA7,CLSTN1,RPLP2,PSMA3,HSPA8,HSPA1B,ACTN4,CLTC,FGA,HSP90B1,APP,YWHAE,EEF2,YWHAZ,P4HB,SPTBN1,CDH2,GSN,CLSTN3,FLNB,PTPRK,APOE,HSPA5,C4B,CALR,ACTG1,PDIA3,SDC4,CLU,DAG1,GOT1,CFL1,KRT8,KRT18,CAP1,ACTN1,RPLP0,CADM1,HSPA9,RPL12,DPYSL2,FGB,ALCAM,NPM1,ICAM1,HNRNPK,GDI2
GO:CC	intracellular anatomical structure	GO:0005622	0.00050172	3.29954	14790	217	196	18960	AGRN,TFRC,GLUD1,ACAT2,FASN,RAN,UBA1,AHCY,PGAM1,CTSC,SPTAN1,RPSA,ALDH1A1,AKR1C1,HSPA4,XRCC5,GPI,ATRN,GAPDH,PSMA7,PSMB6,QPRT,HSP90AB1,HSPD1,EEF1G,CLSTN1,NME2,IDH1,CTSD,HSP90AA1,KRT19,PGK1,LDHA,HSPE1,TALDO1,RPLP2,GSR,PDIA4,ENO1,ATIC,PSMA3,PSAT1,PSMA1,HSPA8,TUBA1B,CLIC1,PRDX1,ALDOA,HSPA1B,XRCC6,ACTN4,GGH,CLTC,TUBB4B,PKM,MDH1,FGA,HSP90B1,TPM3,PSMA5,TKT,TPI1,RBP4,APP,TUBB,YWHAE,BTD,TFPI,EEF2,YWHAZ,PSAP…
GO:CC	discoidal high-density lipoprotein particle	GO:0034365	0.000564423	3.2484	3	217	3	18960	APOE,APOM,APOA1
GO:CC	peptidase complex	GO:1905368	0.000596687	3.22425	96	217	9	18960	PSMA7,PSMB6,PSMA3,PSMA1,PSMA5,PSME1,PSMB5,PSMA6,PSMB4
GO:CC	basement membrane	GO:0005604	0.00065125	3.18625	97	217	9	18960	AGRN,ATRN,FBLN1,NID1,FN1,LAMC1,DAG1,SERPINF1,LAMB1
GO:CC	side of membrane	GO:0098552	0.00103028	2.98705	619	217	22	18960	TFRC,GSR,HSPA8,FGA,P4HB,F10,FGG,F2,CALR,THBS1,SERPINA5,DAG1,TF,AZGP1,PCSK9,KRT18,FGB,CRLF1,ALCAM,ICAM1,CTSB,NUCB1
GO:CC	intracellular membrane-bounded organelle	GO:0043231	0.00157223	2.80348	11296	217	161	18960	AGRN,TFRC,GLUD1,ACAT2,FASN,RAN,UBA1,AHCY,CTSC,SPTAN1,RPSA,HSPA4,XRCC5,GPI,GAPDH,PSMA7,PSMB6,HSP90AB1,HSPD1,EEF1G,CLSTN1,NME2,IDH1,CTSD,HSP90AA1,LDHA,HSPE1,TALDO1,GSR,PDIA4,ENO1,PSMA3,PSMA1,HSPA8,CLIC1,PRDX1,ALDOA,HSPA1B,XRCC6,ACTN4,GGH,CLTC,TUBB4B,PKM,FGA,HSP90B1,PSMA5,TKT,TPI1,APP,TUBB,YWHAE,BTD,TFPI,EEF2,YWHAZ,PSAP,VTN,SET,P4HB,GPC3,SPTBN1,CDH2,GSN,CLSTN3,FLNB,PTPRK,F10,SERPINA3,FGG,TTR,APOB,AP…
GO:CC	perinuclear region of cytoplasm	GO:0048471	0.00488903	2.31078	735	217	23	18960	TFRC,GAPDH,HSP90AB1,NME2,HSP90AA1,HSPA8,CLIC1,HSPA1B,ACTN4,HSP90B1,APP,SET,GSN,CALR,CLU,SERPINF1,TF,PCSK9,KRT18,LAMB1,SPP1,CTSB,LMNA
GO:CC	myofibril	GO:0030016	0.00570478	2.24376	231	217	12	18960	KRT19,ENO1,ALDOA,TPM3,SPTBN1,FLNB,ACTG1,SDC4,DAG1,KRT8,PSMA6,ACTN1
GO:CC	platelet dense granule lumen	GO:0031089	0.00582809	2.23447	14	217	4	18960	LGALS3BP,ITIH3,APOH,SERPINA4
GO:CC	contractile fiber	GO:0043292	0.00834071	2.0788	240	217	12	18960	KRT19,ENO1,ALDOA,TPM3,SPTBN1,FLNB,ACTG1,SDC4,DAG1,KRT8,PSMA6,ACTN1
GO:CC	intracellular organelle	GO:0043229	0.0145365	1.83754	12491	217	170	18960	AGRN,TFRC,GLUD1,ACAT2,FASN,RAN,UBA1,AHCY,CTSC,SPTAN1,RPSA,HSPA4,XRCC5,GPI,GAPDH,PSMA7,PSMB6,HSP90AB1,HSPD1,EEF1G,CLSTN1,NME2,IDH1,CTSD,HSP90AA1,KRT19,LDHA,HSPE1,TALDO1,RPLP2,GSR,PDIA4,ENO1,PSMA3,PSMA1,HSPA8,TUBA1B,CLIC1,PRDX1,ALDOA,HSPA1B,XRCC6,ACTN4,GGH,CLTC,TUBB4B,PKM,MDH1,FGA,HSP90B1,TPM3,PSMA5,TKT,TPI1,APP,TUBB,YWHAE,BTD,TFPI,EEF2,YWHAZ,PSAP,VTN,SET,P4HB,GPC3,SPTBN1,CDH2,GSN,CLSTN3,FLNB,PTPRK…
GO:CC	costamere	GO:0043034	0.0215748	1.66605	19	217	4	18960	KRT19,SDC4,DAG1,KRT8
GO:CC	supramolecular fiber	GO:0099512	0.0276126	1.55889	993	217	26	18960	NME2,KRT19,FBLN1,ENO1,TUBA1B,ALDOA,CLTC,TUBB4B,TPM3,TUBB,SPTBN1,FLNB,ACTG1,SDC4,DAG1,KRT10,KRT9,KRT8,PSMA6,KRT18,ACTN1,DPYSL2,CCT8,CCT3,LMNB1,LMNA
GO:CC	supramolecular polymer	GO:0099081	0.031473	1.50206	1001	217	26	18960	NME2,KRT19,FBLN1,ENO1,TUBA1B,ALDOA,CLTC,TUBB4B,TPM3,TUBB,SPTBN1,FLNB,ACTG1,SDC4,DAG1,KRT10,KRT9,KRT8,PSMA6,KRT18,ACTN1,DPYSL2,CCT8,CCT3,LMNB1,LMNA
GO:CC	platelet dense granule	GO:0042827	0.032721	1.48517	21	217	4	18960	LGALS3BP,ITIH3,APOH,SERPINA4
GO:CC	supramolecular complex	GO:0099080	0.0424733	1.37188	1323	217	31	18960	NME2,KRT19,FBLN1,ENO1,TUBA1B,ALDOA,CLTC,TUBB4B,TPM3,TUBB,SPTBN1,FLNB,ACTG1,SDC4,DAG1,KRT10,KRT9,KRT8,PSMA6,KRT18,ACTN1,RPLP0,DPYSL2,YBX1,CCT8,KPNB1,CCT3,NCL,HNRNPK,LMNB1,LMNA
GO:CC	extracellular exosome	GO:0070062	2.64929e-119	118.577	2176	217	173	18960	AGRN,TFRC,ACAT2,FASN,RAN,UBA1,AHCY,PGAM1,CTSC,SPTAN1,RPSA,ALDH1A1,AKR1C1,HSPA4,GPI,ATRN,GAPDH,PSMA7,PSMB6,QPRT,HSP90AB1,HSPD1,EEF1G,NME2,IDH1,CTSD,HSP90AA1,KRT19,PGK1,LDHA,FBLN1,HSPE1,TALDO1,RPLP2,GSR,ENO1,ATIC,PSMA3,PSAT1,C5,PSMA1,HSPA8,CLIC1,PRDX1,ALDOA,HSPA1B,ACTN4,GGH,CLTC,TUBB4B,PKM,MDH1,FGA,HSP90B1,TPM3,NID1,PSMA5,TKT,TPI1,RBP4,APP,TUBB,YWHAE,BTD,EEF2,YWHAZ,PSAP,VTN,P4HB,SERPINA7,SPTBN1,GSN…
GO:CC	extracellular vesicle	GO:1903561	6.66922e-118	117.176	2261	217	174	18960	AGRN,TFRC,ACAT2,FASN,RAN,UBA1,AHCY,PGAM1,CTSC,SPTAN1,RPSA,ALDH1A1,AKR1C1,HSPA4,GPI,ATRN,GAPDH,PSMA7,PSMB6,QPRT,HSP90AB1,HSPD1,EEF1G,NME2,IDH1,CTSD,HSP90AA1,KRT19,PGK1,LDHA,FBLN1,HSPE1,TALDO1,RPLP2,GSR,ENO1,ATIC,PSMA3,PSAT1,C5,PSMA1,HSPA8,CLIC1,PRDX1,ALDOA,HSPA1B,ACTN4,GGH,CLTC,TUBB4B,PKM,MDH1,FGA,HSP90B1,TPM3,NID1,PSMA5,TKT,TPI1,RBP4,APP,TUBB,YWHAE,BTD,EEF2,YWHAZ,PSAP,VTN,P4HB,SERPINA7,SPTBN1,GSN…
GO:CC	extracellular organelle	GO:0043230	7.7868e-118	117.109	2263	217	174	18960	AGRN,TFRC,ACAT2,FASN,RAN,UBA1,AHCY,PGAM1,CTSC,SPTAN1,RPSA,ALDH1A1,AKR1C1,HSPA4,GPI,ATRN,GAPDH,PSMA7,PSMB6,QPRT,HSP90AB1,HSPD1,EEF1G,NME2,IDH1,CTSD,HSP90AA1,KRT19,PGK1,LDHA,FBLN1,HSPE1,TALDO1,RPLP2,GSR,ENO1,ATIC,PSMA3,PSAT1,C5,PSMA1,HSPA8,CLIC1,PRDX1,ALDOA,HSPA1B,ACTN4,GGH,CLTC,TUBB4B,PKM,MDH1,FGA,HSP90B1,TPM3,NID1,PSMA5,TKT,TPI1,RBP4,APP,TUBB,YWHAE,BTD,EEF2,YWHAZ,PSAP,VTN,P4HB,SERPINA7,SPTBN1,GSN…
GO:CC	extracellular space	GO:0005615	2.53718e-111	110.596	3594	217	194	18960	AGRN,TFRC,ACAT2,FASN,RAN,UBA1,AHCY,PGAM1,CTSC,SPTAN1,RPSA,ALDH1A1,AKR1C1,HSPA4,GPI,ATRN,GAPDH,PSMA7,PSMB6,QPRT,HSP90AB1,HSPD1,EEF1G,NME2,IDH1,CTSD,HSP90AA1,KRT19,PGK1,LDHA,FBLN1,HSPE1,TALDO1,RPLP2,GSR,PDIA4,ENO1,ATIC,PSMA3,PSAT1,C5,PSMA1,HSPA8,CLIC1,PRDX1,ALDOA,HSPA1B,ACTN4,GGH,CLTC,TUBB4B,PKM,MDH1,FGA,HSP90B1,TPM3,NID1,PSMA5,TKT,TPI1,RBP4,APP,TUBB,YWHAE,BTD,TFPI,EEF2,YWHAZ,PSAP,VTN,CPN1,P4HB,SER…
GO:CC	extracellular region	GO:0005576	6.75296e-102	101.171	4567	217	201	18960	AGRN,TFRC,ACAT2,FASN,RAN,UBA1,AHCY,PGAM1,CTSC,SPTAN1,RPSA,ALDH1A1,AKR1C1,HSPA4,XRCC5,GPI,ATRN,GAPDH,PSMA7,PSMB6,QPRT,HSP90AB1,HSPD1,EEF1G,CLSTN1,NME2,IDH1,CTSD,HSP90AA1,KRT19,PGK1,LDHA,FBLN1,HSPE1,TALDO1,RPLP2,GSR,PDIA4,ENO1,ATIC,PSMA3,PSAT1,C5,PSMA1,HSPA8,CLIC1,PRDX1,ALDOA,HSPA1B,XRCC6,ACTN4,GGH,CLTC,TUBB4B,PKM,MDH1,FGA,HSP90B1,TPM3,NID1,PSMA5,TKT,TPI1,RBP4,APP,TUBB,YWHAE,BTD,TFPI,EEF2,YWHAZ,PSA…
GO:CC	vesicle	GO:0031982	1.84849e-84	83.7332	4055	217	182	18960	AGRN,TFRC,ACAT2,FASN,RAN,UBA1,AHCY,PGAM1,CTSC,SPTAN1,RPSA,ALDH1A1,AKR1C1,HSPA4,XRCC5,GPI,ATRN,GAPDH,PSMA7,PSMB6,QPRT,HSP90AB1,HSPD1,EEF1G,CLSTN1,NME2,IDH1,CTSD,HSP90AA1,KRT19,PGK1,LDHA,FBLN1,HSPE1,TALDO1,RPLP2,GSR,PDIA4,ENO1,ATIC,PSMA3,PSAT1,C5,PSMA1,HSPA8,CLIC1,PRDX1,ALDOA,HSPA1B,XRCC6,ACTN4,GGH,CLTC,TUBB4B,PKM,MDH1,FGA,HSP90B1,TPM3,NID1,PSMA5,TKT,TPI1,RBP4,APP,TUBB,YWHAE,BTD,EEF2,YWHAZ,PSAP,VTN…
GO:CC	vesicle lumen	GO:0031983	4.19434e-53	52.3773	326	217	60	18960	PGAM1,CTSC,SPTAN1,XRCC5,GPI,HSP90AB1,NME2,IDH1,CTSD,HSP90AA1,HSPA8,ALDOA,XRCC6,ACTN4,GGH,TUBB4B,PKM,FGA,PSMA5,APP,TUBB,EEF2,GSN,SERPINA3,FGG,TTR,APOB,FN1,SERPINF2,THBS1,PROS1,C3,LRG1,A2M,LGALS3BP,RNASET2,CLU,APOA1,AHSG,SERPINA1,ITIH3,ORM2,ALB,ORM1,APOH,TF,A1BG,F5,HP,CAP1,ACTN1,MIF,FGB,CCT8,KPNB1,IGF2,FUCA2,SERPINA4,GDI2,ACLY
GO:CC	secretory granule lumen	GO:0034774	3.46588e-52	51.4602	320	217	59	18960	PGAM1,CTSC,SPTAN1,XRCC5,GPI,HSP90AB1,NME2,IDH1,CTSD,HSP90AA1,HSPA8,ALDOA,XRCC6,ACTN4,GGH,TUBB4B,PKM,FGA,PSMA5,APP,TUBB,EEF2,GSN,SERPINA3,FGG,TTR,FN1,SERPINF2,THBS1,PROS1,C3,LRG1,A2M,LGALS3BP,RNASET2,CLU,APOA1,AHSG,SERPINA1,ITIH3,ORM2,ALB,ORM1,APOH,TF,A1BG,F5,HP,CAP1,ACTN1,MIF,FGB,CCT8,KPNB1,IGF2,FUCA2,SERPINA4,GDI2,ACLY
GO:CC	cytoplasmic vesicle lumen	GO:0060205	7.52119e-52	51.1237	324	217	59	18960	PGAM1,CTSC,SPTAN1,XRCC5,GPI,HSP90AB1,NME2,IDH1,CTSD,HSP90AA1,HSPA8,ALDOA,XRCC6,ACTN4,GGH,TUBB4B,PKM,FGA,PSMA5,APP,TUBB,EEF2,GSN,SERPINA3,FGG,TTR,FN1,SERPINF2,THBS1,PROS1,C3,LRG1,A2M,LGALS3BP,RNASET2,CLU,APOA1,AHSG,SERPINA1,ITIH3,ORM2,ALB,ORM1,APOH,TF,A1BG,F5,HP,CAP1,ACTN1,MIF,FGB,CCT8,KPNB1,IGF2,FUCA2,SERPINA4,GDI2,ACLY
GO:CC	blood microparticle	GO:0072562	2.2188e-39	38.6539	140	217	38	18960	TFRC,HSPA8,CLIC1,HSPA1B,FGA,YWHAZ,VTN,GSN,SERPINA3,FGG,APOE,C4BPA,APOA2,C4B,FN1,F2,SERPINF2,ACTG1,ITIH2,PROS1,C3,A2M,LGALS3BP,CLU,APOA1,AHSG,CPN2,AMBP,ORM2,SERPINC1,ALB,ORM1,TF,AGT,A1BG,HP,CP,FGB
GO:CC	endoplasmic reticulum lumen	GO:0005788	3.86233e-38	37.4132	307	217	48	18960	CTSC,PDIA4,FGA,HSP90B1,APP,P4HB,GPC3,CDH2,F10,FGG,APOB,APOE,SERPIND1,HSPA5,APOA2,FN1,PROC,F2,CALR,LAMC1,PDIA3,ITIH2,THBS1,C3,RNASET2,CLU,APOA1,AHSG,MATN3,DAG1,SERPINA1,AFP,NOTUM,SERPINC1,ALB,TF,PCSK9,F5,BPIFB2,CP,IGFBP1,LAMB1,APLP2,PRKCSH,SPP1,FUCA2,NUCB1,VCAN
GO:CC	secretory granule	GO:0030141	2.73118e-36	35.5636	851	217	68	18960	PGAM1,CTSC,SPTAN1,XRCC5,GPI,HSP90AB1,HSPD1,NME2,IDH1,CTSD,HSP90AA1,HSPA8,ALDOA,HSPA1B,XRCC6,ACTN4,GGH,TUBB4B,PKM,FGA,PSMA5,APP,TUBB,EEF2,PSAP,GSN,SERPINA3,FGG,TTR,FN1,SERPINF2,CALR,THBS1,PROS1,C3,LRG1,A2M,SERPINA5,LGALS3BP,RNASET2,CLU,APOA1,AHSG,SERPINA1,ITIH3,ORM2,ALB,ORM1,APOH,TF,A1BG,F5,HP,CAP1,ACTN1,SOD1,MIF,FGB,CCT8,KPNB1,APLP2,IGF2,FUCA2,CTSB,SERPINA4,GDI2,ACLY,APEH
GO:CC	collagen-containing extracellular matrix	GO:0062023	1.59495e-31	30.7973	421	217	48	18960	AGRN,CTSC,ATRN,CTSD,FBLN1,PKM,FGA,HSP90B1,NID1,PSAP,VTN,GPC3,CDH2,SERPINA3,FGG,APOE,FN1,F2,SERPINF2,CALR,LAMC1,ITIH2,THBS1,A2M,SERPINA5,LGALS3BP,CLU,APOA1,AHSG,MATN3,DAG1,SERPINA1,AMBP,SERPINF1,APOC3,ORM2,SERPINC1,ORM1,APOH,AZGP1,AGT,A1BG,FGL1,LAMB1,FGB,ICAM1,CTSB,VCAN
GO:CC	secretory vesicle	GO:0099503	2.45214e-31	30.6105	1020	217	68	18960	PGAM1,CTSC,SPTAN1,XRCC5,GPI,HSP90AB1,HSPD1,NME2,IDH1,CTSD,HSP90AA1,HSPA8,ALDOA,HSPA1B,XRCC6,ACTN4,GGH,TUBB4B,PKM,FGA,PSMA5,APP,TUBB,EEF2,PSAP,GSN,SERPINA3,FGG,TTR,FN1,SERPINF2,CALR,THBS1,PROS1,C3,LRG1,A2M,SERPINA5,LGALS3BP,RNASET2,CLU,APOA1,AHSG,SERPINA1,ITIH3,ORM2,ALB,ORM1,APOH,TF,A1BG,F5,HP,CAP1,ACTN1,SOD1,MIF,FGB,CCT8,KPNB1,APLP2,IGF2,FUCA2,CTSB,SERPINA4,GDI2,ACLY,APEH
GO:CC	extracellular matrix	GO:0031012	8.13886e-29	28.0894	562	217	51	18960	AGRN,CTSC,ATRN,CTSD,FBLN1,PKM,FGA,HSP90B1,NID1,PSAP,VTN,GPC3,CDH2,SERPINA3,FGG,APOE,FN1,F2,SERPINF2,CALR,LAMC1,ITIH2,THBS1,A2M,SERPINA5,LGALS3BP,RELN,CLU,APOA1,AHSG,MATN3,DAG1,SERPINA1,CPN2,AMBP,SERPINF1,APOC3,ORM2,SERPINC1,VASN,ORM1,APOH,AZGP1,AGT,A1BG,FGL1,LAMB1,FGB,ICAM1,CTSB,VCAN
GO:CC	external encapsulating structure	GO:0030312	8.87056e-29	28.052	563	217	51	18960	AGRN,CTSC,ATRN,CTSD,FBLN1,PKM,FGA,HSP90B1,NID1,PSAP,VTN,GPC3,CDH2,SERPINA3,FGG,APOE,FN1,F2,SERPINF2,CALR,LAMC1,ITIH2,THBS1,A2M,SERPINA5,LGALS3BP,RELN,CLU,APOA1,AHSG,MATN3,DAG1,SERPINA1,CPN2,AMBP,SERPINF1,APOC3,ORM2,SERPINC1,VASN,ORM1,APOH,AZGP1,AGT,A1BG,FGL1,LAMB1,FGB,ICAM1,CTSB,VCAN
GO:CC	cytoplasmic vesicle	GO:0031410	1.43233e-26	25.844	2424	217	94	18960	TFRC,FASN,RAN,UBA1,AHCY,PGAM1,CTSC,SPTAN1,XRCC5,GPI,HSP90AB1,HSPD1,CLSTN1,NME2,IDH1,CTSD,HSP90AA1,PDIA4,HSPA8,PRDX1,ALDOA,HSPA1B,XRCC6,ACTN4,GGH,CLTC,TUBB4B,PKM,FGA,HSP90B1,PSMA5,APP,TUBB,YWHAE,EEF2,YWHAZ,PSAP,P4HB,GSN,SERPINA3,FGG,TTR,APOB,APOE,HSPA5,APOA2,FN1,SERPINF2,CALR,ACTG1,PDIA3,THBS1,PROS1,CPE,C3,LRG1,A2M,SERPINA5,LGALS3BP,RNASET2,CLU,APOA1,AHSG,SERPINA1,SERPINF1,ITIH3,APOC3,ORM2,ALB,ORM…
GO:CC	intracellular vesicle	GO:0097708	1.62891e-26	25.7881	2428	217	94	18960	TFRC,FASN,RAN,UBA1,AHCY,PGAM1,CTSC,SPTAN1,XRCC5,GPI,HSP90AB1,HSPD1,CLSTN1,NME2,IDH1,CTSD,HSP90AA1,PDIA4,HSPA8,PRDX1,ALDOA,HSPA1B,XRCC6,ACTN4,GGH,CLTC,TUBB4B,PKM,FGA,HSP90B1,PSMA5,APP,TUBB,YWHAE,EEF2,YWHAZ,PSAP,P4HB,GSN,SERPINA3,FGG,TTR,APOB,APOE,HSPA5,APOA2,FN1,SERPINF2,CALR,ACTG1,PDIA3,THBS1,PROS1,CPE,C3,LRG1,A2M,SERPINA5,LGALS3BP,RNASET2,CLU,APOA1,AHSG,SERPINA1,SERPINF1,ITIH3,APOC3,ORM2,ALB,ORM…
GO:CC	platelet alpha granule lumen	GO:0031093	2.94793e-24	23.5305	66	217	22	18960	ALDOA,ACTN4,FGA,APP,SERPINA3,FGG,FN1,SERPINF2,THBS1,PROS1,A2M,CLU,AHSG,SERPINA1,ORM2,ALB,ORM1,A1BG,F5,ACTN1,FGB,IGF2
GO:CC	platelet alpha granule	GO:0031091	6.06268e-24	23.2173	90	217	24	18960	ALDOA,ACTN4,FGA,APP,SERPINA3,FGG,FN1,SERPINF2,THBS1,PROS1,A2M,SERPINA5,CLU,AHSG,SERPINA1,ORM2,ALB,ORM1,A1BG,F5,ACTN1,FGB,APLP2,IGF2
GO:CC	membrane-enclosed lumen	GO:0031974	8.12744e-24	23.09	5565	217	139	18960	AGRN,GLUD1,RAN,UBA1,PGAM1,CTSC,SPTAN1,RPSA,XRCC5,GPI,PSMA7,PSMB6,HSP90AB1,HSPD1,NME2,IDH1,CTSD,HSP90AA1,HSPE1,GSR,PDIA4,PSMA3,PSMA1,HSPA8,ALDOA,HSPA1B,XRCC6,ACTN4,GGH,TUBB4B,PKM,FGA,HSP90B1,PSMA5,TKT,APP,TUBB,BTD,EEF2,YWHAZ,PSAP,SET,P4HB,GPC3,SPTBN1,CDH2,GSN,F10,SERPINA3,FGG,TTR,APOB,APOE,SERPIND1,HSPA5,APOA2,FN1,PROC,F2,SERPINF2,CALR,LAMC1,PDIA3,ITIH2,THBS1,PROS1,C3,LRG1,A2M,LGALS3BP,SDC4,RNASET…
GO:CC	organelle lumen	GO:0043233	8.12744e-24	23.09	5565	217	139	18960	AGRN,GLUD1,RAN,UBA1,PGAM1,CTSC,SPTAN1,RPSA,XRCC5,GPI,PSMA7,PSMB6,HSP90AB1,HSPD1,NME2,IDH1,CTSD,HSP90AA1,HSPE1,GSR,PDIA4,PSMA3,PSMA1,HSPA8,ALDOA,HSPA1B,XRCC6,ACTN4,GGH,TUBB4B,PKM,FGA,HSP90B1,PSMA5,TKT,APP,TUBB,BTD,EEF2,YWHAZ,PSAP,SET,P4HB,GPC3,SPTBN1,CDH2,GSN,F10,SERPINA3,FGG,TTR,APOB,APOE,SERPIND1,HSPA5,APOA2,FN1,PROC,F2,SERPINF2,CALR,LAMC1,PDIA3,ITIH2,THBS1,PROS1,C3,LRG1,A2M,LGALS3BP,SDC4,RNASET…
GO:CC	endomembrane system	GO:0012505	1.19116e-23	22.924	4640	217	126	18960	AGRN,TFRC,GLUD1,FASN,RAN,UBA1,PGAM1,CTSC,SPTAN1,XRCC5,GPI,GAPDH,HSP90AB1,HSPD1,EEF1G,CLSTN1,NME2,IDH1,CTSD,HSP90AA1,PDIA4,HSPA8,CLIC1,ALDOA,HSPA1B,XRCC6,ACTN4,GGH,CLTC,TUBB4B,PKM,FGA,HSP90B1,PSMA5,TKT,APP,TUBB,TFPI,EEF2,PSAP,VTN,SET,P4HB,GPC3,CDH2,GSN,CLSTN3,F10,SERPINA3,FGG,TTR,APOB,APOE,SERPIND1,HSPA5,APOA2,FN1,PROC,F2,SERPINF2,CALR,LAMC1,PDIA3,ITIH2,THBS1,PROS1,CPE,C3,LRG1,A2M,SERPINA5,LGALS3B…
GO:CC	membrane-bounded organelle	GO:0043227	1.89155e-20	19.7232	12858	217	206	18960	AGRN,TFRC,GLUD1,ACAT2,FASN,RAN,UBA1,AHCY,PGAM1,CTSC,SPTAN1,RPSA,ALDH1A1,AKR1C1,HSPA4,XRCC5,GPI,ATRN,GAPDH,PSMA7,PSMB6,QPRT,HSP90AB1,HSPD1,EEF1G,CLSTN1,NME2,IDH1,CTSD,HSP90AA1,KRT19,PGK1,LDHA,FBLN1,HSPE1,TALDO1,RPLP2,GSR,PDIA4,ENO1,ATIC,PSMA3,PSAT1,C5,PSMA1,HSPA8,CLIC1,PRDX1,ALDOA,HSPA1B,XRCC6,ACTN4,GGH,CLTC,TUBB4B,PKM,MDH1,FGA,HSP90B1,TPM3,NID1,PSMA5,TKT,TPI1,RBP4,APP,TUBB,YWHAE,BTD,TFPI,EEF2,YWH…
GO:CC	ficolin-1-rich granule lumen	GO:1904813	2.56366e-20	19.5911	124	217	24	18960	PGAM1,GPI,HSP90AB1,NME2,IDH1,CTSD,HSP90AA1,HSPA8,ALDOA,HSPA1B,XRCC6,PKM,PSMA5,EEF2,GSN,LRG1,SERPINA1,A1BG,MIF,CCT8,KPNB1,CTSB,ACLY,APEH
GO:CC	vacuolar lumen	GO:0005775	1.09038e-16	15.9624	174	217	24	18960	AGRN,CTSC,CTSD,HSP90AA1,HSPA8,GGH,TUBB4B,TUBB,PSAP,GPC3,SERPINA3,TTR,APOB,C3,SDC4,RNASET2,ORM2,CAP1,CCT8,FUCA2,CTSB,GDI2,ACLY,VCAN
GO:CC	melanosome	GO:0042470	1.57191e-16	15.8036	105	217	20	18960	TFRC,FASN,RAN,AHCY,HSP90AB1,CTSD,HSP90AA1,PDIA4,HSPA8,PRDX1,GGH,CLTC,HSP90B1,YWHAE,YWHAZ,P4HB,HSPA5,PDIA3,SERPINF1,CTSB
GO:CC	pigment granule	GO:0048770	1.57191e-16	15.8036	105	217	20	18960	TFRC,FASN,RAN,AHCY,HSP90AB1,CTSD,HSP90AA1,PDIA4,HSPA8,PRDX1,GGH,CLTC,HSP90B1,YWHAE,YWHAZ,P4HB,HSPA5,PDIA3,SERPINF1,CTSB
GO:CC	ficolin-1-rich granule	GO:0101002	4.15121e-16	15.3818	184	217	24	18960	PGAM1,GPI,HSP90AB1,NME2,IDH1,CTSD,HSP90AA1,HSPA8,ALDOA,HSPA1B,XRCC6,PKM,PSMA5,EEF2,GSN,LRG1,SERPINA1,A1BG,MIF,CCT8,KPNB1,CTSB,ACLY,APEH
GO:CC	organelle	GO:0043226	1.52777e-14	13.8159	14008	217	207	18960	AGRN,TFRC,GLUD1,ACAT2,FASN,RAN,UBA1,AHCY,PGAM1,CTSC,SPTAN1,RPSA,ALDH1A1,AKR1C1,HSPA4,XRCC5,GPI,ATRN,GAPDH,PSMA7,PSMB6,QPRT,HSP90AB1,HSPD1,EEF1G,CLSTN1,NME2,IDH1,CTSD,HSP90AA1,KRT19,PGK1,LDHA,FBLN1,HSPE1,TALDO1,RPLP2,GSR,PDIA4,ENO1,ATIC,PSMA3,PSAT1,C5,PSMA1,HSPA8,TUBA1B,CLIC1,PRDX1,ALDOA,HSPA1B,XRCC6,ACTN4,GGH,CLTC,TUBB4B,PKM,MDH1,FGA,HSP90B1,TPM3,NID1,PSMA5,TKT,TPI1,RBP4,APP,TUBB,YWHAE,BTD,TFPI,E…
GO:CC	cytoplasm	GO:0005737	1.88956e-14	13.7236	11911	217	191	18960	AGRN,TFRC,GLUD1,ACAT2,FASN,RAN,UBA1,AHCY,PGAM1,CTSC,SPTAN1,RPSA,ALDH1A1,AKR1C1,HSPA4,XRCC5,GPI,ATRN,GAPDH,PSMA7,PSMB6,QPRT,HSP90AB1,HSPD1,EEF1G,CLSTN1,NME2,IDH1,CTSD,HSP90AA1,KRT19,PGK1,LDHA,HSPE1,TALDO1,RPLP2,GSR,PDIA4,ENO1,ATIC,PSMA3,PSAT1,PSMA1,HSPA8,TUBA1B,CLIC1,PRDX1,ALDOA,HSPA1B,XRCC6,ACTN4,GGH,CLTC,TUBB4B,PKM,MDH1,FGA,HSP90B1,TPM3,PSMA5,TKT,TPI1,RBP4,APP,TUBB,YWHAE,BTD,TFPI,EEF2,YWHAZ,PSAP…
GO:CC	cell surface	GO:0009986	6.62083e-14	13.1791	899	217	44	18960	TFRC,HSP90AB1,HSPD1,CLSTN1,HSP90AA1,GSR,PDIA4,ENO1,FGA,APP,TFPI,P4HB,GPC3,CDH2,CLSTN3,PTPRK,F10,FGG,HSPA5,F2,SERPINF2,CALR,PDIA3,THBS1,C3,SERPINA5,SDC4,CLU,APOA1,DAG1,KRT10,AMBP,VASN,APOH,TF,AZGP1,PCSK9,KRT18,MIF,FGB,CRLF1,ALCAM,ICAM1,CTSB
GO:CC	intracellular organelle lumen	GO:0070013	3.23762e-13	12.4898	5402	217	118	18960	AGRN,GLUD1,RAN,UBA1,CTSC,RPSA,XRCC5,GPI,PSMA7,PSMB6,HSP90AB1,HSPD1,IDH1,CTSD,HSP90AA1,HSPE1,GSR,PDIA4,PSMA3,PSMA1,HSPA8,HSPA1B,XRCC6,ACTN4,GGH,TUBB4B,FGA,HSP90B1,PSMA5,TKT,APP,TUBB,BTD,YWHAZ,PSAP,SET,P4HB,GPC3,SPTBN1,CDH2,F10,SERPINA3,FGG,TTR,APOB,APOE,SERPIND1,HSPA5,APOA2,FN1,PROC,F2,CALR,LAMC1,PDIA3,ITIH2,THBS1,PROS1,C3,SDC4,RNASET2,CLU,APOA1,AHSG,MATN3,DAG1,SERPINA1,AFP,ORM2,NOTUM,SERPINC1,ALB…
GO:CC	endoplasmic reticulum	GO:0005783	2.17772e-12	11.662	1982	217	64	18960	GLUD1,UBA1,CTSC,HSPD1,EEF1G,CLSTN1,PDIA4,HSPA1B,PKM,FGA,HSP90B1,TKT,APP,TFPI,VTN,SET,P4HB,GPC3,CDH2,CLSTN3,F10,FGG,APOB,APOE,SERPIND1,HSPA5,APOA2,FN1,PROC,F2,CALR,LAMC1,PDIA3,ITIH2,THBS1,PROS1,C3,RNASET2,CLU,APOA1,AHSG,MATN3,DAG1,SERPINA1,AFP,NOTUM,SERPINC1,ALB,TF,PCSK9,F5,BPIFB2,CP,RPLP0,IGFBP1,LAMB1,FGB,KPNB1,APLP2,PRKCSH,SPP1,FUCA2,NUCB1,VCAN
GO:CC	focal adhesion	GO:0005925	3.07381e-12	11.5123	420	217	29	18960	RPLP2,HSPA8,HSPA1B,ACTN4,CLTC,HSP90B1,YWHAE,YWHAZ,P4HB,CDH2,GSN,FLNB,HSPA5,CALR,ACTG1,PDIA3,SDC4,DAG1,CFL1,CAP1,ACTN1,RPLP0,HSPA9,RPL12,ALCAM,NPM1,ICAM1,HNRNPK,GDI2
GO:CC	high-density lipoprotein particle	GO:0034364	3.7728e-12	11.4233	29	217	11	18960	APOB,APOE,APOM,APOC4-APOC2,APOA2,CLU,APOA1,APOC3,SAA4,APOH,PLTP
GO:CC	cell-substrate junction	GO:0030055	4.71284e-12	11.3267	427	217	29	18960	RPLP2,HSPA8,HSPA1B,ACTN4,CLTC,HSP90B1,YWHAE,YWHAZ,P4HB,CDH2,GSN,FLNB,HSPA5,CALR,ACTG1,PDIA3,SDC4,DAG1,CFL1,CAP1,ACTN1,RPLP0,HSPA9,RPL12,ALCAM,NPM1,ICAM1,HNRNPK,GDI2
GO:CC	fibrinogen complex	GO:0005577	7.0621e-11	10.1511	8	217	7	18960	FGA,FGG,FN1,SERPINF2,THBS1,FGL1,FGB
GO:CC	lipoprotein particle	GO:1990777	1.19916e-10	9.92112	38	217	11	18960	APOB,APOE,APOM,APOC4-APOC2,APOA2,CLU,APOA1,APOC3,SAA4,APOH,PLTP
GO:CC	plasma lipoprotein particle	GO:0034358	1.19916e-10	9.92112	38	217	11	18960	APOB,APOE,APOM,APOC4-APOC2,APOA2,CLU,APOA1,APOC3,SAA4,APOH,PLTP
GO:CC	protein-lipid complex	GO:0032994	3.0554e-10	9.51493	41	217	11	18960	APOB,APOE,APOM,APOC4-APOC2,APOA2,CLU,APOA1,APOC3,SAA4,APOH,PLTP
GO:CC	azurophil granule lumen	GO:0035578	8.14658e-10	9.08902	91	217	14	18960	CTSC,GGH,TUBB4B,TUBB,SERPINA3,TTR,C3,RNASET2,ORM2,CAP1,CCT8,FUCA2,GDI2,ACLY
GO:CC	anchoring junction	GO:0070161	1.0279e-08	7.98805	836	217	35	18960	UBA1,RPLP2,HSPA8,HSPA1B,ACTN4,CLTC,HSP90B1,APP,YWHAE,YWHAZ,P4HB,CDH2,GSN,FLNB,PTPRK,HSPA5,CALR,ACTG1,PDIA3,SDC4,DAG1,CFL1,KRT8,KRT18,CAP1,ACTN1,RPLP0,CADM1,HSPA9,RPL12,ALCAM,NPM1,ICAM1,HNRNPK,GDI2
GO:CC	lysosome	GO:0005764	1.33097e-08	7.87583	712	217	32	18960	AGRN,UBA1,CTSC,HSP90AB1,CTSD,HSP90AA1,HSPA8,GGH,CLTC,TUBB4B,TUBB,PSAP,GPC3,SERPINA3,TTR,APOB,C3,SDC4,RNASET2,ORM2,VASN,PCSK9,CP,GOT1,CAP1,SOD1,CCT8,FUCA2,CTSB,GDI2,ACLY,VCAN
GO:CC	lytic vacuole	GO:0000323	1.33097e-08	7.87583	712	217	32	18960	AGRN,UBA1,CTSC,HSP90AB1,CTSD,HSP90AA1,HSPA8,GGH,CLTC,TUBB4B,TUBB,PSAP,GPC3,SERPINA3,TTR,APOB,C3,SDC4,RNASET2,ORM2,VASN,PCSK9,CP,GOT1,CAP1,SOD1,CCT8,FUCA2,CTSB,GDI2,ACLY,VCAN
GO:CC	triglyceride-rich plasma lipoprotein particle	GO:0034385	1.76835e-08	7.75243	21	217	8	18960	APOB,APOE,APOM,APOC4-APOC2,APOA2,APOA1,APOC3,APOH
GO:CC	very-low-density lipoprotein particle	GO:0034361	1.76835e-08	7.75243	21	217	8	18960	APOB,APOE,APOM,APOC4-APOC2,APOA2,APOA1,APOC3,APOH
GO:CC	chylomicron	GO:0042627	2.85769e-08	7.54399	14	217	7	18960	APOB,APOE,APOC4-APOC2,APOA2,APOA1,APOC3,APOH
GO:CC	proteasome core complex	GO:0005839	4.17785e-08	7.37905	23	217	8	18960	PSMA7,PSMB6,PSMA3,PSMA1,PSMA5,PSMB5,PSMA6,PSMB4
GO:CC	azurophil granule	GO:0042582	1.07669e-07	6.96791	154	217	15	18960	CTSC,GGH,TUBB4B,TUBB,PSAP,SERPINA3,TTR,C3,RNASET2,ORM2,CAP1,CCT8,FUCA2,GDI2,ACLY
GO:CC	primary lysosome	GO:0005766	1.07669e-07	6.96791	154	217	15	18960	CTSC,GGH,TUBB4B,TUBB,PSAP,SERPINA3,TTR,C3,RNASET2,ORM2,CAP1,CCT8,FUCA2,GDI2,ACLY
GO:CC	cytosol	GO:0005829	1.08501e-07	6.96457	5303	217	104	18960	ACAT2,FASN,RAN,UBA1,AHCY,PGAM1,SPTAN1,RPSA,ALDH1A1,AKR1C1,HSPA4,XRCC5,GPI,GAPDH,PSMA7,PSMB6,QPRT,HSP90AB1,HSPD1,EEF1G,NME2,IDH1,HSP90AA1,KRT19,PGK1,LDHA,TALDO1,RPLP2,GSR,ENO1,ATIC,PSMA3,PSAT1,PSMA1,HSPA8,PRDX1,ALDOA,HSPA1B,XRCC6,ACTN4,GGH,CLTC,TUBB4B,PKM,MDH1,HSP90B1,TPM3,PSMA5,TKT,TPI1,RBP4,APP,YWHAE,EEF2,YWHAZ,SET,P4HB,SPTBN1,GSN,FLNB,PAICS,APOB,HSPA5,APOA2,CALR,ACTG1,A2M,CLU,APOA1,DAG1,KRT10,A…
GO:CC	vacuole	GO:0005773	3.43959e-07	6.46349	810	217	32	18960	AGRN,UBA1,CTSC,HSP90AB1,CTSD,HSP90AA1,HSPA8,GGH,CLTC,TUBB4B,TUBB,PSAP,GPC3,SERPINA3,TTR,APOB,C3,SDC4,RNASET2,ORM2,VASN,PCSK9,CP,GOT1,CAP1,SOD1,CCT8,FUCA2,CTSB,GDI2,ACLY,VCAN
GO:CC	endocytic vesicle lumen	GO:0071682	6.08866e-07	6.21548	20	217	7	18960	HSP90AA1,HSP90B1,APOB,APOE,CALR,APOA1,HP
GO:CC	cell periphery	GO:0071944	1.54986e-06	5.80971	6169	217	112	18960	AGRN,TFRC,FASN,CTSC,SPTAN1,RPSA,XRCC5,GPI,ATRN,GAPDH,HSP90AB1,HSPD1,CLSTN1,NME2,CTSD,HSP90AA1,KRT19,FBLN1,GSR,ENO1,ATIC,C5,HSPA8,CLIC1,HSPA1B,CLTC,PKM,FGA,HSP90B1,NID1,APP,YWHAE,TFPI,EEF2,PSAP,VTN,P4HB,GPC3,SPTBN1,CDH2,GSN,CLSTN3,FLNB,PTPRK,F10,SERPINA3,FGG,APOB,APOE,C4BPA,HSPA5,C4B,FN1,F2,SERPINF2,CALR,LAMC1,ACTG1,ITIH2,THBS1,PROS1,CPE,C3,A2M,SERPINA5,LGALS3BP,SDC4,RELN,CLU,APOA1,AHSG,MATN3,DAG1…
GO:CC	spherical high-density lipoprotein particle	GO:0034366	3.89827e-06	5.40913	8	217	5	18960	APOM,APOA2,CLU,APOA1,APOC3
GO:CC	lysosomal lumen	GO:0043202	5.49434e-06	5.26008	97	217	11	18960	AGRN,CTSD,HSP90AA1,HSPA8,PSAP,GPC3,APOB,SDC4,RNASET2,CTSB,VCAN
GO:CC	proteasome core complex, alpha-subunit complex	GO:0019773	1.7217e-05	4.76404	10	217	5	18960	PSMA7,PSMA3,PSMA1,PSMA5,PSMA6
GO:CC	external side of plasma membrane	GO:0009897	2.00572e-05	4.69773	408	217	20	18960	TFRC,GSR,FGA,P4HB,F10,FGG,F2,CALR,THBS1,SERPINA5,DAG1,TF,AZGP1,PCSK9,KRT18,FGB,CRLF1,ALCAM,ICAM1,CTSB
GO:CC	proteasome complex	GO:0000502	2.29148e-05	4.63988	66	217	9	18960	PSMA7,PSMB6,PSMA3,PSMA1,PSMA5,PSME1,PSMB5,PSMA6,PSMB4
GO:CC	intermediate-density lipoprotein particle	GO:0034363	3.15716e-05	4.5007	5	217	4	18960	APOB,APOE,APOA1,APOC3
GO:CC	endopeptidase complex	GO:1905369	4.96555e-05	4.30403	72	217	9	18960	PSMA7,PSMB6,PSMA3,PSMA1,PSMA5,PSME1,PSMB5,PSMA6,PSMB4
GO:CC	tertiary granule lumen	GO:1904724	7.57538e-05	4.1206	55	217	8	18960	SPTAN1,IDH1,CTSD,ALDOA,GGH,LRG1,ORM1,HP
GO:CC	Golgi lumen	GO:0005796	7.6737e-05	4.115	99	217	10	18960	AGRN,APP,GPC3,F10,PROC,F2,PROS1,SDC4,DAG1,VCAN
GO:CC	protein-containing complex	GO:0032991	8.21179e-05	4.08556	5548	217	99	18960	TFRC,RAN,SPTAN1,RPSA,XRCC5,GAPDH,PSMA7,PSMB6,QPRT,HSP90AB1,HSPD1,HSP90AA1,KRT19,RPLP2,ENO1,PSMA3,C5,PSMA1,HSPA8,CLIC1,HSPA1B,XRCC6,ACTN4,CLTC,PKM,FGA,HSP90B1,TPM3,PSMA5,RBP4,APP,TUBB,YWHAE,EEF2,VTN,SET,P4HB,SPTBN1,CDH2,GSN,CLSTN3,FGG,TTR,APOB,APOE,APOM,APOC4-APOC2,HSPA5,APOA2,FN1,SERPINF2,CALR,LAMC1,ACTG1,PDIA3,THBS1,C3,SERPINA5,CLU,APOA1,DAG1,APOC3,SAA4,ALB,APOH,TF,PCSK9,HP,PLTP,PRDX3,KRT8,PSME1…
GO:CC	low-density lipoprotein particle	GO:0034362	0.000131758	3.88022	14	217	5	18960	APOB,APOE,APOM,APOC4-APOC2,APOA1
GO:CC	specific granule lumen	GO:0035580	0.000172746	3.76259	61	217	8	18960	SPTAN1,CTSD,GGH,LRG1,ORM2,ORM1,HP,KPNB1
GO:CC	cell junction	GO:0030054	0.000338823	3.47003	2105	217	49	18960	AGRN,UBA1,PSMA7,CLSTN1,RPLP2,PSMA3,HSPA8,HSPA1B,ACTN4,CLTC,FGA,HSP90B1,APP,YWHAE,EEF2,YWHAZ,P4HB,SPTBN1,CDH2,GSN,CLSTN3,FLNB,PTPRK,APOE,HSPA5,C4B,CALR,ACTG1,PDIA3,SDC4,CLU,DAG1,GOT1,CFL1,KRT8,KRT18,CAP1,ACTN1,RPLP0,CADM1,HSPA9,RPL12,DPYSL2,FGB,ALCAM,NPM1,ICAM1,HNRNPK,GDI2
GO:CC	intracellular anatomical structure	GO:0005622	0.00050172	3.29954	14790	217	196	18960	AGRN,TFRC,GLUD1,ACAT2,FASN,RAN,UBA1,AHCY,PGAM1,CTSC,SPTAN1,RPSA,ALDH1A1,AKR1C1,HSPA4,XRCC5,GPI,ATRN,GAPDH,PSMA7,PSMB6,QPRT,HSP90AB1,HSPD1,EEF1G,CLSTN1,NME2,IDH1,CTSD,HSP90AA1,KRT19,PGK1,LDHA,HSPE1,TALDO1,RPLP2,GSR,PDIA4,ENO1,ATIC,PSMA3,PSAT1,PSMA1,HSPA8,TUBA1B,CLIC1,PRDX1,ALDOA,HSPA1B,XRCC6,ACTN4,GGH,CLTC,TUBB4B,PKM,MDH1,FGA,HSP90B1,TPM3,PSMA5,TKT,TPI1,RBP4,APP,TUBB,YWHAE,BTD,TFPI,EEF2,YWHAZ,PSAP…
GO:CC	discoidal high-density lipoprotein particle	GO:0034365	0.000564423	3.2484	3	217	3	18960	APOE,APOM,APOA1
GO:CC	peptidase complex	GO:1905368	0.000596687	3.22425	96	217	9	18960	PSMA7,PSMB6,PSMA3,PSMA1,PSMA5,PSME1,PSMB5,PSMA6,PSMB4
GO:CC	basement membrane	GO:0005604	0.00065125	3.18625	97	217	9	18960	AGRN,ATRN,FBLN1,NID1,FN1,LAMC1,DAG1,SERPINF1,LAMB1
GO:CC	side of membrane	GO:0098552	0.00103028	2.98705	619	217	22	18960	TFRC,GSR,HSPA8,FGA,P4HB,F10,FGG,F2,CALR,THBS1,SERPINA5,DAG1,TF,AZGP1,PCSK9,KRT18,FGB,CRLF1,ALCAM,ICAM1,CTSB,NUCB1
GO:CC	intracellular membrane-bounded organelle	GO:0043231	0.00157223	2.80348	11296	217	161	18960	AGRN,TFRC,GLUD1,ACAT2,FASN,RAN,UBA1,AHCY,CTSC,SPTAN1,RPSA,HSPA4,XRCC5,GPI,GAPDH,PSMA7,PSMB6,HSP90AB1,HSPD1,EEF1G,CLSTN1,NME2,IDH1,CTSD,HSP90AA1,LDHA,HSPE1,TALDO1,GSR,PDIA4,ENO1,PSMA3,PSMA1,HSPA8,CLIC1,PRDX1,ALDOA,HSPA1B,XRCC6,ACTN4,GGH,CLTC,TUBB4B,PKM,FGA,HSP90B1,PSMA5,TKT,TPI1,APP,TUBB,YWHAE,BTD,TFPI,EEF2,YWHAZ,PSAP,VTN,SET,P4HB,GPC3,SPTBN1,CDH2,GSN,CLSTN3,FLNB,PTPRK,F10,SERPINA3,FGG,TTR,APOB,AP…
GO:CC	perinuclear region of cytoplasm	GO:0048471	0.00488903	2.31078	735	217	23	18960	TFRC,GAPDH,HSP90AB1,NME2,HSP90AA1,HSPA8,CLIC1,HSPA1B,ACTN4,HSP90B1,APP,SET,GSN,CALR,CLU,SERPINF1,TF,PCSK9,KRT18,LAMB1,SPP1,CTSB,LMNA
GO:CC	myofibril	GO:0030016	0.00570478	2.24376	231	217	12	18960	KRT19,ENO1,ALDOA,TPM3,SPTBN1,FLNB,ACTG1,SDC4,DAG1,KRT8,PSMA6,ACTN1
GO:CC	platelet dense granule lumen	GO:0031089	0.00582809	2.23447	14	217	4	18960	LGALS3BP,ITIH3,APOH,SERPINA4
GO:CC	contractile fiber	GO:0043292	0.00834071	2.0788	240	217	12	18960	KRT19,ENO1,ALDOA,TPM3,SPTBN1,FLNB,ACTG1,SDC4,DAG1,KRT8,PSMA6,ACTN1
GO:CC	intracellular organelle	GO:0043229	0.0145365	1.83754	12491	217	170	18960	AGRN,TFRC,GLUD1,ACAT2,FASN,RAN,UBA1,AHCY,CTSC,SPTAN1,RPSA,HSPA4,XRCC5,GPI,GAPDH,PSMA7,PSMB6,HSP90AB1,HSPD1,EEF1G,CLSTN1,NME2,IDH1,CTSD,HSP90AA1,KRT19,LDHA,HSPE1,TALDO1,RPLP2,GSR,PDIA4,ENO1,PSMA3,PSMA1,HSPA8,TUBA1B,CLIC1,PRDX1,ALDOA,HSPA1B,XRCC6,ACTN4,GGH,CLTC,TUBB4B,PKM,MDH1,FGA,HSP90B1,TPM3,PSMA5,TKT,TPI1,APP,TUBB,YWHAE,BTD,TFPI,EEF2,YWHAZ,PSAP,VTN,SET,P4HB,GPC3,SPTBN1,CDH2,GSN,CLSTN3,FLNB,PTPRK…
GO:CC	costamere	GO:0043034	0.0215748	1.66605	19	217	4	18960	KRT19,SDC4,DAG1,KRT8
GO:CC	supramolecular fiber	GO:0099512	0.0276126	1.55889	993	217	26	18960	NME2,KRT19,FBLN1,ENO1,TUBA1B,ALDOA,CLTC,TUBB4B,TPM3,TUBB,SPTBN1,FLNB,ACTG1,SDC4,DAG1,KRT10,KRT9,KRT8,PSMA6,KRT18,ACTN1,DPYSL2,CCT8,CCT3,LMNB1,LMNA
GO:CC	supramolecular polymer	GO:0099081	0.031473	1.50206	1001	217	26	18960	NME2,KRT19,FBLN1,ENO1,TUBA1B,ALDOA,CLTC,TUBB4B,TPM3,TUBB,SPTBN1,FLNB,ACTG1,SDC4,DAG1,KRT10,KRT9,KRT8,PSMA6,KRT18,ACTN1,DPYSL2,CCT8,CCT3,LMNB1,LMNA
GO:CC	platelet dense granule	GO:0042827	0.032721	1.48517	21	217	4	18960	LGALS3BP,ITIH3,APOH,SERPINA4
GO:CC	supramolecular complex	GO:0099080	0.0424733	1.37188	1323	217	31	18960	NME2,KRT19,FBLN1,ENO1,TUBA1B,ALDOA,CLTC,TUBB4B,TPM3,TUBB,SPTBN1,FLNB,ACTG1,SDC4,DAG1,KRT10,KRT9,KRT8,PSMA6,KRT18,ACTN1,RPLP0,DPYSL2,YBX1,CCT8,KPNB1,CCT3,NCL,HNRNPK,LMNB1,LMNA
KEGG	Complement and coagulation cascades	KEGG:04610	2.72665e-18	17.5644	85	162	23	8001	C5,FGA,TFPI,VTN,F10,FGG,C4BPA,CFI,SERPIND1,C4B,PROC,F2,SERPINF2,PROS1,C3,A2M,SERPINA5,CLU,C2,SERPINA1,SERPINC1,F5,FGB
KEGG	Carbon metabolism	KEGG:01200	1.29914e-09	8.88634	116	162	18	8001	GLUD1,ACAT2,PGAM1,GPI,GAPDH,IDH1,PGK1,TALDO1,ENO1,PSAT1,ALDOA,PKM,MDH1,TKT,TPI1,GOT1,MDH2,FH
KEGG	Biosynthesis of amino acids	KEGG:01230	2.75404e-06	5.56003	75	162	12	8001	PGAM1,GAPDH,IDH1,PGK1,TALDO1,ENO1,PSAT1,ALDOA,PKM,TKT,TPI1,GOT1
KEGG	Proteasome	KEGG:03050	2.67185e-05	4.57319	46	162	9	8001	PSMA7,PSMB6,PSMA3,PSMA1,PSMA5,PSME1,PSMB5,PSMA6,PSMB4
KEGG	Antigen processing and presentation	KEGG:04612	0.000107347	3.96921	69	162	10	8001	HSPA4,HSP90AB1,HSP90AA1,HSPA8,HSPA1B,HSPA5,CALR,PDIA3,PSME1,CTSB
KEGG	Staphylococcus aureus infection	KEGG:05150	0.000124664	3.90426	87	162	11	8001	KRT19,C5,FGG,CFI,C4B,C3,C2,KRT10,KRT9,KRT18,ICAM1
KEGG	Cholesterol metabolism	KEGG:04979	0.000622853	3.20561	50	162	8	8001	APOB,APOE,APOA2,APOA1,APOC3,APOH,PCSK9,PLTP
KEGG	Glycolysis / Gluconeogenesis	KEGG:00010	0.00072082	3.14217	67	162	9	8001	PGAM1,GPI,GAPDH,PGK1,LDHA,ENO1,ALDOA,PKM,TPI1
KEGG	ECM-receptor interaction	KEGG:04512	0.00102408	2.98967	88	162	10	8001	AGRN,VTN,FN1,LAMC1,THBS1,SDC4,RELN,DAG1,LAMB1,SPP1
KEGG	Prion disease	KEGG:05020	0.00352016	2.45344	273	162	17	8001	PSMA7,PSMB6,PSMA3,C5,PSMA1,HSPA8,TUBA1B,HSPA1B,TUBB4B,PSMA5,TUBB,HSPA5,LAMC1,PSMB5,PSMA6,SOD1,PSMB4
KEGG	Citrate cycle (TCA cycle)	KEGG:00020	0.0304433	1.51651	30	162	5	8001	IDH1,MDH1,MDH2,ACLY,FH
KEGG	Pyruvate metabolism	KEGG:00620	0.0341314	1.46685	47	162	6	8001	ACAT2,LDHA,PKM,MDH1,MDH2,FH
KEGG	Cysteine and methionine metabolism	KEGG:00270	0.0429923	1.36661	49	162	6	8001	AHCY,LDHA,PSAT1,MDH1,GOT1,MDH2
KEGG	Estrogen signaling pathway	KEGG:04915	0.0444782	1.35185	137	162	10	8001	HSP90AB1,CTSD,HSP90AA1,KRT19,HSPA8,HSPA1B,HSP90B1,KRT10,KRT9,KRT18
REAC	Regulation of Insulin-like Growth Factor (IGF) transport and uptake by Insulin-like Growth Factor Binding Proteins (IGFBPs)	REAC:R-HSA-381426	1.81466e-35	34.7412	124	196	39	10543	FGA,HSP90B1,APP,P4HB,GPC3,CDH2,FGG,APOB,APOE,SERPIND1,APOA2,FN1,PROC,F2,LAMC1,ITIH2,C3,APOA1,AHSG,MATN3,SERPINA1,AFP,NOTUM,SERPINC1,ALB,TF,PCSK9,F5,BPIFB2,CP,IGFBP1,LAMB1,APLP2,PRKCSH,IGF2,SPP1,FUCA2,NUCB1,VCAN
REAC	Post-translational protein phosphorylation	REAC:R-HSA-8957275	2.79166e-35	34.5541	107	196	37	10543	FGA,HSP90B1,APP,P4HB,GPC3,CDH2,FGG,APOB,APOE,SERPIND1,APOA2,FN1,PROC,LAMC1,ITIH2,C3,APOA1,AHSG,MATN3,SERPINA1,AFP,NOTUM,SERPINC1,ALB,TF,PCSK9,F5,BPIFB2,CP,IGFBP1,LAMB1,APLP2,PRKCSH,SPP1,FUCA2,NUCB1,VCAN
REAC	Platelet degranulation	REAC:R-HSA-114608	3.51731e-28	27.4538	125	196	34	10543	ALDOA,ACTN4,FGA,APP,PSAP,SERPINA3,FGG,HSPA5,FN1,SERPINF2,THBS1,PROS1,A2M,LGALS3BP,CLU,APOA1,AHSG,SERPINA1,ITIH3,ORM2,ALB,ORM1,APOH,TF,A1BG,F5,CFL1,CAP1,ACTN1,SOD1,FGB,APLP2,IGF2,SERPINA4
REAC	Response to elevated platelet cytosolic Ca2+	REAC:R-HSA-76005	1.5266e-27	26.8163	130	196	34	10543	ALDOA,ACTN4,FGA,APP,PSAP,SERPINA3,FGG,HSPA5,FN1,SERPINF2,THBS1,PROS1,A2M,LGALS3BP,CLU,APOA1,AHSG,SERPINA1,ITIH3,ORM2,ALB,ORM1,APOH,TF,A1BG,F5,CFL1,CAP1,ACTN1,SOD1,FGB,APLP2,IGF2,SERPINA4
REAC	Innate Immune System	REAC:R-HSA-168249	2.11285e-20	19.6751	1073	196	71	10543	PGAM1,CTSC,SPTAN1,XRCC5,GPI,PSMA7,PSMB6,HSP90AB1,NME2,IDH1,CTSD,HSP90AA1,PSMA3,C5,PSMA1,HSPA8,ALDOA,HSPA1B,XRCC6,GGH,TUBB4B,PKM,FGA,HSP90B1,PSMA5,APP,TUBB,EEF2,PSAP,VTN,CPN1,GSN,SERPINA3,FGG,TTR,APOB,C4BPA,CFI,C4B,F2,ACTG1,PROS1,C3,LRG1,RNASET2,CLU,C2,AHSG,SERPINA1,CPN2,ORM2,ORM1,A1BG,HP,BPIFB2,CFL1,PSME1,PSMB5,PSMA6,CAP1,MIF,FGB,CCT8,KPNB1,PRKCSH,FUCA2,CTSB,PSMB4,GDI2,ACLY,APEH
REAC	Platelet activation, signaling and aggregation	REAC:R-HSA-76002	3.36515e-19	18.473	258	196	36	10543	ALDOA,ACTN4,FGA,APP,YWHAZ,PSAP,SERPINA3,FGG,HSPA5,FN1,F2,SERPINF2,THBS1,PROS1,A2M,LGALS3BP,CLU,APOA1,AHSG,SERPINA1,ITIH3,ORM2,ALB,ORM1,APOH,TF,A1BG,F5,CFL1,CAP1,ACTN1,SOD1,FGB,APLP2,IGF2,SERPINA4
REAC	Neutrophil degranulation	REAC:R-HSA-6798695	3.66521e-15	14.4359	474	196	42	10543	PGAM1,CTSC,SPTAN1,XRCC5,GPI,HSP90AB1,NME2,IDH1,CTSD,HSP90AA1,HSPA8,ALDOA,HSPA1B,XRCC6,GGH,TUBB4B,PKM,PSMA5,TUBB,EEF2,PSAP,GSN,SERPINA3,TTR,C3,LRG1,RNASET2,AHSG,SERPINA1,ORM2,ORM1,A1BG,HP,CAP1,MIF,CCT8,KPNB1,FUCA2,CTSB,GDI2,ACLY,APEH
REAC	Immune System	REAC:R-HSA-168256	1.33406e-13	12.8748	2139	196	90	10543	UBA1,PGAM1,CTSC,SPTAN1,XRCC5,GPI,PSMA7,PSMB6,HSP90AB1,NME2,IDH1,CTSD,HSP90AA1,TALDO1,PSMA3,C5,PSMA1,HSPA8,TUBA1B,ALDOA,HSPA1B,XRCC6,GGH,CLTC,TUBB4B,PKM,FGA,HSP90B1,PSMA5,APP,TUBB,EEF2,YWHAZ,PSAP,VTN,CPN1,P4HB,SPTBN1,GSN,FLNB,SERPINA3,FGG,TTR,APOB,C4BPA,CFI,HSPA5,C4B,FN1,F2,CALR,ACTG1,PDIA3,PROS1,C3,LRG1,RNASET2,CLU,C2,AHSG,SERPINA1,CPN2,ORM2,ORM1,A1BG,HP,BPIFB2,PEBP1,CFL1,PSME1,PSMB5,PSMA6,CAP1,R…
REAC	Hemostasis	REAC:R-HSA-109582	1.49316e-13	12.8259	657	196	47	10543	TUBA1B,ALDOA,ACTN4,TUBB4B,FGA,APP,TFPI,YWHAZ,PSAP,F10,SERPINA3,FGG,APOB,SERPIND1,HSPA5,FN1,PROC,F2,SERPINF2,THBS1,PROS1,A2M,SERPINA5,LGALS3BP,SDC4,CLU,APOA1,AHSG,SERPINA1,ITIH3,ORM2,SERPINC1,ALB,ORM1,APOH,TF,A1BG,F5,CFL1,CAP1,ACTN1,SOD1,MIF,FGB,APLP2,IGF2,SERPINA4
REAC	Common Pathway of Fibrin Clot Formation	REAC:R-HSA-140875	1.67456e-11	10.7761	22	196	11	10543	FGA,F10,FGG,SERPIND1,PROC,F2,PROS1,SERPINA5,SERPINC1,F5,FGB
REAC	Metabolism of proteins	REAC:R-HSA-392499	3.41214e-11	10.467	1961	196	81	10543	UBA1,CTSC,SPTAN1,RPSA,PSMA7,PSMB6,EEF1G,CTSD,RPLP2,PSMA3,PSMA1,HSPA8,TUBA1B,TUBB4B,FGA,HSP90B1,PSMA5,APP,EEF2,P4HB,GPC3,SPTBN1,CDH2,GSN,F10,FGG,TTR,APOB,APOE,SERPIND1,HSPA5,APOA2,FN1,PROC,F2,CALR,LAMC1,PDIA3,ITIH2,THBS1,PROS1,CPE,C3,APOA1,AHSG,MATN3,DAG1,SERPINA1,AFP,NOTUM,SERPINC1,ALB,TF,PCSK9,AGT,F5,BPIFB2,CP,PSME1,PSMB5,PSMA6,RPLP0,IGFBP1,RPL12,LAMB1,CCT8,CCT3,APLP2,PRKCSH,IGF2,HNRNPC,SPP1,NPM…
REAC	Formation of Fibrin Clot (Clotting Cascade)	REAC:R-HSA-140877	4.63409e-11	10.334	39	196	13	10543	FGA,TFPI,F10,FGG,SERPIND1,PROC,F2,PROS1,A2M,SERPINA5,SERPINC1,F5,FGB
REAC	Post-translational protein modification	REAC:R-HSA-597592	8.23636e-11	10.0843	1377	196	65	10543	UBA1,CTSC,SPTAN1,PSMA7,PSMB6,PSMA3,PSMA1,HSPA8,TUBA1B,TUBB4B,FGA,HSP90B1,PSMA5,APP,EEF2,P4HB,GPC3,SPTBN1,CDH2,F10,FGG,APOB,APOE,SERPIND1,APOA2,FN1,PROC,F2,CALR,LAMC1,PDIA3,ITIH2,THBS1,PROS1,C3,APOA1,AHSG,MATN3,DAG1,SERPINA1,AFP,NOTUM,SERPINC1,ALB,TF,PCSK9,F5,BPIFB2,CP,PSME1,PSMB5,PSMA6,IGFBP1,LAMB1,APLP2,PRKCSH,HNRNPC,SPP1,NPM1,FUCA2,HNRNPK,NUCB1,LARGE1,PSMB4,VCAN
REAC	Retinoid metabolism and transport	REAC:R-HSA-975634	6.24896e-09	8.20419	44	196	12	10543	AGRN,AKR1C1,RBP4,GPC3,TTR,APOB,APOE,APOM,APOA2,SDC4,APOA1,APOC3
REAC	Metabolism of fat-soluble vitamins	REAC:R-HSA-6806667	1.93429e-08	7.71348	48	196	12	10543	AGRN,AKR1C1,RBP4,GPC3,TTR,APOB,APOE,APOM,APOA2,SDC4,APOA1,APOC3
REAC	Gluconeogenesis	REAC:R-HSA-70263	7.26309e-08	7.13888	32	196	10	10543	PGAM1,GPI,GAPDH,PGK1,ENO1,ALDOA,MDH1,TPI1,GOT1,MDH2
REAC	Extracellular matrix organization	REAC:R-HSA-1474244	5.31636e-07	6.27439	298	196	24	10543	AGRN,CTSD,FBLN1,FGA,NID1,APP,VTN,P4HB,FGG,TTR,FN1,LAMC1,THBS1,A2M,SDC4,MATN3,DAG1,ACTN1,LAMB1,FGB,SPP1,ICAM1,CTSB,VCAN
REAC	The role of GTSE1 in G2/M progression after G2 checkpoint	REAC:R-HSA-8852276	7.85488e-07	6.10486	79	196	13	10543	PSMA7,PSMB6,HSP90AB1,HSP90AA1,PSMA3,PSMA1,TUBA1B,TUBB4B,PSMA5,PSME1,PSMB5,PSMA6,PSMB4
REAC	Disease	REAC:R-HSA-1643685	1.20226e-06	5.92	1509	196	60	10543	AGRN,RAN,AHCY,RPSA,XRCC5,PSMA7,PSMB6,HSP90AB1,IDH1,HSP90AA1,PGK1,TALDO1,RPLP2,ENO1,PSMA3,PSMA1,TUBA1B,PRDX1,XRCC6,CLTC,TUBB4B,FGA,PSMA5,RBP4,APP,TUBB,YWHAE,BTD,EEF2,GPC3,F10,FGG,TTR,FN1,F2,CALR,ACTG1,THBS1,C3,SDC4,APOA1,DAG1,CP,PEBP1,PSME1,PSMB5,PSMA6,RPLP0,RPL12,FGB,KPNB1,PRKCSH,NPM1,HNRNPK,LMNB1,LARGE1,LMNA,PSMB4,VCAN,DKK1
REAC	Intrinsic Pathway of Fibrin Clot Formation	REAC:R-HSA-140837	1.95726e-06	5.70835	23	196	8	10543	F10,SERPIND1,PROC,F2,PROS1,A2M,SERPINA5,SERPINC1
REAC	Chylomicron assembly	REAC:R-HSA-8963888	3.09455e-06	5.5094	10	196	6	10543	P4HB,APOB,APOE,APOA2,APOA1,APOC3
REAC	Plasma lipoprotein assembly	REAC:R-HSA-8963898	7.56319e-06	5.1213	18	196	7	10543	P4HB,APOB,APOE,APOA2,A2M,APOA1,APOC3
REAC	Axon guidance	REAC:R-HSA-422475	1.0315e-05	4.98653	549	196	31	10543	AGRN,SPTAN1,RPSA,PSMA7,PSMB6,HSP90AB1,HSP90AA1,RPLP2,PSMA3,PSMA1,HSPA8,TUBA1B,CLTC,TUBB4B,PSMA5,SPTBN1,LAMC1,ACTG1,RELN,DAG1,CFL1,PSME1,PSMB5,PSMA6,CAP1,RPLP0,RPL12,LAMB1,DPYSL2,ALCAM,PSMB4
REAC	Hedgehog ligand biogenesis	REAC:R-HSA-5358346	1.05798e-05	4.97552	65	196	11	10543	PSMA7,PSMB6,PSMA3,PSMA1,PSMA5,P4HB,NOTUM,PSME1,PSMB5,PSMA6,PSMB4
REAC	Negative regulation of NOTCH4 signaling	REAC:R-HSA-9604323	1.56371e-05	4.80584	53	196	10	10543	PSMA7,PSMB6,PSMA3,PSMA1,PSMA5,YWHAZ,PSME1,PSMB5,PSMA6,PSMB4
REAC	AUF1 (hnRNP D0) binds and destabilizes mRNA	REAC:R-HSA-450408	1.88837e-05	4.72391	54	196	10	10543	PSMA7,PSMB6,PSMA3,PSMA1,HSPA8,PSMA5,PSME1,PSMB5,PSMA6,PSMB4
REAC	Regulation of mRNA stability by proteins that bind AU-rich elements	REAC:R-HSA-450531	2.28982e-05	4.6402	86	196	12	10543	PSMA7,PSMB6,PSMA3,PSMA1,HSPA8,PSMA5,YWHAZ,SET,PSME1,PSMB5,PSMA6,PSMB4
REAC	Metabolism of vitamins and cofactors	REAC:R-HSA-196854	2.49747e-05	4.6025	186	196	17	10543	AGRN,FASN,AKR1C1,QPRT,IDH1,HSP90AA1,RBP4,BTD,GPC3,TTR,APOB,APOE,APOM,APOA2,SDC4,APOA1,APOC3
REAC	Nervous system development	REAC:R-HSA-9675108	2.86206e-05	4.54332	574	196	31	10543	AGRN,SPTAN1,RPSA,PSMA7,PSMB6,HSP90AB1,HSP90AA1,RPLP2,PSMA3,PSMA1,HSPA8,TUBA1B,CLTC,TUBB4B,PSMA5,SPTBN1,LAMC1,ACTG1,RELN,DAG1,CFL1,PSME1,PSMB5,PSMA6,CAP1,RPLP0,RPL12,LAMB1,DPYSL2,ALCAM,PSMB4
REAC	Non-integrin membrane-ECM interactions	REAC:R-HSA-3000171	3.86004e-05	4.41341	58	196	10	10543	AGRN,VTN,TTR,FN1,LAMC1,THBS1,SDC4,DAG1,ACTN1,LAMB1
REAC	Visual phototransduction	REAC:R-HSA-2187338	8.9296e-05	4.04917	97	196	12	10543	AGRN,AKR1C1,RBP4,GPC3,TTR,APOB,APOE,APOM,APOA2,SDC4,APOA1,APOC3
REAC	Regulation of activated PAK-2p34 by proteasome mediated degradation	REAC:R-HSA-211733	0.000117317	3.93064	50	196	9	10543	PSMA7,PSMB6,PSMA3,PSMA1,PSMA5,PSME1,PSMB5,PSMA6,PSMB4
REAC	Cross-presentation of soluble exogenous antigens (endosomes)	REAC:R-HSA-1236978	0.000117317	3.93064	50	196	9	10543	PSMA7,PSMB6,PSMA3,PSMA1,PSMA5,PSME1,PSMB5,PSMA6,PSMB4
REAC	Regulation of Complement cascade	REAC:R-HSA-977606	0.000139935	3.85407	101	196	12	10543	C5,VTN,CPN1,C4BPA,CFI,C4B,F2,PROS1,C3,CLU,C2,CPN2
REAC	Regulation of ornithine decarboxylase (ODC)	REAC:R-HSA-350562	0.000140188	3.85329	51	196	9	10543	PSMA7,PSMB6,PSMA3,PSMA1,PSMA5,PSME1,PSMB5,PSMA6,PSMB4
REAC	ER-Phagosome pathway	REAC:R-HSA-1236974	0.00014255	3.84603	83	196	11	10543	PSMA7,PSMB6,PSMA3,PSMA1,PSMA5,CALR,PDIA3,PSME1,PSMB5,PSMA6,PSMB4
REAC	Plasma lipoprotein assembly, remodeling, and clearance	REAC:R-HSA-174824	0.000158662	3.79953	67	196	10	10543	CLTC,P4HB,APOB,APOE,APOA2,A2M,APOA1,APOC3,ALB,PCSK9
REAC	p53-Independent G1/S DNA damage checkpoint	REAC:R-HSA-69613	0.000166831	3.77772	52	196	9	10543	PSMA7,PSMB6,PSMA3,PSMA1,PSMA5,PSME1,PSMB5,PSMA6,PSMB4
REAC	p53-Independent DNA Damage Response	REAC:R-HSA-69610	0.000166831	3.77772	52	196	9	10543	PSMA7,PSMB6,PSMA3,PSMA1,PSMA5,PSME1,PSMB5,PSMA6,PSMB4
REAC	Vpu mediated degradation of CD4	REAC:R-HSA-180534	0.000166831	3.77772	52	196	9	10543	PSMA7,PSMB6,PSMA3,PSMA1,PSMA5,PSME1,PSMB5,PSMA6,PSMB4
REAC	Ubiquitin Mediated Degradation of Phosphorylated Cdc25A	REAC:R-HSA-69601	0.000166831	3.77772	52	196	9	10543	PSMA7,PSMB6,PSMA3,PSMA1,PSMA5,PSME1,PSMB5,PSMA6,PSMB4
REAC	Autodegradation of the E3 ubiquitin ligase COP1	REAC:R-HSA-349425	0.000166831	3.77772	52	196	9	10543	PSMA7,PSMB6,PSMA3,PSMA1,PSMA5,PSME1,PSMB5,PSMA6,PSMB4
REAC	Ubiquitin-dependent degradation of Cyclin D	REAC:R-HSA-75815	0.000166831	3.77772	52	196	9	10543	PSMA7,PSMB6,PSMA3,PSMA1,PSMA5,PSME1,PSMB5,PSMA6,PSMB4
REAC	Vif-mediated degradation of APOBEC3G	REAC:R-HSA-180585	0.000197757	3.70387	53	196	9	10543	PSMA7,PSMB6,PSMA3,PSMA1,PSMA5,PSME1,PSMB5,PSMA6,PSMB4
REAC	Regulation of Apoptosis	REAC:R-HSA-169911	0.000197757	3.70387	53	196	9	10543	PSMA7,PSMB6,PSMA3,PSMA1,PSMA5,PSME1,PSMB5,PSMA6,PSMB4
REAC	Chylomicron remodeling	REAC:R-HSA-8963901	0.000202082	3.69447	10	196	5	10543	APOB,APOE,APOA2,APOA1,APOC3
REAC	Regulation of RUNX3 expression and activity	REAC:R-HSA-8941858	0.000233532	3.63165	54	196	9	10543	PSMA7,PSMB6,PSMA3,PSMA1,PSMA5,PSME1,PSMB5,PSMA6,PSMB4
REAC	Degradation of AXIN	REAC:R-HSA-4641257	0.00027478	3.56102	55	196	9	10543	PSMA7,PSMB6,PSMA3,PSMA1,PSMA5,PSME1,PSMB5,PSMA6,PSMB4
REAC	FBXL7 down-regulates AURKA during mitotic entry and in early mitosis	REAC:R-HSA-8854050	0.00027478	3.56102	55	196	9	10543	PSMA7,PSMB6,PSMA3,PSMA1,PSMA5,PSME1,PSMB5,PSMA6,PSMB4
REAC	SCF-beta-TrCP mediated degradation of Emi1	REAC:R-HSA-174113	0.00027478	3.56102	55	196	9	10543	PSMA7,PSMB6,PSMA3,PSMA1,PSMA5,PSME1,PSMB5,PSMA6,PSMB4
REAC	Interleukin-12 family signaling	REAC:R-HSA-447115	0.00027478	3.56102	55	196	9	10543	TALDO1,P4HB,CFL1,RPLP0,HSPA9,SOD1,MIF,CRLF1,LMNB1
REAC	Signaling by Interleukins	REAC:R-HSA-449147	0.000307878	3.51162	446	196	25	10543	PSMA7,PSMB6,HSP90AA1,TALDO1,PSMA3,PSMA1,HSPA8,HSP90B1,PSMA5,APP,YWHAZ,P4HB,FN1,CFL1,PSME1,PSMB5,PSMA6,RPLP0,HSPA9,SOD1,MIF,CRLF1,ICAM1,LMNB1,PSMB4
REAC	Hh mutants are degraded by ERAD	REAC:R-HSA-5362768	0.000322188	3.49189	56	196	9	10543	PSMA7,PSMB6,PSMA3,PSMA1,PSMA5,PSME1,PSMB5,PSMA6,PSMB4
REAC	Apoptosis	REAC:R-HSA-109581	0.000328204	3.48386	174	196	15	10543	SPTAN1,PSMA7,PSMB6,PSMA3,PSMA1,PSMA5,YWHAE,YWHAZ,GSN,PSME1,PSMB5,PSMA6,KPNB1,LMNB1,PSMB4
REAC	Stabilization of p53	REAC:R-HSA-69541	0.000376511	3.42422	57	196	9	10543	PSMA7,PSMB6,PSMA3,PSMA1,PSMA5,PSME1,PSMB5,PSMA6,PSMB4
REAC	Degradation of DVL	REAC:R-HSA-4641258	0.000376511	3.42422	57	196	9	10543	PSMA7,PSMB6,PSMA3,PSMA1,PSMA5,PSME1,PSMB5,PSMA6,PSMB4
REAC	Cellular responses to stress	REAC:R-HSA-2262752	0.000379162	3.42117	546	196	28	10543	RPSA,HSPA4,PSMA7,PSMB6,HSP90AB1,HSP90AA1,RPLP2,PSMA3,PSMA1,HSPA8,TUBA1B,PRDX1,HSPA1B,TUBB4B,PSMA5,YWHAE,P4HB,HSPA5,PRDX3,PSME1,PSMB5,PSMA6,RPLP0,HSPA9,SOD1,RPL12,LMNB1,PSMB4
REAC	Complement cascade	REAC:R-HSA-166658	0.000393603	3.40494	111	196	12	10543	C5,VTN,CPN1,C4BPA,CFI,C4B,F2,PROS1,C3,CLU,C2,CPN2
REAC	Programmed Cell Death	REAC:R-HSA-5357801	0.00040831	3.38901	177	196	15	10543	SPTAN1,PSMA7,PSMB6,PSMA3,PSMA1,PSMA5,YWHAE,YWHAZ,GSN,PSME1,PSMB5,PSMA6,KPNB1,LMNB1,PSMB4
REAC	Metabolism of polyamines	REAC:R-HSA-351202	0.000438576	3.35796	58	196	9	10543	PSMA7,PSMB6,PSMA3,PSMA1,PSMA5,PSME1,PSMB5,PSMA6,PSMB4
REAC	Hh mutants abrogate ligand secretion	REAC:R-HSA-5387390	0.000509288	3.29304	59	196	9	10543	PSMA7,PSMB6,PSMA3,PSMA1,PSMA5,PSME1,PSMB5,PSMA6,PSMB4
REAC	CDT1 association with the CDC6:ORC:origin complex	REAC:R-HSA-68827	0.000509288	3.29304	59	196	9	10543	PSMA7,PSMB6,PSMA3,PSMA1,PSMA5,PSME1,PSMB5,PSMA6,PSMB4
REAC	NIK-->noncanonical NF-kB signaling	REAC:R-HSA-5676590	0.000509288	3.29304	59	196	9	10543	PSMA7,PSMB6,PSMA3,PSMA1,PSMA5,PSME1,PSMB5,PSMA6,PSMB4
REAC	Degradation of GLI2 by the proteasome	REAC:R-HSA-5610783	0.000589632	3.22942	60	196	9	10543	PSMA7,PSMB6,PSMA3,PSMA1,PSMA5,PSME1,PSMB5,PSMA6,PSMB4
REAC	Degradation of GLI1 by the proteasome	REAC:R-HSA-5610780	0.000589632	3.22942	60	196	9	10543	PSMA7,PSMB6,PSMA3,PSMA1,PSMA5,PSME1,PSMB5,PSMA6,PSMB4
REAC	Dectin-1 mediated noncanonical NF-kB signaling	REAC:R-HSA-5607761	0.000589632	3.22942	60	196	9	10543	PSMA7,PSMB6,PSMA3,PSMA1,PSMA5,PSME1,PSMB5,PSMA6,PSMB4
REAC	GLI3 is processed to GLI3R by the proteasome	REAC:R-HSA-5610785	0.000589632	3.22942	60	196	9	10543	PSMA7,PSMB6,PSMA3,PSMA1,PSMA5,PSME1,PSMB5,PSMA6,PSMB4
REAC	SCF(Skp2)-mediated degradation of p27/p21	REAC:R-HSA-187577	0.000589632	3.22942	60	196	9	10543	PSMA7,PSMB6,PSMA3,PSMA1,PSMA5,PSME1,PSMB5,PSMA6,PSMB4
REAC	ABC transporter disorders	REAC:R-HSA-5619084	0.000597328	3.22379	77	196	10	10543	PSMA7,PSMB6,PSMA3,PSMA1,PSMA5,APOA1,PSME1,PSMB5,PSMA6,PSMB4
REAC	Interleukin-12 signaling	REAC:R-HSA-9020591	0.00060596	3.21756	45	196	8	10543	TALDO1,P4HB,CFL1,RPLP0,HSPA9,SOD1,MIF,LMNB1
REAC	Cellular responses to external stimuli	REAC:R-HSA-8953897	0.000626003	3.20342	560	196	28	10543	RPSA,HSPA4,PSMA7,PSMB6,HSP90AB1,HSP90AA1,RPLP2,PSMA3,PSMA1,HSPA8,TUBA1B,PRDX1,HSPA1B,TUBB4B,PSMA5,YWHAE,P4HB,HSPA5,PRDX3,PSME1,PSMB5,PSMA6,RPLP0,HSPA9,SOD1,RPL12,LMNB1,PSMB4
REAC	Defective CFTR causes cystic fibrosis	REAC:R-HSA-5678895	0.000680684	3.16705	61	196	9	10543	PSMA7,PSMB6,PSMA3,PSMA1,PSMA5,PSME1,PSMB5,PSMA6,PSMB4
REAC	Antigen processing-Cross presentation	REAC:R-HSA-1236975	0.000859239	3.06589	99	196	11	10543	PSMA7,PSMB6,PSMA3,PSMA1,PSMA5,CALR,PDIA3,PSME1,PSMB5,PSMA6,PSMB4
REAC	Signaling by NOTCH4	REAC:R-HSA-9013694	0.000958963	3.0182	81	196	10	10543	PSMA7,PSMB6,PSMA3,PSMA1,PSMA5,YWHAZ,PSME1,PSMB5,PSMA6,PSMB4
REAC	Autodegradation of Cdh1 by Cdh1:APC/C	REAC:R-HSA-174084	0.00103025	2.98706	64	196	9	10543	PSMA7,PSMB6,PSMA3,PSMA1,PSMA5,PSME1,PSMB5,PSMA6,PSMB4
REAC	Asymmetric localization of PCP proteins	REAC:R-HSA-4608870	0.00103025	2.98706	64	196	9	10543	PSMA7,PSMB6,PSMA3,PSMA1,PSMA5,PSME1,PSMB5,PSMA6,PSMB4
REAC	p53-Dependent G1 DNA Damage Response	REAC:R-HSA-69563	0.00134097	2.87258	66	196	9	10543	PSMA7,PSMB6,PSMA3,PSMA1,PSMA5,PSME1,PSMB5,PSMA6,PSMB4
REAC	p53-Dependent G1/S DNA damage checkpoint	REAC:R-HSA-69580	0.00134097	2.87258	66	196	9	10543	PSMA7,PSMB6,PSMA3,PSMA1,PSMA5,PSME1,PSMB5,PSMA6,PSMB4
REAC	Oxygen-dependent proline hydroxylation of Hypoxia-inducible Factor Alpha	REAC:R-HSA-1234176	0.00134097	2.87258	66	196	9	10543	PSMA7,PSMB6,PSMA3,PSMA1,PSMA5,PSME1,PSMB5,PSMA6,PSMB4
REAC	Host Interactions of HIV factors	REAC:R-HSA-162909	0.001401	2.85356	125	196	12	10543	RAN,PSMA7,PSMB6,PSMA3,PSMA1,PSMA5,PSME1,PSMB5,PSMA6,KPNB1,NPM1,PSMB4
REAC	Regulation of expression of SLITs and ROBOs	REAC:R-HSA-9010553	0.00142724	2.8455	171	196	14	10543	RPSA,PSMA7,PSMB6,RPLP2,PSMA3,PSMA1,PSMA5,DAG1,PSME1,PSMB5,PSMA6,RPLP0,RPL12,PSMB4
REAC	G2/M Transition	REAC:R-HSA-69275	0.00146967	2.83278	196	196	15	10543	PSMA7,PSMB6,HSP90AB1,HSP90AA1,PSMA3,PSMA1,TUBA1B,TUBB4B,PSMA5,TUBB,YWHAE,PSME1,PSMB5,PSMA6,PSMB4
REAC	Gene and protein expression by JAK-STAT signaling after Interleukin-12 stimulation	REAC:R-HSA-8950505	0.00149373	2.82573	36	196	7	10543	TALDO1,CFL1,RPLP0,HSPA9,SOD1,MIF,LMNB1
REAC	Glucose metabolism	REAC:R-HSA-70326	0.00149782	2.82454	85	196	10	10543	PGAM1,GPI,GAPDH,PGK1,ENO1,ALDOA,MDH1,TPI1,GOT1,MDH2
REAC	Activation of NF-kappaB in B cells	REAC:R-HSA-1169091	0.00152443	2.81689	67	196	9	10543	PSMA7,PSMB6,PSMA3,PSMA1,PSMA5,PSME1,PSMB5,PSMA6,PSMB4
REAC	Regulation of RAS by GAPs	REAC:R-HSA-5658442	0.00152443	2.81689	67	196	9	10543	PSMA7,PSMB6,PSMA3,PSMA1,PSMA5,PSME1,PSMB5,PSMA6,PSMB4
REAC	Activation of C3 and C5	REAC:R-HSA-174577	0.00159074	2.7984	7	196	4	10543	C5,C4B,C3,C2
REAC	Signaling by Hedgehog	REAC:R-HSA-5358351	0.00159416	2.79747	149	196	13	10543	PSMA7,PSMB6,PSMA3,PSMA1,TUBA1B,TUBB4B,PSMA5,P4HB,NOTUM,PSME1,PSMB5,PSMA6,PSMB4
REAC	Mitotic G2-G2/M phases	REAC:R-HSA-453274	0.00166604	2.77832	198	196	15	10543	PSMA7,PSMB6,HSP90AB1,HSP90AA1,PSMA3,PSMA1,TUBA1B,TUBB4B,PSMA5,TUBB,YWHAE,PSME1,PSMB5,PSMA6,PSMB4
REAC	APC/C:Cdc20 mediated degradation of Securin	REAC:R-HSA-174154	0.00172905	2.76219	68	196	9	10543	PSMA7,PSMB6,PSMA3,PSMA1,PSMA5,PSME1,PSMB5,PSMA6,PSMB4
REAC	G1/S DNA Damage Checkpoints	REAC:R-HSA-69615	0.00172905	2.76219	68	196	9	10543	PSMA7,PSMB6,PSMA3,PSMA1,PSMA5,PSME1,PSMB5,PSMA6,PSMB4
REAC	Assembly of the pre-replicative complex	REAC:R-HSA-68867	0.00172905	2.76219	68	196	9	10543	PSMA7,PSMB6,PSMA3,PSMA1,PSMA5,PSME1,PSMB5,PSMA6,PSMB4
REAC	Regulation of PTEN stability and activity	REAC:R-HSA-8948751	0.00195681	2.70845	69	196	9	10543	PSMA7,PSMB6,PSMA3,PSMA1,PSMA5,PSME1,PSMB5,PSMA6,PSMB4
REAC	Orc1 removal from chromatin	REAC:R-HSA-68949	0.00249042	2.60373	71	196	9	10543	PSMA7,PSMB6,PSMA3,PSMA1,PSMA5,PSME1,PSMB5,PSMA6,PSMB4
REAC	Regulation of RUNX2 expression and activity	REAC:R-HSA-8939902	0.00249042	2.60373	71	196	9	10543	PSMA7,PSMB6,PSMA3,PSMA1,PSMA5,PSME1,PSMB5,PSMA6,PSMB4
REAC	PCP/CE pathway	REAC:R-HSA-4086400	0.00308357	2.51095	92	196	10	10543	PSMA7,PSMB6,PSMA3,PSMA1,CLTC,PSMA5,PSME1,PSMB5,PSMA6,PSMB4
REAC	CDK-mediated phosphorylation and removal of Cdc6	REAC:R-HSA-69017	0.00314413	2.5025	73	196	9	10543	PSMA7,PSMB6,PSMA3,PSMA1,PSMA5,PSME1,PSMB5,PSMA6,PSMB4
REAC	Cdc20:Phospho-APC/C mediated degradation of Cyclin A	REAC:R-HSA-174184	0.00314413	2.5025	73	196	9	10543	PSMA7,PSMB6,PSMA3,PSMA1,PSMA5,PSME1,PSMB5,PSMA6,PSMB4
REAC	Hedgehog 'off' state	REAC:R-HSA-5610787	0.00316023	2.50028	113	196	11	10543	PSMA7,PSMB6,PSMA3,PSMA1,TUBA1B,TUBB4B,PSMA5,PSME1,PSMB5,PSMA6,PSMB4
REAC	RAF/MAP kinase cascade	REAC:R-HSA-5673001	0.00338985	2.46982	264	196	17	10543	SPTAN1,PSMA7,PSMB6,PSMA3,PSMA1,FGA,PSMA5,SPTBN1,FGG,FN1,ACTG1,PEBP1,PSME1,PSMB5,PSMA6,FGB,PSMB4
REAC	APC:Cdc20 mediated degradation of cell cycle proteins prior to satisfation of the cell cycle checkpoint	REAC:R-HSA-179419	0.00352262	2.45313	74	196	9	10543	PSMA7,PSMB6,PSMA3,PSMA1,PSMA5,PSME1,PSMB5,PSMA6,PSMB4
REAC	APC/C:Cdh1 mediated degradation of Cdc20 and other APC/C:Cdh1 targeted proteins in late mitosis/early G1	REAC:R-HSA-174178	0.00352262	2.45313	74	196	9	10543	PSMA7,PSMB6,PSMA3,PSMA1,PSMA5,PSME1,PSMB5,PSMA6,PSMB4
REAC	Transcriptional regulation by RUNX3	REAC:R-HSA-8878159	0.00374392	2.42667	94	196	10	10543	PSMA7,PSMB6,PSMA3,PSMA1,PSMA5,PSME1,PSMB5,PSMA6,SPP1,PSMB4
REAC	ECM proteoglycans	REAC:R-HSA-3000178	0.00393942	2.40457	75	196	9	10543	AGRN,APP,VTN,FN1,LAMC1,MATN3,DAG1,LAMB1,VCAN
REAC	Cellular response to hypoxia	REAC:R-HSA-1234174	0.00393942	2.40457	75	196	9	10543	PSMA7,PSMB6,PSMA3,PSMA1,PSMA5,PSME1,PSMB5,PSMA6,PSMB4
REAC	MAPK1/MAPK3 signaling	REAC:R-HSA-5684996	0.00434168	2.36234	269	196	17	10543	SPTAN1,PSMA7,PSMB6,PSMA3,PSMA1,FGA,PSMA5,SPTBN1,FGG,FN1,ACTG1,PEBP1,PSME1,PSMB5,PSMA6,FGB,PSMB4
REAC	APC/C:Cdc20 mediated degradation of mitotic proteins	REAC:R-HSA-176409	0.00439764	2.35678	76	196	9	10543	PSMA7,PSMB6,PSMA3,PSMA1,PSMA5,PSME1,PSMB5,PSMA6,PSMB4
REAC	Activation of APC/C and APC/C:Cdc20 mediated degradation of mitotic proteins	REAC:R-HSA-176814	0.00490062	2.30975	77	196	9	10543	PSMA7,PSMB6,PSMA3,PSMA1,PSMA5,PSME1,PSMB5,PSMA6,PSMB4
REAC	Cytokine Signaling in Immune system	REAC:R-HSA-1280215	0.00506473	2.29544	842	196	34	10543	SPTAN1,PSMA7,PSMB6,HSP90AA1,TALDO1,PSMA3,PSMA1,HSPA8,FGA,HSP90B1,PSMA5,APP,YWHAZ,P4HB,SPTBN1,FLNB,FGG,FN1,ACTG1,PEBP1,CFL1,PSME1,PSMB5,PSMA6,RPLP0,HSPA9,SOD1,MIF,FGB,CRLF1,KPNB1,ICAM1,LMNB1,PSMB4
REAC	Signaling by ROBO receptors	REAC:R-HSA-376176	0.00507467	2.29459	217	196	15	10543	RPSA,PSMA7,PSMB6,RPLP2,PSMA3,PSMA1,PSMA5,DAG1,PSME1,PSMB5,PSMA6,CAP1,RPLP0,RPL12,PSMB4
REAC	L1CAM interactions	REAC:R-HSA-373760	0.00520134	2.28388	119	196	11	10543	SPTAN1,HSPA8,TUBA1B,CLTC,TUBB4B,SPTBN1,LAMC1,ACTG1,LAMB1,DPYSL2,ALCAM
REAC	HDL remodeling	REAC:R-HSA-8964058	0.00556128	2.25483	9	196	4	10543	APOE,APOA1,APOC3,ALB
REAC	Transport of gamma-carboxylated protein precursors from the endoplasmic reticulum to the Golgi apparatus	REAC:R-HSA-159763	0.00556128	2.25483	9	196	4	10543	F10,PROC,F2,PROS1
REAC	Plasma lipoprotein remodeling	REAC:R-HSA-8963899	0.0064146	2.19283	30	196	6	10543	APOB,APOE,APOA2,APOA1,APOC3,ALB
REAC	Infectious disease	REAC:R-HSA-5663205	0.00656533	2.18274	815	196	33	10543	RAN,RPSA,XRCC5,PSMA7,PSMB6,HSP90AB1,HSP90AA1,PGK1,RPLP2,ENO1,PSMA3,PSMA1,TUBA1B,XRCC6,CLTC,TUBB4B,PSMA5,APP,TUBB,EEF2,CALR,ACTG1,C3,PSME1,PSMB5,PSMA6,RPLP0,RPL12,KPNB1,PRKCSH,NPM1,HNRNPK,PSMB4
REAC	FLT3 Signaling	REAC:R-HSA-9607240	0.00667334	2.17566	278	196	17	10543	SPTAN1,PSMA7,PSMB6,PSMA3,PSMA1,FGA,PSMA5,SPTBN1,FGG,FN1,ACTG1,PEBP1,PSME1,PSMB5,PSMA6,FGB,PSMB4
REAC	Downstream signaling events of B Cell Receptor (BCR)	REAC:R-HSA-1168372	0.00671446	2.17299	80	196	9	10543	PSMA7,PSMB6,PSMA3,PSMA1,PSMA5,PSME1,PSMB5,PSMA6,PSMB4
REAC	Interleukin-1 signaling	REAC:R-HSA-9020702	0.00710834	2.14823	101	196	10	10543	PSMA7,PSMB6,PSMA3,PSMA1,PSMA5,APP,PSME1,PSMB5,PSMA6,PSMB4
REAC	Regulation of APC/C activators between G1/S and early anaphase	REAC:R-HSA-176408	0.0074339	2.12878	81	196	9	10543	PSMA7,PSMB6,PSMA3,PSMA1,PSMA5,PSME1,PSMB5,PSMA6,PSMB4
REAC	Scavenging by Class A Receptors	REAC:R-HSA-3000480	0.00813471	2.08966	19	196	5	10543	HSP90B1,APOB,APOE,CALR,APOA1
REAC	ABC-family proteins mediated transport	REAC:R-HSA-382556	0.00845209	2.07304	103	196	10	10543	PSMA7,PSMB6,PSMA3,PSMA1,PSMA5,APOA1,PSME1,PSMB5,PSMA6,PSMB4
REAC	Cyclin E associated events during G1/S transition	REAC:R-HSA-69202	0.00907115	2.04234	83	196	9	10543	PSMA7,PSMB6,PSMA3,PSMA1,PSMA5,PSME1,PSMB5,PSMA6,PSMB4
REAC	Degradation of beta-catenin by the destruction complex	REAC:R-HSA-195253	0.00907115	2.04234	83	196	9	10543	PSMA7,PSMB6,PSMA3,PSMA1,PSMA5,PSME1,PSMB5,PSMA6,PSMB4
REAC	Gamma-carboxylation of protein precursors	REAC:R-HSA-159740	0.00913407	2.03934	10	196	4	10543	F10,PROC,F2,PROS1
REAC	Removal of aminoterminal propeptides from gamma-carboxylated proteins	REAC:R-HSA-159782	0.00913407	2.03934	10	196	4	10543	F10,PROC,F2,PROS1
REAC	Metabolism of carbohydrates	REAC:R-HSA-71387	0.00920097	2.03617	285	196	17	10543	AGRN,PGAM1,ALDH1A1,GPI,GAPDH,PGK1,TALDO1,ENO1,ALDOA,MDH1,TKT,TPI1,GPC3,SDC4,GOT1,MDH2,VCAN
REAC	Integrin cell surface interactions	REAC:R-HSA-216083	0.00999852	2.00006	84	196	9	10543	AGRN,FGA,VTN,FGG,FN1,THBS1,FGB,SPP1,ICAM1
REAC	Hedgehog 'on' state	REAC:R-HSA-5632684	0.0110052	1.9584	85	196	9	10543	PSMA7,PSMB6,PSMA3,PSMA1,PSMA5,PSME1,PSMB5,PSMA6,PSMB4
REAC	Cyclin A:Cdk2-associated events at S phase entry	REAC:R-HSA-69656	0.0110052	1.9584	85	196	9	10543	PSMA7,PSMB6,PSMA3,PSMA1,PSMA5,PSME1,PSMB5,PSMA6,PSMB4
REAC	DNA Replication Pre-Initiation	REAC:R-HSA-69002	0.0110052	1.9584	85	196	9	10543	PSMA7,PSMB6,PSMA3,PSMA1,PSMA5,PSME1,PSMB5,PSMA6,PSMB4
REAC	Gamma-carboxylation, transport, and amino-terminal cleavage of proteins	REAC:R-HSA-159854	0.014145	1.8494	11	196	4	10543	F10,PROC,F2,PROS1
REAC	Regulation of mitotic cell cycle	REAC:R-HSA-453276	0.0145566	1.83694	88	196	9	10543	PSMA7,PSMB6,PSMA3,PSMA1,PSMA5,PSME1,PSMB5,PSMA6,PSMB4
REAC	APC/C-mediated degradation of cell cycle proteins	REAC:R-HSA-174143	0.0145566	1.83694	88	196	9	10543	PSMA7,PSMB6,PSMA3,PSMA1,PSMA5,PSME1,PSMB5,PSMA6,PSMB4
REAC	Metabolism	REAC:R-HSA-1430728	0.0158924	1.79881	2070	196	62	10543	AGRN,GLUD1,ACAT2,FASN,RAN,AHCY,PGAM1,RPSA,ALDH1A1,AKR1C1,GPI,GAPDH,PSMA7,PSMB6,QPRT,HSP90AB1,NME2,IDH1,HSP90AA1,PGK1,LDHA,TALDO1,RPLP2,ENO1,ATIC,PSMA3,PSAT1,PSMA1,ALDOA,MDH1,PSMA5,TKT,TPI1,RBP4,BTD,PSAP,GPC3,TTR,PAICS,APOB,APOE,APOM,APOA2,SDC4,APOA1,SERPINA6,APOC3,ALB,AGT,GOT1,PSME1,PSMB5,PSMA6,MDH2,RPLP0,RPL12,UGDH,KPNB1,PSMB4,ACLY,FH,VCAN
REAC	MAPK6/MAPK4 signaling	REAC:R-HSA-5687128	0.0159374	1.79758	89	196	9	10543	PSMA7,PSMB6,PSMA3,PSMA1,PSMA5,PSME1,PSMB5,PSMA6,PSMB4
REAC	Signaling by high-kinase activity BRAF mutants	REAC:R-HSA-6802948	0.0162298	1.78969	35	196	6	10543	FGA,FGG,FN1,ACTG1,PEBP1,FGB
REAC	Switching of origins to a post-replicative state	REAC:R-HSA-69052	0.0190338	1.72048	91	196	9	10543	PSMA7,PSMB6,PSMA3,PSMA1,PSMA5,PSME1,PSMB5,PSMA6,PSMB4
REAC	UCH proteinases	REAC:R-HSA-5689603	0.0207633	1.6827	92	196	9	10543	PSMA7,PSMB6,PSMA3,PSMA1,PSMA5,PSME1,PSMB5,PSMA6,PSMB4
REAC	MAPK family signaling cascades	REAC:R-HSA-5683057	0.0245537	1.60988	308	196	17	10543	SPTAN1,PSMA7,PSMB6,PSMA3,PSMA1,FGA,PSMA5,SPTBN1,FGG,FN1,ACTG1,PEBP1,PSME1,PSMB5,PSMA6,FGB,PSMB4
REAC	RUNX1 regulates transcription of genes involved in differentiation of HSCs	REAC:R-HSA-8939236	0.0246227	1.60866	94	196	9	10543	PSMA7,PSMB6,PSMA3,PSMA1,PSMA5,PSME1,PSMB5,PSMA6,PSMB4
REAC	Binding and Uptake of Ligands by Scavenger Receptors	REAC:R-HSA-2173782	0.0267686	1.57237	95	196	9	10543	HSP90AA1,HSP90B1,APOB,APOE,CALR,APOA1,AMBP,ALB,HP
REAC	MAP2K and MAPK activation	REAC:R-HSA-5674135	0.0306674	1.51332	39	196	6	10543	FGA,FGG,FN1,ACTG1,PEBP1,FGB
REAC	CLEC7A (Dectin-1) signaling	REAC:R-HSA-5607764	0.0315354	1.5012	97	196	9	10543	PSMA7,PSMB6,PSMA3,PSMA1,PSMA5,PSME1,PSMB5,PSMA6,PSMB4
REAC	HIV Infection	REAC:R-HSA-162906	0.0331621	1.47936	226	196	14	10543	RAN,XRCC5,PSMA7,PSMB6,PSMA3,PSMA1,XRCC6,PSMA5,PSME1,PSMB5,PSMA6,KPNB1,NPM1,PSMB4
REAC	Downstream TCR signaling	REAC:R-HSA-202424	0.0341744	1.4663	98	196	9	10543	PSMA7,PSMB6,PSMA3,PSMA1,PSMA5,PSME1,PSMB5,PSMA6,PSMB4
REAC	Mitotic Anaphase	REAC:R-HSA-68882	0.0364498	1.4383	228	196	14	10543	RAN,PSMA7,PSMB6,PSMA3,PSMA1,TUBA1B,TUBB4B,PSMA5,PSME1,PSMB5,PSMA6,KPNB1,LMNB1,PSMB4
REAC	Mitotic Metaphase and Anaphase	REAC:R-HSA-2555396	0.0381975	1.41796	229	196	14	10543	RAN,PSMA7,PSMB6,PSMA3,PSMA1,TUBA1B,TUBB4B,PSMA5,PSME1,PSMB5,PSMA6,KPNB1,LMNB1,PSMB4
REAC	TNFR2 non-canonical NF-kB pathway	REAC:R-HSA-5668541	0.040012	1.39781	100	196	9	10543	PSMA7,PSMB6,PSMA3,PSMA1,PSMA5,PSME1,PSMB5,PSMA6,PSMB4
REAC	GRB2:SOS provides linkage to MAPK signaling for Integrins	REAC:R-HSA-354194	0.0410657	1.38652	14	196	4	10543	FGA,FGG,FN1,FGB
REAC	Attenuation phase	REAC:R-HSA-3371568	0.0410657	1.38652	14	196	4	10543	HSP90AB1,HSP90AA1,HSPA8,HSPA1B
REAC	Syndecan interactions	REAC:R-HSA-3000170	0.0413958	1.38304	26	196	5	10543	VTN,FN1,THBS1,SDC4,ACTN1
REAC	G2/M Checkpoints	REAC:R-HSA-69481	0.0419335	1.37744	149	196	11	10543	PSMA7,PSMB6,PSMA3,PSMA1,PSMA5,YWHAE,YWHAZ,PSME1,PSMB5,PSMA6,PSMB4
REAC	Uptake and function of diphtheria toxin	REAC:R-HSA-5336415	0.0497694	1.30304	6	196	3	10543	HSP90AB1,HSP90AA1,EEF2
REAC	Scavenging by Class F Receptors	REAC:R-HSA-3000484	0.0497694	1.30304	6	196	3	10543	HSP90AA1,APOB,CALR
WP	Complement and Coagulation Cascades	WP:WP558	2.04355e-14	13.6896	59	165	18	7581	CLTC,TFPI,F10,CFI,SERPIND1,C4B,PROC,F2,SERPINF2,PROS1,C3,SERPINA5,CLU,C2,SERPINA1,SERPINC1,F5,FGB
WP	Metabolic reprogramming in colon cancer	WP:WP4290	4.33296e-14	13.3632	44	165	16	7581	GLUD1,FASN,PGAM1,GPI,GAPDH,PGK1,LDHA,TALDO1,ENO1,PSAT1,PKM,TKT,PAICS,MDH2,ACLY,FH
WP	Human Complement System	WP:WP2806	2.52733e-12	11.5973	99	165	20	7581	C5,FGA,VTN,CPN1,F10,FGG,C4BPA,CFI,CALR,LAMC1,THBS1,PROS1,C3,APOA1,C2,ALB,LAMB1,FGB,SPP1,ICAM1
WP	Computational Model of Aerobic Glycolysis	WP:WP4629	2.82499e-09	8.54898	12	165	8	7581	GPI,GAPDH,PGK1,LDHA,ENO1,ALDOA,PKM,TPI1
WP	Glycolysis and Gluconeogenesis	WP:WP534	1.68922e-08	7.77231	45	165	12	7581	PGAM1,GPI,GAPDH,PGK1,LDHA,ENO1,ALDOA,PKM,MDH1,TPI1,GOT1,MDH2
WP	Cori Cycle	WP:WP1946	1.26426e-07	6.89816	17	165	8	7581	PGAM1,GPI,GAPDH,PGK1,LDHA,TALDO1,ALDOA,TPI1
WP	Selenium Micronutrient Network	WP:WP15	1.11309e-06	5.95347	91	165	14	7581	GSR,PRDX1,FGA,SERPINA3,FGG,APOB,F2,APOA1,SAA4,ALB,PRDX3,SOD1,FGB,ICAM1
WP	Folate Metabolism	WP:WP176	6.37255e-06	5.19569	73	165	12	7581	AHCY,FGA,SERPINA3,FGG,APOB,F2,APOA1,SAA4,ALB,SOD1,FGB,ICAM1
WP	Pathways in clear cell renal cell carcinoma	WP:WP4018	4.72283e-05	4.3258	87	165	12	7581	FASN,GPI,GAPDH,PGK1,LDHA,ENO1,PSAT1,ALDOA,PKM,MDH1,TPI1,ACLY
WP	Blood Clotting Cascade	WP:WP272	5.38268e-05	4.269	23	165	7	7581	FGA,F10,FGG,F2,SERPINF2,F5,FGB
WP	Proteasome Degradation	WP:WP183	0.000144394	3.84045	64	165	10	7581	UBA1,PSMA7,PSMB6,PSMA3,PSMA1,PSMA5,PSME1,PSMB5,PSMA6,PSMB4
WP	Composition of Lipid Particles	WP:WP3601	0.000153308	3.81443	10	165	5	7581	APOB,APOE,APOA2,APOA1,APOC3
WP	Vitamin B12 Metabolism	WP:WP1533	0.00024825	3.60511	53	165	9	7581	SERPINA3,APOB,APOE,F2,APOA1,SAA4,ALB,SOD1,ICAM1
WP	Glycolysis in senescence	WP:WP5049	0.000276128	3.55889	11	165	5	7581	GAPDH,PGK1,LDHA,ENO1,PKM
WP	VEGFA-VEGFR2 Signaling Pathway	WP:WP3888	0.000329857	3.48167	437	165	26	7581	GLUD1,GAPDH,HSP90AA1,PGK1,LDHA,RPLP2,CLIC1,ALDOA,CLTC,FGA,TPM3,TKT,YWHAE,SET,P4HB,FLNB,FGG,FN1,CALR,ACTG1,ALB,CFL1,FGB,ICAM1,NCL,DKK1
WP	Amino Acid metabolism	WP:WP3925	0.000565052	3.24791	91	165	11	7581	GLUD1,ALDH1A1,IDH1,LDHA,GSR,PKM,MDH1,GOT1,MDH2,ACLY,FH
WP	COVID-19, thrombosis and anticoagulation	WP:WP4927	0.00104017	2.98289	7	165	4	7581	FGA,FGG,F2,FGB
WP	Parkin-Ubiquitin Proteasomal System pathway	WP:WP2359	0.00265414	2.57608	70	165	9	7581	UBA1,HSPA4,HSPA8,TUBA1B,HSPA1B,TUBB4B,TUBB,HSPA5,HSPA9
WP	Metabolic pathway of LDL, HDL and TG, including diseases	WP:WP4522	0.00332593	2.47809	17	165	5	7581	APOB,APOE,APOA2,APOA1,PCSK9
WP	Statin Pathway	WP:WP430	0.00954185	2.02037	33	165	6	7581	APOB,APOE,APOA2,APOA1,APOC3,PLTP
WP	Urea cycle and associated pathways	WP:WP4595	0.0201907	1.69485	24	165	5	7581	GLUD1,MDH1,GOT1,MDH2,FH
WP	Pathogenic Escherichia coli infection	WP:WP2272	0.0248018	1.60552	55	165	7	7581	TUBA1B,TUBB4B,TUBB,YWHAZ,ACTG1,KRT18,NCL
WP	TCA Cycle and Deficiency of Pyruvate Dehydrogenase complex (PDHc)	WP:WP2453	0.0463863	1.33361	16	165	4	7581	IDH1,MDH1,ACLY,FH
TF	Factor: AP-2gamma:HES-7; motif: NNCACGYGNNNNNNSCCNNNGGS; match class: 1	TF:M08662_1	0.0171764	1.76507	220	217	12	19722	AGRN,FASN,RPLP2,CDH2,RNASET2,KRT8,KRT18,SSB,ILF3,IGFBP1,NCL,ACLY
TF	Factor: HSF4; motif: NGAANRTTCTAGAAN; match class: 1	TF:M11659_1	0.0363569	1.43941	14	217	4	19722	HSP90AB1,HSPD1,HSPE1,HSPA8
TF	Factor: HSF1; motif: TTCTAGAAYNTTC; match class: 1	TF:M04008_1	0.0363569	1.43941	14	217	4	19722	HSP90AB1,HSPD1,HSPE1,HSPA8
TF	Factor: HSF1; motif: NGAANRTTCKAGAAN; match class: 1	TF:M11657_1	0.0491505	1.30847	15	217	4	19722	HSP90AB1,HSPD1,HSPE1,HSPA8
MIRNA	hsa-miR-484	MIRNA:hsa-miR-484	2.62057e-10	9.5816	890	189	41	14834	FASN,PGAM1,XRCC5,GAPDH,HSP90AB1,CTSD,HSP90AA1,RPLP2,ENO1,TUBA1B,PRDX1,HSPA1B,XRCC6,CLTC,PKM,HSP90B1,TKT,APP,TUBB,YWHAE,EEF2,YWHAZ,SET,P4HB,FLNB,CFL1,MDH2,CAP1,ILF3,RPLP0,CADM1,CUTA,FGB,YBX1,KPNB1,NASP,HNRNPC,HNRNPK,LMNB1,NUCB1,ACLY
MIRNA	hsa-miR-615-3p	MIRNA:hsa-miR-615-3p	5.33197e-09	8.27311	891	189	39	14834	FASN,RAN,UBA1,PGAM1,RPSA,HSPA4,GAPDH,HSP90AB1,ENO1,HSPA8,TUBA1B,ALDOA,HSPA1B,XRCC6,ACTN4,CLTC,TPM3,TPI1,TUBB,EEF2,YWHAZ,PSAP,P4HB,SPTBN1,CDH2,PTPRK,FN1,MDH2,ACTN1,ILF3,HSPA9,YBX1,CCT8,KPNB1,HNRNPC,NCL,HNRNPK,LMNA,APEH
MIRNA	hsa-miR-320a	MIRNA:hsa-miR-320a	8.65213e-09	8.06288	584	189	31	14834	TFRC,RAN,HSPA4,GAPDH,HSP90AB1,HSPA8,TUBA1B,ACTN4,PKM,TPI1,TUBB,YWHAE,EEF2,YWHAZ,PAICS,CALR,ACTG1,PRDX3,MDH2,ILF3,HSPA9,ECH1,MIF,DPYSL2,KPNB1,CCT3,IGF2,NPM1,LMNB1,CSE1L,FH
MIRNA	hsa-miR-193b-3p	MIRNA:hsa-miR-193b-3p	5.27285e-06	5.27795	847	189	33	14834	GLUD1,FASN,PGAM1,GPI,PSMA7,HSP90AB1,CLSTN1,KRT19,C5,TUBA1B,HSPA1B,XRCC6,ACTN4,TPI1,TUBB,EEF2,YWHAZ,SPTBN1,LAMC1,ACTG1,PRDX3,CFL1,MDH2,ACTN1,RPL12,ECH1,LAMB1,NPM1,NCL,LMNB1,NUCB1,GDI2,APEH
MIRNA	hsa-miR-324-3p	MIRNA:hsa-miR-324-3p	0.000205052	3.68814	336	189	18	14834	FASN,GAPDH,HSP90AA1,PGK1,HSPA8,ALDOA,HSPA1B,XRCC6,ACTN4,PKM,TUBB,EEF2,PSAP,RPLP0,HSPA9,PRKCSH,ICAM1,ACLY
MIRNA	hsa-miR-149-5p	MIRNA:hsa-miR-149-5p	0.000473089	3.32506	394	189	19	14834	RAN,GPI,GAPDH,HSPA8,HSPA1B,TKT,YWHAE,PSAP,PTPRK,CALR,ACTG1,SERPINC1,ILF3,RPLP0,UGDH,YBX1,KPNB1,NPM1,ACLY
MIRNA	hsa-miR-877-3p	MIRNA:hsa-miR-877-3p	0.000487602	3.31193	602	189	24	14834	FASN,GAPDH,HSP90AB1,PDIA4,TUBA1B,ALDOA,HSPA1B,XRCC6,CLTC,PKM,YWHAE,YWHAZ,SET,CLSTN3,PTPRK,ACTG1,CFL1,CADM1,KPNB1,HNRNPC,NCL,HNRNPK,NUCB1,ACLY
MIRNA	hsa-miR-10a-5p	MIRNA:hsa-miR-10a-5p	0.0012321	2.90935	461	189	20	14834	FASN,AHCY,HSPA4,HSP90AA1,GSR,ATIC,C5,HSPA8,HSPA1B,TPI1,TFPI,EEF2,PAICS,LAMC1,ACTG1,RELN,APOC3,CADM1,UGDH,DPYSL2
MIRNA	hsa-miR-331-3p	MIRNA:hsa-miR-331-3p	0.00278213	2.55562	403	189	18	14834	FASN,UBA1,PGAM1,SPTAN1,XRCC5,GPI,GAPDH,HSPD1,LDHA,HSPA8,HSPA1B,TUBB4B,TKT,TPI1,SPTBN1,ACTG1,PSME1,RPLP0
MIRNA	hsa-miR-2053	MIRNA:hsa-miR-2053	0.00494176	2.30612	79	189	8	14834	GSR,TUBA1B,YWHAE,EEF2,HSPA5,CFL1,HNRNPC,CTSB
MIRNA	hsa-miR-16-5p	MIRNA:hsa-miR-16-5p	0.00759241	2.11962	1556	189	40	14834	AGRN,TFRC,FASN,RAN,RPSA,HSPD1,EEF1G,CTSD,HSP90AA1,PSAT1,HSPA8,HSPA1B,ACTN4,CLTC,TUBB4B,HSP90B1,TPM3,TPI1,APP,TUBB,TFPI,EEF2,HSPA5,F2,CALR,LAMC1,ACTG1,CLU,VASN,PSMB5,ACTN1,RPLP0,CADM1,HSPA9,RPL12,LAMB1,UGDH,YBX1,CCT8,CCT3
MIRNA	hsa-miR-1-3p	MIRNA:hsa-miR-1-3p	0.00947024	2.02364	915	189	28	14834	AGRN,FASN,CTSC,HSPA4,PSMA7,HSPD1,PSAT1,ACTN4,CLTC,HSP90B1,TPM3,TKT,YWHAZ,CDH2,FLNB,FN1,F2,CALR,PDIA3,THBS1,LGALS3BP,SDC4,PSME1,CAP1,ACTN1,LMNB1,APEH,DKK1
MIRNA	hsa-miR-1229-3p	MIRNA:hsa-miR-1229-3p	0.00949996	2.02228	207	189	12	14834	GPI,GAPDH,NME2,TUBA1B,EEF2,YWHAZ,CLSTN3,DAG1,PSMB5,KPNB1,HNRNPK,ACLY
MIRNA	hsa-miR-935	MIRNA:hsa-miR-935	0.0155228	1.80903	120	189	9	14834	LDHA,TALDO1,ALDOA,ACTN4,PKM,TUBB,PTPRK,ACTG1,YBX1
MIRNA	hsa-miR-296-3p	MIRNA:hsa-miR-296-3p	0.0163258	1.78713	255	189	13	14834	GPI,GAPDH,HSP90AB1,TUBA1B,HSPA1B,ACTN4,PKM,EEF2,SET,LGALS3BP,NPM1,ICAM1,LMNA
MIRNA	hsa-miR-423-3p	MIRNA:hsa-miR-423-3p	0.0258432	1.58765	229	189	12	14834	FASN,QPRT,HSPA1B,XRCC6,PKM,APP,SET,SPTBN1,PTPRK,F2,CALR,PSMB5
MIRNA	hsa-miR-222-3p	MIRNA:hsa-miR-222-3p	0.0301263	1.52105	393	189	16	14834	FASN,UBA1,HSP90AA1,ENO1,PKM,APP,EEF2,ACTG1,LGALS3BP,DAG1,PEBP1,MDH2,RPL12,KPNB1,ICAM1,GDI2
MIRNA	hsa-miR-339-5p	MIRNA:hsa-miR-339-5p	0.0332405	1.47833	235	189	12	14834	RAN,AHCY,CTSD,ATIC,HSPA1B,ACTN4,TPM3,TFPI,PSAP,APOC3,HSPA9,UGDH
MIRNA	hsa-miR-4648	MIRNA:hsa-miR-4648	0.0347776	1.4587	76	189	7	14834	HSP90AB1,PKM,TPM3,TFPI,YWHAZ,RPL12,NUCB1
MIRNA	hsa-miR-10b-5p	MIRNA:hsa-miR-10b-5p	0.0440487	1.35607	321	189	14	14834	FASN,AHCY,GSR,ATIC,TUBA1B,HSPA1B,TFPI,PAICS,LAMC1,ACTG1,APOC3,CADM1,UGDH,ACLY
MIRNA	hsa-miR-17-3p	MIRNA:hsa-miR-17-3p	0.0489239	1.31048	172	189	10	14834	TFRC,UBA1,GAPDH,HSP90AB1,GSR,TUBB4B,PKM,YWHAZ,LGALS3BP,ICAM1
